# Supplementary material for: Identification of polymorphisms in cancer patients that differentially affect survival with age
Source: Aging (Albany NY). 2017 Oct 20;9(10):2117–36. doi: 10.18632/aging.101305 (PMC5680559; doi:10.18632/aging.101305)
Supplement: Supplementary file 1 [file aging-09-2117-s001.xlsx]

## Sheet: Index
Page Number	Page Name	Page Description
1a.	Phenotypic Data set assembly	List of WHO ICD-0-3, 2001 topography codes removed to construct the all except skin and all except skin and sex cancer data sets
1b.	HumanGenesInGenAge	List of 298 human genes downloaded from GenAge (http://genomics.senescence.info/genes/human.html)
1c.	84MouseHomologsFromGenAge	List of 83 mouse genes downloaded from GenAge (http://genomics.senescence.info/genes/models.html)
1d.	316AgeingRelatedGenes	List of 316 ageing related genes
1e.	880SNPsIn245Genes	List of 880 SNPs in 245 GenAge genes
1f.	NumberSNPsAssignedToEachGene	List of the number of SNPs assigned to the 245 GenAge genes
1g.	SetOfPathwaysUsedInAnalysis	Set of pathways extracted manually from KEGG based on their known association with longevity through literature search

## Sheet: 1a.PhenotypicDatasetAssembly
Supplementary Table 1a. List of topography codes removed to construct the "All except skin cancer" and the "All except skin and sex cancer" data sets according to WHO ICD-0-3, 2001 codes.
WHO ICD-0-3, 2001 Code	Code Description
All Except Skin Cancer
173	Skin
195	Other/Ill defined
199	Unknown Primary Site
All Except Skin and Sex Cancer
173	Skin
174	Female Breast (Excludes skin of breast)
175	Male Breast (Excludes skin of breast)
179	Uterus
180	Cervix uteri
181	Placenta
182	Corpus uteri or endometrium
183	Ovary, fallopian tube and broad ligament
184	Other and unspecified female genital organs
185	Prostate gland
186	Testis
187	Penis and other male genital organs
195	Other ill defined site
199	Unknown Primary Site

## Sheet: 1b.HumanGenesInGenAge
Supplementary Table 1b. Data set of 298 human genes downloaded from GenAge. More information can be found at http://genomics.senescence.info/genes/human.html.
Entrez Gene ID	Common Gene Name	Chromosomal Band	location_start (bp)	location_end (bp)
2	alpha-2-macroglobulin	12p13.3-p1	9111576	9159754
25	c-abl oncogene 1, receptor tyrosine kinase	9q34.1	130619260	130792614
111	adenylate cyclase 5	3q13.2-q21	124486089	124650082
142	poly (ADP-ribose) polymerase 1	1q41-q42	222855240	222902526
185	angiotensin II receptor, type 1	3q24	148415657	148460789
207	v-akt murine thymoma viral oncogene homolog 1	14q32.32	104306752	104330608
328	APEX nuclease (multifunctional DNA repair enzyme) 1	14q11.2-q1	19993129	19995765
345	apolipoprotein C-III	11q23.1-q2	116205833	116208997
348	apolipoprotein E	19q13.2	50100878	50104489
351	amyloid beta (A4) precursor protein	21q21.2	26174732	26465003
355	Fas (TNF receptor superfamily, member 6)	10q24.1	90740267	90765521
367	androgen receptor	Xq11.2-q12	66546894	66727140
392	Rho GTPase activating protein 1	11p12-q12	46655208	46678696
406	aryl hydrocarbon receptor nuclear translocator-like	11p15	13255901	13365388
472	ataxia telangiectasia mutated	11q22-q23	107599052	107741966
539	ATP synthase, H+ transporting, mitochondrial F1 complex, O subunit	21q22.1-q2	34197627	34210028
545	ataxia telangiectasia and Rad3 related	3q22-q24	143650777	143780349
578	BCL2-antagonist/killer 1	6p21.3	33540322	33548069
581	BCL2-associated X protein	19q13.3-q1	54149928	54156331
596	B-cell CLL/lymphoma 2	18q21.33	58941558	59136910
627	brain-derived neurotrophic factor	11p13	27633019	27675910
641	Bloom syndrome, RecQ helicase-like	15q26.1	89061605	89159601
648	BMI1 polycomb ring finger oncogene	10p11.23	22650145	22660190
672	breast cancer 1, early onset	17q21	38449843	38530934
675	breast cancer 2, early onset	13q12.3	31787616	31871805
701	budding uninhibited by benzimidazoles 1 homolog beta (yeast)	15q15	38240579	38300613
712	complement component 1, q subcomponent, A chain	1p36.12	22963117	22966174
773	calcium channel, voltage-dependent, P/Q type, alpha 1A subunit	19p13.2-p1	13179114	13478317
847	catalase	11p13	34417068	34450183
890	cyclin A2	4q25-q31	123096129	123102485
983	cyclin-dependent kinase 1	10q21.1	62208241	62223930
998	cell division cycle 42 (GTP binding protein, 25kDa)	1p36.1	22251707	22292023
1022	cyclin-dependent kinase 7	5q12.1	68530621	68573256
1026	cyclin-dependent kinase inhibitor 1A (p21, Cip1)	6p21.2	36644236	36655115
1029	cyclin-dependent kinase inhibitor 2A (melanoma, p16, inhibits CDK4)	9p21	21957751	21965038
1030	cyclin-dependent kinase inhibitor 2B (p15, inhibits CDK4)	9p21	22002901	22009311
1050	CCAAT/enhancer binding protein (C/EBP), alpha	19q13.1	38482775	38485160
1051	CCAAT/enhancer binding protein (C/EBP), beta	20q13.1	48240782	48242619
1071	cholesteryl ester transfer protein, plasma	16q21	56995834	57017755
1161	excision repair cross-complementing rodent repair deficiency, complementation group 8	5q12.1	60205415	60276628
1191	clusterin	8p21-p12	27510367	27524855
1268	cannabinoid receptor 1 (brain)	6q14-q15	88849582	88875766
1385	cAMP responsive element binding protein 1	2q34	208220191	208289074
1386	activating transcription factor 2	2q32	175764514	175858404
1387	CREB binding protein	16p13.3	3716569	3870712
1432	mitogen-activated protein kinase 14	6p21.3-p21	36103550	36186513
1454	casein kinase 1, epsilon	22q13.1	37016643	37044035
1490	connective tissue growth factor	6q23.1	132311017	132314147
1499	catenin (cadherin-associated protein), beta 1, 88kDa	3p21	41216015	41256938
1627	drebrin 1	5q35.3	176816219	176833271
1649	DNA-damage-inducible transcript 3	12q13.1-q1	56196639	56200567
1869	E2F transcription factor 1	20q11.2	31727149	31737854
1915	eukaryotic translation elongation factor 1 alpha 1	6q14.1	74283961	74287475
1938	eukaryotic translation elongation factor 2	19pter-q12	3927054	3936446
1950	epidermal growth factor (beta-urogastrone)	4q25	111191653	111291023
1956	epidermal growth factor receptor (erythroblastic leukemia viral (v-erb-b) oncogene homolog, avian)	7p12	54860933	55049239
1958	early growth response 1	5q31.1	137829079	137832903
2006	elastin	7q11.23	72887168	72927681
2010	emerin	Xq28	153128633	153130728
2033	E1A binding protein p300	22q13.2	39813106	39900578
2057	erythropoietin receptor	19p13.3-p1	11349474	11356019
2059	epidermal growth factor receptor pathway substrate 8	12p12.3	15773074	15942509
2064	v-erb-b2 erythroblastic leukemia viral oncogene homolog 2, neuro/glioblastoma derived oncogene homolog (avian)	17q11.2-q1	35109921	35138436
2067	excision repair cross-complementing rodent repair deficiency, complementation group 1 (includes overlapping antisense sequence)	19q13.2-q1	50608532	50618642
2068	excision repair cross-complementing rodent repair deficiency, complementation group 2	19q13.3	50546685	50565669
2071	excision repair cross-complementing rodent repair deficiency, complementation group 3 (xeroderma pigmentosum group B complementing)	2q21	127731095	127767982
2072	excision repair cross-complementing rodent repair deficiency, complementation group 4	16p13.3-p1	13921515	13953706
2073	excision repair cross-complementing rodent repair deficiency, complementation group 5	13q22	102296420	102326346
2074	excision repair cross-complementing rodent repair deficiency, complementation group 6	10q11.23	50336714	50417078
2099	estrogen receptor 1	6q25.1	152220799	152516520
2185	PTK2B protein tyrosine kinase 2 beta	8p21.1	27224915	27372820
2202	EGF-containing fibulin-like extracellular matrix protein 1	2p16	55946606	56003860
2237	flap structure-specific endonuclease 1	11q12	61316725	61321284
2260	fibroblast growth factor receptor 1	8p11.2-p11	38389448	38445293
2305	forkhead box M1	12p13	2837110	2856564
2308	forkhead box O1	13q14.1	40027816	40138734
2309	forkhead box O3	6q21	108988761	109108647
2321	fms-related tyrosine kinase 1 (vascular endothelial growth factor/vascular permeability factor receptor)	13q12	27773789	27967232
2353	FBJ murine osteosarcoma viral oncogene homolog	14q24.3	74815283	74818666
2475	mechanistic target of rapamycin (serine/threonine kinase)	1p36.2	11100857	11256830
2547	X-ray repair complementing defective repair in Chinese hamster cells 6	22q13.2-q1	40341853	40384542
2688	growth hormone 1	17q24.2	59348294	59349930
2690	growth hormone receptor	5p13-p12	42459782	42757736
2691	growth hormone releasing hormone	20q11.2	35312902	35318706
2692	growth hormone releasing hormone receptor	7p14	30776875	30792381
2729	glutamate-cysteine ligase, catalytic subunit	6p12	53470097	53517790
2730	glutamate-cysteine ligase, modifier subunit	1p22.1	94064610	94087033
2876	glutathione peroxidase 1	3p21.3	49369614	49370795
2879	glutathione peroxidase 4 (phospholipid hydroperoxidase)	19p13.3	1054936	1057787
2885	growth factor receptor-bound protein 2	17q24-q25	70825752	70913384
2896	granulin	17q21.32	42422490	42430473
2908	nuclear receptor subfamily 3, group C, member 1 (glucocorticoid receptor)	5q31.3	142639324	142763087
2931	glycogen synthase kinase 3 alpha	19q13.2	42734337	42746735
2932	glycogen synthase kinase 3 beta	3q13.3	121028237	121295203
2936	glutathione reductase	8p21.1	30655976	30704985
2937	glutathione synthetase	20q11.2	32979897	33007262
2941	glutathione S-transferase alpha 4	6p12.1	52950709	52968099
2950	glutathione S-transferase pi 1	11q13	67107861	67110699
2966	general transcription factor IIH, polypeptide 2, 44kDa	5q12.2-q13	68891824	68924334
3014	H2A histone family, member X	11q23.2-q2	118469796	118471387
3064	huntingtin	4p16.3	3113411	3282656
3065	histone deacetylase 1	1p34	32426800	32468317
3066	histone deacetylase 2	6q21	114368619	114398967
3070	helicase, lymphoid-specific	10q24.2	96295563	96351845
3084	neuregulin 1	8p21-p12	32624285	32720285
3090	hypermethylated in cancer 1	17p13.3	1905143	1909731
3091	hypoxia inducible factor 1, alpha subunit (basic helix-loop-helix transcription factor)	14q21-q24	61231991	61284729
3146	high-mobility group box 1	13q12	29931996	29938013
3148	high-mobility group box 2	4q31	174627517	174630322
3217	homeobox B7	17q21.3	44039592	44043378
3221	homeobox C4	12q13.3	52733927	52735630
3265	v-Ha-ras Harvey rat sarcoma viral oncogene homolog	11p15.5	522242	525550
3297	heat shock transcription factor 1	8q24.3	145486090	145509187
3303	heat shock 70kDa protein 1A	6p21.3	31891315	31893698
3304	heat shock 70kDa protein 1B	6p21.3	31903502	31906010
3312	heat shock 70kDa protein 8	11q24.1	122433410	122438054
3313	heat shock 70kDa protein 9 (mortalin)	5q31.1	137918923	137939014
3320	heat shock protein 90kDa alpha (cytosolic), class A member 1	14q32.33	101617144	101623135
3329	heat shock 60kDa protein 1 (chaperonin)	2q33.1	198176815	198190146
3479	insulin-like growth factor 1 (somatomedin C)	12q22-q23	101292143	101376791
3480	insulin-like growth factor 1 receptor	15q26.3	97010287	97319034
3481	insulin-like growth factor 2 (somatomedin A)	11p15.5	2110531	2116578
3485	insulin-like growth factor binding protein 2, 36kDa	2q33-q34	217498126	217529158
3486	insulin-like growth factor binding protein 3	7p13-p12	45725189	45734057
3551	inhibitor of kappa light polypeptide gene enhancer in B-cells, kinase beta	8p11.2	42128819	42190170
3558	interleukin 2	4q26-q27	123730232	123735485
3561	interleukin 2 receptor, gamma (severe combined immunodeficiency)	Xq13.1	70110279	70114424
3569	interleukin 6 (interferon, beta 2)	7p21	22540059	22544856
3574	interleukin 7	8q12-q13	79807560	79880313
3575	interleukin 7 receptor	5p13	35892747	35912678
3630	insulin	11p15.5	2137584	2139000
3643	insulin receptor	19p13.3-p1	7067637	7245011
3667	insulin receptor substrate 1	2q36	227425442	227489980
3717	Janus kinase 2	9p24	4975244	5117995
3725	jun oncogene	1p32-p31	58958483	58961806
3727	jun D proto-oncogene	19p13.2	18251569	18253468
3738	potassium voltage-gated channel, shaker-related subfamily, member 3	1p13.3	111214309	111217654
3952	leptin	7q31.3	127475281	127491632
3953	leptin receptor	1p31	65598338	65814843
4000	lamin A/C	1q21.2-q21	152897570	152922944
4001	lamin B1	5q23.3-q31	126140731	126200608
4036	low density lipoprotein receptor-related protein 2	2q24-q31	169810367	170044520
4084	MAX dimerization protein 1	2p13-p12	70053967	70077256
4137	microtubule-associated protein tau	17q21.1	41327623	41458611
4149	MYC associated factor X	14q23	64611597	64638980
4193	Mdm2 p53 binding protein homolog (mouse)	12q14.3-q1	67488246	67520481
4217	mitogen-activated protein kinase kinase kinase 5	6q22.33	136919880	137155349
4282	macrophage migration inhibitory factor (glycosylation-inhibiting factor)	22q11.23	24236564	24237408
4292	mutL homolog 1, colon cancer, nonpolyposis type 2 (E. coli)	3p21.3	37009982	37067339
4303	forkhead box O4	Xq13.1	70099230	70106405
4482	methionine sulfoxide reductase A	8p23.1	9949235	10323803
4493	metallothionein 1E	16q13	56659556	56661023
4512	mitochondrially encoded cytochrome c oxidase I	mtDNA	5901	7518
4521	nudix (nucleoside diphosphate linked moiety X)-type motif 1	7p22	2281856	2290779
4601	MAX interactor 1	10q24-q25	111975768	112037111
4609	v-myc myelocytomatosis viral oncogene homolog (avian)	8q24.12-q2	128817685	128822853
4683	nibrin	8q21	91014888	91066072
4780	nuclear factor (erythroid-derived 2)-like 2	2q31	178095030	178129858
4790	nuclear factor of kappa light polypeptide gene enhancer in B-cells 1	4q24	103779672	103895661
4791	nuclear factor of kappa light polypeptide gene enhancer in B-cells 2 (p49/p100)	10q24	104145452	104152257
4792	nuclear factor of kappa light polypeptide gene enhancer in B-cells inhibitor, alpha	14q13	34940467	34943695
4803	nerve growth factor (beta polypeptide)	1p13.1	115540580	115592899
4804	nerve growth factor receptor (TNFR superfamily, member 16)	17q21-q22	44927665	44947360
5052	peroxiredoxin 1	1p34.1	45645800	45656702
5069	pregnancy-associated plasma protein A, pappalysin 1	9q33.2	117955892	118204421
5105	phosphoenolpyruvate carboxykinase 1 (soluble)	20q13.31	55569543	55574919
5110	protein-L-isoaspartate (D-aspartate) O-methyltransferase	6q24-q25	150163078	150224670
5111	proliferating cell nuclear antigen	20pter-p12	5043598	5048647
5155	platelet-derived growth factor beta polypeptide (simian sarcoma viral (v-sis) oncogene homolog)	22q12.3-q1	37944218	37965490
5156	platelet-derived growth factor receptor, alpha polypeptide	4q12	55095263	55164411
5159	platelet-derived growth factor receptor, beta polypeptide	5q31-q32	149473595	149515503
5170	3-phosphoinositide dependent protein kinase-1	16p13.3	2527970	2593189
5290	phosphatidylinositol-4,5-bisphosphate 3-kinase, catalytic subunit alpha	3q26.3	178866310	178952499
5291	phosphoinositide-3-kinase, catalytic, beta polypeptide	3q22.3	139856928	139960883
5295	phosphoinositide-3-kinase, regulatory subunit 1 (alpha)	5q13.1	67558217	67633403
5300	peptidylprolyl cis/trans isomerase, NIMA-interacting 1	19p13	9807012	9821356
5328	plasminogen activator, urokinase	10q24	75340940	75347258
5336	phospholipase C, gamma 2 (phosphatidylinositol-specific)	16q24.1	80370430	80549399
5367	pro-melanin-concentrating hormone	12q23-q24	101092705	101094081
5371	promyelocytic leukemia	15q22	72074066	72126162
5422	polymerase (DNA directed), alpha 1, catalytic subunit	Xp22.1-p21	24471720	24774757
5423	polymerase (DNA directed), beta	8p11.2	42315186	42348470
5424	polymerase (DNA directed), delta 1, catalytic subunit 125kDa	19q13.3	55579407	55613082
5428	polymerase (DNA directed), gamma	15q25	87660552	87679030
5444	paraoxonase 1	7q21.3	94571638	94598495
5449	POU class 1 homeobox 1	3p11	87391472	87408427
5465	peroxisome proliferator-activated receptor alpha	22q12-q13	44867017	44958329
5468	peroxisome proliferator-activated receptor gamma	3p25	12329348	12475854
5469	mediator complex subunit 1	17q12-q21.	34816379	34861030
5499	protein phosphatase 1, catalytic subunit, alpha isozyme	11q13	66922227	66925952
5578	protein kinase C, alpha	17q22-q23.	61729387	62237324
5580	protein kinase C, delta	3p21.31	53170262	53201771
5591	protein kinase, DNA-activated, catalytic polypeptide	8q11	48848221	49035296
5595	mitogen-activated protein kinase 3	16p12-p11.	30032927	30042039
5599	mitogen-activated protein kinase 8	10q11.22	49279692	49313189
5601	mitogen-activated protein kinase 9	5q35	179595389	179640216
5626	PROP paired-like homeobox 1	5q35.3	177351841	177355849
5663	presenilin 1	14q24.3	72672931	72756862
5728	phosphatase and tensin homolog	10q23.3	89613174	89716382
5743	prostaglandin-endoperoxide synthase 2 (prostaglandin G/H synthase and cyclooxygenase)	1q25.2-q25	183372625	183381213
5747	PTK2 protein tyrosine kinase 2	8q24-qter	141737682	142080514
5770	protein tyrosine phosphatase, non-receptor type 1	20q13.1-q1	48560297	48634491
5781	protein tyrosine phosphatase, non-receptor type 11	12q24	111319255	111410436
5830	peroxisomal biogenesis factor 5	12p13.3	7234223	7255342
5831	pyrroline-5-carboxylate reductase 1	17q25.3	79890266	79894967
5888	RAD51 homolog (RecA homolog, E. coli) (S. cerevisiae)	15q15.1	38774660	38811646
5893	RAD52 homolog (S. cerevisiae)	12p13-p12.	891503	929109
5925	retinoblastoma 1	13q14.2	47775911	47954023
5970	v-rel reticuloendotheliosis viral oncogene homolog A (avian)	11q13	65178392	65186951
5979	ret proto-oncogene	10q11.2	42892517	42945799
6117	replication protein A1, 70kDa	17p13.3	1680094	1748119
6285	S100 calcium binding protein B	21q22.3	46842958	46849424
6391	succinate dehydrogenase complex, subunit C, integral membrane protein, 15kDa	1q21	158097242	158146049
6464	SHC (Src homology 2 domain containing) transforming protein 1	1q21	151747847	151759913
6561	solute carrier family 13 (sodium/sulfate symporters), member 1	7q31.32	122753587	122840024
6623	synuclein, gamma (breast cancer-specific protein 1)	10q23.2-q2	88708392	88712995
6647	superoxide dismutase 1, soluble	21q22.1	31953805	31963112
6648	superoxide dismutase 2, mitochondrial	6q25.3	160073582	160084614
6667	Sp1 transcription factor	12q13.1	52060245	52096491
6750	somatostatin	3q28	188869406	188870808
6753	somatostatin receptor 3	22q13.1	35926744	35932853
6774	signal transducer and activator of transcription 3 (acute-phase response factor)	17q21.31	37718868	37794039
6776	signal transducer and activator of transcription 5A	17q11.2	37693090	37717484
6777	signal transducer and activator of transcription 5B	17q11.2	37604721	37681950
6794	serine/threonine kinase 11	19p13.3	1157641	1179428
6872	TAF1 RNA polymerase II, TATA box binding protein (TBP)-associated factor, 250kDa	Xq13.1	70369134	70467321
6908	TATA box binding protein	6q27	170781102	170799578
6929	transcription factor 3 (E2A immunoglobulin enhancer binding factors E12/E47)	19p13.3	1560294	1601277
7012	telomerase RNA component	3q26	127471195	127495720
7013	telomeric repeat binding factor (NIMA-interacting) 1	8q13	74083662	74122281
7014	telomeric repeat binding factor 2	16q22.1	67947035	67977374
7015	telomerase reverse transcriptase	5p15.33	1306286	1348159
7020	transcription factor AP-2 alpha (activating enhancer binding protein 2 alpha)	6p24	10506384	10523252
7027	transcription factor Dp-1	13q34	113287056	113343503
7040	transforming growth factor, beta 1	19q13.2	46528067	46551628
7124	tumor necrosis factor (TNF superfamily, member 2)	6p21.3	31651328	31654091
7150	topoisomerase (DNA) I	20q12-q13.	39090875	39186541
7153	topoisomerase (DNA) II alpha 170kDa	17q21-q22	35798320	35827695
7155	topoisomerase (DNA) II beta 180kDa	3p24	25614478	25680792
7157	tumor protein p53	17p13.1	7512463	7531642
7158	tumor protein p53 binding protein 1	15q15-q21	43699411	43802706
7161	tumor protein p73	1p36.3	3569128	3652764
7174	tripeptidyl peptidase II	13q32-q33	103249285	103331523
7295	thioredoxin	9q31	110085862	110098327
7314	ubiquitin B	17p12-p11.	16225091	16226779
7329	ubiquitin-conjugating enzyme E2I (UBC9 homolog, yeast)	16p13.3	1299638	1315391
7341	SMT3 suppressor of mif two 3 homolog 1 (S. cerevisiae)	2q33	202896414	202928816
7345	ubiquitin carboxyl-terminal esterase L1 (ubiquitin thiolesterase)	4p14	41099856	41111373
7350	uncoupling protein 1 (mitochondrial, proton carrier)	4q28-q31	141700500	141709457
7351	uncoupling protein 2 (mitochondrial, proton carrier)	11q13	73363363	73371537
7352	uncoupling protein 3 (mitochondrial, proton carrier)	11q13	73388984	73397778
7415	valosin-containing protein	9p13.3	35046560	35062564
7422	vascular endothelial growth factor A	6p12	43845923	43860314
7486	Werner syndrome, RecQ helicase-like	8p12-p11.2	31010319	31150818
7507	xeroderma pigmentosum, complementation group A	9q22.3	97516746	97539194
7520	X-ray repair complementing defective repair in Chinese hamster cells 5 (double-strand-break rejoining)	2q35	216799637	216896509
7534	tyrosine 3-monooxygenase/tryptophan 5-monooxygenase activation protein, zeta polypeptide	8q23.1	102000089	102033447
8074	fibroblast growth factor 23	12p13.3	4347654	4359155
8480	RAE1 RNA export 1 homolog (S. pombe)	20q13.31	55359551	55386925
8493	protein phosphatase, Mg2+/Mn2+ dependent, 1D	17q23.2	56032336	56096818
8626	tumor protein p63	3q28	190831917	191097764
8660	insulin receptor substrate 2	13q34	109204186	109236915
8694	diacylglycerol O-acyltransferase 1	8q24.3	145538245	145550581
8820	HESX homeobox 1	3p21.2-p21	57207264	57209320
8835	suppressor of cytokine signaling 2	12q	93963597	93970520
8841	histone deacetylase 3	5q31	140980626	140996596
8878	sequestosome 1	5q35	179233387	179265077
8940	topoisomerase (DNA) III beta	22q11.22	20635957	20661701
9104	regucalcin (senescence marker protein-30)	Xp11.3	46694225	46708966
9131	apoptosis-inducing factor, mitochondrion-associated, 1	Xq25-q26	128988871	129025343
9184	budding uninhibited by benzimidazoles 3 homolog (yeast)	10q26	124903859	124914869
9241	noggin	17q21-q22	52026273	52027542
9365	klotho	13q12	32488570	32538279
9401	RecQ protein-like 4	8q24.3	145707621	145713976
9521	eukaryotic translation elongation factor 1 epsilon 1	6p24.3	8073592	8102827
9575	clock homolog (mouse)	4q12	55993417	56107754
9611	nuclear receptor co-repressor 1	17p11.2	15875983	16059570
9612	nuclear receptor corepressor 2	12q24	124808956	125052009
10229	coenzyme Q7 homolog, ubiquinone (yeast)	16p13.11-p	18986427	18998851
10269	zinc metallopeptidase (STE24 homolog, S. cerevisiae)	1p34	40392871	40428944
10273	STIP1 homology and U-box containing protein 1	16p13.3	670116	672769
10555	1-acylglycerol-3-phosphate O-acyltransferase 2 (lysophosphatidic acid acyltransferase, beta)	9q34.3	136843432	136857712
10683	delta-like 3 (Drosophila)	19q13	44681426	44690948
10891	peroxisome proliferator-activated receptor gamma, coactivator 1 alpha	4p15.1	23402742	23500798
11200	CHK2 checkpoint homolog (S. pombe)	22	27413731	27467822
23353	Sad1 and UNC84 domain containing 1	7p22.3	855193	914556
23410	sirtuin 3	11p15.5	215029	236361
23411	sirtuin (silent mating type information regulation 2 homolog) 1 (S. cerevisiae)	10q21.3	69314432	69348147
25942	SIN3 homolog A, transcription regulator (yeast)	15q23	73450329	73530979
26291	fibroblast growth factor 21	19q13.33	49258815	49261586
26580	Berardinelli-Seip congenital lipodystrophy 2 (seipin)	11q12-q13.	62214322	62231395
26959	HMG-box transcription factor 1	7q22-q31	106403410	106436924
27429	HtrA serine peptidase 2	2p12	74756531	74760682
51547	sirtuin 7	17q25	79869814	79876057
51548	sirtuin (silent mating type information regulation 2 homolog) 6 (S. cerevisiae)	19p13.3	4125106	4133596
54840	aprataxin	9p13.3	32962608	32991606
56648	eukaryotic translation initiation factor 5A2	3q26.2	170606203	170626425
493856	CDGSH iron sulfur domain 2	4q24	103790134	103813963

## Sheet: 1c.83MouseHomologsFromGenAge
Supplementary Table 1c. List of 83 human homologs to mouse genes downloaded from GenAge (http://genomics.senescence.info/genes/models.html)
Human Entrez ID	Mouse Entrez ID
111	224129
185	11607
291	11739
348	11816
392	228359
406	11865
472	11920
545	245000
581	12028
701	12236
835	12366
847	12359
857	12389
1026	12575
1051	12608
1443	14599
1444	14599
1756	13405
2068	13871
2072	50505
2202	216616
2305	14235
2335	14268
2395	14297
2547	14375
2688	14599
2690	14600
2692	14602
3064	15194
3070	15201
3184	11991
3351	15551
3479	16000
3480	16001
3643	16337
3667	16367
3727	16478
3738	16491
4000	16905
4171	17216
4249	107895
4436	17685
4846	18127
5052	18477
5069	18491
5074	114774
5105	18534
5328	18792
5428	18975
5449	18736
5468	19016
5626	19127
6561	55961
6648	20656
6834	20930
7014	21750
7015	21752
7157	22059
7158	27223
7174	22019
7295	22166
7351	22228
7507	22590
8074	64654
8480	66679
8493	53892
8626	22061
8660	384783
8835	216233
8940	21976
9184	12237
9365	16591
9521	66143
9575	12753
10210	106021
10229	12850
10269	230709
10273	56424
11200	50883
51547	209011
51548	50721
79661	72774
493856	67006

## Sheet: 1d.316AgeingRelatedGenes
Supplementary Table 1d. List of 316 non redundant ageing related genes; the table was obtained by combining supplementary tables 1b and 1c, and removing redundancy.
Ensembl Gene ID
ENSG00000001084
ENSG00000002016
ENSG00000005339
ENSG00000005421
ENSG00000012048
ENSG00000012061
ENSG00000017427
ENSG00000023909
ENSG00000026103
ENSG00000030110
ENSG00000030582
ENSG00000049167
ENSG00000049540
ENSG00000050748
ENSG00000051180
ENSG00000051382
ENSG00000059728
ENSG00000062822
ENSG00000064300
ENSG00000064835
ENSG00000067369
ENSG00000070501
ENSG00000070831
ENSG00000071564
ENSG00000073111
ENSG00000073282
ENSG00000073756
ENSG00000076242
ENSG00000077097
ENSG00000077150
ENSG00000077463
ENSG00000077782
ENSG00000078900
ENSG00000079246
ENSG00000080815
ENSG00000080824
ENSG00000081479
ENSG00000081800
ENSG00000082701
ENSG00000084073
ENSG00000084207
ENSG00000087088
ENSG00000087237
ENSG00000090932
ENSG00000091831
ENSG00000095002
ENSG00000096717
ENSG00000096968
ENSG00000097007
ENSG00000100038
ENSG00000100311
ENSG00000100393
ENSG00000100644
ENSG00000100823
ENSG00000100906
ENSG00000100983
ENSG00000101146
ENSG00000101412
ENSG00000101868
ENSG00000102119
ENSG00000102755
ENSG00000102882
ENSG00000103266
ENSG00000103275
ENSG00000104320
ENSG00000104365
ENSG00000104432
ENSG00000104687
ENSG00000104884
ENSG00000105329
ENSG00000105550
ENSG00000105723
ENSG00000105856
ENSG00000105974
ENSG00000106128
ENSG00000106144
ENSG00000106268
ENSG00000107643
ENSG00000109320
ENSG00000109424
ENSG00000109471
ENSG00000109819
ENSG00000109971
ENSG00000110245
ENSG00000111206
ENSG00000112062
ENSG00000112096
ENSG00000112592
ENSG00000112715
ENSG00000112964
ENSG00000113013
ENSG00000113368
ENSG00000113580
ENSG00000113721
ENSG00000113758
ENSG00000115317
ENSG00000115380
ENSG00000115414
ENSG00000115457
ENSG00000115966
ENSG00000116030
ENSG00000116044
ENSG00000116478
ENSG00000116678
ENSG00000117450
ENSG00000118046
ENSG00000118260
ENSG00000118432
ENSG00000118523
ENSG00000118689
ENSG00000118702
ENSG00000118972
ENSG00000119950
ENSG00000119969
ENSG00000120265
ENSG00000120738
ENSG00000120833
ENSG00000120885
ENSG00000120899
ENSG00000121691
ENSG00000121879
ENSG00000122861
ENSG00000124253
ENSG00000124762
ENSG00000124802
ENSG00000125686
ENSG00000125952
ENSG00000126561
ENSG00000127445
ENSG00000130203
ENSG00000130522
ENSG00000130988
ENSG00000131747
ENSG00000132170
ENSG00000132383
ENSG00000132604
ENSG00000132646
ENSG00000133116
ENSG00000133794
ENSG00000134058
ENSG00000134259
ENSG00000134852
ENSG00000134853
ENSG00000134899
ENSG00000134900
ENSG00000135312
ENSG00000135679
ENSG00000136244
ENSG00000136810
ENSG00000136936
ENSG00000136997
ENSG00000137074
ENSG00000137203
ENSG00000138668
ENSG00000138798
ENSG00000139197
ENSG00000139618
ENSG00000139687
ENSG00000140398
ENSG00000140443
ENSG00000140464
ENSG00000140521
ENSG00000140992
ENSG00000141027
ENSG00000141510
ENSG00000141736
ENSG00000141837
ENSG00000142082
ENSG00000142168
ENSG00000142192
ENSG00000142208
ENSG00000143252
ENSG00000143799
ENSG00000144381
ENSG00000144891
ENSG00000145354
ENSG00000145386
ENSG00000145675
ENSG00000145736
ENSG00000146648
ENSG00000146674
ENSG00000147133
ENSG00000147168
ENSG00000147601
ENSG00000147883
ENSG00000147889
ENSG00000148290
ENSG00000149311
ENSG00000150907
ENSG00000151491
ENSG00000151729
ENSG00000152127
ENSG00000154229
ENSG00000154277
ENSG00000154473
ENSG00000156508
ENSG00000156709
ENSG00000156970
ENSG00000157005
ENSG00000157168
ENSG00000160307
ENSG00000160691
ENSG00000160789
ENSG00000160957
ENSG00000161011
ENSG00000163161
ENSG00000163577
ENSG00000163666
ENSG00000163932
ENSG00000164104
ENSG00000164362
ENSG00000164828
ENSG00000164867
ENSG00000164924
ENSG00000165060
ENSG00000165280
ENSG00000165392
ENSG00000165731
ENSG00000167186
ENSG00000167244
ENSG00000167468
ENSG00000167658
ENSG00000168000
ENSG00000168036
ENSG00000168283
ENSG00000168496
ENSG00000168610
ENSG00000168685
ENSG00000169047
ENSG00000169083
ENSG00000169375
ENSG00000169398
ENSG00000169692
ENSG00000169715
ENSG00000170312
ENSG00000170315
ENSG00000170345
ENSG00000170836
ENSG00000170899
ENSG00000171105
ENSG00000171720
ENSG00000171791
ENSG00000171862
ENSG00000172216
ENSG00000172531
ENSG00000173039
ENSG00000173175
ENSG00000173267
ENSG00000173372
ENSG00000173757
ENSG00000174697
ENSG00000174775
ENSG00000175054
ENSG00000175197
ENSG00000175220
ENSG00000175325
ENSG00000175564
ENSG00000175567
ENSG00000175595
ENSG00000175806
ENSG00000175899
ENSG00000176697
ENSG00000177272
ENSG00000177374
ENSG00000177425
ENSG00000177606
ENSG00000177885
ENSG00000179295
ENSG00000182752
ENSG00000183010
ENSG00000183395
ENSG00000183691
ENSG00000183765
ENSG00000184481
ENSG00000185000
ENSG00000185122
ENSG00000185591
ENSG00000185950
ENSG00000186868
ENSG00000186951
ENSG00000187266
ENSG00000187531
ENSG00000188486
ENSG00000189403
ENSG00000196396
ENSG00000196419
ENSG00000196498
ENSG00000196591
ENSG00000197299
ENSG00000197386
ENSG00000197442
ENSG00000197579
ENSG00000197943
ENSG00000198176
ENSG00000198353
ENSG00000198793
ENSG00000198804
ENSG00000198900
ENSG00000198947
ENSG00000204388
ENSG00000204389
ENSG00000204414
ENSG00000213218
ENSG00000213923
ENSG00000225830
ENSG00000232810
ENSG00000233276
ENSG00000240972
ENSG00000241837
ENSG00000245848
ENSG00000253729
ENSG00000254647
ENSG00000259384
ENSG00000260027
ENSG00000270141
ENSG00000278195

## Sheet: 1e.880SNPsIn245Genes
Supplementary Table 1e. List of 880 SNPs located within 60kb of 245 of the 316 longevity associated genes.
SNP ss ID	SNP rs ID	SNP Location (Chr, base pair)	Entrez Gene ID	Gene Location (Including +-60kb) (Chr, basepair_basepair)
ss74839488	rs4839542	Chr1:110612973	3738	Chr1:110593560_110735033
ss74826949	rs2640492	Chr1:110627477	3738	Chr1:110593560_110735033
ss74812475	rs11466111	Chr1:115286557	4803	Chr1:115225916_115398384
ss74808723	rs6330	Chr1:115286692	4803	Chr1:115225916_115398384
ss74854328	rs719452	Chr1:115294436	4803	Chr1:115225916_115398384
ss74832605	rs2239622	Chr1:115295088	4803	Chr1:115225916_115398384
ss74852243	rs11102922	Chr1:115313457	4803	Chr1:115225916_115398384
ss74822606	rs11102924	Chr1:115324650	4803	Chr1:115225916_115398384
ss74806433	rs2061690	Chr1:154946604	6464	Chr1:154902298_155034483
ss74806905	rs7535144	Chr1:154992637	6464	Chr1:154902298_155034483
ss74822257	rs6682611	Chr1:155025198	6464	Chr1:154902298_155034483
ss74806904	rs2297792	Chr1:156041653	4000	Chr1:156022546_156200089
ss74835345	rs915179	Chr1:156108458	4000	Chr1:156022546_156200089
ss74833604	rs577492	Chr1:156130948	4000	Chr1:156022546_156200089
ss74813062	rs6701295	Chr1:156178374	4000	Chr1:156022546_156200089
ss74830423	rs2501879	Chr1:161265175	6391	Chr1:161254376_161424751
ss74823044	rs11265582	Chr1:161285543	6391	Chr1:161254376_161424751
ss74823806	rs12065184	Chr1:161308887	6391	Chr1:161254376_161424751
ss74813304	rs4534403	Chr1:161379107	6391	Chr1:161254376_161424751
ss74838397	rs7519821	Chr1:161402818	6391	Chr1:161254376_161424751
ss74843820	rs11802954	Chr1:226303955	142	Chr1:226300691_226468100
ss74848945	rs1813323	Chr1:226313130	142	Chr1:226300691_226468100
ss74808832	rs7527596	Chr1:226438873	142	Chr1:226300691_226468100
ss74810659	rs7549215	Chr1:226438983	142	Chr1:226300691_226468100
ss74832221	rs294185	Chr1:22645399	712	Chr1:22576625_22699682
ss74826346	rs12734877	Chr1:22651390	712	Chr1:22576625_22699682
ss74833712	rs2031749	Chr1:22670886	712	Chr1:22576625_22699682
ss74839347	rs7516258	Chr1:22698640	712	Chr1:22576625_22699682
ss74806169	rs12408890	Chr1:3644444	7161	Chr1:3592565_3796201
ss74815315	rs12032272	Chr1:3698592	7161	Chr1:3592565_3796201
ss74806798	rs1181883	Chr1:3761369	7161	Chr1:3592565_3796201
ss74853674	rs1181874	Chr1:3765506	7161	Chr1:3592565_3796201
ss74822136	rs2284445	Chr1:40234353	10269	Chr1:40198050_40354184
ss74810725	rs10889205	Chr1:40240054	10269	Chr1:40198050_40354184
ss74849696	rs16827106	Chr1:40269800	10269	Chr1:40198050_40354184
ss74838613	rs10489431	Chr1:40293392	10269	Chr1:40198050_40354184
ss74831248	rs781062	Chr1:45467066	5052	Chr1:45451035_45582890
ss74852497	rs2760482	Chr1:58739153	3725	Chr1:58720791_58844113
ss74808745	rs4915691	Chr1:65401836	3953	Chr1:65360652_65697493
ss74840936	rs11208647	Chr1:65407943	3953	Chr1:65360652_65697493
ss74848461	rs9436739	Chr1:65425016	3953	Chr1:65360652_65697493
ss74811691	rs1805094	Chr1:65610269	3953	Chr1:65360652_65697493
ss74811307	rs3747965	Chr1:93877008	2730	Chr1:93827034_93969598
ss74806227	rs11191274	Chr10:102380593	4791	Chr10:102334110_102462529
ss74829094	rs17127145	Chr10:110170603	4601	Chr10:110147605_110347365
ss74818421	rs7074847	Chr10:22386928	648	Chr10:22261210_22391485
ss74849286	rs7069590	Chr10:43057447	5979	Chr10:43017069_43190351
ss74834269	rs2472739	Chr10:43102747	5979	Chr10:43017069_43190351
ss74844938	rs11101340	Chr10:48474359	5599	Chr10:48246639_48499360
ss74824639	rs10857584	Chr10:48496646	5599	Chr10:48246639_48499360
ss74806161	rs2228529	Chr10:49459059	2074	Chr10:49394480_49599123
ss74809099	rs4253211	Chr10:49470271	2074	Chr10:49394480_49599123
ss74810802	rs2228526	Chr10:49470671	2074	Chr10:49394480_49599123
ss74831779	rs3750749	Chr10:49476182	2074	Chr10:49394480_49599123
ss74836112	rs3793786	Chr10:49535042	2074	Chr10:49394480_49599123
ss74829722	rs10821841	Chr10:60797340	983	Chr10:60712976_60854852
ss74852899	rs1240402	Chr10:86982093	6623	Chr10:86897774_87023260
ss74832444	rs11202596	Chr10:87887397	5728	Chr10:87803438_88030345
ss74854311	rs2299939	Chr10:87897393	5728	Chr10:87803438_88030345
ss74830935	rs1234225	Chr10:87913812	5728	Chr10:87803438_88030345
ss74814603	rs12254856	Chr10:88913267	355	Chr10:88909796_89077059
ss74840052	rs11595119	Chr10:88915211	355	Chr10:88909796_89077059
ss74832742	rs12414948	Chr10:88918056	355	Chr10:88909796_89077059
ss74807443	rs11202902	Chr10:88933780	355	Chr10:88909796_89077059
ss74806122	rs1372325	Chr10:88933812	355	Chr10:88909796_89077059
ss74827301	rs3781207	Chr10:88939922	355	Chr10:88909796_89077059
ss74836654	rs17447091	Chr10:88971512	355	Chr10:88909796_89077059
ss74828552	rs3824730	Chr10:88992371	355	Chr10:88909796_89077059
ss74852389	rs2147420	Chr10:88999856	355	Chr10:88909796_89077059
ss74832556	rs7075182	Chr10:94648039	3070	Chr10:94485767_94662871
ss74811775	rs2070661	Chr11:108173261	472	Chr11:108162832_108429102
ss74809965	rs1800057	Chr11:108272729	472	Chr11:108162832_108429102
ss74814234	rs1801516	Chr11:108304735	472	Chr11:108162832_108429102
ss74853381	rs4417316	Chr11:116781585	345	Chr11:116769908_116893071
ss74807088	rs675	Chr11:116820959	345	Chr11:116769908_116893071
ss74816654	rs12225230	Chr11:116857914	345	Chr11:116769908_116893071
ss74830432	rs9919599	Chr11:116874768	345	Chr11:116769908_116893071
ss74851290	rs2045709	Chr11:123002101	3312	Chr11:122997492_123122335
ss74828867	rs9804485	Chr11:123023282	3312	Chr11:122997492_123122335
ss74834378	rs949155	Chr11:123111608	3312	Chr11:122997492_123122335
ss74852745	rs11607961	Chr11:123115548	3312	Chr11:122997492_123122335
ss74825354	rs4757132	Chr11:13246520	406	Chr11:13217734_13447266
ss74831156	rs11022765	Chr11:13323568	406	Chr11:13217734_13447266
ss74850483	rs2290036	Chr11:13358241	406	Chr11:13217734_13447266
ss74808314	rs2280544	Chr11:204062	23410	Chr11:155030_296362
ss74850690	rs7396243	Chr11:2184662	3481	Chr11:2069117_2209603
ss74850690	rs7396243	Chr11:2184662	3630	Chr11:2099779_2221209
ss74842325	rs11246007	Chr11:221584	23410	Chr11:155030_296362
ss74808952	rs11246020	Chr11:233067	23410	Chr11:155030_296362
ss74814609	rs1794108	Chr11:248818	23410	Chr11:155030_296362
ss74852659	rs480575	Chr11:34446099	847	Chr11:34378925_34532060
ss74835398	rs2727270	Chr11:61835765	2237	Chr11:61732637_61857244
ss74823034	rs174589	Chr11:61848331	2237	Chr11:61732637_61857244
ss74816128	rs6856	Chr11:62690803	26580	Chr11:62630262_62769619
ss74823867	rs2170082	Chr11:65687324	5970	Chr11:65593596_65722972
ss74841573	rs4636677	Chr11:65691523	5970	Chr11:65593596_65722972
ss74807111	rs1138272	Chr11:67586108	2950	Chr11:67523595_67646653
ss74812262	rs12421329	Chr11:67605006	2950	Chr11:67523595_67646653
ss74822467	rs12421762	Chr11:67606198	2950	Chr11:67523595_67646653
ss74829801	rs4930210	Chr11:67637255	2950	Chr11:67523595_67646653
ss74839922	rs10793069	Chr11:73958289	7351	Chr11:73914671_74042844
ss74839922	rs10793069	Chr11:73958289	7352	Chr11:73940281_74069237
ss74822427	rs659366	Chr11:73983709	7351	Chr11:73914671_74042844
ss74822427	rs659366	Chr11:73983709	7352	Chr11:73940281_74069237
ss74838320	rs635441	Chr11:73996714	7351	Chr11:73914671_74042844
ss74838320	rs635441	Chr11:73996714	7352	Chr11:73940281_74069237
ss74819188	rs12419308	Chr11:74057508	7352	Chr11:73940281_74069237
ss74829652	rs11066322	Chr12:112484725	5781	Chr12:112358732_112569918
ss74823157	rs904647	Chr12:124314841	9612	Chr12:124264411_124627464
ss74822169	rs8546	Chr12:124324481	9612	Chr12:124264411_124627464
ss74822855	rs12370377	Chr12:124383864	9612	Chr12:124264411_124627464
ss74825654	rs10774223	Chr12:4327466	8074	Chr12:4308227_4439728
ss74853609	rs7962818	Chr12:4354038	8074	Chr12:4308227_4439728
ss74806156	rs7955866	Chr12:4370383	8074	Chr12:4308227_4439728
ss74824971	rs10849051	Chr12:4389241	8074	Chr12:4308227_4439728
ss74845516	rs2249381	Chr12:53473528	6667	Chr12:53320195_53476446
ss74825471	rs17105765	Chr12:53992208	3221	Chr12:53956852_54116030
ss74818012	rs1386016	Chr12:54058491	3221	Chr12:53956852_54116030
ss74833103	rs7296285	Chr12:54061409	3221	Chr12:53956852_54116030
ss74826258	rs1843637	Chr12:54108201	3221	Chr12:53956852_54116030
ss74824648	rs899653	Chr12:57490018	1649	Chr12:57456588_57580517
ss74817386	rs7302230	Chr12:7135836	5830	Chr12:7129163_7278574
ss74839118	rs17791147	Chr12:7137604	5830	Chr12:7129163_7278574
ss74824896	rs1597568	Chr12:7175545	5830	Chr12:7129163_7278574
ss74829524	rs4329748	Chr12:7211846	5830	Chr12:7129163_7278574
ss74826297	rs7969751	Chr12:7218106	5830	Chr12:7129163_7278574
ss74808001	rs2286007	Chr12:862125	5893	Chr12:852089_1050868
ss74806791	rs956868	Chr12:881746	5893	Chr12:852089_1050868
ss74807989	rs669	Chr12:9079672	2	Chr12:9007708_9127900
ss74841904	rs10842914	Chr12:9123182	2	Chr12:9007708_9127900
ss74806787	rs7487683	Chr12:926876	5893	Chr12:852089_1050868
ss74834144	rs11107063	Chr12:93526892	8835	Chr12:93509822_93646288
ss74823286	rs768775	Chr12:93574421	8835	Chr12:93509822_93646288
ss74828907	rs7968701	Chr12:93626791	8835	Chr12:93509822_93646288
ss74841905	rs10735067	Chr12:963224	5893	Chr12:852089_1050868
ss74831740	rs7971382	Chr12:969963	5893	Chr12:852089_1050868
ss74833087	rs9514039	Chr13:102677662	7174	Chr13:102536936_102739174
ss74838796	rs7981120	Chr13:102694309	7174	Chr13:102536936_102739174
ss74823508	rs9557916	Chr13:102700263	7174	Chr13:102536936_102739174
ss74812243	rs1571070	Chr13:102722027	7174	Chr13:102536936_102739174
ss74819611	rs9554897	Chr13:102731067	7174	Chr13:102536936_102739174
ss74818656	rs17507827	Chr13:102732362	7174	Chr13:102536936_102739174
ss74813853	rs9300756	Chr13:102732474	7174	Chr13:102536936_102739174
ss74818384	rs17592438	Chr13:102733184	7174	Chr13:102536936_102739174
ss74816892	rs17507841	Chr13:102735665	7174	Chr13:102536936_102739174
ss74811078	rs9518825	Chr13:102736020	7174	Chr13:102536936_102739174
ss74819043	rs17592459	Chr13:102736530	7174	Chr13:102536936_102739174
ss74813863	rs1047769	Chr13:102861594	2073	Chr13:102785841_102936001
ss74840849	rs4150355	Chr13:102870962	2073	Chr13:102785841_102936001
ss74821696	rs4150360	Chr13:102872412	2073	Chr13:102785841_102936001
ss74811238	rs17655	Chr13:102875652	2073	Chr13:102785841_102936001
ss74833358	rs876430	Chr13:102876934	2073	Chr13:102785841_102936001
ss74853616	rs9518861	Chr13:102889266	2073	Chr13:102785841_102936001
ss74824404	rs9586007	Chr13:102902280	2073	Chr13:102785841_102936001
ss74843912	rs11843936	Chr13:109746779	8660	Chr13:109693837_109846567
ss74845258	rs9515118	Chr13:109749199	8660	Chr13:109693837_109846567
ss74839982	rs4771644	Chr13:109761470	8660	Chr13:109693837_109846567
ss74829487	rs12584136	Chr13:109767007	8660	Chr13:109693837_109846567
ss74851590	rs11841502	Chr13:109775641	8660	Chr13:109693837_109846567
ss74833309	rs7997595	Chr13:109778421	8660	Chr13:109693837_109846567
ss74836196	rs4773094	Chr13:109789136	8660	Chr13:109693837_109846567
ss74827374	rs12429603	Chr13:109805076	8660	Chr13:109693837_109846567
ss74830473	rs6577059	Chr13:113646377	7027	Chr13:113524688_113701473
ss74837273	rs7982957	Chr13:28335733	2321	Chr13:28240346_28555128
ss74851443	rs9508019	Chr13:28364797	2321	Chr13:28240346_28555128
ss74853580	rs4771246	Chr13:28388805	2321	Chr13:28240346_28555128
ss74845312	rs9513116	Chr13:28442578	2321	Chr13:28240346_28555128
ss74829852	rs2892547	Chr13:30469338	3146	Chr13:30398740_30525944
ss74853013	rs9578178	Chr13:30495833	3146	Chr13:30398740_30525944
ss74834737	rs17074679	Chr13:30510562	3146	Chr13:30398740_30525944
ss74844096	rs2806635	Chr13:32257506	675	Chr13:32255480_32459672
ss74840667	rs2013080	Chr13:32300097	675	Chr13:32255480_32459672
ss74849229	rs9534156	Chr13:32312437	675	Chr13:32255480_32459672
ss74811272	rs766173	Chr13:32332343	675	Chr13:32255480_32459672
ss74810222	rs144848	Chr13:32332592	675	Chr13:32255480_32459672
ss74852338	rs4942485	Chr13:32379045	675	Chr13:32255480_32459672
ss74844918	rs17692629	Chr13:32402471	675	Chr13:32255480_32459672
ss74810218	rs3752448	Chr13:32407142	675	Chr13:32255480_32459672
ss74820753	rs17077568	Chr13:32442523	675	Chr13:32255480_32459672
ss74811270	rs3742318	Chr13:32442906	675	Chr13:32255480_32459672
ss74820896	rs17077569	Chr13:32443021	675	Chr13:32255480_32459672
ss74830949	rs3904629	Chr13:32956713	9365	Chr13:32956063_33126145
ss74825273	rs565093	Chr13:32960020	9365	Chr13:32956063_33126145
ss74852852	rs9526983	Chr13:33035145	9365	Chr13:32956063_33126145
ss74811304	rs9536314	Chr13:33054001	9365	Chr13:32956063_33126145
ss74809229	rs9527025	Chr13:33054056	9365	Chr13:32956063_33126145
ss74812649	rs515192	Chr13:33102435	9365	Chr13:32956063_33126145
ss74835310	rs11617752	Chr13:33106095	9365	Chr13:32956063_33126145
ss74851051	rs12865518	Chr13:40569053	2308	Chr13:40495664_40726597
ss74824791	rs1190592	Chr14:102134432	3320	Chr14:102020738_102199749
ss74819184	rs10083536	Chr14:20408030	328	Chr14:20395131_20517772
ss74808053	rs1760897	Chr14:20408094	328	Chr14:20395131_20517772
ss74814353	rs7145318	Chr14:20428905	328	Chr14:20395131_20517772
ss74814414	rs17242648	Chr14:20430149	328	Chr14:20395131_20517772
ss74851721	rs12883097	Chr14:20432096	328	Chr14:20395131_20517772
ss74815874	rs7150924	Chr14:20437886	328	Chr14:20395131_20517772
ss74817331	rs8003245	Chr14:20439395	328	Chr14:20395131_20517772
ss74814958	rs12050102	Chr14:20442073	328	Chr14:20395131_20517772
ss74828891	rs2275008	Chr14:20448090	328	Chr14:20395131_20517772
ss74807348	rs1048945	Chr14:20456008	328	Chr14:20395131_20517772
ss74809627	rs1130409	Chr14:20456995	328	Chr14:20395131_20517772
ss74823058	rs1049562	Chr14:20472356	328	Chr14:20395131_20517772
ss74838978	rs7146340	Chr14:20517275	328	Chr14:20395131_20517772
ss74829444	rs11621511	Chr14:35430708	4792	Chr14:35341510_35464754
ss74827939	rs17758399	Chr14:35432355	4792	Chr14:35341510_35464754
ss74826117	rs13313403	Chr14:35440014	4792	Chr14:35341510_35464754
ss74853780	rs710035	Chr14:61671246	3091	Chr14:61635401_61808259
ss74845434	rs1957757	Chr14:61730230	3091	Chr14:61635401_61808259
ss74818184	rs11549465	Chr14:61740839	3091	Chr14:61635401_61808259
ss74851822	rs12588378	Chr14:65057282	4149	Chr14:64946101_65162695
ss74841407	rs3025780	Chr14:73167758	5663	Chr14:73076435_73283691
ss74851751	rs7152131	Chr14:73190472	5663	Chr14:73076435_73283691
ss74840681	rs214260	Chr14:73195921	5663	Chr14:73076435_73283691
ss74837593	rs165933	Chr14:73198646	5663	Chr14:73076435_73283691
ss74837589	rs3742825	Chr14:73238768	5663	Chr14:73076435_73283691
ss74814334	rs2242609	Chr14:73245595	5663	Chr14:73076435_73283691
ss74826010	rs6574115	Chr14:73257387	5663	Chr14:73076435_73283691
ss74812228	rs4903104	Chr14:73268658	5663	Chr14:73076435_73283691
ss74806659	rs3742769	Chr14:75292182	2353	Chr14:75218778_75342234
ss74836216	rs11847466	Chr14:75340908	2353	Chr14:75218778_75342234
ss74809031	rs1801376	Chr15:40185630	701	Chr15:40101009_40281136
ss74822438	rs12905386	Chr15:40270439	701	Chr15:40101009_40281136
ss74811773	rs2412544	Chr15:40657328	5888	Chr15:40635129_40792158
ss74837012	rs2412545	Chr15:40687453	5888	Chr15:40635129_40792158
ss74837665	rs2304579	Chr15:40698955	5888	Chr15:40635129_40792158
ss74851268	rs13380176	Chr15:40777801	5888	Chr15:40635129_40792158
ss74818655	rs3917221	Chr15:43366737	7158	Chr15:43347214_43570509
ss74807867	rs3809482	Chr15:43369604	7158	Chr15:43347214_43570509
ss74810907	rs689647	Chr15:43469998	7158	Chr15:43347214_43570509
ss74809567	rs560191	Chr15:43475576	7158	Chr15:43347214_43570509
ss74831537	rs10152173	Chr15:73960067	5371	Chr15:73934673_74107819
ss74826686	rs4993000	Chr15:73990002	5371	Chr15:73934673_74107819
ss74853601	rs7166852	Chr15:75319309	79661	Chr15:75286990_75415251
ss74853601	rs7166852	Chr15:75319309	25942	Chr15:75309379_75515815
ss74811414	rs2283432	Chr15:89292997	5428	Chr15:89256305_89394795
ss74814070	rs2227935	Chr15:90782869	641	Chr15:90657327_90875462
ss74822412	rs2238337	Chr15:90812502	641	Chr15:90657327_90875462
ss74825826	rs17183763	Chr15:90822900	641	Chr15:90657327_90875462
ss74832470	rs4932370	Chr15:90861475	641	Chr15:90657327_90875462
ss74832806	rs1319859	Chr15:98687034	3480	Chr15:98589047_99024530
ss74844558	rs1007212	Chr15:98740689	3480	Chr15:98589047_99024530
ss74854582	rs4966022	Chr15:98743055	3480	Chr15:98589047_99024530
ss74836650	rs10794486	Chr15:98758306	3480	Chr15:98589047_99024530
ss74843760	rs7175387	Chr15:98764865	3480	Chr15:98589047_99024530
ss74824355	rs11634874	Chr15:98818034	3480	Chr15:98589047_99024530
ss74823706	rs8030950	Chr15:98860792	3480	Chr15:98589047_99024530
ss74823014	rs2684787	Chr15:98961833	3480	Chr15:98589047_99024530
ss74826099	rs1061621	Chr16:1326891	7329	Chr16:1249153_1387018
ss74809470	rs1800067	Chr16:13935176	2072	Chr16:13860157_14012348
ss74845232	rs9937539	Chr16:19022670	10229	Chr16:19007595_19140095
ss74810433	rs28583298	Chr16:19030273	10229	Chr16:19007595_19140095
ss74814526	rs11074362	Chr16:19116025	10229	Chr16:19007595_19140095
ss74851074	rs12444804	Chr16:3673247	1387	Chr16:3665054_3940120
ss74832355	rs1635404	Chr16:3697041	1387	Chr16:3665054_3940120
ss74813434	rs666636	Chr16:56567808	4493	Chr16:56565654_56687112
ss74829691	rs8062645	Chr16:56572226	4493	Chr16:56565654_56687112
ss74828171	rs1811322	Chr16:56605793	4493	Chr16:56565654_56687112
ss74814842	rs11076159	Chr16:56636915	4493	Chr16:56565654_56687112
ss74833319	rs9927820	Chr16:56914706	1071	Chr16:56901923_57043844
ss74808978	rs2217332	Chr16:56935236	1071	Chr16:56901923_57043844
ss74824539	rs3764261	Chr16:56959412	1071	Chr16:56901923_57043844
ss74848920	rs11508026	Chr16:56965416	1071	Chr16:56901923_57043844
ss74834538	rs4784745	Chr16:56980963	1071	Chr16:56901923_57043844
ss74819976	rs1800777	Chr16:56983407	1071	Chr16:56901923_57043844
ss74832125	rs11642606	Chr16:57017242	1071	Chr16:56901923_57043844
ss74838337	rs13335668	Chr16:57018818	1071	Chr16:56901923_57043844
ss74815650	rs16965150	Chr16:57025572	1071	Chr16:56901923_57043844
ss74822134	rs1125156	Chr17:16091240	9611	Chr17:15970094_16275560
ss74849761	rs3112518	Chr17:16340194	7314	Chr17:16320793_16442745
ss74825807	rs7217735	Chr17:16412605	7314	Chr17:16320793_16442745
ss74819252	rs9913923	Chr17:1800688	6117	Chr17:1769979_1959554
ss74826856	rs4790830	Chr17:1851086	6117	Chr17:1769979_1959554
ss74820757	rs11656253	Chr17:1858152	6117	Chr17:1769979_1959554
ss74839306	rs2277694	Chr17:1880518	6117	Chr17:1769979_1959554
ss74838580	rs12727	Chr17:1897771	6117	Chr17:1769979_1959554
ss74823076	rs4790849	Chr17:1956248	6117	Chr17:1769979_1959554
ss74812215	rs5641	Chr17:39670190	2064	Chr17:39628140_39788662
ss74822207	rs3169906	Chr17:40476509	7153	Chr17:40328521_40477950
ss74806043	rs1799966	Chr17:43071077	672	Chr17:42984295_43185483
ss74806494	rs16942	Chr17:43091983	672	Chr17:42984295_43185483
ss74808914	rs799917	Chr17:43092919	672	Chr17:42984295_43185483
ss74813635	rs4986850	Chr17:43093454	672	Chr17:42984295_43185483
ss74809653	rs1799950	Chr17:43094464	672	Chr17:42984295_43185483
ss74813428	rs11657835	Chr17:43139936	672	Chr17:42984295_43185483
ss74818528	rs936018	Chr17:44398594	2896	Chr17:44285123_44413106
ss74841498	rs4792825	Chr17:45842315	4137	Chr17:45834336_46088334
ss74815739	rs17763658	Chr17:45845274	4137	Chr17:45834336_46088334
ss74854045	rs4792890	Chr17:45857021	4137	Chr17:45834336_46088334
ss74815898	rs17651549	Chr17:45983912	4137	Chr17:45834336_46088334
ss74812688	rs2258689	Chr17:45990016	4137	Chr17:45834336_46088334
ss74812308	rs10445337	Chr17:45990034	4137	Chr17:45834336_46088334
ss74811932	rs7220988	Chr17:46032108	4137	Chr17:45834336_46088334
ss74822976	rs9900373	Chr17:49435583	4804	Chr17:49435293_49575020
ss74840168	rs2671686	Chr17:49487883	4804	Chr17:49435293_49575020
ss74806013	rs2072446	Chr17:49510457	4804	Chr17:49435293_49575020
ss74807232	rs2727288	Chr17:63823837	1443	Chr17:63812012_63933729
ss74808517	rs2584625	Chr17:63826085	1443	Chr17:63812012_63933729
ss74825716	rs2070776	Chr17:63930138	1443	Chr17:63812012_63933729
ss74825716	rs2070776	Chr17:63930138	1444	Chr17:63849605_63971258
ss74825716	rs2070776	Chr17:63930138	2688	Chr17:63857200_63978838
ss74807881	rs2058194	Chr17:63942988	1444	Chr17:63849605_63971258
ss74807881	rs2058194	Chr17:63942988	2688	Chr17:63857200_63978838
ss74827106	rs8080613	Chr17:63952871	1444	Chr17:63849605_63971258
ss74827106	rs8080613	Chr17:63952871	2688	Chr17:63857200_63978838
ss74823782	rs6504192	Chr17:63977670	2688	Chr17:63857200_63978838
ss74829065	rs7342920	Chr17:66248527	5578	Chr17:66242642_66870744
ss74847879	rs1558358	Chr17:66274318	5578	Chr17:66242642_66870744
ss74838606	rs16959569	Chr17:66540941	5578	Chr17:66242642_66870744
ss74854318	rs4791049	Chr17:66545594	5578	Chr17:66242642_66870744
ss74824583	rs7207146	Chr17:66568936	5578	Chr17:66242642_66870744
ss74845213	rs8067797	Chr17:66572862	5578	Chr17:66242642_66870744
ss74829229	rs16969771	Chr17:66580556	5578	Chr17:66242642_66870744
ss74838446	rs17686310	Chr17:66609386	5578	Chr17:66242642_66870744
ss74842556	rs4790907	Chr17:66660373	5578	Chr17:66242642_66870744
ss74848176	rs16959906	Chr17:66663429	5578	Chr17:66242642_66870744
ss74845090	rs715219	Chr17:66695548	5578	Chr17:66242642_66870744
ss74841784	rs759117	Chr17:66705505	5578	Chr17:66242642_66870744
ss74843346	rs16960110	Chr17:66716714	5578	Chr17:66242642_66870744
ss74834012	rs7215972	Chr17:66728496	5578	Chr17:66242642_66870744
ss74823350	rs9904322	Chr17:66731604	5578	Chr17:66242642_66870744
ss74835005	rs12451026	Chr17:66737444	5578	Chr17:66242642_66870744
ss74815394	rs2286674	Chr17:66804434	5578	Chr17:66242642_66870744
ss74822202	rs3744231	Chr17:75272720	2885	Chr17:75258076_75465709
ss74823810	rs4542691	Chr17:75330884	2885	Chr17:75258076_75465709
ss74805906	rs13894	Chr17:7626584	7157	Chr17:7608402_7747550
ss74826843	rs6259	Chr17:7633209	7157	Chr17:7608402_7747550
ss74843932	rs2287497	Chr17:7689462	7157	Chr17:7608402_7747550
ss74825162	rs4987825	Chr18:63145280	596	Chr18:63063346_63379778
ss74847743	rs6567328	Chr18:63176856	596	Chr18:63063346_63379778
ss74854082	rs2849377	Chr18:63304411	596	Chr18:63063346_63379778
ss74839801	rs10460157	Chr18:63305485	596	Chr18:63063346_63379778
ss74852213	rs2551402	Chr18:63322789	596	Chr18:63063346_63379778
ss74817808	rs4147918	Chr19:1058177	2879	Chr19:1043937_1166788
ss74828658	rs757232	Chr19:1075980	2879	Chr19:1043937_1166788
ss74817110	rs3969860	Chr19:11337210	2057	Chr19:11317205_11444342
ss74846770	rs7251786	Chr19:11354453	2057	Chr19:11317205_11444342
ss74822356	rs317913	Chr19:11399638	2057	Chr19:11317205_11444342
ss74812168	rs2043289	Chr19:13158367	773	Chr19:13146442_13566460
ss74847599	rs4926252	Chr19:13273317	773	Chr19:13146442_13566460
ss74811892	rs16027	Chr19:13286746	773	Chr19:13146442_13566460
ss74838757	rs10854124	Chr19:13370974	773	Chr19:13146442_13566460
ss74833351	rs933649	Chr19:13447093	773	Chr19:13146442_13566460
ss74831833	rs1862263	Chr19:13453770	773	Chr19:13146442_13566460
ss74847353	rs6511867	Chr19:13474990	773	Chr19:13146442_13566460
ss74832646	rs10409667	Chr19:1638920	6929	Chr19:1549290_1712334
ss74834336	rs4807942	Chr19:1642508	6929	Chr19:1549290_1712334
ss74824622	rs172043	Chr19:18240864	3727	Chr19:18219694_18341656
ss74812284	rs2287657	Chr19:18250416	3727	Chr19:18219694_18341656
ss74806105	rs999813	Chr19:18258000	3727	Chr19:18219694_18341656
ss74816416	rs3810434	Chr19:18258401	3727	Chr19:18219694_18341656
ss74819984	rs3810433	Chr19:18258460	3727	Chr19:18219694_18341656
ss74815750	rs8109771	Chr19:18262110	3727	Chr19:18219694_18341656
ss74816615	rs11671617	Chr19:18262360	3727	Chr19:18219694_18341656
ss74818335	rs12609001	Chr19:18266951	3727	Chr19:18219694_18341656
ss74830316	rs1549142	Chr19:18272984	3727	Chr19:18219694_18341656
ss74828620	rs12610763	Chr19:33350705	1050	Chr19:33239934_33362564
ss74806706	rs1110627	Chr19:39504071	10683	Chr19:39438917_39568481
ss74823143	rs8108097	Chr19:39555446	10683	Chr19:39438917_39568481
ss74826340	rs8113281	Chr19:3966134	1938	Chr19:3916056_4045463
ss74826573	rs1008076	Chr19:3968607	1938	Chr19:3916056_4045463
ss74823021	rs2028827	Chr19:4024022	1938	Chr19:3916056_4045463
ss74854628	rs350887	Chr19:4119014	51548	Chr19:4114109_4242599
ss74807493	rs10853751	Chr19:41397315	7040	Chr19:41270531_41413933
ss74844411	rs12974011	Chr19:4141242	51548	Chr19:4114109_4242599
ss74807315	rs352493	Chr19:4180839	51548	Chr19:4114109_4242599
ss74843583	rs519825	Chr19:44863522	348	Chr19:44845782_44969393
ss74838357	rs3760627	Chr19:44953923	348	Chr19:44845782_44969393
ss74815818	rs12973246	Chr19:45332946	2068	Chr19:45291391_45430587
ss74814434	rs12973496	Chr19:45333055	2068	Chr19:45291391_45430587
ss74823882	rs3815409	Chr19:45525914	2067	Chr19:45347333_45538837
ss74825833	rs838147	Chr19:48743609	26291	Chr19:48695559_48818330
ss74807672	rs2071699	Chr19:48751247	26291	Chr19:48695559_48818330
ss74826971	rs736170	Chr19:48809743	26291	Chr19:48695559_48818330
ss74842864	rs2098684	Chr19:48817750	26291	Chr19:48695559_48818330
ss74806253	rs2270941	Chr19:48935106	581	Chr19:48894860_49021798
ss74806252	rs11666105	Chr19:48942560	581	Chr19:48894860_49021798
ss74809162	rs3765148	Chr19:48944456	581	Chr19:48894860_49021798
ss74826239	rs3764621	Chr19:49003073	581	Chr19:48894860_49021798
ss74815967	rs25665	Chr19:50454140	5424	Chr19:50324278_50478018
ss74820180	rs25667	Chr19:50464383	5424	Chr19:50324278_50478018
ss74852683	rs2967646	Chr19:7074550	3643	Chr19:7052255_7354328
ss74849730	rs2914567	Chr19:7078310	3643	Chr19:7052255_7354328
ss74851350	rs6510949	Chr19:7134391	3643	Chr19:7052255_7354328
ss74826037	rs3786680	Chr19:7183540	3643	Chr19:7052255_7354328
ss74834978	rs17253937	Chr19:7184790	3643	Chr19:7052255_7354328
ss74852822	rs10413734	Chr19:7227860	3643	Chr19:7052255_7354328
ss74854991	rs10408844	Chr19:7244873	3643	Chr19:7052255_7354328
ss74842441	rs11668751	Chr19:7251831	3643	Chr19:7052255_7354328
ss74846861	rs7246772	Chr19:9775607	5300	Chr19:9775207_9909689
ss74840885	rs4804469	Chr19:9878276	5300	Chr19:9775207_9909689
ss74843516	rs7245579	Chr19:9890200	5300	Chr19:9775207_9909689
ss74814745	rs2276583	Chr2:127257108	2071	Chr2:127197290_127354176
ss74808937	rs3732209	Chr2:127322230	2071	Chr2:127197290_127354176
ss74851100	rs1257179	Chr2:134220954	4249	Chr2:134059935_134514621
ss74828801	rs4954119	Chr2:134238613	4249	Chr2:134059935_134514621
ss74846507	rs6714520	Chr2:134384651	4249	Chr2:134059935_134514621
ss74833876	rs12997281	Chr2:134404060	4249	Chr2:134059935_134514621
ss74853206	rs524900	Chr2:134501074	4249	Chr2:134059935_134514621
ss74812768	rs4667591	Chr2:169146922	4036	Chr2:169067109_169422613
ss74809534	rs2075252	Chr2:169154475	4036	Chr2:169067109_169422613
ss74806557	rs2228171	Chr2:169196995	4036	Chr2:169067109_169422613
ss74823026	rs12987817	Chr2:169236786	4036	Chr2:169067109_169422613
ss74829545	rs831007	Chr2:169281996	4036	Chr2:169067109_169422613
ss74835358	rs831016	Chr2:169286682	4036	Chr2:169067109_169422613
ss74833626	rs830966	Chr2:169302478	4036	Chr2:169067109_169422613
ss74807134	rs2229263	Chr2:169318824	4036	Chr2:169067109_169422613
ss74826421	rs3729573	Chr2:169347350	4036	Chr2:169067109_169422613
ss74828961	rs2389557	Chr2:169354867	4036	Chr2:169067109_169422613
ss74847061	rs13016051	Chr2:175036640	1386	Chr2:175012250_175228206
ss74825978	rs6714212	Chr2:202192264	7341	Chr2:202146180_202298599
ss74842462	rs6709162	Chr2:202233836	7341	Chr2:202146180_202298599
ss74849325	rs10932196	Chr2:207471880	1385	Chr2:207469892_207665560
ss74853006	rs10490595	Chr2:207481686	1385	Chr2:207469892_207665560
ss74829170	rs17520056	Chr2:207613331	1385	Chr2:207469892_207665560
ss74832167	rs2551941	Chr2:207627419	1385	Chr2:207469892_207665560
ss74807128	rs2372536	Chr2:215325297	2335	Chr2:215300454_215496167
ss74850320	rs10498036	Chr2:215349769	2335	Chr2:215300454_215496167
ss74817170	rs17449032	Chr2:215371989	2335	Chr2:215300454_215496167
ss74850561	rs17516906	Chr2:215414550	2335	Chr2:215300454_215496167
ss74843464	rs7567258	Chr2:216092206	7520	Chr2:216047658_216266293
ss74843920	rs828923	Chr2:216094507	7520	Chr2:216047658_216266293
ss74825453	rs1805382	Chr2:216130868	7520	Chr2:216047658_216266293
ss74853476	rs3770507	Chr2:216166955	7520	Chr2:216047658_216266293
ss74825823	rs2111959	Chr2:216174341	7520	Chr2:216047658_216266293
ss74815171	rs17495945	Chr2:216610812	3485	Chr2:216573404_216724436
ss74807779	rs11575194	Chr2:216679005	3485	Chr2:216573404_216724436
ss74823603	rs1978346	Chr2:216696744	3485	Chr2:216573404_216724436
ss74852792	rs9808108	Chr2:226690632	3667	Chr2:226671317_226859829
ss74807208	rs1126497	Chr2:47373967	4436	Chr2:47343067_47572577
ss74854240	rs10183143	Chr2:47466898	4436	Chr2:47343067_47572577
ss74829216	rs727877	Chr2:55892375	2202	Chr2:55805962_55984163
ss74825880	rs4258837	Chr2:55952149	2202	Chr2:55805962_55984163
ss74841509	rs1986601	Chr2:69980371	4084	Chr2:69855041_70002945
ss74807782	rs6707475	Chr2:74483364	27429	Chr2:74469405_74593556
ss74818017	rs3755447	Chr2:74513067	27429	Chr2:74469405_74593556
ss74819573	rs17010021	Chr2:74534412	27429	Chr2:74469405_74593556
ss74850629	rs2076399	Chr20:37198280	2691	Chr20:37191086_37316896
ss74832507	rs17179419	Chr20:41120601	7150	Chr20:40968822_41184487
ss74806596	rs2228246	Chr20:41163423	7150	Chr20:40968822_41184487
ss74824273	rs1967439	Chr20:50464746	5770	Chr20:50450321_50644762
ss74843919	rs6095962	Chr20:50470913	5770	Chr20:50450321_50644762
ss74828957	rs1997791	Chr20:50479891	5770	Chr20:50450321_50644762
ss74828513	rs2426158	Chr20:50535747	5770	Chr20:50450321_50644762
ss74808966	rs6091179	Chr20:50594774	5770	Chr20:50450321_50644762
ss74842368	rs13037493	Chr20:57297833	8480	Chr20:57291089_57438463
ss74823520	rs11546710	Chr20:57408017	8480	Chr20:57291089_57438463
ss74807817	rs6025606	Chr20:57523677	5105	Chr20:57501081_57626459
ss74838956	rs2902993	Chr20:57535158	5105	Chr20:57501081_57626459
ss74848257	rs728064	Chr20:57544076	5105	Chr20:57501081_57626459
ss74835108	rs6025617	Chr20:57546732	5105	Chr20:57501081_57626459
ss74825689	rs6092495	Chr20:57550973	5105	Chr20:57501081_57626459
ss74836020	rs2071023	Chr20:57560878	5105	Chr20:57501081_57626459
ss74805923	rs707555	Chr20:57562839	5105	Chr20:57501081_57626459
ss74817863	rs11552145	Chr20:57563592	5105	Chr20:57501081_57626459
ss74807815	rs1804160	Chr20:57564309	5105	Chr20:57501081_57626459
ss74810931	rs4811888	Chr20:57607127	5105	Chr20:57501081_57626459
ss74821242	rs6123711	Chr20:57607240	5105	Chr20:57501081_57626459
ss74807168	rs2073145	Chr20:57615578	5105	Chr20:57501081_57626459
ss74836579	rs6070187	Chr20:57623588	5105	Chr20:57501081_57626459
ss74829903	rs2829916	Chr21:25822558	351	Chr21:25820550_26231128
ss74841291	rs380417	Chr21:25899847	351	Chr21:25820550_26231128
ss74838730	rs2211771	Chr21:26027083	351	Chr21:25820550_26231128
ss74825523	rs768039	Chr21:26035705	351	Chr21:25820550_26231128
ss74850232	rs2830036	Chr21:26063209	351	Chr21:25820550_26231128
ss74822715	rs380713	Chr21:26182129	351	Chr21:25820550_26231128
ss74823240	rs464884	Chr21:26195312	351	Chr21:25820550_26231128
ss74844704	rs456514	Chr21:26196615	351	Chr21:25820550_26231128
ss74837679	rs458358	Chr21:26208964	351	Chr21:25820550_26231128
ss74833053	rs1008270	Chr21:31629832	6647	Chr21:31599622_31728931
ss74815391	rs743314	Chr21:33855751	539	Chr21:33843453_33975854
ss74850564	rs2834280	Chr21:33856198	539	Chr21:33843453_33975854
ss74839686	rs1109850	Chr21:33857589	539	Chr21:33843453_33975854
ss74845399	rs1475848	Chr21:33861213	539	Chr21:33843453_33975854
ss74823363	rs2268257	Chr21:33864163	539	Chr21:33843453_33975854
ss74843374	rs3761353	Chr21:33899569	539	Chr21:33843453_33975854
ss74813364	rs8130507	Chr21:33931656	539	Chr21:33843453_33975854
ss74812023	rs766425	Chr21:33962264	539	Chr21:33843453_33975854
ss74852875	rs1981331	Chr21:46575530	6285	Chr21:46538618_46665122
ss74827661	rs7276092	Chr21:46643823	6285	Chr21:46538618_46665122
ss74806321	rs2070507	Chr22:21923198	8940	Chr22:21895493_22042843
ss74817929	rs9610645	Chr22:21934188	8940	Chr22:21895493_22042843
ss74836835	rs11705283	Chr22:21984802	8940	Chr22:21895493_22042843
ss74818179	rs238775	Chr22:21994691	8940	Chr22:21895493_22042843
ss74833652	rs1016547	Chr22:22000971	8940	Chr22:21895493_22042843
ss74807049	rs1128127	Chr22:23836945	4282	Chr22:23834378_23955222
ss74824051	rs6003911	Chr22:23843412	4282	Chr22:23834378_23955222
ss74815219	rs16986337	Chr22:23857517	4282	Chr22:23834378_23955222
ss74839510	rs5996631	Chr22:23914707	4282	Chr22:23834378_23955222
ss74807048	rs5996633	Chr22:23928398	4282	Chr22:23834378_23955222
ss74830760	rs5762734	Chr22:28650252	11200	Chr22:28627743_28801834
ss74846239	rs12167378	Chr22:28704901	11200	Chr22:28627743_28801834
ss74840271	rs4821595	Chr22:37179937	6753	Chr22:37144237_37280438
ss74809253	rs229526	Chr22:37185382	6753	Chr22:37144237_37280438
ss74825055	rs4821605	Chr22:37220050	6753	Chr22:37144237_37280438
ss74841653	rs12170612	Chr22:37236140	6753	Chr22:37144237_37280438
ss74822550	rs13058338	Chr22:37236730	6753	Chr22:37144237_37280438
ss74828963	rs6000634	Chr22:37251532	6753	Chr22:37144237_37280438
ss74823828	rs7288979	Chr22:37253454	6753	Chr22:37144237_37280438
ss74823877	rs9610695	Chr22:37262659	6753	Chr22:37144237_37280438
ss74825747	rs135711	Chr22:38262571	1454	Chr22:38230691_38378084
ss74840122	rs738470	Chr22:39185272	5155	Chr22:39163680_39304952
ss74824285	rs5995990	Chr22:41066726	2033	Chr22:41032302_41240083
ss74822619	rs7510675	Chr22:41153293	2033	Chr22:41032302_41240083
ss74835167	rs2057070	Chr22:41168283	2033	Chr22:41032302_41240083
ss74823108	rs910923	Chr22:46092022	5465	Chr22:46090562_46303756
ss74829243	rs135551	Chr22:46157126	5465	Chr22:46090562_46303756
ss74852235	rs129600	Chr22:46161262	5465	Chr22:46090562_46303756
ss74841134	rs9626730	Chr22:46166284	5465	Chr22:46090562_46303756
ss74831750	rs8138102	Chr22:46195855	5465	Chr22:46090562_46303756
ss74808099	rs7291444	Chr22:46260349	5465	Chr22:46090562_46303756
ss74811498	rs6519993	Chr22:46260582	5465	Chr22:46090562_46303756
ss74829919	rs2461823	Chr3:119801278	2932	Chr3:119761321_120154417
ss74853088	rs6438549	Chr3:119804899	2932	Chr3:119761321_120154417
ss74841944	rs13320980	Chr3:119890313	2932	Chr3:119761321_120154417
ss74836748	rs4688054	Chr3:120014863	2932	Chr3:119761321_120154417
ss74851252	rs11919783	Chr3:120027786	2932	Chr3:119761321_120154417
ss74818714	rs9853146	Chr3:12257814	5468	Chr3:12227850_12494356
ss74831178	rs3934729	Chr3:123300916	111	Chr3:123222296_123509077
ss74823636	rs2877716	Chr3:123375604	111	Chr3:123222296_123509077
ss74831947	rs13074111	Chr3:123454272	111	Chr3:123222296_123509077
ss74841986	rs13099828	Chr3:12427090	5468	Chr3:12227850_12494356
ss74811214	rs641320	Chr3:138629115	5291	Chr3:138592698_138894938
ss74848270	rs10513055	Chr3:138732510	5291	Chr3:138592698_138894938
ss74811810	rs2227928	Chr3:142562770	545	Chr3:142389235_142638826
ss74827341	rs9816377	Chr3:142638381	545	Chr3:142389235_142638826
ss74811430	rs10936600	Chr3:169796797	7012	Chr3:169704610_169825060
ss74811429	rs6793295	Chr3:169800667	7012	Chr3:169704610_169825060
ss74850078	rs1399499	Chr3:170863536	56648	Chr3:170828415_170968637
ss74816309	rs13059911	Chr3:170953033	56648	Chr3:170828415_170968637
ss74807536	rs7642480	Chr3:170953520	56648	Chr3:170828415_170968637
ss74818366	rs7628878	Chr3:170953640	56648	Chr3:170828415_170968637
ss74838123	rs4855094	Chr3:179160189	5290	Chr3:179088114_179295137
ss74821192	rs2230461	Chr3:179209622	5290	Chr3:179088114_179295137
ss74811894	rs7645550	Chr3:179250846	5290	Chr3:179088114_179295137
ss74848630	rs10804876	Chr3:179257620	5290	Chr3:179088114_179295137
ss74853038	rs9831515	Chr3:189592116	8626	Chr3:189571160_189957279
ss74829762	rs2378510	Chr3:189682493	8626	Chr3:189571160_189957279
ss74848314	rs12489218	Chr3:189682807	8626	Chr3:189571160_189957279
ss74845428	rs12696596	Chr3:189699198	8626	Chr3:189571160_189957279
ss74841181	rs4429607	Chr3:189736462	8626	Chr3:189571160_189957279
ss74836316	rs13075375	Chr3:189816794	8626	Chr3:189571160_189957279
ss74854600	rs4687097	Chr3:189822567	8626	Chr3:189571160_189957279
ss74832317	rs2037128	Chr3:189831073	8626	Chr3:189571160_189957279
ss74854483	rs7619370	Chr3:189834372	8626	Chr3:189571160_189957279
ss74828258	rs9817981	Chr3:189845741	8626	Chr3:189571160_189957279
ss74842754	rs2176085	Chr3:189852567	8626	Chr3:189571160_189957279
ss74844493	rs11719667	Chr3:189854879	8626	Chr3:189571160_189957279
ss74837209	rs4681067	Chr3:25561399	7155	Chr3:25537905_25724905
ss74826058	rs17029657	Chr3:25561941	7155	Chr3:25537905_25724905
ss74832861	rs1286729	Chr3:25567085	7155	Chr3:25537905_25724905
ss74824011	rs17526942	Chr3:25575912	7155	Chr3:25537905_25724905
ss74826965	rs9809535	Chr3:25584330	7155	Chr3:25537905_25724905
ss74826423	rs6799331	Chr3:25662149	7155	Chr3:25537905_25724905
ss74818935	rs1799977	Chr3:37012077	4292	Chr3:36933350_37110846
ss74853256	rs1560333	Chr3:53104238	5580	Chr3:53101207_53252717
ss74828537	rs6778964	Chr3:53174766	5580	Chr3:53101207_53252717
ss74830946	rs7650103	Chr3:53226309	5580	Chr3:53101207_53252717
ss74833227	rs3773747	Chr3:53238298	5580	Chr3:53101207_53252717
ss74836584	rs300984	Chr3:87296492	5449	Chr3:87199633_87336587
ss74845838	rs12492392	Chr3:87301270	5449	Chr3:87199633_87336587
ss74843369	rs7629275	Chr3:87320361	5449	Chr3:87199633_87336587
ss74826314	rs10213251	Chr4:102627992	4790	Chr4:102441329_102677302
ss74811153	rs2866413	Chr4:102635920	4790	Chr4:102441329_102677302
ss74854111	rs10025625	Chr4:102881085	493856	Chr4:102768134_102952807
ss74808855	rs764205	Chr4:109869755	1950	Chr4:109852884_110072962
ss74808432	rs11568943	Chr4:109961965	1950	Chr4:109852884_110072962
ss74809296	rs2237051	Chr4:109980042	1950	Chr4:109852884_110072962
ss74806931	rs11569017	Chr4:109980955	1950	Chr4:109852884_110072962
ss74806351	rs4698803	Chr4:109993271	1950	Chr4:109852884_110072962
ss74838553	rs17320841	Chr4:110030096	1950	Chr4:109852884_110072962
ss74853454	rs6816508	Chr4:110036187	1950	Chr4:109852884_110072962
ss74826102	rs3813826	Chr4:110046632	1950	Chr4:109852884_110072962
ss74811149	rs4370153	Chr4:121761852	890	Chr4:121756444_121883933
ss74819057	rs4833772	Chr4:121766336	890	Chr4:121756444_121883933
ss74806929	rs2270565	Chr4:140562317	7350	Chr4:140499860_140628835
ss74828130	rs1481120	Chr4:173321126	3148	Chr4:173271376_173394444
ss74845172	rs11132277	Chr4:185106370	291	Chr4:185083263_185210384
ss74845289	rs10002793	Chr4:185124378	291	Chr4:185083263_185210384
ss74809285	rs1133657	Chr4:185190485	291	Chr4:185083263_185210384
ss74807826	rs3736265	Chr4:23813084	10891	Chr4:23732021_24151635
ss74808470	rs8192678	Chr4:23814039	10891	Chr4:23732021_24151635
ss74834954	rs4235308	Chr4:23862789	10891	Chr4:23732021_24151635
ss74846235	rs7677000	Chr4:23867831	10891	Chr4:23732021_24151635
ss74825161	rs4550905	Chr4:23873936	10891	Chr4:23732021_24151635
ss74841035	rs17637318	Chr4:23879362	10891	Chr4:23732021_24151635
ss74839807	rs4469064	Chr4:23882173	10891	Chr4:23732021_24151635
ss74808476	rs1801058	Chr4:3037423	3064	Chr4:3014681_3303960
ss74819479	rs363075	Chr4:3135947	3064	Chr4:3014681_3303960
ss74807828	rs362331	Chr4:3214108	3064	Chr4:3014681_3303960
ss74825032	rs2159173	Chr4:3265189	3064	Chr4:3014681_3303960
ss74851203	rs12649180	Chr4:41221397	7345	Chr4:41196881_41328429
ss74831198	rs11722918	Chr4:41232407	7345	Chr4:41196881_41328429
ss74829993	rs10517002	Chr4:41262532	7345	Chr4:41196881_41328429
ss74831236	rs6840502	Chr4:41298363	7345	Chr4:41196881_41328429
ss74820211	rs17084051	Chr4:54221414	5156	Chr4:54169097_54358245
ss74819497	rs6554162	Chr4:54227788	5156	Chr4:54169097_54358245
ss74824723	rs13132085	Chr4:55593918	9575	Chr4:55367901_55606909
ss74837760	rs11722069	Chr4:82368220	3184	Chr4:82293314_82433996
ss74844579	rs13124637	Chr4:82394381	3184	Chr4:82293314_82433996
ss74807444	rs4073918	Chr5:1244310	7015	Chr5:1193167_1355047
ss74847174	rs1510955	Chr5:126822508	4001	Chr5:126716623_126897020
ss74831116	rs867512	Chr5:126851362	4001	Chr5:126716623_126897020
ss74835763	rs7716228	Chr5:138632248	3313	Chr5:138494882_138635629
ss74847141	rs10072121	Chr5:141572979	8841	Chr5:141560876_141696856
ss74832778	rs2545025	Chr5:141631779	8841	Chr5:141560876_141696856
ss74836167	rs7711960	Chr5:141646362	8841	Chr5:141560876_141696856
ss74831570	rs17286989	Chr5:141647245	8841	Chr5:141560876_141696856
ss74833546	rs12654225	Chr5:141654678	8841	Chr5:141560876_141696856
ss74839853	rs244468	Chr5:143224856	2908	Chr5:143217931_143793756
ss74848475	rs6877893	Chr5:143347628	2908	Chr5:143217931_143793756
ss74845283	rs6872252	Chr5:143564665	2908	Chr5:143217931_143793756
ss74828420	rs325247	Chr5:143739946	2908	Chr5:143217931_143793756
ss74837250	rs4986589	Chr5:143761369	2908	Chr5:143217931_143793756
ss74834126	rs17415614	Chr5:143761457	2908	Chr5:143217931_143793756
ss74831140	rs2282806	Chr5:150062911	5159	Chr5:150053839_150215884
ss74816143	rs10079250	Chr5:150070569	5159	Chr5:150053839_150215884
ss74823953	rs1465693	Chr5:150101759	5159	Chr5:150053839_150215884
ss74836418	rs17725712	Chr5:150111245	5159	Chr5:150053839_150215884
ss74825039	rs2240780	Chr5:150133509	5159	Chr5:150053839_150215884
ss74815483	rs9764398	Chr5:177937883	5626	Chr5:177932235_178056242
ss74814521	rs13157845	Chr5:177951570	5626	Chr5:177932235_178056242
ss74806138	rs11953798	Chr5:178056117	5626	Chr5:177932235_178056242
ss74813613	rs11953029	Chr5:178056183	5626	Chr5:177932235_178056242
ss74806711	rs248248	Chr5:179840949	8878	Chr5:179746388_179898078
ss74808575	rs12656368	Chr5:180226428	5601	Chr5:180173594_180352071
ss74853010	rs12521860	Chr5:35814003	3575	Chr5:35796875_35939603
ss74810722	rs1494558	Chr5:35860966	3575	Chr5:35796875_35939603
ss74807967	rs1494555	Chr5:35871088	3575	Chr5:35796875_35939603
ss74809017	rs3194051	Chr5:35876172	3575	Chr5:35796875_35939603
ss74824156	rs860416	Chr5:35906879	3575	Chr5:35796875_35939603
ss74810721	rs1445898	Chr5:35910427	3575	Chr5:35796875_35939603
ss74839099	rs7731163	Chr5:42666796	2690	Chr5:42363475_42781878
ss74806562	rs6180	Chr5:42719137	2690	Chr5:42363475_42781878
ss74850855	rs4647081	Chr5:60920757	1161	Chr5:60813832_61005078
ss74846170	rs40419	Chr5:68219774	5295	Chr5:68155756_68361821
ss74827004	rs863818	Chr5:68258195	5295	Chr5:68155756_68361821
ss74826704	rs831122	Chr5:68267102	5295	Chr5:68155756_68361821
ss74842198	rs2161120	Chr5:68268368	5295	Chr5:68155756_68361821
ss74829490	rs830557	Chr5:68312915	5295	Chr5:68155756_68361821
ss74836965	rs12656918	Chr5:69280187	1022	Chr5:69174795_69337430
ss74813034	rs10471774	Chr5:69320504	1022	Chr5:69174795_69337430
ss74842725	rs9466075	Chr6:10367628	7020	Chr6:10336677_10479564
ss74852891	rs503532	Chr6:10389738	7020	Chr6:10336677_10479564
ss74807628	rs303061	Chr6:10429938	7020	Chr6:10336677_10479564
ss74834853	rs12526712	Chr6:10434987	7020	Chr6:10336677_10479564
ss74840171	rs9480865	Chr6:108595370	2309	Chr6:108499823_108744769
ss74830403	rs13207511	Chr6:108632772	2309	Chr6:108499823_108744769
ss74837472	rs9480866	Chr6:108641439	2309	Chr6:108499823_108744769
ss74823322	rs761779	Chr6:108690124	2309	Chr6:108499823_108744769
ss74847382	rs352080	Chr6:113889247	3066	Chr6:113876156_114031195
ss74827287	rs6900496	Chr6:113901220	3066	Chr6:113876156_114031195
ss74834308	rs17792118	Chr6:113940432	3066	Chr6:113876156_114031195
ss74835019	rs12208304	Chr6:113948378	3066	Chr6:113876156_114031195
ss74851962	rs1322454	Chr6:113983073	3066	Chr6:113876156_114031195
ss74852187	rs1044582	Chr6:131890968	1490	Chr6:131888176_132011378
ss74829918	rs1997703	Chr6:136648715	4217	Chr6:136497040_136853047
ss74846390	rs17710825	Chr6:136839368	4217	Chr6:136497040_136853047
ss74811930	rs12174349	Chr6:149718012	5110	Chr6:149689695_149871421
ss74810115	rs4816	Chr6:149793609	5110	Chr6:149689695_149871421
ss74835747	rs11155806	Chr6:151635755	2099	Chr6:151630496_152163274
ss74841829	rs2881766	Chr6:151797984	2099	Chr6:151630496_152163274
ss74832411	rs11155813	Chr6:151828300	2099	Chr6:151630496_152163274
ss74853460	rs3853251	Chr6:151839621	2099	Chr6:151630496_152163274
ss74852518	rs9322332	Chr6:151845666	2099	Chr6:151630496_152163274
ss74825652	rs4870062	Chr6:151916483	2099	Chr6:151630496_152163274
ss74827562	rs9371564	Chr6:151940978	2099	Chr6:151630496_152163274
ss74838941	rs932480	Chr6:151967106	2099	Chr6:151630496_152163274
ss74841345	rs1884052	Chr6:151970231	2099	Chr6:151630496_152163274
ss74831558	rs9397463	Chr6:151983193	2099	Chr6:151630496_152163274
ss74823854	rs2813549	Chr6:152120104	2099	Chr6:151630496_152163274
ss74846045	rs9397486	Chr6:152128765	2099	Chr6:151630496_152163274
ss74848338	rs13211987	Chr6:152134963	2099	Chr6:151630496_152163274
ss74820193	rs17082236	Chr6:152149617	2099	Chr6:151630496_152163274
ss74845924	rs9397085	Chr6:152157685	2099	Chr6:151630496_152163274
ss74849070	rs9457688	Chr6:159624968	6648	Chr6:159619116_159753321
ss74817431	rs6927536	Chr6:170502561	6908	Chr6:170494333_170632870
ss74815696	rs6913643	Chr6:170503067	6908	Chr6:170494333_170632870
ss74806316	rs12717	Chr6:170553212	6908	Chr6:170494333_170632870
ss74808228	rs2516489	Chr6:31520261	7124	Chr6:31515567_31638336
ss74833923	rs11796	Chr6:31533435	7124	Chr6:31515567_31638336
ss74831986	rs933208	Chr6:31538871	7124	Chr6:31515567_31638336
ss74806983	rs3130062	Chr6:31558135	7124	Chr6:31515567_31638336
ss74838062	rs928815	Chr6:31563438	7124	Chr6:31515567_31638336
ss74808227	rs2736182	Chr6:31615535	7124	Chr6:31515567_31638336
ss74831473	rs2857597	Chr6:31617223	7124	Chr6:31515567_31638336
ss74815370	rs11538263	Chr6:31633958	7124	Chr6:31515567_31638336
ss74808776	rs11229	Chr6:31635993	7124	Chr6:31515567_31638336
ss74806364	rs3132453	Chr6:31636267	7124	Chr6:31515567_31638336
ss74810184	rs1802127	Chr6:31762148	3303	Chr6:31755514_31877942
ss74814987	rs11531	Chr6:31782732	3303	Chr6:31755514_31877942
ss74814987	rs11531	Chr6:31782732	3304	Chr6:31767735_31890254
ss74819408	rs2227955	Chr6:31810300	3303	Chr6:31755514_31877942
ss74819408	rs2227955	Chr6:31810300	3304	Chr6:31767735_31890254
ss74808280	rs2227956	Chr6:31810495	3303	Chr6:31755514_31877942
ss74808280	rs2227956	Chr6:31810495	3304	Chr6:31767735_31890254
ss74806360	rs644827	Chr6:31870664	3303	Chr6:31755514_31877942
ss74806360	rs644827	Chr6:31870664	3304	Chr6:31767735_31890254
ss74812407	rs2242665	Chr6:31871532	3303	Chr6:31755514_31877942
ss74812407	rs2242665	Chr6:31871532	3304	Chr6:31767735_31890254
ss74834338	rs12214476	Chr6:33588548	578	Chr6:33512546_33640296
ss74836103	rs12206050	Chr6:33596519	578	Chr6:33512546_33640296
ss74814453	rs17707331	Chr6:35992613	1432	Chr6:35967677_36171236
ss74818987	rs17713154	Chr6:35999995	1432	Chr6:35967677_36171236
ss74851215	rs612556	Chr6:36001493	1432	Chr6:35967677_36171236
ss74809381	rs743923	Chr6:36012344	1432	Chr6:35967677_36171236
ss74828781	rs10456443	Chr6:36653670	1026	Chr6:36616460_36747339
ss74847483	rs10807170	Chr6:36661667	1026	Chr6:36616460_36747339
ss74812873	rs1977172	Chr6:36673977	1026	Chr6:36616460_36747339
ss74814782	rs1864750	Chr6:36737030	1026	Chr6:36616460_36747339
ss74823865	rs833068	Chr6:43774790	7422	Chr6:43710209_43846487
ss74831538	rs9369421	Chr6:43794385	7422	Chr6:43710209_43846487
ss74836503	rs9463851	Chr6:52968267	2941	Chr6:52917948_53055380
ss74847405	rs1802061	Chr6:52984527	2941	Chr6:52917948_53055380
ss74846724	rs2274760	Chr6:52985357	2941	Chr6:52917948_53055380
ss74833449	rs6458895	Chr6:53020975	2941	Chr6:52917948_53055380
ss74852914	rs2100375	Chr6:53520677	2729	Chr6:53437341_53605129
ss74841481	rs3799698	Chr6:53537105	2729	Chr6:53437341_53605129
ss74838315	rs9474592	Chr6:53555418	2729	Chr6:53437341_53605129
ss74823109	rs1213371	Chr6:77470328	3351	Chr6:77402231_77523403
ss74830175	rs13218209	Chr6:8037916	9521	Chr6:8013360_8162595
ss74829802	rs2815164	Chr6:8080788	9521	Chr6:8013360_8162595
ss74823140	rs11757832	Chr6:88132435	1268	Chr6:88079864_88226688
ss74850691	rs806370	Chr6:88146612	1268	Chr6:88079864_88226688
ss74826263	rs806377	Chr6:88149004	1268	Chr6:88079864_88226688
ss74832924	rs9444584	Chr6:88152840	1268	Chr6:88079864_88226688
ss74851662	rs7809330	Chr7:107136122	26959	Chr7:107108961_107262529
ss74852447	rs11760261	Chr7:107139035	26959	Chr7:107108961_107262529
ss74846252	rs12538592	Chr7:116487730	857	Chr7:116464785_116621185
ss74809487	rs8940	Chr7:116506020	857	Chr7:116464785_116621185
ss74852546	rs1052990	Chr7:116508316	857	Chr7:116464785_116621185
ss74843617	rs10256914	Chr7:116535657	857	Chr7:116464785_116621185
ss74831055	rs959173	Chr7:116542000	857	Chr7:116464785_116621185
ss74837015	rs6964272	Chr7:123139973	6561	Chr7:123053534_123259971
ss74809142	rs2140516	Chr7:123169180	6561	Chr7:123053534_123259971
ss74847950	rs3750036	Chr7:128306848	3952	Chr7:128181189_128317629
ss74813579	rs10282312	Chr7:143320714	835	Chr7:143228215_143367696
ss74816881	rs13438232	Chr7:143346147	835	Chr7:143228215_143367696
ss74848808	rs13228494	Chr7:150940006	4846	Chr7:150931056_151074944
ss74829307	rs12703107	Chr7:150986541	4846	Chr7:150931056_151074944
ss74839489	rs13233298	Chr7:2188072	4521	Chr7:2182222_2311145
ss74850026	rs7787274	Chr7:2236358	4521	Chr7:2182222_2311145
ss74836048	rs10226383	Chr7:22755059	3569	Chr7:22667147_22792002
ss74830671	rs10229457	Chr7:22761181	3569	Chr7:22667147_22792002
ss74825650	rs7792045	Chr7:2277217	4521	Chr7:2182222_2311145
ss74844461	rs10256620	Chr7:22783447	3569	Chr7:22667147_22792002
ss74824741	rs765840	Chr7:30919869	2692	Chr7:30904021_31039531
ss74824856	rs4723036	Chr7:30959501	2692	Chr7:30904021_31039531
ss74834097	rs17159769	Chr7:30962925	2692	Chr7:30904021_31039531
ss74814513	rs4988496	Chr7:30969071	2692	Chr7:30904021_31039531
ss74825192	rs2741	Chr7:30975950	2692	Chr7:30904021_31039531
ss74831579	rs2471551	Chr7:45917456	3486	Chr7:45852245_45981272
ss74824337	rs788754	Chr7:45980515	3486	Chr7:45852245_45981272
ss74836341	rs11766515	Chr7:45980764	3486	Chr7:45852245_45981272
ss74831877	rs1024748	Chr7:55060646	1956	Chr7:54959032_55267338
ss74854771	rs3800827	Chr7:55074961	1956	Chr7:54959032_55267338
ss74836250	rs2302535	Chr7:55086995	1956	Chr7:54959032_55267338
ss74837087	rs2041646	Chr7:55113668	1956	Chr7:54959032_55267338
ss74850916	rs9649847	Chr7:55119445	1956	Chr7:54959032_55267338
ss74806877	rs2071307	Chr7:74056384	2006	Chr7:73967789_74129907
ss74815195	rs2071307	Chr7:74056384	2006	Chr7:73967789_74129907
ss74825360	rs10949835	Chr7:74074592	2006	Chr7:73967789_74129907
ss74806117	rs6461378	Chr7:842031	23353	Chr7:755557_934920
ss74811692	rs854524	Chr7:95269499	5444	Chr7:95238357_95384572
ss74845673	rs3917586	Chr7:95297009	5444	Chr7:95238357_95384572
ss74820980	rs662	Chr7:95308134	5444	Chr7:95238357_95384572
ss74817318	rs854560	Chr7:95316772	5444	Chr7:95238357_95384572
ss74826708	rs2299260	Chr7:95320225	5444	Chr7:95238357_95384572
ss74832559	rs1521191	Chr8:10037720	4482	Chr8:9994320_10488891
ss74839206	rs2923774	Chr8:100974636	7534	Chr8:100858576_101013489
ss74844317	rs17151147	Chr8:10125859	4482	Chr8:9994320_10488891
ss74854246	rs12545788	Chr8:10128507	4482	Chr8:9994320_10488891
ss74839138	rs4841283	Chr8:10131399	4482	Chr8:9994320_10488891
ss74843980	rs17151244	Chr8:10171942	4482	Chr8:9994320_10488891
ss74828676	rs11787370	Chr8:10173392	4482	Chr8:9994320_10488891
ss74822807	rs7844115	Chr8:10206985	4482	Chr8:9994320_10488891
ss74821626	rs923047	Chr8:10214735	4482	Chr8:9994320_10488891
ss74826162	rs4840467	Chr8:10222127	4482	Chr8:9994320_10488891
ss74828243	rs11249978	Chr8:10225236	4482	Chr8:9994320_10488891
ss74845295	rs2975734	Chr8:10232587	4482	Chr8:9994320_10488891
ss74832640	rs10106875	Chr8:10256233	4482	Chr8:9994320_10488891
ss74828999	rs4841304	Chr8:10262787	4482	Chr8:9994320_10488891
ss74843804	rs2975668	Chr8:10271029	4482	Chr8:9994320_10488891
ss74841534	rs2975647	Chr8:10278871	4482	Chr8:9994320_10488891
ss74847242	rs6601431	Chr8:10313035	4482	Chr8:9994320_10488891
ss74851088	rs10111917	Chr8:10315945	4482	Chr8:9994320_10488891
ss74840927	rs4841324	Chr8:10344022	4482	Chr8:9994320_10488891
ss74830853	rs6984111	Chr8:10354278	4482	Chr8:9994320_10488891
ss74842404	rs11249994	Chr8:10379305	4482	Chr8:9994320_10488891
ss74826392	rs10283145	Chr8:10383901	4482	Chr8:9994320_10488891
ss74835580	rs4433149	Chr8:10391758	4482	Chr8:9994320_10488891
ss74823482	rs6601455	Chr8:10415916	4482	Chr8:9994320_10488891
ss74832532	rs7000959	Chr8:10433056	4482	Chr8:9994320_10488891
ss74851082	rs4545058	Chr8:127786757	4609	Chr8:127676069_127801434
ss74822876	rs2176397	Chr8:140612438	5747	Chr8:140598382_141061313
ss74846216	rs10087629	Chr8:140614946	5747	Chr8:140598382_141061313
ss74824838	rs4406451	Chr8:140812162	5747	Chr8:140598382_141061313
ss74826189	rs12544802	Chr8:140933647	5747	Chr8:140598382_141061313
ss74836451	rs12546017	Chr8:27261088	2185	Chr8:27251482_27519391
ss74836676	rs2292979	Chr8:27298985	2185	Chr8:27251482_27519391
ss74831307	rs7833348	Chr8:27313969	2185	Chr8:27251482_27519391
ss74818825	rs4534095	Chr8:27347081	2185	Chr8:27251482_27519391
ss74834745	rs2322718	Chr8:27400270	2185	Chr8:27251482_27519391
ss74822380	rs11986969	Chr8:27407435	2185	Chr8:27251482_27519391
ss74848662	rs11776693	Chr8:27448642	2185	Chr8:27251482_27519391
ss74834383	rs2741339	Chr8:27477452	2185	Chr8:27251482_27519391
ss74828825	rs2071575	Chr8:27540915	1191	Chr8:27536917_27675031
ss74822125	rs11780592	Chr8:27561230	1191	Chr8:27536917_27675031
ss74845057	rs17057406	Chr8:27570468	1191	Chr8:27536917_27675031
ss74826532	rs541955	Chr8:27663284	1191	Chr8:27536917_27675031
ss74845389	rs17636471	Chr8:30634599	2936	Chr8:30618061_30787969
ss74828661	rs7017734	Chr8:30777927	2936	Chr8:30618061_30787969
ss74841724	rs4733220	Chr8:31043374	7486	Chr8:30973262_31233761
ss74809911	rs2230009	Chr8:31064419	7486	Chr8:30973262_31233761
ss74821439	rs1800391	Chr8:31081188	7486	Chr8:30973262_31233761
ss74834657	rs9649886	Chr8:31105177	7486	Chr8:30973262_31233761
ss74821773	rs11574358	Chr8:31147066	7486	Chr8:30973262_31233761
ss74825812	rs1882928	Chr8:31166306	7486	Chr8:30973262_31233761
ss74819048	rs1346044	Chr8:31167138	7486	Chr8:30973262_31233761
ss74851417	rs7463426	Chr8:31666456	3084	Chr8:31579304_32825040
ss74852216	rs13268778	Chr8:31715049	3084	Chr8:31579304_32825040
ss74839896	rs13276892	Chr8:31772998	3084	Chr8:31579304_32825040
ss74834090	rs10093273	Chr8:31838116	3084	Chr8:31579304_32825040
ss74848127	rs2062054	Chr8:31885542	3084	Chr8:31579304_32825040
ss74831485	rs7465523	Chr8:31991852	3084	Chr8:31579304_32825040
ss74840431	rs10503901	Chr8:32227655	3084	Chr8:31579304_32825040
ss74827465	rs12680804	Chr8:32258878	3084	Chr8:31579304_32825040
ss74847021	rs7003988	Chr8:32322806	3084	Chr8:31579304_32825040
ss74838711	rs7832999	Chr8:32389728	3084	Chr8:31579304_32825040
ss74840607	rs4733119	Chr8:32401569	3084	Chr8:31579304_32825040
ss74847753	rs7838347	Chr8:32540383	3084	Chr8:31579304_32825040
ss74808628	rs3924999	Chr8:32595840	3084	Chr8:31579304_32825040
ss74834675	rs10503927	Chr8:32685712	3084	Chr8:31579304_32825040
ss74834264	rs2919384	Chr8:32702425	3084	Chr8:31579304_32825040
ss74809633	rs10503929	Chr8:32756465	3084	Chr8:31579304_32825040
ss74808881	rs3735781	Chr8:32767310	3084	Chr8:31579304_32825040
ss74806591	rs3735782	Chr8:32767339	3084	Chr8:31579304_32825040
ss74807428	rs13317	Chr8:38411996	2260	Chr8:38351138_38528834
ss74843769	rs2978073	Chr8:38438024	2260	Chr8:38351138_38528834
ss74840565	rs6983315	Chr8:38441901	2260	Chr8:38351138_38528834
ss74848209	rs7825208	Chr8:38469769	2260	Chr8:38351138_38528834
ss74809625	rs7830743	Chr8:47798394	5591	Chr8:47713108_48020183
ss74806243	rs4278157	Chr8:47826744	5591	Chr8:47713108_48020183
ss74810878	rs8178017	Chr8:47939665	5591	Chr8:47713108_48020183
ss74809066	rs762679	Chr8:47972876	5591	Chr8:47713108_48020183
ss74808010	rs2291219	Chr8:73069926	7013	Chr8:72948862_73107752
ss74851337	rs11776228	Chr8:78774001	3574	Chr8:78672772_78865523
ss74829376	rs10110519	Chr8:78775791	3574	Chr8:78672772_78865523
ss74846917	rs2583762	Chr8:78785248	3574	Chr8:78672772_78865523
ss74848527	rs2246022	Chr8:89917940	4683	Chr8:89873336_90044724
ss74833610	rs2142097	Chr8:89932804	4683	Chr8:89873336_90044724
ss74832342	rs6477748	Chr9:110212567	7295	Chr9:110183812_110316640
ss74842339	rs1571779	Chr9:110213828	7295	Chr9:110183812_110316640
ss74827918	rs10759398	Chr9:110214838	7295	Chr9:110183812_110316640
ss74825206	rs2026314	Chr9:110242980	7295	Chr9:110183812_110316640
ss74829624	rs7025886	Chr9:116180160	5069	Chr9:116093792_116462321
ss74824481	rs7469968	Chr9:116217770	5069	Chr9:116093792_116462321
ss74854923	rs17175194	Chr9:116260124	5069	Chr9:116093792_116462321
ss74845563	rs10817866	Chr9:116264797	5069	Chr9:116093792_116462321
ss74830375	rs1331138	Chr9:116270336	5069	Chr9:116093792_116462321
ss74807660	rs7020782	Chr9:116344602	5069	Chr9:116093792_116462321
ss74846841	rs12236532	Chr9:116386390	5069	Chr9:116093792_116462321
ss74841413	rs1858015	Chr9:116404941	5069	Chr9:116093792_116462321
ss74815976	rs17150554	Chr9:133404019	6834	Chr9:133291805_133416670
ss74817691	rs2459	Chr9:136648747	10555	Chr9:136613143_136747459
ss74843192	rs10117822	Chr9:136708200	10555	Chr9:136613143_136747459
ss74850908	rs3217992	Chr9:22003224	1029	Chr9:21907752_22054491
ss74850908	rs3217992	Chr9:22003224	1030	Chr9:21942903_22069313
ss74851444	rs495490	Chr9:22010413	1029	Chr9:21907752_22054491
ss74851444	rs495490	Chr9:22010413	1030	Chr9:21942903_22069313
ss74828237	rs8181047	Chr9:22064466	1030	Chr9:21942903_22069313
ss74843362	rs639949	Chr9:32490677	10210	Chr9:32480544_32612628
ss74806378	rs10813831	Chr9:32526148	10210	Chr9:32480544_32612628
ss74838838	rs1888869	Chr9:32998239	54840	Chr9:32912606_33061641
ss74814474	rs10972281	Chr9:35010741	7415	Chr9:34996068_35132742
ss74820151	rs10972282	Chr9:35010830	7415	Chr9:34996068_35132742
ss74837711	rs7035298	Chr9:4942778	3717	Chr9:4925245_5189948
ss74807018	rs3824433	Chr9:5113577	3717	Chr9:4925245_5189948
ss74828727	rs2297231	Chr9:68991399	2395	Chr9:68975563_69160178
ss74848308	rs11145164	Chr9:69096068	2395	Chr9:68975563_69160178
ss74809771	rs2773347	Chr9:97625915	7507	Chr9:97574451_97757409

## Sheet: 1f.NumberSNPsAssignedToEachGene
Supplementary Table 1f. Number of SNPs assigned to each longevity associated gene.
Entrez Gene ID	# SNPs assigned to gene
1050	1
1161	1
1386	1
1454	1
1490	1
1649	1
2064	1
2067	1
2072	1
2308	1
23353	1
25942	1
26580	1
2691	1
2730	1
2896	1
3070	1
3148	1
3313	1
3320	1
3351	1
3481	1
3630	1
3667	1
3725	1
3952	1
4084	1
4149	1
4292	1
4601	1
4609	1
4791	1
493856	1
5052	1
5155	1
5428	1
54840	1
5601	1
5781	1
648	1
6623	1
6647	1
6648	1
6667	1
6834	1
7013	1
7015	1
7027	1
7040	1
7153	1
7329	1
7350	1
7507	1
7534	1
79661	1
847	1
8878	1
9575	1
9611	1
983	1
10210	2
1022	2
1029	2
10555	2
10683	2
11200	2
1387	2
2068	2
2071	2
2202	2
2237	2
2353	2
2395	2
2690	2
26959	2
2879	2
2885	2
2936	2
2	2
3184	2
348	2
3717	2
3738	2
4001	2
4217	2
4436	2
4683	2
4790	2
4846	2
5110	2
5156	2
5291	2
5371	2
5424	2
545	2
5468	2
5599	2
578	2
5970	2
5979	2
6285	2
6561	2
6929	2
7012	2
701	2
7150	2
7314	2
7341	2
7415	2
7422	2
835	2
8480	2
890	2
9521	2
10229	3
1030	3
111	3
1443	3
1444	3
1938	3
2006	3
2033	3
2057	3
2729	3
27429	3
291	3
3091	3
3146	3
3485	3
3486	3
3569	3
3574	3
406	3
4521	3
472	3
4792	3
4804	3
51548	3
5300	3
5449	3
5728	3
6464	3
6908	3
7157	3
7351	3
8835	3
9612	3
10269	4
1026	4
1191	4
1268	4
1385	4
142	4
1432	4
2260	4
2309	4
2321	4
2335	4
23410	4
26291	4
2688	4
2941	4
2950	4
3064	4
3221	4
3312	4
345	4
3953	4
4000	4
4493	4
5290	4
5580	4
5591	4
5626	4
56648	4
5747	4
581	4
5888	4
641	4
7020	4
712	4
7158	4
7161	4
7295	4
7345	4
7352	4
8074	4
1956	5
2074	5
2692	5
2932	5
3066	5
3304	5
4249	5
4282	5
5159	5
5295	5
5444	5
5770	5
5830	5
5893	5
596	5
6391	5
7520	5
857	5
8841	5
8940	5
2908	6
3303	6
3575	6
4803	6
6117	6
672	6
7155	6
10891	7
2073	7
4137	7
5465	7
7486	7
773	7
9365	7
1950	8
2185	8
3480	8
3643	8
5069	8
539	8
5663	8
6753	8
8660	8
1071	9
351	9
355	9
3727	9
4036	10
7124	10
675	11
7174	11
8626	12
328	13
5105	13
2099	15
5578	17
3084	18
4482	24
Median	3
Range	1-24
Average	3.59
Total	880

## Sheet: 1g.Pathways
Supplementary Table 1g. Set of pathways extracted manually from KEGG based on their known association with longevity through literature search, and overlap between the genes in each pathway with the set of ageing related genes.
Pathway	# Genes in KEGG pathway	# Genes in common with ageing genes	% gene overlap between KEGG and GenAge genes	>10 genes in pathway, >=10 genes in common with GenAge genes and >10% in common between KEGG and GenAge genes
Genomic Instability
Base Excision Repair	33	6	18.1818
DNA Replication	36	3	8.33333
Fanconi Anemia	53	10	18.8679	*
Homologous Recombination	28	8	28.5714
Mismatch Repair	23	4	17.3913
Non Homologous End Joining	13	3	23.0769
Nucleotide Excision Repair	47	11	23.4043	*
Immune system
Antigen Processing And Presentation	79	6	7.59494
B Cell Receptor Signalling	72	10	13.8889	*
Chemokine Signalling	189	15	7.93651
Complement And Coagulation	69	2	2.89855
Cytosolic DNA Sensing	64	4	6.25
Fc Epsilon Signalling	70	10	14.2857	*
Fc Phagocytosis	91	5	5.49451
Hempoietic Cell	88	5	5.68182
Immune Network For IgA Production	49	2	4.08163
Leukocyte TransEndothelial Migration	118	8	6.77966
NKC Mediated Cytotoxicity	134	10	7.46269
NOD Like Receptor Signalling	57	9	15.7895
Platelet Activation	131	6	4.58015
Rig1 Receptor Signalling	70	8	11.4286
T Cell Receptor Signalling	104	13	12.5	*
Toll Like Receptor Signalling	106	13	12.2642	*
Proteolysis
Proteosome	44	0	0
Ubiquitin Mediated Proteolysis	137	4	2.91971
Signalling
AMPK Signalling	124	18	14.5161	*
Calcium Signalling	180	9	5
cAMP Signalling	200	16	8
Cytokine Cytokine Receptor Interaction	265	19	7.16981
ECM Receptor	87	1	1.14943
FoxO Signalling	134	29	21.6418	*
Hedgehog Signalling	52	3	5.76923
Insulin Secretion	86	5	5.81395
Insulin Signalling	141	17	12.0567	*
Lysosome	122	0	0
MAPK Signalling	257	34	13.2296	*
mTOR Signalling	60	10	16.6667	*
NF KappaB Signalling	91	9	9.89011
Notch Signalling	48	6	12.5
p53 Signalling	68	12	17.6471	*
Peroxisome	81	5	6.17284
Phagosome	155	0	0
PI3K-Akt Signalling	347	47	13.5447	*
Rap1 Signalling	211	22	10.4265	*
Ras Signalling	227	26	11.4537	*
Regulation Of Autophagy	39	1	2.5641
TGF-beta Signalling	80	8	10
TNF Signalling	110	17	15.4545	*
VEGF Signalling	61	8	13.1148
Wnt Signalling	140	11	7.85714
Energy metabolism
Oxidative Phosphorylation	133	2	1.50376
Age related diseases
ALS	51	8	15.6863
Alzheimers	168	3	1.78571
Arrythogenic Right Ventricular Cardiomyopathy	74	1	1.35135
Dilated cardiomyopathy	51	8	15.6863
Huntingtons	183	18	9.83607
Hypertrophic Cardiomyopathy	83	4	4.30108
Myocarditis	193	18	9.32642
Parkinsons	143	7	4.8951
Prion	36	5	13.8889
Cell growth and death
Apoptosis	86	13	15.1163	*
Cell Cycle	124	20	16.129	*
Genetic Information Processing
Aminoacyl-tRNA Biosynthesis	66	0	0
Basal Transcription Factors	46	4	8.69565
ProteinExport	23	0	0
Ribosome	134	0	0
RNA Polymerase	32	0	0
RNA Transport	163	3	1.84049
Spliceosome	130	3	2.30769
