# Supplementary material for: Identification of polymorphisms in cancer patients that differentially affect survival with age
Source: Aging (Albany NY). 2017 Oct 20;9(10):2117–36. doi: 10.18632/aging.101305 (PMC5680559; doi:10.18632/aging.101305)
Supplement: Supplementary file 2 [file aging-09-2117-s002.xlsx]

## Sheet: Index
Page Number	Page Name	Page Description
2a.	SNPAnalysis	List of Kaplan Meier analysis results for SNPs
2b.	KMResultsForSNPsOfInterest	Detailed Kaplan Meier Results for SNPs that demonstrated age-dependent survival patterns
2c.	GeneAnalysis	Kaplan Meier Log Rank P Values for gene analysis
2d.	TwoSNPs-MoreInfoKM	Detailed Kaplan Meier Results for the gene of interest (Entrez ID:2879, GPX4) with two SNPs per gene
2e.	SIRT3-KMResuts	Detailed Kaplan Meier Results for the gene of interest (Entrez ID:23410, SIRT3) with more than two SNPs per gene
2f.	PathwayKMAnalysis	Kaplan Meier Log Rank P Values for pathway analysis
2g.	FoxOKMResults	More detailed information about the Kaplan Meier analysis for the pathway of interest (FoxO signalling).

## Sheet: 2a.SNPAnalysis
Supplementary Table 2a.List of Kaplan Meier analysis results for SNP-level analysis.
The Log Rank P Value is obtained from the Kaplan Meier analysis using the "survival" package in R; the adjusted log rank (FDR) value is a Benjamini-Hochberg False Discovery Rate.
ss ID	rs ID	Cancer Category	Age at Diagnosis Category	Log Rank P Value	Adjusted Log Rank (FDR)	Significant SNPs after FDR (marked with *)
ss74821773	rs11574358	All Except Skin and Sex Cancer	Diagnosed 50 To 64	4.71e-06	0.00250427	*
ss74844938	rs11101340	All Except Skin and Sex Cancer	Diagnosed 50 To 64	6.06e-06	0.00299191	*
ss74814609	rs1794108	All Except Skin and Sex Cancer	Diagnosed 65 To 79	1.96e-07	0.000154368	*
ss74821773	rs11574358	All Except Skin and Sex Cancer	Diagnosed 65 To 79	4.07e-05	0.0187546	*
ss74817808	rs4147918	All Except Skin and Sex Cancer	Diagnosed 65 To 79	5.89e-05	0.0254448	*
ss74821773	rs11574358	All Except Skin and Sex Cancer	Diagnosed > 50	7.09e-10	8.16768e-07	*
ss74814609	rs1794108	All Except Skin and Sex Cancer	Diagnosed > 50	4.57e-06	0.00250427	*
ss74821773	rs11574358	All Except Skin Cancer	Diagnosed 50 To 64	5.69e-07	0.000393293	*
ss74814414	rs17242648	All Except Skin Cancer	Diagnosed 50 To 64	0.000113	0.0459445	*
ss74814609	rs1794108	All Except Skin Cancer	Diagnosed 65 To 79	1.05e-13	2.4192e-10	*
ss74821773	rs11574358	All Except Skin Cancer	Diagnosed 65 To 79	8.42e-11	1.16398e-07	*
ss74817808	rs4147918	All Except Skin Cancer	Diagnosed 65 To 79	9.63e-09	9.50894e-06	*
ss74822356	rs317913	All Except Skin Cancer	Diagnosed 65 To 79	1.1e-06	0.0006912	*
ss74814609	rs1794108	All Except Skin Cancer	Diagnosed > 50	0	0	*
ss74821773	rs11574358	All Except Skin Cancer	Diagnosed > 50	9.99e-16	3.45254e-12	*
ss74822356	rs317913	All Except Skin Cancer	Diagnosed > 50	4.02e-11	6.94656e-08	*
ss74817808	rs4147918	All Except Skin Cancer	Diagnosed > 50	2.01e-07	0.000154368	*
ss74832640	rs10106875	All Except Skin and Sex Cancer	Diagnosed 50 To 64	0.000464	0.178176
ss74847879	rs1558358	All Except Skin and Sex Cancer	Diagnosed 50 To 64	0.00253	0.370483
ss74829229	rs16969771	All Except Skin and Sex Cancer	Diagnosed 50 To 64	0.00331	0.396844
ss74850320	rs10498036	All Except Skin and Sex Cancer	Diagnosed 50 To 64	0.00397	0.407708
ss74831178	rs3934729	All Except Skin and Sex Cancer	Diagnosed 50 To 64	0.00457	0.41822
ss74808001	rs2286007	All Except Skin and Sex Cancer	Diagnosed 50 To 64	0.00584	0.462336
ss74845295	rs2975734	All Except Skin and Sex Cancer	Diagnosed 50 To 64	0.006	0.462336
ss74823603	rs1978346	All Except Skin and Sex Cancer	Diagnosed 50 To 64	0.0061	0.463332
ss74838320	rs635441	All Except Skin and Sex Cancer	Diagnosed 50 To 64	0.00668	0.48672
ss74827465	rs12680804	All Except Skin and Sex Cancer	Diagnosed 50 To 64	0.00698	0.487331
ss74853609	rs7962818	All Except Skin and Sex Cancer	Diagnosed 50 To 64	0.00774	0.49526
ss74810184	rs1802127	All Except Skin and Sex Cancer	Diagnosed 50 To 64	0.0086	0.496512
ss74811078	rs9518825	All Except Skin and Sex Cancer	Diagnosed 50 To 64	0.00924	0.510935
ss74850691	rs806370	All Except Skin and Sex Cancer	Diagnosed 50 To 64	0.011	0.529126
ss74823044	rs11265582	All Except Skin and Sex Cancer	Diagnosed 50 To 64	0.0121	0.542461
ss74832342	rs6477748	All Except Skin and Sex Cancer	Diagnosed 50 To 64	0.0117	0.542461
ss74848920	rs11508026	All Except Skin and Sex Cancer	Diagnosed 50 To 64	0.0148	0.591316
ss74845213	rs8067797	All Except Skin and Sex Cancer	Diagnosed 50 To 64	0.0154	0.598004
ss74816143	rs10079250	All Except Skin and Sex Cancer	Diagnosed 50 To 64	0.0172	0.6228
ss74817331	rs8003245	All Except Skin and Sex Cancer	Diagnosed 50 To 64	0.0212	0.687985
ss74809285	rs1133657	All Except Skin and Sex Cancer	Diagnosed 50 To 64	0.0227	0.706768
ss74833053	rs1008270	All Except Skin and Sex Cancer	Diagnosed 50 To 64	0.0233	0.70931
ss74823636	rs2877716	All Except Skin and Sex Cancer	Diagnosed 50 To 64	0.0243	0.726646
ss74834954	rs4235308	All Except Skin and Sex Cancer	Diagnosed 50 To 64	0.0244	0.726646
ss74822550	rs13058338	All Except Skin and Sex Cancer	Diagnosed 50 To 64	0.027	0.73474
ss74824539	rs3764261	All Except Skin and Sex Cancer	Diagnosed 50 To 64	0.0268	0.73474
ss74848270	rs10513055	All Except Skin and Sex Cancer	Diagnosed 50 To 64	0.0269	0.73474
ss74818656	rs17507827	All Except Skin and Sex Cancer	Diagnosed 50 To 64	0.0277	0.737624
ss74826102	rs3813826	All Except Skin and Sex Cancer	Diagnosed 50 To 64	0.0293	0.743601
ss74838757	rs10854124	All Except Skin and Sex Cancer	Diagnosed 50 To 64	0.0292	0.743601
ss74825354	rs4757132	All Except Skin and Sex Cancer	Diagnosed 50 To 64	0.0331	0.779874
ss74828801	rs4954119	All Except Skin and Sex Cancer	Diagnosed 50 To 64	0.0365	0.7884
ss74837593	rs165933	All Except Skin and Sex Cancer	Diagnosed 50 To 64	0.0368	0.789943
ss74809066	rs762679	All Except Skin and Sex Cancer	Diagnosed 50 To 64	0.0376	0.792351
ss74832559	rs1521191	All Except Skin and Sex Cancer	Diagnosed 50 To 64	0.0378	0.794145
ss74806596	rs2228246	All Except Skin and Sex Cancer	Diagnosed 50 To 64	0.0448	0.797266
ss74816309	rs13059911	All Except Skin and Sex Cancer	Diagnosed 50 To 64	0.0448	0.797266
ss74823520	rs11546710	All Except Skin and Sex Cancer	Diagnosed 50 To 64	0.0398	0.797266
ss74826392	rs10283145	All Except Skin and Sex Cancer	Diagnosed 50 To 64	0.0389	0.797266
ss74836748	rs4688054	All Except Skin and Sex Cancer	Diagnosed 50 To 64	0.0439	0.797266
ss74840607	rs4733119	All Except Skin and Sex Cancer	Diagnosed 50 To 64	0.0441	0.797266
ss74840885	rs4804469	All Except Skin and Sex Cancer	Diagnosed 50 To 64	0.0432	0.797266
ss74845258	rs9515118	All Except Skin and Sex Cancer	Diagnosed 50 To 64	0.0427	0.797266
ss74847141	rs10072121	All Except Skin and Sex Cancer	Diagnosed 50 To 64	0.0412	0.797266
ss74806122	rs1372325	All Except Skin and Sex Cancer	Diagnosed 50 To 64	0.0475	0.804428
ss74807536	rs7642480	All Except Skin and Sex Cancer	Diagnosed 50 To 64	0.049	0.804485
ss74809017	rs3194051	All Except Skin and Sex Cancer	Diagnosed 50 To 64	0.0479	0.804485
ss74846252	rs12538592	All Except Skin and Sex Cancer	Diagnosed 50 To 64	0.05	0.809368
ss74838711	rs7832999	All Except Skin and Sex Cancer	Diagnosed 50 To 64	0.0515	0.812436
ss74810878	rs8178017	All Except Skin and Sex Cancer	Diagnosed 50 To 64	0.0532	0.81371
ss74818714	rs9853146	All Except Skin and Sex Cancer	Diagnosed 50 To 64	0.0524	0.81371
ss74814414	rs17242648	All Except Skin and Sex Cancer	Diagnosed 50 To 64	0.0564	0.815558
ss74823363	rs2268257	All Except Skin and Sex Cancer	Diagnosed 50 To 64	0.0557	0.815558
ss74824355	rs11634874	All Except Skin and Sex Cancer	Diagnosed 50 To 64	0.0557	0.815558
ss74825471	rs17105765	All Except Skin and Sex Cancer	Diagnosed 50 To 64	0.0545	0.815558
ss74849286	rs7069590	All Except Skin and Sex Cancer	Diagnosed 50 To 64	0.0547	0.815558
ss74806983	rs3130062	All Except Skin and Sex Cancer	Diagnosed 50 To 64	0.0573	0.815843
ss74835580	rs4433149	All Except Skin and Sex Cancer	Diagnosed 50 To 64	0.0574	0.815843
ss74815976	rs17150554	All Except Skin and Sex Cancer	Diagnosed 50 To 64	0.0584	0.823798
ss74807128	rs2372536	All Except Skin and Sex Cancer	Diagnosed 50 To 64	0.0624	0.827403
ss74809487	rs8940	All Except Skin and Sex Cancer	Diagnosed 50 To 64	0.0608	0.827403
ss74822715	rs380713	All Except Skin and Sex Cancer	Diagnosed 50 To 64	0.0628	0.827403
ss74823058	rs1049562	All Except Skin and Sex Cancer	Diagnosed 50 To 64	0.0632	0.827403
ss74825747	rs135711	All Except Skin and Sex Cancer	Diagnosed 50 To 64	0.0595	0.827403
ss74831579	rs2471551	All Except Skin and Sex Cancer	Diagnosed 50 To 64	0.0601	0.827403
ss74832556	rs7075182	All Except Skin and Sex Cancer	Diagnosed 50 To 64	0.0647	0.827403
ss74836965	rs12656918	All Except Skin and Sex Cancer	Diagnosed 50 To 64	0.0648	0.827403
ss74828420	rs325247	All Except Skin and Sex Cancer	Diagnosed 50 To 64	0.0655	0.832235
ss74819573	rs17010021	All Except Skin and Sex Cancer	Diagnosed 50 To 64	0.0698	0.83326
ss74846216	rs10087629	All Except Skin and Sex Cancer	Diagnosed 50 To 64	0.0678	0.83326
ss74847021	rs7003988	All Except Skin and Sex Cancer	Diagnosed 50 To 64	0.0666	0.83326
ss74812873	rs1977172	All Except Skin and Sex Cancer	Diagnosed 50 To 64	0.0721	0.838239
ss74823108	rs910923	All Except Skin and Sex Cancer	Diagnosed 50 To 64	0.0828	0.848896
ss74828999	rs4841304	All Except Skin and Sex Cancer	Diagnosed 50 To 64	0.0775	0.848896
ss74839896	rs13276892	All Except Skin and Sex Cancer	Diagnosed 50 To 64	0.079	0.848896
ss74842556	rs4790907	All Except Skin and Sex Cancer	Diagnosed 50 To 64	0.0815	0.848896
ss74846861	rs7246772	All Except Skin and Sex Cancer	Diagnosed 50 To 64	0.081	0.848896
ss74854483	rs7619370	All Except Skin and Sex Cancer	Diagnosed 50 To 64	0.0815	0.848896
ss74809296	rs2237051	All Except Skin and Sex Cancer	Diagnosed 50 To 64	0.0846	0.850784
ss74825833	rs838147	All Except Skin and Sex Cancer	Diagnosed 50 To 64	0.084	0.850784
ss74853010	rs12521860	All Except Skin and Sex Cancer	Diagnosed 50 To 64	0.0842	0.850784
ss74846390	rs17710825	All Except Skin and Sex Cancer	Diagnosed 50 To 64	0.0866	0.856101
ss74807826	rs3736265	All Except Skin and Sex Cancer	Diagnosed 50 To 64	0.0875	0.859619
ss74838838	rs1888869	All Except Skin and Sex Cancer	Diagnosed 50 To 64	0.0883	0.859619
ss74850078	rs1399499	All Except Skin and Sex Cancer	Diagnosed 50 To 64	0.088	0.859619
ss74826843	rs6259	All Except Skin and Sex Cancer	Diagnosed 50 To 64	0.0901	0.859739
ss74840936	rs11208647	All Except Skin and Sex Cancer	Diagnosed 50 To 64	0.0893	0.859739
ss74847061	rs13016051	All Except Skin and Sex Cancer	Diagnosed 50 To 64	0.0916	0.860243
ss74807048	rs5996633	All Except Skin and Sex Cancer	Diagnosed 50 To 64	0.0958	0.865774
ss74808476	rs1801058	All Except Skin and Sex Cancer	Diagnosed 50 To 64	0.109	0.865774
ss74808745	rs4915691	All Except Skin and Sex Cancer	Diagnosed 50 To 64	0.113	0.865774
ss74809633	rs10503929	All Except Skin and Sex Cancer	Diagnosed 50 To 64	0.105	0.865774
ss74814958	rs12050102	All Except Skin and Sex Cancer	Diagnosed 50 To 64	0.103	0.865774
ss74819984	rs3810433	All Except Skin and Sex Cancer	Diagnosed 50 To 64	0.0958	0.865774
ss74823482	rs6601455	All Except Skin and Sex Cancer	Diagnosed 50 To 64	0.0991	0.865774
ss74824285	rs5995990	All Except Skin and Sex Cancer	Diagnosed 50 To 64	0.119	0.865774
ss74825689	rs6092495	All Except Skin and Sex Cancer	Diagnosed 50 To 64	0.111	0.865774
ss74826856	rs4790830	All Except Skin and Sex Cancer	Diagnosed 50 To 64	0.115	0.865774
ss74830671	rs10229457	All Except Skin and Sex Cancer	Diagnosed 50 To 64	0.112	0.865774
ss74837012	rs2412545	All Except Skin and Sex Cancer	Diagnosed 50 To 64	0.121	0.865774
ss74838315	rs9474592	All Except Skin and Sex Cancer	Diagnosed 50 To 64	0.103	0.865774
ss74838446	rs17686310	All Except Skin and Sex Cancer	Diagnosed 50 To 64	0.113	0.865774
ss74839922	rs10793069	All Except Skin and Sex Cancer	Diagnosed 50 To 64	0.11	0.865774
ss74840431	rs10503901	All Except Skin and Sex Cancer	Diagnosed 50 To 64	0.117	0.865774
ss74840667	rs2013080	All Except Skin and Sex Cancer	Diagnosed 50 To 64	0.118	0.865774
ss74842368	rs13037493	All Except Skin and Sex Cancer	Diagnosed 50 To 64	0.103	0.865774
ss74843346	rs16960110	All Except Skin and Sex Cancer	Diagnosed 50 To 64	0.1	0.865774
ss74843919	rs6095962	All Except Skin and Sex Cancer	Diagnosed 50 To 64	0.105	0.865774
ss74848461	rs9436739	All Except Skin and Sex Cancer	Diagnosed 50 To 64	0.109	0.865774
ss74850908	rs3217992	All Except Skin and Sex Cancer	Diagnosed 50 To 64	0.122	0.865774
ss74851088	rs10111917	All Except Skin and Sex Cancer	Diagnosed 50 To 64	0.114	0.865774
ss74852389	rs2147420	All Except Skin and Sex Cancer	Diagnosed 50 To 64	0.0977	0.865774
ss74853013	rs9578178	All Except Skin and Sex Cancer	Diagnosed 50 To 64	0.0932	0.865774
ss74853038	rs9831515	All Except Skin and Sex Cancer	Diagnosed 50 To 64	0.104	0.865774
ss74854246	rs12545788	All Except Skin and Sex Cancer	Diagnosed 50 To 64	0.11	0.865774
ss74811238	rs17655	All Except Skin and Sex Cancer	Diagnosed 50 To 64	0.126	0.870042
ss74826686	rs4993000	All Except Skin and Sex Cancer	Diagnosed 50 To 64	0.126	0.870042
ss74817318	rs854560	All Except Skin and Sex Cancer	Diagnosed 50 To 64	0.127	0.872588
ss74823706	rs8030950	All Except Skin and Sex Cancer	Diagnosed 50 To 64	0.127	0.872588
ss74844579	rs13124637	All Except Skin and Sex Cancer	Diagnosed 50 To 64	0.128	0.87511
ss74853454	rs6816508	All Except Skin and Sex Cancer	Diagnosed 50 To 64	0.129	0.877606
ss74826346	rs12734877	All Except Skin and Sex Cancer	Diagnosed 50 To 64	0.132	0.88581
ss74820211	rs17084051	All Except Skin and Sex Cancer	Diagnosed 50 To 64	0.134	0.890585
ss74811773	rs2412544	All Except Skin and Sex Cancer	Diagnosed 50 To 64	0.137	0.897577
ss74847743	rs6567328	All Except Skin and Sex Cancer	Diagnosed 50 To 64	0.137	0.897577
ss74807989	rs669	All Except Skin and Sex Cancer	Diagnosed 50 To 64	0.14	0.902687
ss74819611	rs9554897	All Except Skin and Sex Cancer	Diagnosed 50 To 64	0.141	0.904074
ss74833351	rs933649	All Except Skin and Sex Cancer	Diagnosed 50 To 64	0.143	0.904315
ss74845289	rs10002793	All Except Skin and Sex Cancer	Diagnosed 50 To 64	0.144	0.907318
ss74814782	rs1864750	All Except Skin and Sex Cancer	Diagnosed 50 To 64	0.145	0.907826
ss74828243	rs11249978	All Except Skin and Sex Cancer	Diagnosed 50 To 64	0.146	0.909146
ss74851662	rs7809330	All Except Skin and Sex Cancer	Diagnosed 50 To 64	0.146	0.909146
ss74806711	rs248248	All Except Skin and Sex Cancer	Diagnosed 50 To 64	0.15	0.910419
ss74809771	rs2773347	All Except Skin and Sex Cancer	Diagnosed 50 To 64	0.147	0.910419
ss74811414	rs2283432	All Except Skin and Sex Cancer	Diagnosed 50 To 64	0.152	0.910419
ss74828258	rs9817981	All Except Skin and Sex Cancer	Diagnosed 50 To 64	0.148	0.910419
ss74834383	rs2741339	All Except Skin and Sex Cancer	Diagnosed 50 To 64	0.152	0.910419
ss74839138	rs4841283	All Except Skin and Sex Cancer	Diagnosed 50 To 64	0.149	0.910419
ss74852745	rs11607961	All Except Skin and Sex Cancer	Diagnosed 50 To 64	0.148	0.910419
ss74853206	rs524900	All Except Skin and Sex Cancer	Diagnosed 50 To 64	0.148	0.910419
ss74817691	rs2459	All Except Skin and Sex Cancer	Diagnosed 50 To 64	0.157	0.912906
ss74824156	rs860416	All Except Skin and Sex Cancer	Diagnosed 50 To 64	0.154	0.912906
ss74826162	rs4840467	All Except Skin and Sex Cancer	Diagnosed 50 To 64	0.154	0.912906
ss74843362	rs639949	All Except Skin and Sex Cancer	Diagnosed 50 To 64	0.158	0.912906
ss74845434	rs1957757	All Except Skin and Sex Cancer	Diagnosed 50 To 64	0.156	0.912906
ss74847950	rs3750036	All Except Skin and Sex Cancer	Diagnosed 50 To 64	0.156	0.912906
ss74806252	rs11666105	All Except Skin and Sex Cancer	Diagnosed 50 To 64	0.165	0.913897
ss74819057	rs4833772	All Except Skin and Sex Cancer	Diagnosed 50 To 64	0.173	0.913897
ss74822876	rs2176397	All Except Skin and Sex Cancer	Diagnosed 50 To 64	0.171	0.913897
ss74823882	rs3815409	All Except Skin and Sex Cancer	Diagnosed 50 To 64	0.168	0.913897
ss74828171	rs1811322	All Except Skin and Sex Cancer	Diagnosed 50 To 64	0.172	0.913897
ss74829652	rs11066322	All Except Skin and Sex Cancer	Diagnosed 50 To 64	0.171	0.913897
ss74834338	rs12214476	All Except Skin and Sex Cancer	Diagnosed 50 To 64	0.167	0.913897
ss74839347	rs7516258	All Except Skin and Sex Cancer	Diagnosed 50 To 64	0.17	0.913897
ss74845399	rs1475848	All Except Skin and Sex Cancer	Diagnosed 50 To 64	0.167	0.913897
ss74851203	rs12649180	All Except Skin and Sex Cancer	Diagnosed 50 To 64	0.169	0.913897
ss74853674	rs1181874	All Except Skin and Sex Cancer	Diagnosed 50 To 64	0.162	0.913897
ss74826314	rs10213251	All Except Skin and Sex Cancer	Diagnosed 50 To 64	0.176	0.914448
ss74829801	rs4930210	All Except Skin and Sex Cancer	Diagnosed 50 To 64	0.177	0.914448
ss74826971	rs736170	All Except Skin and Sex Cancer	Diagnosed 50 To 64	0.182	0.918907
ss74829307	rs12703107	All Except Skin and Sex Cancer	Diagnosed 50 To 64	0.183	0.918936
ss74806243	rs4278157	All Except Skin and Sex Cancer	Diagnosed 50 To 64	0.186	0.9216
ss74824404	rs9586007	All Except Skin and Sex Cancer	Diagnosed 50 To 64	0.186	0.9216
ss74836048	rs10226383	All Except Skin and Sex Cancer	Diagnosed 50 To 64	0.186	0.9216
ss74836650	rs10794486	All Except Skin and Sex Cancer	Diagnosed 50 To 64	0.188	0.925538
ss74806351	rs4698803	All Except Skin and Sex Cancer	Diagnosed 50 To 64	0.189	0.925845
ss74811149	rs4370153	All Except Skin and Sex Cancer	Diagnosed 50 To 64	0.189	0.925845
ss74825206	rs2026314	All Except Skin and Sex Cancer	Diagnosed 50 To 64	0.189	0.925845
ss74812262	rs12421329	All Except Skin and Sex Cancer	Diagnosed 50 To 64	0.19	0.927458
ss74826704	rs831122	All Except Skin and Sex Cancer	Diagnosed 50 To 64	0.19	0.927458
ss74828891	rs2275008	All Except Skin and Sex Cancer	Diagnosed 50 To 64	0.191	0.929058
ss74808470	rs8192678	All Except Skin and Sex Cancer	Diagnosed 50 To 64	0.193	0.932495
ss74830946	rs7650103	All Except Skin and Sex Cancer	Diagnosed 50 To 64	0.194	0.932495
ss74851350	rs6510949	All Except Skin and Sex Cancer	Diagnosed 50 To 64	0.194	0.932495
ss74806929	rs2270565	All Except Skin and Sex Cancer	Diagnosed 50 To 64	0.2	0.933323
ss74807315	rs352493	All Except Skin and Sex Cancer	Diagnosed 50 To 64	0.2	0.933323
ss74812284	rs2287657	All Except Skin and Sex Cancer	Diagnosed 50 To 64	0.198	0.933323
ss74822380	rs11986969	All Except Skin and Sex Cancer	Diagnosed 50 To 64	0.199	0.933323
ss74826965	rs9809535	All Except Skin and Sex Cancer	Diagnosed 50 To 64	0.206	0.933323
ss74839206	rs2923774	All Except Skin and Sex Cancer	Diagnosed 50 To 64	0.205	0.933323
ss74845172	rs11132277	All Except Skin and Sex Cancer	Diagnosed 50 To 64	0.199	0.933323
ss74805906	rs13894	All Except Skin and Sex Cancer	Diagnosed 50 To 64	0.209	0.936233
ss74816881	rs13438232	All Except Skin and Sex Cancer	Diagnosed 50 To 64	0.21	0.936465
ss74823508	rs9557916	All Except Skin and Sex Cancer	Diagnosed 50 To 64	0.21	0.936465
ss74806321	rs2070507	All Except Skin and Sex Cancer	Diagnosed 50 To 64	0.212	0.937293
ss74811930	rs12174349	All Except Skin and Sex Cancer	Diagnosed 50 To 64	0.214	0.937293
ss74813428	rs11657835	All Except Skin and Sex Cancer	Diagnosed 50 To 64	0.215	0.937293
ss74843369	rs7629275	All Except Skin and Sex Cancer	Diagnosed 50 To 64	0.219	0.937293
ss74846170	rs40419	All Except Skin and Sex Cancer	Diagnosed 50 To 64	0.211	0.937293
ss74853381	rs4417316	All Except Skin and Sex Cancer	Diagnosed 50 To 64	0.214	0.937293
ss74822619	rs7510675	All Except Skin and Sex Cancer	Diagnosed 50 To 64	0.22	0.938088
ss74806117	rs6461378	All Except Skin and Sex Cancer	Diagnosed 50 To 64	0.221	0.939454
ss74808099	rs7291444	All Except Skin and Sex Cancer	Diagnosed 50 To 64	0.226	0.943304
ss74811894	rs7645550	All Except Skin and Sex Cancer	Diagnosed 50 To 64	0.226	0.943304
ss74818987	rs17713154	All Except Skin and Sex Cancer	Diagnosed 50 To 64	0.225	0.943304
ss74825650	rs7792045	All Except Skin and Sex Cancer	Diagnosed 50 To 64	0.225	0.943304
ss74806253	rs2270941	All Except Skin and Sex Cancer	Diagnosed 50 To 64	0.228	0.94424
ss74807443	rs11202902	All Except Skin and Sex Cancer	Diagnosed 50 To 64	0.227	0.94424
ss74834012	rs7215972	All Except Skin and Sex Cancer	Diagnosed 50 To 64	0.228	0.94424
ss74834336	rs4807942	All Except Skin and Sex Cancer	Diagnosed 50 To 64	0.227	0.94424
ss74832470	rs4932370	All Except Skin and Sex Cancer	Diagnosed 50 To 64	0.23	0.945723
ss74806013	rs2072446	All Except Skin and Sex Cancer	Diagnosed 50 To 64	0.233	0.94577
ss74807134	rs2229263	All Except Skin and Sex Cancer	Diagnosed 50 To 64	0.231	0.94577
ss74813853	rs9300756	All Except Skin and Sex Cancer	Diagnosed 50 To 64	0.238	0.94577
ss74815967	rs25665	All Except Skin and Sex Cancer	Diagnosed 50 To 64	0.232	0.94577
ss74818366	rs7628878	All Except Skin and Sex Cancer	Diagnosed 50 To 64	0.238	0.94577
ss74832861	rs1286729	All Except Skin and Sex Cancer	Diagnosed 50 To 64	0.235	0.94577
ss74835108	rs6025617	All Except Skin and Sex Cancer	Diagnosed 50 To 64	0.231	0.94577
ss74838397	rs7519821	All Except Skin and Sex Cancer	Diagnosed 50 To 64	0.236	0.94577
ss74838580	rs12727	All Except Skin and Sex Cancer	Diagnosed 50 To 64	0.232	0.94577
ss74842198	rs2161120	All Except Skin and Sex Cancer	Diagnosed 50 To 64	0.234	0.94577
ss74849070	rs9457688	All Except Skin and Sex Cancer	Diagnosed 50 To 64	0.233	0.94577
ss74853580	rs4771246	All Except Skin and Sex Cancer	Diagnosed 50 To 64	0.232	0.94577
ss74824639	rs10857584	All Except Skin and Sex Cancer	Diagnosed 50 To 64	0.243	0.947865
ss74806798	rs1181883	All Except Skin and Sex Cancer	Diagnosed 50 To 64	0.252	0.949793
ss74809534	rs2075252	All Except Skin and Sex Cancer	Diagnosed 50 To 64	0.272	0.949793
ss74811153	rs2866413	All Except Skin and Sex Cancer	Diagnosed 50 To 64	0.255	0.949793
ss74812475	rs11466111	All Except Skin and Sex Cancer	Diagnosed 50 To 64	0.263	0.949793
ss74813579	rs10282312	All Except Skin and Sex Cancer	Diagnosed 50 To 64	0.252	0.949793
ss74814453	rs17707331	All Except Skin and Sex Cancer	Diagnosed 50 To 64	0.251	0.949793
ss74814609	rs1794108	All Except Skin and Sex Cancer	Diagnosed 50 To 64	0.264	0.949793
ss74815370	rs11538263	All Except Skin and Sex Cancer	Diagnosed 50 To 64	0.251	0.949793
ss74815750	rs8109771	All Except Skin and Sex Cancer	Diagnosed 50 To 64	0.246	0.949793
ss74817170	rs17449032	All Except Skin and Sex Cancer	Diagnosed 50 To 64	0.274	0.949793
ss74819184	rs10083536	All Except Skin and Sex Cancer	Diagnosed 50 To 64	0.252	0.949793
ss74823828	rs7288979	All Except Skin and Sex Cancer	Diagnosed 50 To 64	0.272	0.949793
ss74824011	rs17526942	All Except Skin and Sex Cancer	Diagnosed 50 To 64	0.261	0.949793
ss74829524	rs4329748	All Except Skin and Sex Cancer	Diagnosed 50 To 64	0.247	0.949793
ss74829624	rs7025886	All Except Skin and Sex Cancer	Diagnosed 50 To 64	0.244	0.949793
ss74831140	rs2282806	All Except Skin and Sex Cancer	Diagnosed 50 To 64	0.274	0.949793
ss74831485	rs7465523	All Except Skin and Sex Cancer	Diagnosed 50 To 64	0.274	0.949793
ss74834308	rs17792118	All Except Skin and Sex Cancer	Diagnosed 50 To 64	0.258	0.949793
ss74837209	rs4681067	All Except Skin and Sex Cancer	Diagnosed 50 To 64	0.255	0.949793
ss74841904	rs10842914	All Except Skin and Sex Cancer	Diagnosed 50 To 64	0.272	0.949793
ss74841905	rs10735067	All Except Skin and Sex Cancer	Diagnosed 50 To 64	0.256	0.949793
ss74842325	rs11246007	All Except Skin and Sex Cancer	Diagnosed 50 To 64	0.257	0.949793
ss74845838	rs12492392	All Except Skin and Sex Cancer	Diagnosed 50 To 64	0.249	0.949793
ss74847353	rs6511867	All Except Skin and Sex Cancer	Diagnosed 50 To 64	0.262	0.949793
ss74850629	rs2076399	All Except Skin and Sex Cancer	Diagnosed 50 To 64	0.259	0.949793
ss74852216	rs13268778	All Except Skin and Sex Cancer	Diagnosed 50 To 64	0.251	0.949793
ss74806659	rs3742769	All Except Skin and Sex Cancer	Diagnosed 50 To 64	0.275	0.950875
ss74836584	rs300984	All Except Skin and Sex Cancer	Diagnosed 50 To 64	0.276	0.951003
ss74806364	rs3132453	All Except Skin and Sex Cancer	Diagnosed 50 To 64	0.298	0.951629
ss74807815	rs1804160	All Except Skin and Sex Cancer	Diagnosed 50 To 64	0.288	0.951629
ss74811498	rs6519993	All Except Skin and Sex Cancer	Diagnosed 50 To 64	0.28	0.951629
ss74815171	rs17495945	All Except Skin and Sex Cancer	Diagnosed 50 To 64	0.3	0.951629
ss74815219	rs16986337	All Except Skin and Sex Cancer	Diagnosed 50 To 64	0.298	0.951629
ss74818179	rs238775	All Except Skin and Sex Cancer	Diagnosed 50 To 64	0.286	0.951629
ss74820151	rs10972282	All Except Skin and Sex Cancer	Diagnosed 50 To 64	0.294	0.951629
ss74826058	rs17029657	All Except Skin and Sex Cancer	Diagnosed 50 To 64	0.298	0.951629
ss74827374	rs12429603	All Except Skin and Sex Cancer	Diagnosed 50 To 64	0.291	0.951629
ss74828552	rs3824730	All Except Skin and Sex Cancer	Diagnosed 50 To 64	0.296	0.951629
ss74829170	rs17520056	All Except Skin and Sex Cancer	Diagnosed 50 To 64	0.288	0.951629
ss74829993	rs10517002	All Except Skin and Sex Cancer	Diagnosed 50 To 64	0.281	0.951629
ss74833358	rs876430	All Except Skin and Sex Cancer	Diagnosed 50 To 64	0.298	0.951629
ss74836835	rs11705283	All Except Skin and Sex Cancer	Diagnosed 50 To 64	0.279	0.951629
ss74838978	rs7146340	All Except Skin and Sex Cancer	Diagnosed 50 To 64	0.294	0.951629
ss74843912	rs11843936	All Except Skin and Sex Cancer	Diagnosed 50 To 64	0.287	0.951629
ss74843932	rs2287497	All Except Skin and Sex Cancer	Diagnosed 50 To 64	0.282	0.951629
ss74847753	rs7838347	All Except Skin and Sex Cancer	Diagnosed 50 To 64	0.278	0.951629
ss74851082	rs4545058	All Except Skin and Sex Cancer	Diagnosed 50 To 64	0.296	0.951629
ss74851444	rs495490	All Except Skin and Sex Cancer	Diagnosed 50 To 64	0.298	0.951629
ss74854111	rs10025625	All Except Skin and Sex Cancer	Diagnosed 50 To 64	0.285	0.951629
ss74810222	rs144848	All Except Skin and Sex Cancer	Diagnosed 50 To 64	0.312	0.951806
ss74814070	rs2227935	All Except Skin and Sex Cancer	Diagnosed 50 To 64	0.306	0.951806
ss74825978	rs6714212	All Except Skin and Sex Cancer	Diagnosed 50 To 64	0.304	0.951806
ss74834745	rs2322718	All Except Skin and Sex Cancer	Diagnosed 50 To 64	0.31	0.951806
ss74837273	rs7982957	All Except Skin and Sex Cancer	Diagnosed 50 To 64	0.301	0.951806
ss74841653	rs12170612	All Except Skin and Sex Cancer	Diagnosed 50 To 64	0.306	0.951806
ss74841829	rs2881766	All Except Skin and Sex Cancer	Diagnosed 50 To 64	0.307	0.951806
ss74844411	rs12974011	All Except Skin and Sex Cancer	Diagnosed 50 To 64	0.31	0.951806
ss74845673	rs3917586	All Except Skin and Sex Cancer	Diagnosed 50 To 64	0.313	0.951806
ss74850564	rs2834280	All Except Skin and Sex Cancer	Diagnosed 50 To 64	0.302	0.951806
ss74852447	rs11760261	All Except Skin and Sex Cancer	Diagnosed 50 To 64	0.313	0.951806
ss74853006	rs10490595	All Except Skin and Sex Cancer	Diagnosed 50 To 64	0.306	0.951806
ss74808914	rs799917	All Except Skin and Sex Cancer	Diagnosed 50 To 64	0.314	0.951916
ss74820193	rs17082236	All Except Skin and Sex Cancer	Diagnosed 50 To 64	0.318	0.952453
ss74820753	rs17077568	All Except Skin and Sex Cancer	Diagnosed 50 To 64	0.319	0.952453
ss74820896	rs17077569	All Except Skin and Sex Cancer	Diagnosed 50 To 64	0.319	0.952453
ss74832924	rs9444584	All Except Skin and Sex Cancer	Diagnosed 50 To 64	0.319	0.952453
ss74837250	rs4986589	All Except Skin and Sex Cancer	Diagnosed 50 To 64	0.316	0.952453
ss74852891	rs503532	All Except Skin and Sex Cancer	Diagnosed 50 To 64	0.317	0.952453
ss74805923	rs707555	All Except Skin and Sex Cancer	Diagnosed 50 To 64	0.349	0.953541
ss74806043	rs1799966	All Except Skin and Sex Cancer	Diagnosed 50 To 64	0.322	0.953541
ss74806161	rs2228529	All Except Skin and Sex Cancer	Diagnosed 50 To 64	0.329	0.953541
ss74806227	rs11191274	All Except Skin and Sex Cancer	Diagnosed 50 To 64	0.387	0.953541
ss74806904	rs2297792	All Except Skin and Sex Cancer	Diagnosed 50 To 64	0.329	0.953541
ss74806931	rs11569017	All Except Skin and Sex Cancer	Diagnosed 50 To 64	0.405	0.953541
ss74807493	rs10853751	All Except Skin and Sex Cancer	Diagnosed 50 To 64	0.366	0.953541
ss74807967	rs1494555	All Except Skin and Sex Cancer	Diagnosed 50 To 64	0.36	0.953541
ss74808010	rs2291219	All Except Skin and Sex Cancer	Diagnosed 50 To 64	0.367	0.953541
ss74808053	rs1760897	All Except Skin and Sex Cancer	Diagnosed 50 To 64	0.393	0.953541
ss74808575	rs12656368	All Except Skin and Sex Cancer	Diagnosed 50 To 64	0.361	0.953541
ss74808832	rs7527596	All Except Skin and Sex Cancer	Diagnosed 50 To 64	0.389	0.953541
ss74809381	rs743923	All Except Skin and Sex Cancer	Diagnosed 50 To 64	0.38	0.953541
ss74809625	rs7830743	All Except Skin and Sex Cancer	Diagnosed 50 To 64	0.398	0.953541
ss74809627	rs1130409	All Except Skin and Sex Cancer	Diagnosed 50 To 64	0.38	0.953541
ss74809911	rs2230009	All Except Skin and Sex Cancer	Diagnosed 50 To 64	0.327	0.953541
ss74810115	rs4816	All Except Skin and Sex Cancer	Diagnosed 50 To 64	0.362	0.953541
ss74810659	rs7549215	All Except Skin and Sex Cancer	Diagnosed 50 To 64	0.376	0.953541
ss74812023	rs766425	All Except Skin and Sex Cancer	Diagnosed 50 To 64	0.333	0.953541
ss74813364	rs8130507	All Except Skin and Sex Cancer	Diagnosed 50 To 64	0.404	0.953541
ss74813635	rs4986850	All Except Skin and Sex Cancer	Diagnosed 50 To 64	0.394	0.953541
ss74814603	rs12254856	All Except Skin and Sex Cancer	Diagnosed 50 To 64	0.34	0.953541
ss74815315	rs12032272	All Except Skin and Sex Cancer	Diagnosed 50 To 64	0.389	0.953541
ss74815483	rs9764398	All Except Skin and Sex Cancer	Diagnosed 50 To 64	0.373	0.953541
ss74816615	rs11671617	All Except Skin and Sex Cancer	Diagnosed 50 To 64	0.405	0.953541
ss74818184	rs11549465	All Except Skin and Sex Cancer	Diagnosed 50 To 64	0.327	0.953541
ss74818528	rs936018	All Except Skin and Sex Cancer	Diagnosed 50 To 64	0.388	0.953541
ss74820980	rs662	All Except Skin and Sex Cancer	Diagnosed 50 To 64	0.324	0.953541
ss74821242	rs6123711	All Except Skin and Sex Cancer	Diagnosed 50 To 64	0.379	0.953541
ss74822257	rs6682611	All Except Skin and Sex Cancer	Diagnosed 50 To 64	0.406	0.953541
ss74822467	rs12421762	All Except Skin and Sex Cancer	Diagnosed 50 To 64	0.323	0.953541
ss74823157	rs904647	All Except Skin and Sex Cancer	Diagnosed 50 To 64	0.405	0.953541
ss74823806	rs12065184	All Except Skin and Sex Cancer	Diagnosed 50 To 64	0.405	0.953541
ss74823877	rs9610695	All Except Skin and Sex Cancer	Diagnosed 50 To 64	0.402	0.953541
ss74824337	rs788754	All Except Skin and Sex Cancer	Diagnosed 50 To 64	0.404	0.953541
ss74824622	rs172043	All Except Skin and Sex Cancer	Diagnosed 50 To 64	0.357	0.953541
ss74824648	rs899653	All Except Skin and Sex Cancer	Diagnosed 50 To 64	0.328	0.953541
ss74824838	rs4406451	All Except Skin and Sex Cancer	Diagnosed 50 To 64	0.371	0.953541
ss74824896	rs1597568	All Except Skin and Sex Cancer	Diagnosed 50 To 64	0.346	0.953541
ss74825273	rs565093	All Except Skin and Sex Cancer	Diagnosed 50 To 64	0.387	0.953541
ss74825880	rs4258837	All Except Skin and Sex Cancer	Diagnosed 50 To 64	0.394	0.953541
ss74826189	rs12544802	All Except Skin and Sex Cancer	Diagnosed 50 To 64	0.392	0.953541
ss74829545	rs831007	All Except Skin and Sex Cancer	Diagnosed 50 To 64	0.378	0.953541
ss74829918	rs1997703	All Except Skin and Sex Cancer	Diagnosed 50 To 64	0.349	0.953541
ss74830403	rs13207511	All Except Skin and Sex Cancer	Diagnosed 50 To 64	0.374	0.953541
ss74830853	rs6984111	All Except Skin and Sex Cancer	Diagnosed 50 To 64	0.333	0.953541
ss74831740	rs7971382	All Except Skin and Sex Cancer	Diagnosed 50 To 64	0.404	0.953541
ss74831750	rs8138102	All Except Skin and Sex Cancer	Diagnosed 50 To 64	0.332	0.953541
ss74832532	rs7000959	All Except Skin and Sex Cancer	Diagnosed 50 To 64	0.352	0.953541
ss74832742	rs12414948	All Except Skin and Sex Cancer	Diagnosed 50 To 64	0.376	0.953541
ss74832778	rs2545025	All Except Skin and Sex Cancer	Diagnosed 50 To 64	0.38	0.953541
ss74833309	rs7997595	All Except Skin and Sex Cancer	Diagnosed 50 To 64	0.388	0.953541
ss74833319	rs9927820	All Except Skin and Sex Cancer	Diagnosed 50 To 64	0.334	0.953541
ss74833610	rs2142097	All Except Skin and Sex Cancer	Diagnosed 50 To 64	0.394	0.953541
ss74833626	rs830966	All Except Skin and Sex Cancer	Diagnosed 50 To 64	0.384	0.953541
ss74834853	rs12526712	All Except Skin and Sex Cancer	Diagnosed 50 To 64	0.351	0.953541
ss74835167	rs2057070	All Except Skin and Sex Cancer	Diagnosed 50 To 64	0.371	0.953541
ss74835310	rs11617752	All Except Skin and Sex Cancer	Diagnosed 50 To 64	0.385	0.953541
ss74836020	rs2071023	All Except Skin and Sex Cancer	Diagnosed 50 To 64	0.385	0.953541
ss74836167	rs7711960	All Except Skin and Sex Cancer	Diagnosed 50 To 64	0.365	0.953541
ss74836216	rs11847466	All Except Skin and Sex Cancer	Diagnosed 50 To 64	0.379	0.953541
ss74836316	rs13075375	All Except Skin and Sex Cancer	Diagnosed 50 To 64	0.398	0.953541
ss74836451	rs12546017	All Except Skin and Sex Cancer	Diagnosed 50 To 64	0.39	0.953541
ss74836676	rs2292979	All Except Skin and Sex Cancer	Diagnosed 50 To 64	0.34	0.953541
ss74839306	rs2277694	All Except Skin and Sex Cancer	Diagnosed 50 To 64	0.356	0.953541
ss74840052	rs11595119	All Except Skin and Sex Cancer	Diagnosed 50 To 64	0.344	0.953541
ss74841134	rs9626730	All Except Skin and Sex Cancer	Diagnosed 50 To 64	0.377	0.953541
ss74841291	rs380417	All Except Skin and Sex Cancer	Diagnosed 50 To 64	0.383	0.953541
ss74841498	rs4792825	All Except Skin and Sex Cancer	Diagnosed 50 To 64	0.382	0.953541
ss74842864	rs2098684	All Except Skin and Sex Cancer	Diagnosed 50 To 64	0.359	0.953541
ss74845516	rs2249381	All Except Skin and Sex Cancer	Diagnosed 50 To 64	0.367	0.953541
ss74846770	rs7251786	All Except Skin and Sex Cancer	Diagnosed 50 To 64	0.363	0.953541
ss74847242	rs6601431	All Except Skin and Sex Cancer	Diagnosed 50 To 64	0.382	0.953541
ss74847405	rs1802061	All Except Skin and Sex Cancer	Diagnosed 50 To 64	0.35	0.953541
ss74848808	rs13228494	All Except Skin and Sex Cancer	Diagnosed 50 To 64	0.357	0.953541
ss74851252	rs11919783	All Except Skin and Sex Cancer	Diagnosed 50 To 64	0.369	0.953541
ss74852213	rs2551402	All Except Skin and Sex Cancer	Diagnosed 50 To 64	0.385	0.953541
ss74852235	rs129600	All Except Skin and Sex Cancer	Diagnosed 50 To 64	0.39	0.953541
ss74852243	rs11102922	All Except Skin and Sex Cancer	Diagnosed 50 To 64	0.341	0.953541
ss74852518	rs9322332	All Except Skin and Sex Cancer	Diagnosed 50 To 64	0.404	0.953541
ss74852659	rs480575	All Except Skin and Sex Cancer	Diagnosed 50 To 64	0.381	0.953541
ss74853460	rs3853251	All Except Skin and Sex Cancer	Diagnosed 50 To 64	0.334	0.953541
ss74853616	rs9518861	All Except Skin and Sex Cancer	Diagnosed 50 To 64	0.377	0.953541
ss74854240	rs10183143	All Except Skin and Sex Cancer	Diagnosed 50 To 64	0.388	0.953541
ss74854628	rs350887	All Except Skin and Sex Cancer	Diagnosed 50 To 64	0.349	0.953541
ss74836579	rs6070187	All Except Skin and Sex Cancer	Diagnosed 50 To 64	0.407	0.954592
ss74844493	rs11719667	All Except Skin and Sex Cancer	Diagnosed 50 To 64	0.407	0.954592
ss74807111	rs1138272	All Except Skin and Sex Cancer	Diagnosed 50 To 64	0.409	0.95507
ss74848338	rs13211987	All Except Skin and Sex Cancer	Diagnosed 50 To 64	0.409	0.95507
ss74825654	rs10774223	All Except Skin and Sex Cancer	Diagnosed 50 To 64	0.41	0.955147
ss74828620	rs12610763	All Except Skin and Sex Cancer	Diagnosed 50 To 64	0.411	0.955544
ss74832507	rs17179419	All Except Skin and Sex Cancer	Diagnosed 50 To 64	0.411	0.955544
ss74816128	rs6856	All Except Skin and Sex Cancer	Diagnosed 50 To 64	0.416	0.95694
ss74828781	rs10456443	All Except Skin and Sex Cancer	Diagnosed 50 To 64	0.414	0.95694
ss74835747	rs11155806	All Except Skin and Sex Cancer	Diagnosed 50 To 64	0.413	0.95694
ss74849229	rs9534156	All Except Skin and Sex Cancer	Diagnosed 50 To 64	0.415	0.95694
ss74851268	rs13380176	All Except Skin and Sex Cancer	Diagnosed 50 To 64	0.412	0.95694
ss74807428	rs13317	All Except Skin and Sex Cancer	Diagnosed 50 To 64	0.418	0.957783
ss74837087	rs2041646	All Except Skin and Sex Cancer	Diagnosed 50 To 64	0.419	0.957783
ss74844704	rs456514	All Except Skin and Sex Cancer	Diagnosed 50 To 64	0.42	0.957783
ss74814474	rs10972281	All Except Skin and Sex Cancer	Diagnosed 50 To 64	0.423	0.958681
ss74828963	rs6000634	All Except Skin and Sex Cancer	Diagnosed 50 To 64	0.423	0.958681
ss74831558	rs9397463	All Except Skin and Sex Cancer	Diagnosed 50 To 64	0.424	0.958681
ss74846045	rs9397486	All Except Skin and Sex Cancer	Diagnosed 50 To 64	0.424	0.958681
ss74813034	rs10471774	All Except Skin and Sex Cancer	Diagnosed 50 To 64	0.427	0.958877
ss74844461	rs10256620	All Except Skin and Sex Cancer	Diagnosed 50 To 64	0.425	0.958877
ss74822136	rs2284445	All Except Skin and Sex Cancer	Diagnosed 50 To 64	0.428	0.959875
ss74812243	rs1571070	All Except Skin and Sex Cancer	Diagnosed 50 To 64	0.429	0.961182
ss74808227	rs2736182	All Except Skin and Sex Cancer	Diagnosed 50 To 64	0.43	0.961553
ss74828676	rs11787370	All Except Skin and Sex Cancer	Diagnosed 50 To 64	0.43	0.961553
ss74806156	rs7955866	All Except Skin and Sex Cancer	Diagnosed 50 To 64	0.445	0.961816
ss74806494	rs16942	All Except Skin and Sex Cancer	Diagnosed 50 To 64	0.456	0.961816
ss74807817	rs6025606	All Except Skin and Sex Cancer	Diagnosed 50 To 64	0.451	0.961816
ss74808432	rs11568943	All Except Skin and Sex Cancer	Diagnosed 50 To 64	0.447	0.961816
ss74808978	rs2217332	All Except Skin and Sex Cancer	Diagnosed 50 To 64	0.455	0.961816
ss74810721	rs1445898	All Except Skin and Sex Cancer	Diagnosed 50 To 64	0.454	0.961816
ss74811214	rs641320	All Except Skin and Sex Cancer	Diagnosed 50 To 64	0.441	0.961816
ss74814234	rs1801516	All Except Skin and Sex Cancer	Diagnosed 50 To 64	0.438	0.961816
ss74815195	rs2071307	All Except Skin and Sex Cancer	Diagnosed 50 To 64	0.451	0.961816
ss74815739	rs17763658	All Except Skin and Sex Cancer	Diagnosed 50 To 64	0.444	0.961816
ss74815818	rs12973246	All Except Skin and Sex Cancer	Diagnosed 50 To 64	0.456	0.961816
ss74818655	rs3917221	All Except Skin and Sex Cancer	Diagnosed 50 To 64	0.45	0.961816
ss74819976	rs1800777	All Except Skin and Sex Cancer	Diagnosed 50 To 64	0.442	0.961816
ss74820180	rs25667	All Except Skin and Sex Cancer	Diagnosed 50 To 64	0.445	0.961816
ss74822356	rs317913	All Except Skin and Sex Cancer	Diagnosed 50 To 64	0.454	0.961816
ss74823109	rs1213371	All Except Skin and Sex Cancer	Diagnosed 50 To 64	0.453	0.961816
ss74823854	rs2813549	All Except Skin and Sex Cancer	Diagnosed 50 To 64	0.432	0.961816
ss74823953	rs1465693	All Except Skin and Sex Cancer	Diagnosed 50 To 64	0.447	0.961816
ss74831833	rs1862263	All Except Skin and Sex Cancer	Diagnosed 50 To 64	0.45	0.961816
ss74832806	rs1319859	All Except Skin and Sex Cancer	Diagnosed 50 To 64	0.454	0.961816
ss74833227	rs3773747	All Except Skin and Sex Cancer	Diagnosed 50 To 64	0.448	0.961816
ss74834097	rs17159769	All Except Skin and Sex Cancer	Diagnosed 50 To 64	0.442	0.961816
ss74836418	rs17725712	All Except Skin and Sex Cancer	Diagnosed 50 To 64	0.446	0.961816
ss74840927	rs4841324	All Except Skin and Sex Cancer	Diagnosed 50 To 64	0.431	0.961816
ss74846239	rs12167378	All Except Skin and Sex Cancer	Diagnosed 50 To 64	0.441	0.961816
ss74848662	rs11776693	All Except Skin and Sex Cancer	Diagnosed 50 To 64	0.452	0.961816
ss74850916	rs9649847	All Except Skin and Sex Cancer	Diagnosed 50 To 64	0.436	0.961816
ss74851590	rs11841502	All Except Skin and Sex Cancer	Diagnosed 50 To 64	0.454	0.961816
ss74852792	rs9808108	All Except Skin and Sex Cancer	Diagnosed 50 To 64	0.442	0.961816
ss74854318	rs4791049	All Except Skin and Sex Cancer	Diagnosed 50 To 64	0.433	0.961816
ss74853256	rs1560333	All Except Skin and Sex Cancer	Diagnosed 50 To 64	0.461	0.962959
ss74816416	rs3810434	All Except Skin and Sex Cancer	Diagnosed 50 To 64	0.469	0.964561
ss74822202	rs3744231	All Except Skin and Sex Cancer	Diagnosed 50 To 64	0.47	0.964561
ss74834126	rs17415614	All Except Skin and Sex Cancer	Diagnosed 50 To 64	0.47	0.964561
ss74832317	rs2037128	All Except Skin and Sex Cancer	Diagnosed 50 To 64	0.473	0.965272
ss74843583	rs519825	All Except Skin and Sex Cancer	Diagnosed 50 To 64	0.473	0.965272
ss74811810	rs2227928	All Except Skin and Sex Cancer	Diagnosed 50 To 64	0.475	0.965647
ss74846235	rs7677000	All Except Skin and Sex Cancer	Diagnosed 50 To 64	0.475	0.965647
ss74850690	rs7396243	All Except Skin and Sex Cancer	Diagnosed 50 To 64	0.475	0.965647
ss74839801	rs10460157	All Except Skin and Sex Cancer	Diagnosed 50 To 64	0.476	0.966063
ss74829722	rs10821841	All Except Skin and Sex Cancer	Diagnosed 50 To 64	0.479	0.966389
ss74831537	rs10152173	All Except Skin and Sex Cancer	Diagnosed 50 To 64	0.479	0.966389
ss74806905	rs7535144	All Except Skin and Sex Cancer	Diagnosed 50 To 64	0.48	0.966407
ss74808966	rs6091179	All Except Skin and Sex Cancer	Diagnosed 50 To 64	0.482	0.966407
ss74822427	rs659366	All Except Skin and Sex Cancer	Diagnosed 50 To 64	0.482	0.966407
ss74822438	rs12905386	All Except Skin and Sex Cancer	Diagnosed 50 To 64	0.486	0.966407
ss74831947	rs13074111	All Except Skin and Sex Cancer	Diagnosed 50 To 64	0.486	0.966407
ss74839510	rs5996631	All Except Skin and Sex Cancer	Diagnosed 50 To 64	0.483	0.966407
ss74841573	rs4636677	All Except Skin and Sex Cancer	Diagnosed 50 To 64	0.481	0.966407
ss74842754	rs2176085	All Except Skin and Sex Cancer	Diagnosed 50 To 64	0.488	0.966769
ss74807208	rs1126497	All Except Skin and Sex Cancer	Diagnosed 50 To 64	0.489	0.966794
ss74807348	rs1048945	All Except Skin and Sex Cancer	Diagnosed 50 To 64	0.491	0.966794
ss74814521	rs13157845	All Except Skin and Sex Cancer	Diagnosed 50 To 64	0.5	0.966794
ss74822134	rs1125156	All Except Skin and Sex Cancer	Diagnosed 50 To 64	0.491	0.966794
ss74822976	rs9900373	All Except Skin and Sex Cancer	Diagnosed 50 To 64	0.498	0.966794
ss74826263	rs806377	All Except Skin and Sex Cancer	Diagnosed 50 To 64	0.492	0.966794
ss74831538	rs9369421	All Except Skin and Sex Cancer	Diagnosed 50 To 64	0.501	0.966794
ss74832646	rs10409667	All Except Skin and Sex Cancer	Diagnosed 50 To 64	0.499	0.966794
ss74836103	rs12206050	All Except Skin and Sex Cancer	Diagnosed 50 To 64	0.5	0.966794
ss74849761	rs3112518	All Except Skin and Sex Cancer	Diagnosed 50 To 64	0.502	0.966794
ss74851337	rs11776228	All Except Skin and Sex Cancer	Diagnosed 50 To 64	0.493	0.966794
ss74852497	rs2760482	All Except Skin and Sex Cancer	Diagnosed 50 To 64	0.502	0.966794
ss74853476	rs3770507	All Except Skin and Sex Cancer	Diagnosed 50 To 64	0.501	0.966794
ss74806791	rs956868	All Except Skin and Sex Cancer	Diagnosed 50 To 64	0.565	0.96855
ss74806877	rs2071307	All Except Skin and Sex Cancer	Diagnosed 50 To 64	0.512	0.96855
ss74807628	rs303061	All Except Skin and Sex Cancer	Diagnosed 50 To 64	0.537	0.96855
ss74807660	rs7020782	All Except Skin and Sex Cancer	Diagnosed 50 To 64	0.556	0.96855
ss74808776	rs11229	All Except Skin and Sex Cancer	Diagnosed 50 To 64	0.534	0.96855
ss74808855	rs764205	All Except Skin and Sex Cancer	Diagnosed 50 To 64	0.53	0.96855
ss74809470	rs1800067	All Except Skin and Sex Cancer	Diagnosed 50 To 64	0.509	0.96855
ss74810218	rs3752448	All Except Skin and Sex Cancer	Diagnosed 50 To 64	0.544	0.96855
ss74810722	rs1494558	All Except Skin and Sex Cancer	Diagnosed 50 To 64	0.559	0.96855
ss74811304	rs9536314	All Except Skin and Sex Cancer	Diagnosed 50 To 64	0.568	0.96855
ss74811892	rs16027	All Except Skin and Sex Cancer	Diagnosed 50 To 64	0.519	0.96855
ss74812228	rs4903104	All Except Skin and Sex Cancer	Diagnosed 50 To 64	0.563	0.96855
ss74812308	rs10445337	All Except Skin and Sex Cancer	Diagnosed 50 To 64	0.508	0.96855
ss74812768	rs4667591	All Except Skin and Sex Cancer	Diagnosed 50 To 64	0.558	0.96855
ss74813613	rs11953029	All Except Skin and Sex Cancer	Diagnosed 50 To 64	0.563	0.96855
ss74813863	rs1047769	All Except Skin and Sex Cancer	Diagnosed 50 To 64	0.553	0.96855
ss74814987	rs11531	All Except Skin and Sex Cancer	Diagnosed 50 To 64	0.573	0.96855
ss74816654	rs12225230	All Except Skin and Sex Cancer	Diagnosed 50 To 64	0.522	0.96855
ss74816892	rs17507841	All Except Skin and Sex Cancer	Diagnosed 50 To 64	0.52	0.96855
ss74818017	rs3755447	All Except Skin and Sex Cancer	Diagnosed 50 To 64	0.545	0.96855
ss74818421	rs7074847	All Except Skin and Sex Cancer	Diagnosed 50 To 64	0.527	0.96855
ss74822807	rs7844115	All Except Skin and Sex Cancer	Diagnosed 50 To 64	0.512	0.96855
ss74823014	rs2684787	All Except Skin and Sex Cancer	Diagnosed 50 To 64	0.571	0.96855
ss74823143	rs8108097	All Except Skin and Sex Cancer	Diagnosed 50 To 64	0.57	0.96855
ss74823322	rs761779	All Except Skin and Sex Cancer	Diagnosed 50 To 64	0.573	0.96855
ss74824481	rs7469968	All Except Skin and Sex Cancer	Diagnosed 50 To 64	0.547	0.96855
ss74824741	rs765840	All Except Skin and Sex Cancer	Diagnosed 50 To 64	0.551	0.96855
ss74825039	rs2240780	All Except Skin and Sex Cancer	Diagnosed 50 To 64	0.533	0.96855
ss74825360	rs10949835	All Except Skin and Sex Cancer	Diagnosed 50 To 64	0.578	0.96855
ss74826099	rs1061621	All Except Skin and Sex Cancer	Diagnosed 50 To 64	0.508	0.96855
ss74826532	rs541955	All Except Skin and Sex Cancer	Diagnosed 50 To 64	0.573	0.96855
ss74827918	rs10759398	All Except Skin and Sex Cancer	Diagnosed 50 To 64	0.518	0.96855
ss74828658	rs757232	All Except Skin and Sex Cancer	Diagnosed 50 To 64	0.526	0.96855
ss74828825	rs2071575	All Except Skin and Sex Cancer	Diagnosed 50 To 64	0.518	0.96855
ss74828957	rs1997791	All Except Skin and Sex Cancer	Diagnosed 50 To 64	0.537	0.96855
ss74829216	rs727877	All Except Skin and Sex Cancer	Diagnosed 50 To 64	0.554	0.96855
ss74829444	rs11621511	All Except Skin and Sex Cancer	Diagnosed 50 To 64	0.53	0.96855
ss74832605	rs2239622	All Except Skin and Sex Cancer	Diagnosed 50 To 64	0.505	0.96855
ss74834090	rs10093273	All Except Skin and Sex Cancer	Diagnosed 50 To 64	0.53	0.96855
ss74835005	rs12451026	All Except Skin and Sex Cancer	Diagnosed 50 To 64	0.515	0.96855
ss74836112	rs3793786	All Except Skin and Sex Cancer	Diagnosed 50 To 64	0.515	0.96855
ss74836341	rs11766515	All Except Skin and Sex Cancer	Diagnosed 50 To 64	0.542	0.96855
ss74837015	rs6964272	All Except Skin and Sex Cancer	Diagnosed 50 To 64	0.566	0.96855
ss74838553	rs17320841	All Except Skin and Sex Cancer	Diagnosed 50 To 64	0.506	0.96855
ss74838613	rs10489431	All Except Skin and Sex Cancer	Diagnosed 50 To 64	0.536	0.96855
ss74839686	rs1109850	All Except Skin and Sex Cancer	Diagnosed 50 To 64	0.53	0.96855
ss74840171	rs9480865	All Except Skin and Sex Cancer	Diagnosed 50 To 64	0.534	0.96855
ss74840271	rs4821595	All Except Skin and Sex Cancer	Diagnosed 50 To 64	0.565	0.96855
ss74841181	rs4429607	All Except Skin and Sex Cancer	Diagnosed 50 To 64	0.542	0.96855
ss74841407	rs3025780	All Except Skin and Sex Cancer	Diagnosed 50 To 64	0.576	0.96855
ss74841534	rs2975647	All Except Skin and Sex Cancer	Diagnosed 50 To 64	0.563	0.96855
ss74841986	rs13099828	All Except Skin and Sex Cancer	Diagnosed 50 To 64	0.567	0.96855
ss74842404	rs11249994	All Except Skin and Sex Cancer	Diagnosed 50 To 64	0.516	0.96855
ss74843374	rs3761353	All Except Skin and Sex Cancer	Diagnosed 50 To 64	0.575	0.96855
ss74843516	rs7245579	All Except Skin and Sex Cancer	Diagnosed 50 To 64	0.537	0.96855
ss74845312	rs9513116	All Except Skin and Sex Cancer	Diagnosed 50 To 64	0.525	0.96855
ss74846841	rs12236532	All Except Skin and Sex Cancer	Diagnosed 50 To 64	0.538	0.96855
ss74847174	rs1510955	All Except Skin and Sex Cancer	Diagnosed 50 To 64	0.518	0.96855
ss74847599	rs4926252	All Except Skin and Sex Cancer	Diagnosed 50 To 64	0.527	0.96855
ss74848257	rs728064	All Except Skin and Sex Cancer	Diagnosed 50 To 64	0.551	0.96855
ss74848945	rs1813323	All Except Skin and Sex Cancer	Diagnosed 50 To 64	0.562	0.96855
ss74850232	rs2830036	All Except Skin and Sex Cancer	Diagnosed 50 To 64	0.559	0.96855
ss74850483	rs2290036	All Except Skin and Sex Cancer	Diagnosed 50 To 64	0.561	0.96855
ss74850561	rs17516906	All Except Skin and Sex Cancer	Diagnosed 50 To 64	0.528	0.96855
ss74851290	rs2045709	All Except Skin and Sex Cancer	Diagnosed 50 To 64	0.555	0.96855
ss74851822	rs12588378	All Except Skin and Sex Cancer	Diagnosed 50 To 64	0.557	0.96855
ss74852546	rs1052990	All Except Skin and Sex Cancer	Diagnosed 50 To 64	0.552	0.96855
ss74854771	rs3800827	All Except Skin and Sex Cancer	Diagnosed 50 To 64	0.533	0.96855
ss74818825	rs4534095	All Except Skin and Sex Cancer	Diagnosed 50 To 64	0.582	0.969813
ss74814353	rs7145318	All Except Skin and Sex Cancer	Diagnosed 50 To 64	0.584	0.970572
ss74815898	rs17651549	All Except Skin and Sex Cancer	Diagnosed 50 To 64	0.584	0.970572
ss74817110	rs3969860	All Except Skin and Sex Cancer	Diagnosed 50 To 64	0.587	0.970889
ss74829487	rs12584136	All Except Skin and Sex Cancer	Diagnosed 50 To 64	0.592	0.972642
ss74846724	rs2274760	All Except Skin and Sex Cancer	Diagnosed 50 To 64	0.592	0.972642
ss74806138	rs11953798	All Except Skin and Sex Cancer	Diagnosed 50 To 64	0.594	0.973152
ss74837760	rs11722069	All Except Skin and Sex Cancer	Diagnosed 50 To 64	0.596	0.973659
ss74839853	rs244468	All Except Skin and Sex Cancer	Diagnosed 50 To 64	0.596	0.973659
ss74807782	rs6707475	All Except Skin and Sex Cancer	Diagnosed 50 To 64	0.599	0.974153
ss74817808	rs4147918	All Except Skin and Sex Cancer	Diagnosed 50 To 64	0.607	0.974153
ss74825032	rs2159173	All Except Skin and Sex Cancer	Diagnosed 50 To 64	0.605	0.974153
ss74825812	rs1882928	All Except Skin and Sex Cancer	Diagnosed 50 To 64	0.604	0.974153
ss74826423	rs6799331	All Except Skin and Sex Cancer	Diagnosed 50 To 64	0.598	0.974153
ss74834675	rs10503927	All Except Skin and Sex Cancer	Diagnosed 50 To 64	0.604	0.974153
ss74835763	rs7716228	All Except Skin and Sex Cancer	Diagnosed 50 To 64	0.597	0.974153
ss74806316	rs12717	All Except Skin and Sex Cancer	Diagnosed 50 To 64	0.609	0.974421
ss74808952	rs11246020	All Except Skin and Sex Cancer	Diagnosed 50 To 64	0.609	0.974421
ss74822125	rs11780592	All Except Skin and Sex Cancer	Diagnosed 50 To 64	0.61	0.974421
ss74824791	rs1190592	All Except Skin and Sex Cancer	Diagnosed 50 To 64	0.61	0.974421
ss74854082	rs2849377	All Except Skin and Sex Cancer	Diagnosed 50 To 64	0.61	0.974421
ss74825162	rs4987825	All Except Skin and Sex Cancer	Diagnosed 50 To 64	0.611	0.974892
ss74827939	rs17758399	All Except Skin and Sex Cancer	Diagnosed 50 To 64	0.612	0.975137
ss74828727	rs2297231	All Except Skin and Sex Cancer	Diagnosed 50 To 64	0.612	0.975137
ss74833103	rs7296285	All Except Skin and Sex Cancer	Diagnosed 50 To 64	0.614	0.975849
ss74806105	rs999813	All Except Skin and Sex Cancer	Diagnosed 50 To 64	0.627	0.976563
ss74807049	rs1128127	All Except Skin and Sex Cancer	Diagnosed 50 To 64	0.635	0.976563
ss74811272	rs766173	All Except Skin and Sex Cancer	Diagnosed 50 To 64	0.623	0.976563
ss74814434	rs12973496	All Except Skin and Sex Cancer	Diagnosed 50 To 64	0.641	0.976563
ss74814842	rs11076159	All Except Skin and Sex Cancer	Diagnosed 50 To 64	0.634	0.976563
ss74823076	rs4790849	All Except Skin and Sex Cancer	Diagnosed 50 To 64	0.623	0.976563
ss74823140	rs11757832	All Except Skin and Sex Cancer	Diagnosed 50 To 64	0.624	0.976563
ss74826297	rs7969751	All Except Skin and Sex Cancer	Diagnosed 50 To 64	0.636	0.976563
ss74827301	rs3781207	All Except Skin and Sex Cancer	Diagnosed 50 To 64	0.63	0.976563
ss74828513	rs2426158	All Except Skin and Sex Cancer	Diagnosed 50 To 64	0.636	0.976563
ss74829903	rs2829916	All Except Skin and Sex Cancer	Diagnosed 50 To 64	0.642	0.976563
ss74831116	rs867512	All Except Skin and Sex Cancer	Diagnosed 50 To 64	0.626	0.976563
ss74831779	rs3750749	All Except Skin and Sex Cancer	Diagnosed 50 To 64	0.621	0.976563
ss74832355	rs1635404	All Except Skin and Sex Cancer	Diagnosed 50 To 64	0.618	0.976563
ss74833546	rs12654225	All Except Skin and Sex Cancer	Diagnosed 50 To 64	0.628	0.976563
ss74834264	rs2919384	All Except Skin and Sex Cancer	Diagnosed 50 To 64	0.619	0.976563
ss74834538	rs4784745	All Except Skin and Sex Cancer	Diagnosed 50 To 64	0.62	0.976563
ss74837679	rs458358	All Except Skin and Sex Cancer	Diagnosed 50 To 64	0.64	0.976563
ss74848527	rs2246022	All Except Skin and Sex Cancer	Diagnosed 50 To 64	0.627	0.976563
ss74851074	rs12444804	All Except Skin and Sex Cancer	Diagnosed 50 To 64	0.621	0.976563
ss74806562	rs6180	All Except Skin and Sex Cancer	Diagnosed 50 To 64	0.644	0.976888
ss74808280	rs2227956	All Except Skin and Sex Cancer	Diagnosed 50 To 64	0.655	0.976888
ss74814745	rs2276583	All Except Skin and Sex Cancer	Diagnosed 50 To 64	0.658	0.976888
ss74815696	rs6913643	All Except Skin and Sex Cancer	Diagnosed 50 To 64	0.654	0.976888
ss74818335	rs12609001	All Except Skin and Sex Cancer	Diagnosed 50 To 64	0.651	0.976888
ss74819048	rs1346044	All Except Skin and Sex Cancer	Diagnosed 50 To 64	0.654	0.976888
ss74823240	rs464884	All Except Skin and Sex Cancer	Diagnosed 50 To 64	0.649	0.976888
ss74824051	rs6003911	All Except Skin and Sex Cancer	Diagnosed 50 To 64	0.654	0.976888
ss74828867	rs9804485	All Except Skin and Sex Cancer	Diagnosed 50 To 64	0.649	0.976888
ss74829243	rs135551	All Except Skin and Sex Cancer	Diagnosed 50 To 64	0.646	0.976888
ss74830473	rs6577059	All Except Skin and Sex Cancer	Diagnosed 50 To 64	0.662	0.976888
ss74832221	rs294185	All Except Skin and Sex Cancer	Diagnosed 50 To 64	0.652	0.976888
ss74833876	rs12997281	All Except Skin and Sex Cancer	Diagnosed 50 To 64	0.657	0.976888
ss74836654	rs17447091	All Except Skin and Sex Cancer	Diagnosed 50 To 64	0.645	0.976888
ss74839982	rs4771644	All Except Skin and Sex Cancer	Diagnosed 50 To 64	0.655	0.976888
ss74844317	rs17151147	All Except Skin and Sex Cancer	Diagnosed 50 To 64	0.651	0.976888
ss74845057	rs17057406	All Except Skin and Sex Cancer	Diagnosed 50 To 64	0.66	0.976888
ss74847382	rs352080	All Except Skin and Sex Cancer	Diagnosed 50 To 64	0.657	0.976888
ss74807867	rs3809482	All Except Skin and Sex Cancer	Diagnosed 50 To 64	0.668	0.976997
ss74808228	rs2516489	All Except Skin and Sex Cancer	Diagnosed 50 To 64	0.665	0.976997
ss74820757	rs11656253	All Except Skin and Sex Cancer	Diagnosed 50 To 64	0.663	0.976997
ss74823286	rs768775	All Except Skin and Sex Cancer	Diagnosed 50 To 64	0.665	0.976997
ss74826708	rs2299260	All Except Skin and Sex Cancer	Diagnosed 50 To 64	0.665	0.976997
ss74839099	rs7731163	All Except Skin and Sex Cancer	Diagnosed 50 To 64	0.663	0.976997
ss74840849	rs4150355	All Except Skin and Sex Cancer	Diagnosed 50 To 64	0.669	0.976997
ss74843820	rs11802954	All Except Skin and Sex Cancer	Diagnosed 50 To 64	0.667	0.976997
ss74845283	rs6872252	All Except Skin and Sex Cancer	Diagnosed 50 To 64	0.664	0.976997
ss74848308	rs11145164	All Except Skin and Sex Cancer	Diagnosed 50 To 64	0.665	0.976997
ss74851215	rs612556	All Except Skin and Sex Cancer	Diagnosed 50 To 64	0.665	0.976997
ss74853601	rs7166852	All Except Skin and Sex Cancer	Diagnosed 50 To 64	0.669	0.976997
ss74829691	rs8062645	All Except Skin and Sex Cancer	Diagnosed 50 To 64	0.67	0.977219
ss74806378	rs10813831	All Except Skin and Sex Cancer	Diagnosed 50 To 64	0.677	0.97783
ss74806591	rs3735782	All Except Skin and Sex Cancer	Diagnosed 50 To 64	0.676	0.97783
ss74810802	rs2228526	All Except Skin and Sex Cancer	Diagnosed 50 To 64	0.673	0.97783
ss74823026	rs12987817	All Except Skin and Sex Cancer	Diagnosed 50 To 64	0.679	0.97783
ss74827287	rs6900496	All Except Skin and Sex Cancer	Diagnosed 50 To 64	0.682	0.97783
ss74829802	rs2815164	All Except Skin and Sex Cancer	Diagnosed 50 To 64	0.681	0.97783
ss74832444	rs11202596	All Except Skin and Sex Cancer	Diagnosed 50 To 64	0.675	0.97783
ss74836250	rs2302535	All Except Skin and Sex Cancer	Diagnosed 50 To 64	0.674	0.97783
ss74838730	rs2211771	All Except Skin and Sex Cancer	Diagnosed 50 To 64	0.681	0.97783
ss74839807	rs4469064	All Except Skin and Sex Cancer	Diagnosed 50 To 64	0.677	0.97783
ss74841509	rs1986601	All Except Skin and Sex Cancer	Diagnosed 50 To 64	0.677	0.97783
ss74843769	rs2978073	All Except Skin and Sex Cancer	Diagnosed 50 To 64	0.677	0.97783
ss74851721	rs12883097	All Except Skin and Sex Cancer	Diagnosed 50 To 64	0.684	0.97783
ss74852683	rs2967646	All Except Skin and Sex Cancer	Diagnosed 50 To 64	0.679	0.97783
ss74853088	rs6438549	All Except Skin and Sex Cancer	Diagnosed 50 To 64	0.682	0.97783
ss74832167	rs2551941	All Except Skin and Sex Cancer	Diagnosed 50 To 64	0.685	0.977844
ss74824583	rs7207146	All Except Skin and Sex Cancer	Diagnosed 50 To 64	0.687	0.978879
ss74845428	rs12696596	All Except Skin and Sex Cancer	Diagnosed 50 To 64	0.688	0.978892
ss74812215	rs5641	All Except Skin and Sex Cancer	Diagnosed 50 To 64	0.691	0.979553
ss74812407	rs2242665	All Except Skin and Sex Cancer	Diagnosed 50 To 64	0.693	0.979553
ss74825523	rs768039	All Except Skin and Sex Cancer	Diagnosed 50 To 64	0.691	0.979553
ss74840681	rs214260	All Except Skin and Sex Cancer	Diagnosed 50 To 64	0.693	0.979553
ss74841481	rs3799698	All Except Skin and Sex Cancer	Diagnosed 50 To 64	0.692	0.979553
ss74852875	rs1981331	All Except Skin and Sex Cancer	Diagnosed 50 To 64	0.693	0.979553
ss74825055	rs4821605	All Except Skin and Sex Cancer	Diagnosed 50 To 64	0.694	0.979765
ss74809253	rs229526	All Except Skin and Sex Cancer	Diagnosed 50 To 64	0.695	0.980376
ss74807018	rs3824433	All Except Skin and Sex Cancer	Diagnosed 50 To 64	0.696	0.980396
ss74837711	rs7035298	All Except Skin and Sex Cancer	Diagnosed 50 To 64	0.697	0.980396
ss74845090	rs715219	All Except Skin and Sex Cancer	Diagnosed 50 To 64	0.697	0.980396
ss74826239	rs3764621	All Except Skin and Sex Cancer	Diagnosed 50 To 64	0.699	0.981611
ss74852338	rs4942485	All Except Skin and Sex Cancer	Diagnosed 50 To 64	0.699	0.981611
ss74822169	rs8546	All Except Skin and Sex Cancer	Diagnosed 50 To 64	0.701	0.982423
ss74851443	rs9508019	All Except Skin and Sex Cancer	Diagnosed 50 To 64	0.701	0.982423
ss74848475	rs6877893	All Except Skin and Sex Cancer	Diagnosed 50 To 64	0.702	0.982629
ss74831198	rs11722918	All Except Skin and Sex Cancer	Diagnosed 50 To 64	0.703	0.982835
ss74824273	rs1967439	All Except Skin and Sex Cancer	Diagnosed 50 To 64	0.707	0.983256
ss74830949	rs3904629	All Except Skin and Sex Cancer	Diagnosed 50 To 64	0.707	0.983256
ss74835358	rs831016	All Except Skin and Sex Cancer	Diagnosed 50 To 64	0.705	0.983256
ss74808723	rs6330	All Except Skin and Sex Cancer	Diagnosed 50 To 64	0.714	0.984867
ss74824856	rs4723036	All Except Skin and Sex Cancer	Diagnosed 50 To 64	0.714	0.984867
ss74841413	rs1858015	All Except Skin and Sex Cancer	Diagnosed 50 To 64	0.714	0.984867
ss74854991	rs10408844	All Except Skin and Sex Cancer	Diagnosed 50 To 64	0.711	0.984867
ss74828130	rs1481120	All Except Skin and Sex Cancer	Diagnosed 50 To 64	0.716	0.985462
ss74849730	rs2914567	All Except Skin and Sex Cancer	Diagnosed 50 To 64	0.717	0.986053
ss74807828	rs362331	All Except Skin and Sex Cancer	Diagnosed 50 To 64	0.722	0.986063
ss74831236	rs6840502	All Except Skin and Sex Cancer	Diagnosed 50 To 64	0.72	0.986063
ss74843464	rs7567258	All Except Skin and Sex Cancer	Diagnosed 50 To 64	0.722	0.986063
ss74851051	rs12865518	All Except Skin and Sex Cancer	Diagnosed 50 To 64	0.718	0.986063
ss74854045	rs4792890	All Except Skin and Sex Cancer	Diagnosed 50 To 64	0.721	0.986063
ss74815391	rs743314	All Except Skin and Sex Cancer	Diagnosed 50 To 64	0.723	0.986065
ss74813434	rs666636	All Except Skin and Sex Cancer	Diagnosed 50 To 64	0.727	0.986266
ss74825826	rs17183763	All Except Skin and Sex Cancer	Diagnosed 50 To 64	0.727	0.986266
ss74808628	rs3924999	All Except Skin and Sex Cancer	Diagnosed 50 To 64	0.728	0.986848
ss74840122	rs738470	All Except Skin and Sex Cancer	Diagnosed 50 To 64	0.728	0.986848
ss74818012	rs1386016	All Except Skin and Sex Cancer	Diagnosed 50 To 64	0.734	0.986854
ss74819479	rs363075	All Except Skin and Sex Cancer	Diagnosed 50 To 64	0.736	0.986854
ss74826010	rs6574115	All Except Skin and Sex Cancer	Diagnosed 50 To 64	0.732	0.986854
ss74829919	rs2461823	All Except Skin and Sex Cancer	Diagnosed 50 To 64	0.735	0.986854
ss74833923	rs11796	All Except Skin and Sex Cancer	Diagnosed 50 To 64	0.733	0.986854
ss74830316	rs1549142	All Except Skin and Sex Cancer	Diagnosed 50 To 64	0.741	0.987809
ss74832125	rs11642606	All Except Skin and Sex Cancer	Diagnosed 50 To 64	0.74	0.987809
ss74814513	rs4988496	All Except Skin and Sex Cancer	Diagnosed 50 To 64	0.743	0.988379
ss74806433	rs2061690	All Except Skin and Sex Cancer	Diagnosed 50 To 64	0.775	0.988784
ss74806557	rs2228171	All Except Skin and Sex Cancer	Diagnosed 50 To 64	0.789	0.988784
ss74806706	rs1110627	All Except Skin and Sex Cancer	Diagnosed 50 To 64	0.76	0.988784
ss74807168	rs2073145	All Except Skin and Sex Cancer	Diagnosed 50 To 64	0.771	0.988784
ss74807232	rs2727288	All Except Skin and Sex Cancer	Diagnosed 50 To 64	0.808	0.988784
ss74809031	rs1801376	All Except Skin and Sex Cancer	Diagnosed 50 To 64	0.785	0.988784
ss74809142	rs2140516	All Except Skin and Sex Cancer	Diagnosed 50 To 64	0.808	0.988784
ss74809162	rs3765148	All Except Skin and Sex Cancer	Diagnosed 50 To 64	0.749	0.988784
ss74809229	rs9527025	All Except Skin and Sex Cancer	Diagnosed 50 To 64	0.802	0.988784
ss74809567	rs560191	All Except Skin and Sex Cancer	Diagnosed 50 To 64	0.749	0.988784
ss74811307	rs3747965	All Except Skin and Sex Cancer	Diagnosed 50 To 64	0.773	0.988784
ss74811691	rs1805094	All Except Skin and Sex Cancer	Diagnosed 50 To 64	0.802	0.988784
ss74811775	rs2070661	All Except Skin and Sex Cancer	Diagnosed 50 To 64	0.755	0.988784
ss74812168	rs2043289	All Except Skin and Sex Cancer	Diagnosed 50 To 64	0.834	0.988784
ss74815874	rs7150924	All Except Skin and Sex Cancer	Diagnosed 50 To 64	0.833	0.988784
ss74817386	rs7302230	All Except Skin and Sex Cancer	Diagnosed 50 To 64	0.785	0.988784
ss74819043	rs17592459	All Except Skin and Sex Cancer	Diagnosed 50 To 64	0.794	0.988784
ss74821192	rs2230461	All Except Skin and Sex Cancer	Diagnosed 50 To 64	0.776	0.988784
ss74822412	rs2238337	All Except Skin and Sex Cancer	Diagnosed 50 To 64	0.782	0.988784
ss74822855	rs12370377	All Except Skin and Sex Cancer	Diagnosed 50 To 64	0.777	0.988784
ss74825453	rs1805382	All Except Skin and Sex Cancer	Diagnosed 50 To 64	0.758	0.988784
ss74825823	rs2111959	All Except Skin and Sex Cancer	Diagnosed 50 To 64	0.832	0.988784
ss74826117	rs13313403	All Except Skin and Sex Cancer	Diagnosed 50 To 64	0.755	0.988784
ss74827341	rs9816377	All Except Skin and Sex Cancer	Diagnosed 50 To 64	0.786	0.988784
ss74827562	rs9371564	All Except Skin and Sex Cancer	Diagnosed 50 To 64	0.761	0.988784
ss74827661	rs7276092	All Except Skin and Sex Cancer	Diagnosed 50 To 64	0.762	0.988784
ss74828661	rs7017734	All Except Skin and Sex Cancer	Diagnosed 50 To 64	0.811	0.988784
ss74829065	rs7342920	All Except Skin and Sex Cancer	Diagnosed 50 To 64	0.775	0.988784
ss74829094	rs17127145	All Except Skin and Sex Cancer	Diagnosed 50 To 64	0.76	0.988784
ss74829490	rs830557	All Except Skin and Sex Cancer	Diagnosed 50 To 64	0.806	0.988784
ss74829762	rs2378510	All Except Skin and Sex Cancer	Diagnosed 50 To 64	0.827	0.988784
ss74829852	rs2892547	All Except Skin and Sex Cancer	Diagnosed 50 To 64	0.785	0.988784
ss74830175	rs13218209	All Except Skin and Sex Cancer	Diagnosed 50 To 64	0.786	0.988784
ss74831473	rs2857597	All Except Skin and Sex Cancer	Diagnosed 50 To 64	0.833	0.988784
ss74833087	rs9514039	All Except Skin and Sex Cancer	Diagnosed 50 To 64	0.794	0.988784
ss74833449	rs6458895	All Except Skin and Sex Cancer	Diagnosed 50 To 64	0.808	0.988784
ss74833604	rs577492	All Except Skin and Sex Cancer	Diagnosed 50 To 64	0.799	0.988784
ss74833712	rs2031749	All Except Skin and Sex Cancer	Diagnosed 50 To 64	0.814	0.988784
ss74834269	rs2472739	All Except Skin and Sex Cancer	Diagnosed 50 To 64	0.793	0.988784
ss74834657	rs9649886	All Except Skin and Sex Cancer	Diagnosed 50 To 64	0.763	0.988784
ss74835345	rs915179	All Except Skin and Sex Cancer	Diagnosed 50 To 64	0.774	0.988784
ss74836196	rs4773094	All Except Skin and Sex Cancer	Diagnosed 50 To 64	0.758	0.988784
ss74836503	rs9463851	All Except Skin and Sex Cancer	Diagnosed 50 To 64	0.759	0.988784
ss74837665	rs2304579	All Except Skin and Sex Cancer	Diagnosed 50 To 64	0.754	0.988784
ss74839118	rs17791147	All Except Skin and Sex Cancer	Diagnosed 50 To 64	0.809	0.988784
ss74839489	rs13233298	All Except Skin and Sex Cancer	Diagnosed 50 To 64	0.791	0.988784
ss74841784	rs759117	All Except Skin and Sex Cancer	Diagnosed 50 To 64	0.779	0.988784
ss74842339	rs1571779	All Except Skin and Sex Cancer	Diagnosed 50 To 64	0.819	0.988784
ss74842441	rs11668751	All Except Skin and Sex Cancer	Diagnosed 50 To 64	0.777	0.988784
ss74843760	rs7175387	All Except Skin and Sex Cancer	Diagnosed 50 To 64	0.766	0.988784
ss74845232	rs9937539	All Except Skin and Sex Cancer	Diagnosed 50 To 64	0.811	0.988784
ss74845389	rs17636471	All Except Skin and Sex Cancer	Diagnosed 50 To 64	0.802	0.988784
ss74845563	rs10817866	All Except Skin and Sex Cancer	Diagnosed 50 To 64	0.785	0.988784
ss74846507	rs6714520	All Except Skin and Sex Cancer	Diagnosed 50 To 64	0.797	0.988784
ss74848127	rs2062054	All Except Skin and Sex Cancer	Diagnosed 50 To 64	0.83	0.988784
ss74848176	rs16959906	All Except Skin and Sex Cancer	Diagnosed 50 To 64	0.755	0.988784
ss74848209	rs7825208	All Except Skin and Sex Cancer	Diagnosed 50 To 64	0.75	0.988784
ss74848630	rs10804876	All Except Skin and Sex Cancer	Diagnosed 50 To 64	0.805	0.988784
ss74850855	rs4647081	All Except Skin and Sex Cancer	Diagnosed 50 To 64	0.812	0.988784
ss74851962	rs1322454	All Except Skin and Sex Cancer	Diagnosed 50 To 64	0.75	0.988784
ss74852852	rs9526983	All Except Skin and Sex Cancer	Diagnosed 50 To 64	0.768	0.988784
ss74852899	rs1240402	All Except Skin and Sex Cancer	Diagnosed 50 To 64	0.775	0.988784
ss74853780	rs710035	All Except Skin and Sex Cancer	Diagnosed 50 To 64	0.803	0.988784
ss74854328	rs719452	All Except Skin and Sex Cancer	Diagnosed 50 To 64	0.825	0.988784
ss74854600	rs4687097	All Except Skin and Sex Cancer	Diagnosed 50 To 64	0.813	0.988784
ss74854923	rs17175194	All Except Skin and Sex Cancer	Diagnosed 50 To 64	0.828	0.988784
ss74852914	rs2100375	All Except Skin and Sex Cancer	Diagnosed 50 To 64	0.838	0.990807
ss74806360	rs644827	All Except Skin and Sex Cancer	Diagnosed 50 To 64	0.846	0.991111
ss74811270	rs3742318	All Except Skin and Sex Cancer	Diagnosed 50 To 64	0.846	0.991111
ss74812688	rs2258689	All Except Skin and Sex Cancer	Diagnosed 50 To 64	0.844	0.991111
ss74823865	rs833068	All Except Skin and Sex Cancer	Diagnosed 50 To 64	0.846	0.991111
ss74841724	rs4733220	All Except Skin and Sex Cancer	Diagnosed 50 To 64	0.846	0.991111
ss74843617	rs10256914	All Except Skin and Sex Cancer	Diagnosed 50 To 64	0.843	0.991111
ss74851417	rs7463426	All Except Skin and Sex Cancer	Diagnosed 50 To 64	0.843	0.991111
ss74807881	rs2058194	All Except Skin and Sex Cancer	Diagnosed 50 To 64	0.85	0.991181
ss74808937	rs3732209	All Except Skin and Sex Cancer	Diagnosed 50 To 64	0.858	0.991181
ss74809965	rs1800057	All Except Skin and Sex Cancer	Diagnosed 50 To 64	0.856	0.991181
ss74818935	rs1799977	All Except Skin and Sex Cancer	Diagnosed 50 To 64	0.853	0.991181
ss74823350	rs9904322	All Except Skin and Sex Cancer	Diagnosed 50 To 64	0.864	0.991181
ss74823810	rs4542691	All Except Skin and Sex Cancer	Diagnosed 50 To 64	0.847	0.991181
ss74825652	rs4870062	All Except Skin and Sex Cancer	Diagnosed 50 To 64	0.868	0.991181
ss74826037	rs3786680	All Except Skin and Sex Cancer	Diagnosed 50 To 64	0.848	0.991181
ss74829376	rs10110519	All Except Skin and Sex Cancer	Diagnosed 50 To 64	0.848	0.991181
ss74830935	rs1234225	All Except Skin and Sex Cancer	Diagnosed 50 To 64	0.862	0.991181
ss74834144	rs11107063	All Except Skin and Sex Cancer	Diagnosed 50 To 64	0.851	0.991181
ss74834978	rs17253937	All Except Skin and Sex Cancer	Diagnosed 50 To 64	0.857	0.991181
ss74839488	rs4839542	All Except Skin and Sex Cancer	Diagnosed 50 To 64	0.852	0.991181
ss74841035	rs17637318	All Except Skin and Sex Cancer	Diagnosed 50 To 64	0.861	0.991181
ss74841345	rs1884052	All Except Skin and Sex Cancer	Diagnosed 50 To 64	0.868	0.991181
ss74842462	rs6709162	All Except Skin and Sex Cancer	Diagnosed 50 To 64	0.866	0.991181
ss74842725	rs9466075	All Except Skin and Sex Cancer	Diagnosed 50 To 64	0.851	0.991181
ss74843804	rs2975668	All Except Skin and Sex Cancer	Diagnosed 50 To 64	0.86	0.991181
ss74844918	rs17692629	All Except Skin and Sex Cancer	Diagnosed 50 To 64	0.858	0.991181
ss74846917	rs2583762	All Except Skin and Sex Cancer	Diagnosed 50 To 64	0.855	0.991181
ss74808314	rs2280544	All Except Skin and Sex Cancer	Diagnosed 50 To 64	0.887	0.99123
ss74808881	rs3735781	All Except Skin and Sex Cancer	Diagnosed 50 To 64	0.889	0.99123
ss74810433	rs28583298	All Except Skin and Sex Cancer	Diagnosed 50 To 64	0.877	0.99123
ss74810725	rs10889205	All Except Skin and Sex Cancer	Diagnosed 50 To 64	0.875	0.99123
ss74815394	rs2286674	All Except Skin and Sex Cancer	Diagnosed 50 To 64	0.878	0.99123
ss74817929	rs9610645	All Except Skin and Sex Cancer	Diagnosed 50 To 64	0.893	0.99123
ss74822207	rs3169906	All Except Skin and Sex Cancer	Diagnosed 50 To 64	0.882	0.99123
ss74822606	rs11102924	All Except Skin and Sex Cancer	Diagnosed 50 To 64	0.871	0.99123
ss74824723	rs13132085	All Except Skin and Sex Cancer	Diagnosed 50 To 64	0.878	0.99123
ss74825161	rs4550905	All Except Skin and Sex Cancer	Diagnosed 50 To 64	0.879	0.99123
ss74825192	rs2741	All Except Skin and Sex Cancer	Diagnosed 50 To 64	0.888	0.99123
ss74825807	rs7217735	All Except Skin and Sex Cancer	Diagnosed 50 To 64	0.894	0.99123
ss74827106	rs8080613	All Except Skin and Sex Cancer	Diagnosed 50 To 64	0.892	0.99123
ss74834737	rs17074679	All Except Skin and Sex Cancer	Diagnosed 50 To 64	0.891	0.99123
ss74837472	rs9480866	All Except Skin and Sex Cancer	Diagnosed 50 To 64	0.871	0.99123
ss74838062	rs928815	All Except Skin and Sex Cancer	Diagnosed 50 To 64	0.88	0.99123
ss74838123	rs4855094	All Except Skin and Sex Cancer	Diagnosed 50 To 64	0.878	0.99123
ss74838956	rs2902993	All Except Skin and Sex Cancer	Diagnosed 50 To 64	0.87	0.99123
ss74844558	rs1007212	All Except Skin and Sex Cancer	Diagnosed 50 To 64	0.887	0.99123
ss74849325	rs10932196	All Except Skin and Sex Cancer	Diagnosed 50 To 64	0.892	0.99123
ss74849696	rs16827106	All Except Skin and Sex Cancer	Diagnosed 50 To 64	0.877	0.99123
ss74850026	rs7787274	All Except Skin and Sex Cancer	Diagnosed 50 To 64	0.886	0.99123
ss74831156	rs11022765	All Except Skin and Sex Cancer	Diagnosed 50 To 64	0.897	0.991852
ss74838337	rs13335668	All Except Skin and Sex Cancer	Diagnosed 50 To 64	0.901	0.992306
ss74814334	rs2242609	All Except Skin and Sex Cancer	Diagnosed 50 To 64	0.903	0.992425
ss74818384	rs17592438	All Except Skin and Sex Cancer	Diagnosed 50 To 64	0.904	0.992425
ss74821626	rs923047	All Except Skin and Sex Cancer	Diagnosed 50 To 64	0.908	0.992425
ss74826421	rs3729573	All Except Skin and Sex Cancer	Diagnosed 50 To 64	0.908	0.992425
ss74828237	rs8181047	All Except Skin and Sex Cancer	Diagnosed 50 To 64	0.909	0.992576
ss74847483	rs10807170	All Except Skin and Sex Cancer	Diagnosed 50 To 64	0.909	0.992576
ss74810907	rs689647	All Except Skin and Sex Cancer	Diagnosed 50 To 64	0.911	0.993191
ss74831877	rs1024748	All Except Skin and Sex Cancer	Diagnosed 50 To 64	0.911	0.993191
ss74852187	rs1044582	All Except Skin and Sex Cancer	Diagnosed 50 To 64	0.911	0.993191
ss74809653	rs1799950	All Except Skin and Sex Cancer	Diagnosed 50 To 64	0.928	0.995046
ss74810931	rs4811888	All Except Skin and Sex Cancer	Diagnosed 50 To 64	0.921	0.995046
ss74811692	rs854524	All Except Skin and Sex Cancer	Diagnosed 50 To 64	0.927	0.995046
ss74813304	rs4534403	All Except Skin and Sex Cancer	Diagnosed 50 To 64	0.928	0.995046
ss74819497	rs6554162	All Except Skin and Sex Cancer	Diagnosed 50 To 64	0.931	0.995046
ss74826258	rs1843637	All Except Skin and Sex Cancer	Diagnosed 50 To 64	0.922	0.995046
ss74826340	rs8113281	All Except Skin and Sex Cancer	Diagnosed 50 To 64	0.923	0.995046
ss74826949	rs2640492	All Except Skin and Sex Cancer	Diagnosed 50 To 64	0.924	0.995046
ss74828961	rs2389557	All Except Skin and Sex Cancer	Diagnosed 50 To 64	0.926	0.995046
ss74837589	rs3742825	All Except Skin and Sex Cancer	Diagnosed 50 To 64	0.919	0.995046
ss74851100	rs1257179	All Except Skin and Sex Cancer	Diagnosed 50 To 64	0.931	0.995046
ss74854582	rs4966022	All Except Skin and Sex Cancer	Diagnosed 50 To 64	0.922	0.995046
ss74807779	rs11575194	All Except Skin and Sex Cancer	Diagnosed 50 To 64	0.935	0.995092
ss74809099	rs4253211	All Except Skin and Sex Cancer	Diagnosed 50 To 64	0.94	0.995092
ss74811429	rs6793295	All Except Skin and Sex Cancer	Diagnosed 50 To 64	0.943	0.995092
ss74811430	rs10936600	All Except Skin and Sex Cancer	Diagnosed 50 To 64	0.946	0.995092
ss74838941	rs932480	All Except Skin and Sex Cancer	Diagnosed 50 To 64	0.936	0.995092
ss74841944	rs13320980	All Except Skin and Sex Cancer	Diagnosed 50 To 64	0.945	0.995092
ss74843980	rs17151244	All Except Skin and Sex Cancer	Diagnosed 50 To 64	0.938	0.995092
ss74819188	rs12419308	All Except Skin and Sex Cancer	Diagnosed 50 To 64	0.951	0.995353
ss74831570	rs17286989	All Except Skin and Sex Cancer	Diagnosed 50 To 64	0.949	0.995353
ss74806169	rs12408890	All Except Skin and Sex Cancer	Diagnosed 50 To 64	0.957	0.995436
ss74806787	rs7487683	All Except Skin and Sex Cancer	Diagnosed 50 To 64	0.958	0.995436
ss74819408	rs2227955	All Except Skin and Sex Cancer	Diagnosed 50 To 64	0.958	0.995436
ss74821696	rs4150360	All Except Skin and Sex Cancer	Diagnosed 50 To 64	0.957	0.995436
ss74824971	rs10849051	All Except Skin and Sex Cancer	Diagnosed 50 To 64	0.957	0.995436
ss74825716	rs2070776	All Except Skin and Sex Cancer	Diagnosed 50 To 64	0.953	0.995436
ss74831248	rs781062	All Except Skin and Sex Cancer	Diagnosed 50 To 64	0.958	0.995436
ss74831307	rs7833348	All Except Skin and Sex Cancer	Diagnosed 50 To 64	0.959	0.995436
ss74840168	rs2671686	All Except Skin and Sex Cancer	Diagnosed 50 To 64	0.952	0.995436
ss74844096	rs2806635	All Except Skin and Sex Cancer	Diagnosed 50 To 64	0.957	0.995436
ss74817431	rs6927536	All Except Skin and Sex Cancer	Diagnosed 50 To 64	0.962	0.995551
ss74821439	rs1800391	All Except Skin and Sex Cancer	Diagnosed 50 To 64	0.96	0.995551
ss74835398	rs2727270	All Except Skin and Sex Cancer	Diagnosed 50 To 64	0.964	0.995989
ss74854311	rs2299939	All Except Skin and Sex Cancer	Diagnosed 50 To 64	0.965	0.996278
ss74838796	rs7981120	All Except Skin and Sex Cancer	Diagnosed 50 To 64	0.966	0.996864
ss74826573	rs1008076	All Except Skin and Sex Cancer	Diagnosed 50 To 64	0.969	0.997428
ss74811932	rs7220988	All Except Skin and Sex Cancer	Diagnosed 50 To 64	0.97	0.997566
ss74823782	rs6504192	All Except Skin and Sex Cancer	Diagnosed 50 To 64	0.97	0.997566
ss74830375	rs1331138	All Except Skin and Sex Cancer	Diagnosed 50 To 64	0.97	0.997566
ss74835019	rs12208304	All Except Skin and Sex Cancer	Diagnosed 50 To 64	0.973	0.997819
ss74845924	rs9397085	All Except Skin and Sex Cancer	Diagnosed 50 To 64	0.974	0.997819
ss74848314	rs12489218	All Except Skin and Sex Cancer	Diagnosed 50 To 64	0.975	0.998093
ss74852822	rs10413734	All Except Skin and Sex Cancer	Diagnosed 50 To 64	0.975	0.998093
ss74813062	rs6701295	All Except Skin and Sex Cancer	Diagnosed 50 To 64	0.978	0.998219
ss74827004	rs863818	All Except Skin and Sex Cancer	Diagnosed 50 To 64	0.978	0.998219
ss74834378	rs949155	All Except Skin and Sex Cancer	Diagnosed 50 To 64	0.978	0.998219
ss74807088	rs675	All Except Skin and Sex Cancer	Diagnosed 50 To 64	0.987	0.998221
ss74812649	rs515192	All Except Skin and Sex Cancer	Diagnosed 50 To 64	0.991	0.998221
ss74814526	rs11074362	All Except Skin and Sex Cancer	Diagnosed 50 To 64	0.981	0.998221
ss74817863	rs11552145	All Except Skin and Sex Cancer	Diagnosed 50 To 64	0.991	0.998221
ss74819252	rs9913923	All Except Skin and Sex Cancer	Diagnosed 50 To 64	0.981	0.998221
ss74823034	rs174589	All Except Skin and Sex Cancer	Diagnosed 50 To 64	0.989	0.998221
ss74823867	rs2170082	All Except Skin and Sex Cancer	Diagnosed 50 To 64	0.985	0.998221
ss74830423	rs2501879	All Except Skin and Sex Cancer	Diagnosed 50 To 64	0.982	0.998221
ss74830760	rs5762734	All Except Skin and Sex Cancer	Diagnosed 50 To 64	0.991	0.998221
ss74831986	rs933208	All Except Skin and Sex Cancer	Diagnosed 50 To 64	0.987	0.998221
ss74833652	rs1016547	All Except Skin and Sex Cancer	Diagnosed 50 To 64	0.985	0.998221
ss74838357	rs3760627	All Except Skin and Sex Cancer	Diagnosed 50 To 64	0.987	0.998221
ss74838606	rs16959569	All Except Skin and Sex Cancer	Diagnosed 50 To 64	0.989	0.998221
ss74843192	rs10117822	All Except Skin and Sex Cancer	Diagnosed 50 To 64	0.989	0.998221
ss74843920	rs828923	All Except Skin and Sex Cancer	Diagnosed 50 To 64	0.979	0.998221
ss74851751	rs7152131	All Except Skin and Sex Cancer	Diagnosed 50 To 64	0.988	0.998221
ss74815650	rs16965150	All Except Skin and Sex Cancer	Diagnosed 50 To 64	0.993	0.998635
ss74831055	rs959173	All Except Skin and Sex Cancer	Diagnosed 50 To 64	0.994	0.998902
ss74832411	rs11155813	All Except Skin and Sex Cancer	Diagnosed 50 To 64	0.994	0.998902
ss74840565	rs6983315	All Except Skin and Sex Cancer	Diagnosed 50 To 64	0.995	0.998902
ss74807672	rs2071699	All Except Skin and Sex Cancer	Diagnosed 50 To 64	0.996	0.999035
ss74828907	rs7968701	All Except Skin and Sex Cancer	Diagnosed 50 To 64	0.996	0.999035
ss74807444	rs4073918	All Except Skin and Sex Cancer	Diagnosed 50 To 64	0.997	0.999458
ss74823021	rs2028827	All Except Skin and Sex Cancer	Diagnosed 50 To 64	0.999	0.999723
ss74828537	rs6778964	All Except Skin and Sex Cancer	Diagnosed 50 To 64	0.998	0.999723
ss74830432	rs9919599	All Except Skin and Sex Cancer	Diagnosed 50 To 64	0.999	0.999723
ss74808517	rs2584625	All Except Skin and Sex Cancer	Diagnosed 50 To 64	1	1
ss74842325	rs11246007	All Except Skin and Sex Cancer	Diagnosed 65 To 79	0.000669	0.215215
ss74822356	rs317913	All Except Skin and Sex Cancer	Diagnosed 65 To 79	0.00163	0.331369
ss74821439	rs1800391	All Except Skin and Sex Cancer	Diagnosed 65 To 79	0.00239	0.370483
ss74807018	rs3824433	All Except Skin and Sex Cancer	Diagnosed 65 To 79	0.00295	0.396844
ss74808476	rs1801058	All Except Skin and Sex Cancer	Diagnosed 65 To 79	0.00429	0.417641
ss74808314	rs2280544	All Except Skin and Sex Cancer	Diagnosed 65 To 79	0.00468	0.41822
ss74824741	rs765840	All Except Skin and Sex Cancer	Diagnosed 65 To 79	0.00578	0.462336
ss74832742	rs12414948	All Except Skin and Sex Cancer	Diagnosed 65 To 79	0.00687	0.487331
ss74807828	rs362331	All Except Skin and Sex Cancer	Diagnosed 65 To 79	0.00824	0.49526
ss74835167	rs2057070	All Except Skin and Sex Cancer	Diagnosed 65 To 79	0.0081	0.49526
ss74823143	rs8108097	All Except Skin and Sex Cancer	Diagnosed 65 To 79	0.00922	0.510935
ss74841181	rs4429607	All Except Skin and Sex Cancer	Diagnosed 65 To 79	0.00949	0.51246
ss74843374	rs3761353	All Except Skin and Sex Cancer	Diagnosed 65 To 79	0.00975	0.5184
ss74822619	rs7510675	All Except Skin and Sex Cancer	Diagnosed 65 To 79	0.0111	0.529126
ss74845289	rs10002793	All Except Skin and Sex Cancer	Diagnosed 65 To 79	0.0111	0.529126
ss74836654	rs17447091	All Except Skin and Sex Cancer	Diagnosed 65 To 79	0.0113	0.53497
ss74824583	rs7207146	All Except Skin and Sex Cancer	Diagnosed 65 To 79	0.0142	0.587727
ss74824285	rs5995990	All Except Skin and Sex Cancer	Diagnosed 65 To 79	0.0144	0.588951
ss74841134	rs9626730	All Except Skin and Sex Cancer	Diagnosed 65 To 79	0.0166	0.613579
ss74837250	rs4986589	All Except Skin and Sex Cancer	Diagnosed 65 To 79	0.0173	0.6228
ss74822715	rs380713	All Except Skin and Sex Cancer	Diagnosed 65 To 79	0.0181	0.644882
ss74828676	rs11787370	All Except Skin and Sex Cancer	Diagnosed 65 To 79	0.0183	0.648665
ss74808575	rs12656368	All Except Skin and Sex Cancer	Diagnosed 65 To 79	0.0188	0.659622
ss74809066	rs762679	All Except Skin and Sex Cancer	Diagnosed 65 To 79	0.0235	0.70931
ss74834090	rs10093273	All Except Skin and Sex Cancer	Diagnosed 65 To 79	0.0245	0.726646
ss74841407	rs3025780	All Except Skin and Sex Cancer	Diagnosed 65 To 79	0.0246	0.726646
ss74806321	rs2070507	All Except Skin and Sex Cancer	Diagnosed 65 To 79	0.0256	0.73474
ss74829094	rs17127145	All Except Skin and Sex Cancer	Diagnosed 65 To 79	0.0265	0.73474
ss74853601	rs7166852	All Except Skin and Sex Cancer	Diagnosed 65 To 79	0.0272	0.7371
ss74819043	rs17592459	All Except Skin and Sex Cancer	Diagnosed 65 To 79	0.0298	0.743601
ss74845434	rs1957757	All Except Skin and Sex Cancer	Diagnosed 65 To 79	0.0297	0.743601
ss74851100	rs1257179	All Except Skin and Sex Cancer	Diagnosed 65 To 79	0.0307	0.763304
ss74832646	rs10409667	All Except Skin and Sex Cancer	Diagnosed 65 To 79	0.0311	0.770477
ss74829490	rs830557	All Except Skin and Sex Cancer	Diagnosed 65 To 79	0.0317	0.774242
ss74807208	rs1126497	All Except Skin and Sex Cancer	Diagnosed 65 To 79	0.0336	0.779874
ss74835763	rs7716228	All Except Skin and Sex Cancer	Diagnosed 65 To 79	0.0333	0.779874
ss74848338	rs13211987	All Except Skin and Sex Cancer	Diagnosed 65 To 79	0.0342	0.779874
ss74812023	rs766425	All Except Skin and Sex Cancer	Diagnosed 65 To 79	0.0358	0.785554
ss74808470	rs8192678	All Except Skin and Sex Cancer	Diagnosed 65 To 79	0.0375	0.792351
ss74815394	rs2286674	All Except Skin and Sex Cancer	Diagnosed 65 To 79	0.0382	0.795296
ss74809625	rs7830743	All Except Skin and Sex Cancer	Diagnosed 65 To 79	0.0395	0.797266
ss74811272	rs766173	All Except Skin and Sex Cancer	Diagnosed 65 To 79	0.0406	0.797266
ss74822207	rs3169906	All Except Skin and Sex Cancer	Diagnosed 65 To 79	0.0448	0.797266
ss74838613	rs10489431	All Except Skin and Sex Cancer	Diagnosed 65 To 79	0.0451	0.797266
ss74838796	rs7981120	All Except Skin and Sex Cancer	Diagnosed 65 To 79	0.0445	0.797266
ss74845213	rs8067797	All Except Skin and Sex Cancer	Diagnosed 65 To 79	0.0435	0.797266
ss74847879	rs1558358	All Except Skin and Sex Cancer	Diagnosed 65 To 79	0.0406	0.797266
ss74831750	rs8138102	All Except Skin and Sex Cancer	Diagnosed 65 To 79	0.0458	0.801442
ss74826573	rs1008076	All Except Skin and Sex Cancer	Diagnosed 65 To 79	0.0467	0.804428
ss74848308	rs11145164	All Except Skin and Sex Cancer	Diagnosed 65 To 79	0.0475	0.804428
ss74848527	rs2246022	All Except Skin and Sex Cancer	Diagnosed 65 To 79	0.0492	0.805583
ss74811932	rs7220988	All Except Skin and Sex Cancer	Diagnosed 65 To 79	0.0518	0.813453
ss74823520	rs11546710	All Except Skin and Sex Cancer	Diagnosed 65 To 79	0.0519	0.813453
ss74806138	rs11953798	All Except Skin and Sex Cancer	Diagnosed 65 To 79	0.0528	0.81371
ss74829216	rs727877	All Except Skin and Sex Cancer	Diagnosed 65 To 79	0.0538	0.81371
ss74847950	rs3750036	All Except Skin and Sex Cancer	Diagnosed 65 To 79	0.0529	0.81371
ss74806711	rs248248	All Except Skin and Sex Cancer	Diagnosed 65 To 79	0.0563	0.815558
ss74813863	rs1047769	All Except Skin and Sex Cancer	Diagnosed 65 To 79	0.0567	0.815843
ss74817318	rs854560	All Except Skin and Sex Cancer	Diagnosed 65 To 79	0.0569	0.815843
ss74814987	rs11531	All Except Skin and Sex Cancer	Diagnosed 65 To 79	0.0645	0.827403
ss74815696	rs6913643	All Except Skin and Sex Cancer	Diagnosed 65 To 79	0.0595	0.827403
ss74820980	rs662	All Except Skin and Sex Cancer	Diagnosed 65 To 79	0.0635	0.827403
ss74822169	rs8546	All Except Skin and Sex Cancer	Diagnosed 65 To 79	0.0592	0.827403
ss74828963	rs6000634	All Except Skin and Sex Cancer	Diagnosed 65 To 79	0.0622	0.827403
ss74833610	rs2142097	All Except Skin and Sex Cancer	Diagnosed 65 To 79	0.0612	0.827403
ss74850916	rs9649847	All Except Skin and Sex Cancer	Diagnosed 65 To 79	0.0605	0.827403
ss74815391	rs743314	All Except Skin and Sex Cancer	Diagnosed 65 To 79	0.0695	0.83326
ss74828727	rs2297231	All Except Skin and Sex Cancer	Diagnosed 65 To 79	0.0665	0.83326
ss74843192	rs10117822	All Except Skin and Sex Cancer	Diagnosed 65 To 79	0.067	0.83326
ss74850078	rs1399499	All Except Skin and Sex Cancer	Diagnosed 65 To 79	0.0679	0.83326
ss74829624	rs7025886	All Except Skin and Sex Cancer	Diagnosed 65 To 79	0.0717	0.838239
ss74831579	rs2471551	All Except Skin and Sex Cancer	Diagnosed 65 To 79	0.0724	0.838239
ss74851662	rs7809330	All Except Skin and Sex Cancer	Diagnosed 65 To 79	0.0715	0.838239
ss74843804	rs2975668	All Except Skin and Sex Cancer	Diagnosed 65 To 79	0.0751	0.846413
ss74836316	rs13075375	All Except Skin and Sex Cancer	Diagnosed 65 To 79	0.0763	0.847635
ss74817110	rs3969860	All Except Skin and Sex Cancer	Diagnosed 65 To 79	0.0817	0.848896
ss74842754	rs2176085	All Except Skin and Sex Cancer	Diagnosed 65 To 79	0.0793	0.848896
ss74847061	rs13016051	All Except Skin and Sex Cancer	Diagnosed 65 To 79	0.0816	0.848896
ss74813613	rs11953029	All Except Skin and Sex Cancer	Diagnosed 65 To 79	0.0853	0.850784
ss74815370	rs11538263	All Except Skin and Sex Cancer	Diagnosed 65 To 79	0.0848	0.850784
ss74824355	rs11634874	All Except Skin and Sex Cancer	Diagnosed 65 To 79	0.0872	0.859619
ss74813434	rs666636	All Except Skin and Sex Cancer	Diagnosed 65 To 79	0.09	0.859739
ss74844704	rs456514	All Except Skin and Sex Cancer	Diagnosed 65 To 79	0.0906	0.859739
ss74815750	rs8109771	All Except Skin and Sex Cancer	Diagnosed 65 To 79	0.0916	0.860243
ss74806351	rs4698803	All Except Skin and Sex Cancer	Diagnosed 65 To 79	0.113	0.865774
ss74806791	rs956868	All Except Skin and Sex Cancer	Diagnosed 65 To 79	0.119	0.865774
ss74807967	rs1494555	All Except Skin and Sex Cancer	Diagnosed 65 To 79	0.0951	0.865774
ss74809285	rs1133657	All Except Skin and Sex Cancer	Diagnosed 65 To 79	0.115	0.865774
ss74811430	rs10936600	All Except Skin and Sex Cancer	Diagnosed 65 To 79	0.0941	0.865774
ss74812688	rs2258689	All Except Skin and Sex Cancer	Diagnosed 65 To 79	0.0964	0.865774
ss74824791	rs1190592	All Except Skin and Sex Cancer	Diagnosed 65 To 79	0.116	0.865774
ss74825162	rs4987825	All Except Skin and Sex Cancer	Diagnosed 65 To 79	0.0952	0.865774
ss74825192	rs2741	All Except Skin and Sex Cancer	Diagnosed 65 To 79	0.119	0.865774
ss74826392	rs10283145	All Except Skin and Sex Cancer	Diagnosed 65 To 79	0.117	0.865774
ss74826704	rs831122	All Except Skin and Sex Cancer	Diagnosed 65 To 79	0.0968	0.865774
ss74827004	rs863818	All Except Skin and Sex Cancer	Diagnosed 65 To 79	0.0984	0.865774
ss74827939	rs17758399	All Except Skin and Sex Cancer	Diagnosed 65 To 79	0.116	0.865774
ss74829065	rs7342920	All Except Skin and Sex Cancer	Diagnosed 65 To 79	0.0977	0.865774
ss74829524	rs4329748	All Except Skin and Sex Cancer	Diagnosed 65 To 79	0.0978	0.865774
ss74829919	rs2461823	All Except Skin and Sex Cancer	Diagnosed 65 To 79	0.12	0.865774
ss74833351	rs933649	All Except Skin and Sex Cancer	Diagnosed 65 To 79	0.109	0.865774
ss74834954	rs4235308	All Except Skin and Sex Cancer	Diagnosed 65 To 79	0.104	0.865774
ss74835310	rs11617752	All Except Skin and Sex Cancer	Diagnosed 65 To 79	0.114	0.865774
ss74836103	rs12206050	All Except Skin and Sex Cancer	Diagnosed 65 To 79	0.121	0.865774
ss74837593	rs165933	All Except Skin and Sex Cancer	Diagnosed 65 To 79	0.101	0.865774
ss74838580	rs12727	All Except Skin and Sex Cancer	Diagnosed 65 To 79	0.121	0.865774
ss74842198	rs2161120	All Except Skin and Sex Cancer	Diagnosed 65 To 79	0.12	0.865774
ss74845172	rs11132277	All Except Skin and Sex Cancer	Diagnosed 65 To 79	0.112	0.865774
ss74853609	rs7962818	All Except Skin and Sex Cancer	Diagnosed 65 To 79	0.0985	0.865774
ss74838956	rs2902993	All Except Skin and Sex Cancer	Diagnosed 65 To 79	0.124	0.870042
ss74839206	rs2923774	All Except Skin and Sex Cancer	Diagnosed 65 To 79	0.126	0.870042
ss74845295	rs2975734	All Except Skin and Sex Cancer	Diagnosed 65 To 79	0.125	0.870042
ss74851444	rs495490	All Except Skin and Sex Cancer	Diagnosed 65 To 79	0.132	0.88581
ss74834126	rs17415614	All Except Skin and Sex Cancer	Diagnosed 65 To 79	0.134	0.890585
ss74848209	rs7825208	All Except Skin and Sex Cancer	Diagnosed 65 To 79	0.136	0.895269
ss74852447	rs11760261	All Except Skin and Sex Cancer	Diagnosed 65 To 79	0.136	0.895269
ss74823240	rs464884	All Except Skin and Sex Cancer	Diagnosed 65 To 79	0.137	0.897577
ss74807815	rs1804160	All Except Skin and Sex Cancer	Diagnosed 65 To 79	0.139	0.899596
ss74852497	rs2760482	All Except Skin and Sex Cancer	Diagnosed 65 To 79	0.138	0.899596
ss74812284	rs2287657	All Except Skin and Sex Cancer	Diagnosed 65 To 79	0.141	0.904074
ss74823828	rs7288979	All Except Skin and Sex Cancer	Diagnosed 65 To 79	0.142	0.904315
ss74839896	rs13276892	All Except Skin and Sex Cancer	Diagnosed 65 To 79	0.142	0.904315
ss74811930	rs12174349	All Except Skin and Sex Cancer	Diagnosed 65 To 79	0.145	0.907826
ss74809965	rs1800057	All Except Skin and Sex Cancer	Diagnosed 65 To 79	0.152	0.910419
ss74814958	rs12050102	All Except Skin and Sex Cancer	Diagnosed 65 To 79	0.152	0.910419
ss74830432	rs9919599	All Except Skin and Sex Cancer	Diagnosed 65 To 79	0.152	0.910419
ss74837679	rs458358	All Except Skin and Sex Cancer	Diagnosed 65 To 79	0.15	0.910419
ss74841291	rs380417	All Except Skin and Sex Cancer	Diagnosed 65 To 79	0.149	0.910419
ss74843583	rs519825	All Except Skin and Sex Cancer	Diagnosed 65 To 79	0.152	0.910419
ss74849761	rs3112518	All Except Skin and Sex Cancer	Diagnosed 65 To 79	0.152	0.910419
ss74854991	rs10408844	All Except Skin and Sex Cancer	Diagnosed 65 To 79	0.149	0.910419
ss74809253	rs229526	All Except Skin and Sex Cancer	Diagnosed 65 To 79	0.159	0.912906
ss74814513	rs4988496	All Except Skin and Sex Cancer	Diagnosed 65 To 79	0.16	0.912906
ss74823058	rs1049562	All Except Skin and Sex Cancer	Diagnosed 65 To 79	0.16	0.912906
ss74828999	rs4841304	All Except Skin and Sex Cancer	Diagnosed 65 To 79	0.157	0.912906
ss74830946	rs7650103	All Except Skin and Sex Cancer	Diagnosed 65 To 79	0.158	0.912906
ss74834657	rs9649886	All Except Skin and Sex Cancer	Diagnosed 65 To 79	0.158	0.912906
ss74839510	rs5996631	All Except Skin and Sex Cancer	Diagnosed 65 To 79	0.158	0.912906
ss74842404	rs11249994	All Except Skin and Sex Cancer	Diagnosed 65 To 79	0.154	0.912906
ss74850691	rs806370	All Except Skin and Sex Cancer	Diagnosed 65 To 79	0.155	0.912906
ss74851590	rs11841502	All Except Skin and Sex Cancer	Diagnosed 65 To 79	0.159	0.912906
ss74852891	rs503532	All Except Skin and Sex Cancer	Diagnosed 65 To 79	0.157	0.912906
ss74810115	rs4816	All Except Skin and Sex Cancer	Diagnosed 65 To 79	0.168	0.913897
ss74810722	rs1494558	All Except Skin and Sex Cancer	Diagnosed 65 To 79	0.174	0.913897
ss74811892	rs16027	All Except Skin and Sex Cancer	Diagnosed 65 To 79	0.173	0.913897
ss74811894	rs7645550	All Except Skin and Sex Cancer	Diagnosed 65 To 79	0.171	0.913897
ss74812873	rs1977172	All Except Skin and Sex Cancer	Diagnosed 65 To 79	0.168	0.913897
ss74815976	rs17150554	All Except Skin and Sex Cancer	Diagnosed 65 To 79	0.172	0.913897
ss74823157	rs904647	All Except Skin and Sex Cancer	Diagnosed 65 To 79	0.174	0.913897
ss74823636	rs2877716	All Except Skin and Sex Cancer	Diagnosed 65 To 79	0.165	0.913897
ss74826263	rs806377	All Except Skin and Sex Cancer	Diagnosed 65 To 79	0.162	0.913897
ss74828825	rs2071575	All Except Skin and Sex Cancer	Diagnosed 65 To 79	0.172	0.913897
ss74835019	rs12208304	All Except Skin and Sex Cancer	Diagnosed 65 To 79	0.169	0.913897
ss74838062	rs928815	All Except Skin and Sex Cancer	Diagnosed 65 To 79	0.168	0.913897
ss74838320	rs635441	All Except Skin and Sex Cancer	Diagnosed 65 To 79	0.166	0.913897
ss74838757	rs10854124	All Except Skin and Sex Cancer	Diagnosed 65 To 79	0.168	0.913897
ss74847743	rs6567328	All Except Skin and Sex Cancer	Diagnosed 65 To 79	0.162	0.913897
ss74850483	rs2290036	All Except Skin and Sex Cancer	Diagnosed 65 To 79	0.167	0.913897
ss74854771	rs3800827	All Except Skin and Sex Cancer	Diagnosed 65 To 79	0.163	0.913897
ss74817331	rs8003245	All Except Skin and Sex Cancer	Diagnosed 65 To 79	0.177	0.914448
ss74826965	rs9809535	All Except Skin and Sex Cancer	Diagnosed 65 To 79	0.178	0.914448
ss74850564	rs2834280	All Except Skin and Sex Cancer	Diagnosed 65 To 79	0.179	0.914448
ss74823603	rs1978346	All Except Skin and Sex Cancer	Diagnosed 65 To 79	0.182	0.918907
ss74808228	rs2516489	All Except Skin and Sex Cancer	Diagnosed 65 To 79	0.184	0.918936
ss74816892	rs17507841	All Except Skin and Sex Cancer	Diagnosed 65 To 79	0.183	0.918936
ss74819497	rs6554162	All Except Skin and Sex Cancer	Diagnosed 65 To 79	0.184	0.918936
ss74825833	rs838147	All Except Skin and Sex Cancer	Diagnosed 65 To 79	0.186	0.9216
ss74831558	rs9397463	All Except Skin and Sex Cancer	Diagnosed 65 To 79	0.187	0.922587
ss74831833	rs1862263	All Except Skin and Sex Cancer	Diagnosed 65 To 79	0.187	0.922587
ss74852914	rs2100375	All Except Skin and Sex Cancer	Diagnosed 65 To 79	0.187	0.922587
ss74818184	rs11549465	All Except Skin and Sex Cancer	Diagnosed 65 To 79	0.188	0.925538
ss74810878	rs8178017	All Except Skin and Sex Cancer	Diagnosed 65 To 79	0.192	0.929996
ss74822550	rs13058338	All Except Skin and Sex Cancer	Diagnosed 65 To 79	0.192	0.929996
ss74824481	rs7469968	All Except Skin and Sex Cancer	Diagnosed 65 To 79	0.192	0.929996
ss74836579	rs6070187	All Except Skin and Sex Cancer	Diagnosed 65 To 79	0.192	0.929996
ss74831248	rs781062	All Except Skin and Sex Cancer	Diagnosed 65 To 79	0.194	0.932495
ss74833309	rs7997595	All Except Skin and Sex Cancer	Diagnosed 65 To 79	0.193	0.932495
ss74806117	rs6461378	All Except Skin and Sex Cancer	Diagnosed 65 To 79	0.205	0.933323
ss74809771	rs2773347	All Except Skin and Sex Cancer	Diagnosed 65 To 79	0.201	0.933323
ss74814070	rs2227935	All Except Skin and Sex Cancer	Diagnosed 65 To 79	0.204	0.933323
ss74815739	rs17763658	All Except Skin and Sex Cancer	Diagnosed 65 To 79	0.207	0.933323
ss74823508	rs9557916	All Except Skin and Sex Cancer	Diagnosed 65 To 79	0.196	0.933323
ss74826843	rs6259	All Except Skin and Sex Cancer	Diagnosed 65 To 79	0.197	0.933323
ss74827465	rs12680804	All Except Skin and Sex Cancer	Diagnosed 65 To 79	0.206	0.933323
ss74834383	rs2741339	All Except Skin and Sex Cancer	Diagnosed 65 To 79	0.206	0.933323
ss74836451	rs12546017	All Except Skin and Sex Cancer	Diagnosed 65 To 79	0.195	0.933323
ss74852822	rs10413734	All Except Skin and Sex Cancer	Diagnosed 65 To 79	0.206	0.933323
ss74846235	rs7677000	All Except Skin and Sex Cancer	Diagnosed 65 To 79	0.209	0.936233
ss74819048	rs1346044	All Except Skin and Sex Cancer	Diagnosed 65 To 79	0.215	0.937293
ss74819984	rs3810433	All Except Skin and Sex Cancer	Diagnosed 65 To 79	0.219	0.937293
ss74826314	rs10213251	All Except Skin and Sex Cancer	Diagnosed 65 To 79	0.212	0.937293
ss74828620	rs12610763	All Except Skin and Sex Cancer	Diagnosed 65 To 79	0.211	0.937293
ss74829652	rs11066322	All Except Skin and Sex Cancer	Diagnosed 65 To 79	0.214	0.937293
ss74829722	rs10821841	All Except Skin and Sex Cancer	Diagnosed 65 To 79	0.217	0.937293
ss74842368	rs13037493	All Except Skin and Sex Cancer	Diagnosed 65 To 79	0.217	0.937293
ss74846252	rs12538592	All Except Skin and Sex Cancer	Diagnosed 65 To 79	0.218	0.937293
ss74847382	rs352080	All Except Skin and Sex Cancer	Diagnosed 65 To 79	0.219	0.937293
ss74850629	rs2076399	All Except Skin and Sex Cancer	Diagnosed 65 To 79	0.215	0.937293
ss74853674	rs1181874	All Except Skin and Sex Cancer	Diagnosed 65 To 79	0.216	0.937293
ss74854582	rs4966022	All Except Skin and Sex Cancer	Diagnosed 65 To 79	0.216	0.937293
ss74811498	rs6519993	All Except Skin and Sex Cancer	Diagnosed 65 To 79	0.22	0.938088
ss74848920	rs11508026	All Except Skin and Sex Cancer	Diagnosed 65 To 79	0.22	0.938088
ss74807881	rs2058194	All Except Skin and Sex Cancer	Diagnosed 65 To 79	0.221	0.939454
ss74843516	rs7245579	All Except Skin and Sex Cancer	Diagnosed 65 To 79	0.221	0.939454
ss74806122	rs1372325	All Except Skin and Sex Cancer	Diagnosed 65 To 79	0.223	0.942738
ss74833227	rs3773747	All Except Skin and Sex Cancer	Diagnosed 65 To 79	0.223	0.942738
ss74841573	rs4636677	All Except Skin and Sex Cancer	Diagnosed 65 To 79	0.225	0.943304
ss74854600	rs4687097	All Except Skin and Sex Cancer	Diagnosed 65 To 79	0.224	0.943304
ss74806156	rs7955866	All Except Skin and Sex Cancer	Diagnosed 65 To 79	0.24	0.94577
ss74808099	rs7291444	All Except Skin and Sex Cancer	Diagnosed 65 To 79	0.24	0.94577
ss74812168	rs2043289	All Except Skin and Sex Cancer	Diagnosed 65 To 79	0.231	0.94577
ss74815315	rs12032272	All Except Skin and Sex Cancer	Diagnosed 65 To 79	0.238	0.94577
ss74818655	rs3917221	All Except Skin and Sex Cancer	Diagnosed 65 To 79	0.238	0.94577
ss74819479	rs363075	All Except Skin and Sex Cancer	Diagnosed 65 To 79	0.239	0.94577
ss74822380	rs11986969	All Except Skin and Sex Cancer	Diagnosed 65 To 79	0.231	0.94577
ss74823363	rs2268257	All Except Skin and Sex Cancer	Diagnosed 65 To 79	0.233	0.94577
ss74844411	rs12974011	All Except Skin and Sex Cancer	Diagnosed 65 To 79	0.236	0.94577
ss74846239	rs12167378	All Except Skin and Sex Cancer	Diagnosed 65 To 79	0.236	0.94577
ss74847483	rs10807170	All Except Skin and Sex Cancer	Diagnosed 65 To 79	0.238	0.94577
ss74852338	rs4942485	All Except Skin and Sex Cancer	Diagnosed 65 To 79	0.239	0.94577
ss74852518	rs9322332	All Except Skin and Sex Cancer	Diagnosed 65 To 79	0.237	0.94577
ss74852852	rs9526983	All Except Skin and Sex Cancer	Diagnosed 65 To 79	0.24	0.94577
ss74854240	rs10183143	All Except Skin and Sex Cancer	Diagnosed 65 To 79	0.234	0.94577
ss74844558	rs1007212	All Except Skin and Sex Cancer	Diagnosed 65 To 79	0.241	0.946473
ss74851350	rs6510949	All Except Skin and Sex Cancer	Diagnosed 65 To 79	0.242	0.947708
ss74807111	rs1138272	All Except Skin and Sex Cancer	Diagnosed 65 To 79	0.27	0.949793
ss74807779	rs11575194	All Except Skin and Sex Cancer	Diagnosed 65 To 79	0.251	0.949793
ss74808517	rs2584625	All Except Skin and Sex Cancer	Diagnosed 65 To 79	0.264	0.949793
ss74809470	rs1800067	All Except Skin and Sex Cancer	Diagnosed 65 To 79	0.259	0.949793
ss74811429	rs6793295	All Except Skin and Sex Cancer	Diagnosed 65 To 79	0.272	0.949793
ss74814745	rs2276583	All Except Skin and Sex Cancer	Diagnosed 65 To 79	0.272	0.949793
ss74815898	rs17651549	All Except Skin and Sex Cancer	Diagnosed 65 To 79	0.271	0.949793
ss74817863	rs11552145	All Except Skin and Sex Cancer	Diagnosed 65 To 79	0.272	0.949793
ss74821626	rs923047	All Except Skin and Sex Cancer	Diagnosed 65 To 79	0.267	0.949793
ss74823014	rs2684787	All Except Skin and Sex Cancer	Diagnosed 65 To 79	0.258	0.949793
ss74823854	rs2813549	All Except Skin and Sex Cancer	Diagnosed 65 To 79	0.27	0.949793
ss74827287	rs6900496	All Except Skin and Sex Cancer	Diagnosed 65 To 79	0.253	0.949793
ss74829487	rs12584136	All Except Skin and Sex Cancer	Diagnosed 65 To 79	0.267	0.949793
ss74833604	rs577492	All Except Skin and Sex Cancer	Diagnosed 65 To 79	0.266	0.949793
ss74834538	rs4784745	All Except Skin and Sex Cancer	Diagnosed 65 To 79	0.26	0.949793
ss74834737	rs17074679	All Except Skin and Sex Cancer	Diagnosed 65 To 79	0.264	0.949793
ss74835358	rs831016	All Except Skin and Sex Cancer	Diagnosed 65 To 79	0.251	0.949793
ss74839099	rs7731163	All Except Skin and Sex Cancer	Diagnosed 65 To 79	0.273	0.949793
ss74840052	rs11595119	All Except Skin and Sex Cancer	Diagnosed 65 To 79	0.25	0.949793
ss74845389	rs17636471	All Except Skin and Sex Cancer	Diagnosed 65 To 79	0.257	0.949793
ss74848662	rs11776693	All Except Skin and Sex Cancer	Diagnosed 65 To 79	0.249	0.949793
ss74850320	rs10498036	All Except Skin and Sex Cancer	Diagnosed 65 To 79	0.27	0.949793
ss74851290	rs2045709	All Except Skin and Sex Cancer	Diagnosed 65 To 79	0.269	0.949793
ss74851751	rs7152131	All Except Skin and Sex Cancer	Diagnosed 65 To 79	0.253	0.949793
ss74853580	rs4771246	All Except Skin and Sex Cancer	Diagnosed 65 To 79	0.263	0.949793
ss74808937	rs3732209	All Except Skin and Sex Cancer	Diagnosed 65 To 79	0.293	0.951629
ss74818366	rs7628878	All Except Skin and Sex Cancer	Diagnosed 65 To 79	0.29	0.951629
ss74818825	rs4534095	All Except Skin and Sex Cancer	Diagnosed 65 To 79	0.278	0.951629
ss74832470	rs4932370	All Except Skin and Sex Cancer	Diagnosed 65 To 79	0.28	0.951629
ss74836048	rs10226383	All Except Skin and Sex Cancer	Diagnosed 65 To 79	0.299	0.951629
ss74836835	rs11705283	All Except Skin and Sex Cancer	Diagnosed 65 To 79	0.277	0.951629
ss74839686	rs1109850	All Except Skin and Sex Cancer	Diagnosed 65 To 79	0.285	0.951629
ss74848127	rs2062054	All Except Skin and Sex Cancer	Diagnosed 65 To 79	0.283	0.951629
ss74851082	rs4545058	All Except Skin and Sex Cancer	Diagnosed 65 To 79	0.289	0.951629
ss74853013	rs9578178	All Except Skin and Sex Cancer	Diagnosed 65 To 79	0.299	0.951629
ss74806013	rs2072446	All Except Skin and Sex Cancer	Diagnosed 65 To 79	0.309	0.951806
ss74810184	rs1802127	All Except Skin and Sex Cancer	Diagnosed 65 To 79	0.312	0.951806
ss74812308	rs10445337	All Except Skin and Sex Cancer	Diagnosed 65 To 79	0.308	0.951806
ss74831779	rs3750749	All Except Skin and Sex Cancer	Diagnosed 65 To 79	0.309	0.951806
ss74833546	rs12654225	All Except Skin and Sex Cancer	Diagnosed 65 To 79	0.305	0.951806
ss74842462	rs6709162	All Except Skin and Sex Cancer	Diagnosed 65 To 79	0.302	0.951806
ss74850026	rs7787274	All Except Skin and Sex Cancer	Diagnosed 65 To 79	0.306	0.951806
ss74844461	rs10256620	All Except Skin and Sex Cancer	Diagnosed 65 To 79	0.315	0.952441
ss74806227	rs11191274	All Except Skin and Sex Cancer	Diagnosed 65 To 79	0.317	0.952453
ss74823021	rs2028827	All Except Skin and Sex Cancer	Diagnosed 65 To 79	0.318	0.952453
ss74851337	rs11776228	All Except Skin and Sex Cancer	Diagnosed 65 To 79	0.321	0.953072
ss74806043	rs1799966	All Except Skin and Sex Cancer	Diagnosed 65 To 79	0.402	0.953541
ss74806243	rs4278157	All Except Skin and Sex Cancer	Diagnosed 65 To 79	0.406	0.953541
ss74806591	rs3735782	All Except Skin and Sex Cancer	Diagnosed 65 To 79	0.381	0.953541
ss74807049	rs1128127	All Except Skin and Sex Cancer	Diagnosed 65 To 79	0.343	0.953541
ss74807128	rs2372536	All Except Skin and Sex Cancer	Diagnosed 65 To 79	0.391	0.953541
ss74807168	rs2073145	All Except Skin and Sex Cancer	Diagnosed 65 To 79	0.375	0.953541
ss74807232	rs2727288	All Except Skin and Sex Cancer	Diagnosed 65 To 79	0.342	0.953541
ss74807315	rs352493	All Except Skin and Sex Cancer	Diagnosed 65 To 79	0.324	0.953541
ss74807536	rs7642480	All Except Skin and Sex Cancer	Diagnosed 65 To 79	0.369	0.953541
ss74808723	rs6330	All Except Skin and Sex Cancer	Diagnosed 65 To 79	0.37	0.953541
ss74808952	rs11246020	All Except Skin and Sex Cancer	Diagnosed 65 To 79	0.399	0.953541
ss74808966	rs6091179	All Except Skin and Sex Cancer	Diagnosed 65 To 79	0.333	0.953541
ss74809162	rs3765148	All Except Skin and Sex Cancer	Diagnosed 65 To 79	0.342	0.953541
ss74809296	rs2237051	All Except Skin and Sex Cancer	Diagnosed 65 To 79	0.401	0.953541
ss74809381	rs743923	All Except Skin and Sex Cancer	Diagnosed 65 To 79	0.349	0.953541
ss74809487	rs8940	All Except Skin and Sex Cancer	Diagnosed 65 To 79	0.331	0.953541
ss74809627	rs1130409	All Except Skin and Sex Cancer	Diagnosed 65 To 79	0.342	0.953541
ss74810222	rs144848	All Except Skin and Sex Cancer	Diagnosed 65 To 79	0.358	0.953541
ss74810721	rs1445898	All Except Skin and Sex Cancer	Diagnosed 65 To 79	0.336	0.953541
ss74813304	rs4534403	All Except Skin and Sex Cancer	Diagnosed 65 To 79	0.38	0.953541
ss74813635	rs4986850	All Except Skin and Sex Cancer	Diagnosed 65 To 79	0.386	0.953541
ss74814842	rs11076159	All Except Skin and Sex Cancer	Diagnosed 65 To 79	0.364	0.953541
ss74815219	rs16986337	All Except Skin and Sex Cancer	Diagnosed 65 To 79	0.374	0.953541
ss74815874	rs7150924	All Except Skin and Sex Cancer	Diagnosed 65 To 79	0.394	0.953541
ss74815967	rs25665	All Except Skin and Sex Cancer	Diagnosed 65 To 79	0.402	0.953541
ss74816128	rs6856	All Except Skin and Sex Cancer	Diagnosed 65 To 79	0.402	0.953541
ss74816416	rs3810434	All Except Skin and Sex Cancer	Diagnosed 65 To 79	0.324	0.953541
ss74818421	rs7074847	All Except Skin and Sex Cancer	Diagnosed 65 To 79	0.35	0.953541
ss74818656	rs17507827	All Except Skin and Sex Cancer	Diagnosed 65 To 79	0.395	0.953541
ss74819976	rs1800777	All Except Skin and Sex Cancer	Diagnosed 65 To 79	0.368	0.953541
ss74820180	rs25667	All Except Skin and Sex Cancer	Diagnosed 65 To 79	0.362	0.953541
ss74820193	rs17082236	All Except Skin and Sex Cancer	Diagnosed 65 To 79	0.37	0.953541
ss74820211	rs17084051	All Except Skin and Sex Cancer	Diagnosed 65 To 79	0.326	0.953541
ss74822257	rs6682611	All Except Skin and Sex Cancer	Diagnosed 65 To 79	0.378	0.953541
ss74823076	rs4790849	All Except Skin and Sex Cancer	Diagnosed 65 To 79	0.348	0.953541
ss74823882	rs3815409	All Except Skin and Sex Cancer	Diagnosed 65 To 79	0.37	0.953541
ss74824539	rs3764261	All Except Skin and Sex Cancer	Diagnosed 65 To 79	0.388	0.953541
ss74824622	rs172043	All Except Skin and Sex Cancer	Diagnosed 65 To 79	0.333	0.953541
ss74824723	rs13132085	All Except Skin and Sex Cancer	Diagnosed 65 To 79	0.365	0.953541
ss74824856	rs4723036	All Except Skin and Sex Cancer	Diagnosed 65 To 79	0.327	0.953541
ss74825523	rs768039	All Except Skin and Sex Cancer	Diagnosed 65 To 79	0.323	0.953541
ss74825807	rs7217735	All Except Skin and Sex Cancer	Diagnosed 65 To 79	0.34	0.953541
ss74825812	rs1882928	All Except Skin and Sex Cancer	Diagnosed 65 To 79	0.365	0.953541
ss74825826	rs17183763	All Except Skin and Sex Cancer	Diagnosed 65 To 79	0.322	0.953541
ss74826421	rs3729573	All Except Skin and Sex Cancer	Diagnosed 65 To 79	0.395	0.953541
ss74826708	rs2299260	All Except Skin and Sex Cancer	Diagnosed 65 To 79	0.334	0.953541
ss74828258	rs9817981	All Except Skin and Sex Cancer	Diagnosed 65 To 79	0.333	0.953541
ss74828420	rs325247	All Except Skin and Sex Cancer	Diagnosed 65 To 79	0.374	0.953541
ss74828552	rs3824730	All Except Skin and Sex Cancer	Diagnosed 65 To 79	0.323	0.953541
ss74828658	rs757232	All Except Skin and Sex Cancer	Diagnosed 65 To 79	0.368	0.953541
ss74828801	rs4954119	All Except Skin and Sex Cancer	Diagnosed 65 To 79	0.352	0.953541
ss74828907	rs7968701	All Except Skin and Sex Cancer	Diagnosed 65 To 79	0.356	0.953541
ss74829307	rs12703107	All Except Skin and Sex Cancer	Diagnosed 65 To 79	0.364	0.953541
ss74829903	rs2829916	All Except Skin and Sex Cancer	Diagnosed 65 To 79	0.336	0.953541
ss74830375	rs1331138	All Except Skin and Sex Cancer	Diagnosed 65 To 79	0.327	0.953541
ss74830760	rs5762734	All Except Skin and Sex Cancer	Diagnosed 65 To 79	0.349	0.953541
ss74831140	rs2282806	All Except Skin and Sex Cancer	Diagnosed 65 To 79	0.405	0.953541
ss74831485	rs7465523	All Except Skin and Sex Cancer	Diagnosed 65 To 79	0.356	0.953541
ss74831986	rs933208	All Except Skin and Sex Cancer	Diagnosed 65 To 79	0.347	0.953541
ss74832221	rs294185	All Except Skin and Sex Cancer	Diagnosed 65 To 79	0.368	0.953541
ss74834097	rs17159769	All Except Skin and Sex Cancer	Diagnosed 65 To 79	0.338	0.953541
ss74834675	rs10503927	All Except Skin and Sex Cancer	Diagnosed 65 To 79	0.356	0.953541
ss74836112	rs3793786	All Except Skin and Sex Cancer	Diagnosed 65 To 79	0.385	0.953541
ss74836676	rs2292979	All Except Skin and Sex Cancer	Diagnosed 65 To 79	0.401	0.953541
ss74838337	rs13335668	All Except Skin and Sex Cancer	Diagnosed 65 To 79	0.343	0.953541
ss74838446	rs17686310	All Except Skin and Sex Cancer	Diagnosed 65 To 79	0.363	0.953541
ss74839347	rs7516258	All Except Skin and Sex Cancer	Diagnosed 65 To 79	0.338	0.953541
ss74839922	rs10793069	All Except Skin and Sex Cancer	Diagnosed 65 To 79	0.366	0.953541
ss74840168	rs2671686	All Except Skin and Sex Cancer	Diagnosed 65 To 79	0.33	0.953541
ss74840607	rs4733119	All Except Skin and Sex Cancer	Diagnosed 65 To 79	0.382	0.953541
ss74841413	rs1858015	All Except Skin and Sex Cancer	Diagnosed 65 To 79	0.383	0.953541
ss74841481	rs3799698	All Except Skin and Sex Cancer	Diagnosed 65 To 79	0.402	0.953541
ss74841534	rs2975647	All Except Skin and Sex Cancer	Diagnosed 65 To 79	0.362	0.953541
ss74842864	rs2098684	All Except Skin and Sex Cancer	Diagnosed 65 To 79	0.367	0.953541
ss74843920	rs828923	All Except Skin and Sex Cancer	Diagnosed 65 To 79	0.385	0.953541
ss74844317	rs17151147	All Except Skin and Sex Cancer	Diagnosed 65 To 79	0.346	0.953541
ss74844918	rs17692629	All Except Skin and Sex Cancer	Diagnosed 65 To 79	0.403	0.953541
ss74845399	rs1475848	All Except Skin and Sex Cancer	Diagnosed 65 To 79	0.374	0.953541
ss74845673	rs3917586	All Except Skin and Sex Cancer	Diagnosed 65 To 79	0.347	0.953541
ss74845924	rs9397085	All Except Skin and Sex Cancer	Diagnosed 65 To 79	0.358	0.953541
ss74847353	rs6511867	All Except Skin and Sex Cancer	Diagnosed 65 To 79	0.344	0.953541
ss74848808	rs13228494	All Except Skin and Sex Cancer	Diagnosed 65 To 79	0.374	0.953541
ss74849696	rs16827106	All Except Skin and Sex Cancer	Diagnosed 65 To 79	0.336	0.953541
ss74850855	rs4647081	All Except Skin and Sex Cancer	Diagnosed 65 To 79	0.382	0.953541
ss74851443	rs9508019	All Except Skin and Sex Cancer	Diagnosed 65 To 79	0.336	0.953541
ss74851962	rs1322454	All Except Skin and Sex Cancer	Diagnosed 65 To 79	0.394	0.953541
ss74852875	rs1981331	All Except Skin and Sex Cancer	Diagnosed 65 To 79	0.403	0.953541
ss74852899	rs1240402	All Except Skin and Sex Cancer	Diagnosed 65 To 79	0.363	0.953541
ss74853206	rs524900	All Except Skin and Sex Cancer	Diagnosed 65 To 79	0.335	0.953541
ss74853476	rs3770507	All Except Skin and Sex Cancer	Diagnosed 65 To 79	0.376	0.953541
ss74854923	rs17175194	All Except Skin and Sex Cancer	Diagnosed 65 To 79	0.327	0.953541
ss74832411	rs11155813	All Except Skin and Sex Cancer	Diagnosed 65 To 79	0.408	0.95467
ss74844096	rs2806635	All Except Skin and Sex Cancer	Diagnosed 65 To 79	0.408	0.95467
ss74843932	rs2287497	All Except Skin and Sex Cancer	Diagnosed 65 To 79	0.409	0.95507
ss74835747	rs11155806	All Except Skin and Sex Cancer	Diagnosed 65 To 79	0.41	0.955147
ss74813364	rs8130507	All Except Skin and Sex Cancer	Diagnosed 65 To 79	0.411	0.955544
ss74839807	rs4469064	All Except Skin and Sex Cancer	Diagnosed 65 To 79	0.411	0.955544
ss74821242	rs6123711	All Except Skin and Sex Cancer	Diagnosed 65 To 79	0.413	0.95694
ss74822134	rs1125156	All Except Skin and Sex Cancer	Diagnosed 65 To 79	0.417	0.95694
ss74831947	rs13074111	All Except Skin and Sex Cancer	Diagnosed 65 To 79	0.414	0.95694
ss74836965	rs12656918	All Except Skin and Sex Cancer	Diagnosed 65 To 79	0.413	0.95694
ss74844938	rs11101340	All Except Skin and Sex Cancer	Diagnosed 65 To 79	0.414	0.95694
ss74848257	rs728064	All Except Skin and Sex Cancer	Diagnosed 65 To 79	0.416	0.95694
ss74825716	rs2070776	All Except Skin and Sex Cancer	Diagnosed 65 To 79	0.42	0.957783
ss74829802	rs2815164	All Except Skin and Sex Cancer	Diagnosed 65 To 79	0.42	0.957783
ss74814521	rs13157845	All Except Skin and Sex Cancer	Diagnosed 65 To 79	0.423	0.958681
ss74849325	rs10932196	All Except Skin and Sex Cancer	Diagnosed 65 To 79	0.421	0.958681
ss74853010	rs12521860	All Except Skin and Sex Cancer	Diagnosed 65 To 79	0.424	0.958681
ss74831116	rs867512	All Except Skin and Sex Cancer	Diagnosed 65 To 79	0.427	0.958877
ss74832342	rs6477748	All Except Skin and Sex Cancer	Diagnosed 65 To 79	0.43	0.961553
ss74806169	rs12408890	All Except Skin and Sex Cancer	Diagnosed 65 To 79	0.435	0.961816
ss74806494	rs16942	All Except Skin and Sex Cancer	Diagnosed 65 To 79	0.444	0.961816
ss74806596	rs2228246	All Except Skin and Sex Cancer	Diagnosed 65 To 79	0.437	0.961816
ss74807134	rs2229263	All Except Skin and Sex Cancer	Diagnosed 65 To 79	0.436	0.961816
ss74810931	rs4811888	All Except Skin and Sex Cancer	Diagnosed 65 To 79	0.431	0.961816
ss74811153	rs2866413	All Except Skin and Sex Cancer	Diagnosed 65 To 79	0.435	0.961816
ss74811414	rs2283432	All Except Skin and Sex Cancer	Diagnosed 65 To 79	0.431	0.961816
ss74814782	rs1864750	All Except Skin and Sex Cancer	Diagnosed 65 To 79	0.435	0.961816
ss74815650	rs16965150	All Except Skin and Sex Cancer	Diagnosed 65 To 79	0.445	0.961816
ss74819611	rs9554897	All Except Skin and Sex Cancer	Diagnosed 65 To 79	0.442	0.961816
ss74822976	rs9900373	All Except Skin and Sex Cancer	Diagnosed 65 To 79	0.434	0.961816
ss74824337	rs788754	All Except Skin and Sex Cancer	Diagnosed 65 To 79	0.447	0.961816
ss74825039	rs2240780	All Except Skin and Sex Cancer	Diagnosed 65 To 79	0.442	0.961816
ss74825471	rs17105765	All Except Skin and Sex Cancer	Diagnosed 65 To 79	0.436	0.961816
ss74825654	rs10774223	All Except Skin and Sex Cancer	Diagnosed 65 To 79	0.443	0.961816
ss74826189	rs12544802	All Except Skin and Sex Cancer	Diagnosed 65 To 79	0.438	0.961816
ss74828891	rs2275008	All Except Skin and Sex Cancer	Diagnosed 65 To 79	0.454	0.961816
ss74829229	rs16969771	All Except Skin and Sex Cancer	Diagnosed 65 To 79	0.45	0.961816
ss74829691	rs8062645	All Except Skin and Sex Cancer	Diagnosed 65 To 79	0.441	0.961816
ss74830935	rs1234225	All Except Skin and Sex Cancer	Diagnosed 65 To 79	0.456	0.961816
ss74836216	rs11847466	All Except Skin and Sex Cancer	Diagnosed 65 To 79	0.44	0.961816
ss74836748	rs4688054	All Except Skin and Sex Cancer	Diagnosed 65 To 79	0.434	0.961816
ss74839488	rs4839542	All Except Skin and Sex Cancer	Diagnosed 65 To 79	0.449	0.961816
ss74840565	rs6983315	All Except Skin and Sex Cancer	Diagnosed 65 To 79	0.453	0.961816
ss74840667	rs2013080	All Except Skin and Sex Cancer	Diagnosed 65 To 79	0.446	0.961816
ss74840885	rs4804469	All Except Skin and Sex Cancer	Diagnosed 65 To 79	0.453	0.961816
ss74841035	rs17637318	All Except Skin and Sex Cancer	Diagnosed 65 To 79	0.452	0.961816
ss74843820	rs11802954	All Except Skin and Sex Cancer	Diagnosed 65 To 79	0.452	0.961816
ss74846861	rs7246772	All Except Skin and Sex Cancer	Diagnosed 65 To 79	0.447	0.961816
ss74852216	rs13268778	All Except Skin and Sex Cancer	Diagnosed 65 To 79	0.436	0.961816
ss74822807	rs7844115	All Except Skin and Sex Cancer	Diagnosed 65 To 79	0.457	0.961871
ss74828237	rs8181047	All Except Skin and Sex Cancer	Diagnosed 65 To 79	0.461	0.962959
ss74833087	rs9514039	All Except Skin and Sex Cancer	Diagnosed 65 To 79	0.458	0.962959
ss74834269	rs2472739	All Except Skin and Sex Cancer	Diagnosed 65 To 79	0.461	0.962959
ss74842725	rs9466075	All Except Skin and Sex Cancer	Diagnosed 65 To 79	0.461	0.962959
ss74843980	rs17151244	All Except Skin and Sex Cancer	Diagnosed 65 To 79	0.461	0.962959
ss74851822	rs12588378	All Except Skin and Sex Cancer	Diagnosed 65 To 79	0.458	0.962959
ss74821696	rs4150360	All Except Skin and Sex Cancer	Diagnosed 65 To 79	0.464	0.963692
ss74806905	rs7535144	All Except Skin and Sex Cancer	Diagnosed 65 To 79	0.469	0.964561
ss74817929	rs9610645	All Except Skin and Sex Cancer	Diagnosed 65 To 79	0.468	0.964561
ss74825161	rs4550905	All Except Skin and Sex Cancer	Diagnosed 65 To 79	0.469	0.964561
ss74825689	rs6092495	All Except Skin and Sex Cancer	Diagnosed 65 To 79	0.466	0.964561
ss74834378	rs949155	All Except Skin and Sex Cancer	Diagnosed 65 To 79	0.47	0.964561
ss74854328	rs719452	All Except Skin and Sex Cancer	Diagnosed 65 To 79	0.466	0.964561
ss74816615	rs11671617	All Except Skin and Sex Cancer	Diagnosed 65 To 79	0.472	0.965226
ss74822427	rs659366	All Except Skin and Sex Cancer	Diagnosed 65 To 79	0.472	0.965226
ss74828661	rs7017734	All Except Skin and Sex Cancer	Diagnosed 65 To 79	0.473	0.965272
ss74845563	rs10817866	All Except Skin and Sex Cancer	Diagnosed 65 To 79	0.473	0.965272
ss74808914	rs799917	All Except Skin and Sex Cancer	Diagnosed 65 To 79	0.474	0.965318
ss74813853	rs9300756	All Except Skin and Sex Cancer	Diagnosed 65 To 79	0.474	0.965318
ss74838357	rs3760627	All Except Skin and Sex Cancer	Diagnosed 65 To 79	0.477	0.966063
ss74849286	rs7069590	All Except Skin and Sex Cancer	Diagnosed 65 To 79	0.478	0.966063
ss74823482	rs6601455	All Except Skin and Sex Cancer	Diagnosed 65 To 79	0.479	0.966389
ss74808881	rs3735781	All Except Skin and Sex Cancer	Diagnosed 65 To 79	0.483	0.966407
ss74829993	rs10517002	All Except Skin and Sex Cancer	Diagnosed 65 To 79	0.483	0.966407
ss74841986	rs13099828	All Except Skin and Sex Cancer	Diagnosed 65 To 79	0.485	0.966407
ss74852235	rs129600	All Except Skin and Sex Cancer	Diagnosed 65 To 79	0.484	0.966407
ss74806787	rs7487683	All Except Skin and Sex Cancer	Diagnosed 65 To 79	0.488	0.966769
ss74811214	rs641320	All Except Skin and Sex Cancer	Diagnosed 65 To 79	0.488	0.966769
ss74829801	rs4930210	All Except Skin and Sex Cancer	Diagnosed 65 To 79	0.488	0.966769
ss74806252	rs11666105	All Except Skin and Sex Cancer	Diagnosed 65 To 79	0.498	0.966794
ss74823865	rs833068	All Except Skin and Sex Cancer	Diagnosed 65 To 79	0.5	0.966794
ss74826297	rs7969751	All Except Skin and Sex Cancer	Diagnosed 65 To 79	0.494	0.966794
ss74827918	rs10759398	All Except Skin and Sex Cancer	Diagnosed 65 To 79	0.492	0.966794
ss74831055	rs959173	All Except Skin and Sex Cancer	Diagnosed 65 To 79	0.491	0.966794
ss74834264	rs2919384	All Except Skin and Sex Cancer	Diagnosed 65 To 79	0.499	0.966794
ss74838397	rs7519821	All Except Skin and Sex Cancer	Diagnosed 65 To 79	0.502	0.966794
ss74836250	rs2302535	All Except Skin and Sex Cancer	Diagnosed 65 To 79	0.504	0.968487
ss74806378	rs10813831	All Except Skin and Sex Cancer	Diagnosed 65 To 79	0.565	0.96855
ss74806562	rs6180	All Except Skin and Sex Cancer	Diagnosed 65 To 79	0.568	0.96855
ss74806659	rs3742769	All Except Skin and Sex Cancer	Diagnosed 65 To 79	0.552	0.96855
ss74806904	rs2297792	All Except Skin and Sex Cancer	Diagnosed 65 To 79	0.521	0.96855
ss74807088	rs675	All Except Skin and Sex Cancer	Diagnosed 65 To 79	0.542	0.96855
ss74807660	rs7020782	All Except Skin and Sex Cancer	Diagnosed 65 To 79	0.526	0.96855
ss74807817	rs6025606	All Except Skin and Sex Cancer	Diagnosed 65 To 79	0.531	0.96855
ss74807989	rs669	All Except Skin and Sex Cancer	Diagnosed 65 To 79	0.558	0.96855
ss74811691	rs1805094	All Except Skin and Sex Cancer	Diagnosed 65 To 79	0.528	0.96855
ss74812228	rs4903104	All Except Skin and Sex Cancer	Diagnosed 65 To 79	0.538	0.96855
ss74813034	rs10471774	All Except Skin and Sex Cancer	Diagnosed 65 To 79	0.54	0.96855
ss74814434	rs12973496	All Except Skin and Sex Cancer	Diagnosed 65 To 79	0.562	0.96855
ss74815195	rs2071307	All Except Skin and Sex Cancer	Diagnosed 65 To 79	0.556	0.96855
ss74815818	rs12973246	All Except Skin and Sex Cancer	Diagnosed 65 To 79	0.535	0.96855
ss74816309	rs13059911	All Except Skin and Sex Cancer	Diagnosed 65 To 79	0.515	0.96855
ss74818935	rs1799977	All Except Skin and Sex Cancer	Diagnosed 65 To 79	0.531	0.96855
ss74820753	rs17077568	All Except Skin and Sex Cancer	Diagnosed 65 To 79	0.525	0.96855
ss74820896	rs17077569	All Except Skin and Sex Cancer	Diagnosed 65 To 79	0.574	0.96855
ss74822855	rs12370377	All Except Skin and Sex Cancer	Diagnosed 65 To 79	0.525	0.96855
ss74822876	rs2176397	All Except Skin and Sex Cancer	Diagnosed 65 To 79	0.522	0.96855
ss74825273	rs565093	All Except Skin and Sex Cancer	Diagnosed 65 To 79	0.529	0.96855
ss74826099	rs1061621	All Except Skin and Sex Cancer	Diagnosed 65 To 79	0.505	0.96855
ss74826239	rs3764621	All Except Skin and Sex Cancer	Diagnosed 65 To 79	0.538	0.96855
ss74826532	rs541955	All Except Skin and Sex Cancer	Diagnosed 65 To 79	0.551	0.96855
ss74826686	rs4993000	All Except Skin and Sex Cancer	Diagnosed 65 To 79	0.533	0.96855
ss74827301	rs3781207	All Except Skin and Sex Cancer	Diagnosed 65 To 79	0.545	0.96855
ss74827341	rs9816377	All Except Skin and Sex Cancer	Diagnosed 65 To 79	0.537	0.96855
ss74830949	rs3904629	All Except Skin and Sex Cancer	Diagnosed 65 To 79	0.572	0.96855
ss74831236	rs6840502	All Except Skin and Sex Cancer	Diagnosed 65 To 79	0.572	0.96855
ss74831537	rs10152173	All Except Skin and Sex Cancer	Diagnosed 65 To 79	0.542	0.96855
ss74831570	rs17286989	All Except Skin and Sex Cancer	Diagnosed 65 To 79	0.536	0.96855
ss74832125	rs11642606	All Except Skin and Sex Cancer	Diagnosed 65 To 79	0.57	0.96855
ss74833923	rs11796	All Except Skin and Sex Cancer	Diagnosed 65 To 79	0.517	0.96855
ss74834745	rs2322718	All Except Skin and Sex Cancer	Diagnosed 65 To 79	0.575	0.96855
ss74835005	rs12451026	All Except Skin and Sex Cancer	Diagnosed 65 To 79	0.556	0.96855
ss74835108	rs6025617	All Except Skin and Sex Cancer	Diagnosed 65 To 79	0.576	0.96855
ss74835398	rs2727270	All Except Skin and Sex Cancer	Diagnosed 65 To 79	0.521	0.96855
ss74836167	rs7711960	All Except Skin and Sex Cancer	Diagnosed 65 To 79	0.541	0.96855
ss74836584	rs300984	All Except Skin and Sex Cancer	Diagnosed 65 To 79	0.541	0.96855
ss74837589	rs3742825	All Except Skin and Sex Cancer	Diagnosed 65 To 79	0.543	0.96855
ss74838123	rs4855094	All Except Skin and Sex Cancer	Diagnosed 65 To 79	0.547	0.96855
ss74841498	rs4792825	All Except Skin and Sex Cancer	Diagnosed 65 To 79	0.558	0.96855
ss74841653	rs12170612	All Except Skin and Sex Cancer	Diagnosed 65 To 79	0.569	0.96855
ss74841784	rs759117	All Except Skin and Sex Cancer	Diagnosed 65 To 79	0.519	0.96855
ss74841905	rs10735067	All Except Skin and Sex Cancer	Diagnosed 65 To 79	0.569	0.96855
ss74842441	rs11668751	All Except Skin and Sex Cancer	Diagnosed 65 To 79	0.573	0.96855
ss74843760	rs7175387	All Except Skin and Sex Cancer	Diagnosed 65 To 79	0.576	0.96855
ss74845232	rs9937539	All Except Skin and Sex Cancer	Diagnosed 65 To 79	0.567	0.96855
ss74845838	rs12492392	All Except Skin and Sex Cancer	Diagnosed 65 To 79	0.549	0.96855
ss74846390	rs17710825	All Except Skin and Sex Cancer	Diagnosed 65 To 79	0.557	0.96855
ss74846917	rs2583762	All Except Skin and Sex Cancer	Diagnosed 65 To 79	0.556	0.96855
ss74847021	rs7003988	All Except Skin and Sex Cancer	Diagnosed 65 To 79	0.516	0.96855
ss74847141	rs10072121	All Except Skin and Sex Cancer	Diagnosed 65 To 79	0.568	0.96855
ss74848945	rs1813323	All Except Skin and Sex Cancer	Diagnosed 65 To 79	0.529	0.96855
ss74851252	rs11919783	All Except Skin and Sex Cancer	Diagnosed 65 To 79	0.577	0.96855
ss74851417	rs7463426	All Except Skin and Sex Cancer	Diagnosed 65 To 79	0.547	0.96855
ss74852213	rs2551402	All Except Skin and Sex Cancer	Diagnosed 65 To 79	0.552	0.96855
ss74852792	rs9808108	All Except Skin and Sex Cancer	Diagnosed 65 To 79	0.567	0.96855
ss74853038	rs9831515	All Except Skin and Sex Cancer	Diagnosed 65 To 79	0.542	0.96855
ss74853381	rs4417316	All Except Skin and Sex Cancer	Diagnosed 65 To 79	0.522	0.96855
ss74853616	rs9518861	All Except Skin and Sex Cancer	Diagnosed 65 To 79	0.556	0.96855
ss74853780	rs710035	All Except Skin and Sex Cancer	Diagnosed 65 To 79	0.567	0.96855
ss74854483	rs7619370	All Except Skin and Sex Cancer	Diagnosed 65 To 79	0.548	0.96855
ss74854628	rs350887	All Except Skin and Sex Cancer	Diagnosed 65 To 79	0.534	0.96855
ss74845090	rs715219	All Except Skin and Sex Cancer	Diagnosed 65 To 79	0.58	0.96905
ss74824838	rs4406451	All Except Skin and Sex Cancer	Diagnosed 65 To 79	0.581	0.969549
ss74828513	rs2426158	All Except Skin and Sex Cancer	Diagnosed 65 To 79	0.581	0.969549
ss74823286	rs768775	All Except Skin and Sex Cancer	Diagnosed 65 To 79	0.584	0.970572
ss74807444	rs4073918	All Except Skin and Sex Cancer	Diagnosed 65 To 79	0.585	0.970833
ss74826037	rs3786680	All Except Skin and Sex Cancer	Diagnosed 65 To 79	0.585	0.970833
ss74826340	rs8113281	All Except Skin and Sex Cancer	Diagnosed 65 To 79	0.588	0.971148
ss74814603	rs12254856	All Except Skin and Sex Cancer	Diagnosed 65 To 79	0.592	0.972642
ss74840936	rs11208647	All Except Skin and Sex Cancer	Diagnosed 65 To 79	0.59	0.972642
ss74851051	rs12865518	All Except Skin and Sex Cancer	Diagnosed 65 To 79	0.594	0.973152
ss74806798	rs1181883	All Except Skin and Sex Cancer	Diagnosed 65 To 79	0.595	0.973406
ss74811238	rs17655	All Except Skin and Sex Cancer	Diagnosed 65 To 79	0.597	0.974153
ss74838553	rs17320841	All Except Skin and Sex Cancer	Diagnosed 65 To 79	0.608	0.974153
ss74839306	rs2277694	All Except Skin and Sex Cancer	Diagnosed 65 To 79	0.606	0.974153
ss74841944	rs13320980	All Except Skin and Sex Cancer	Diagnosed 65 To 79	0.605	0.974153
ss74847174	rs1510955	All Except Skin and Sex Cancer	Diagnosed 65 To 79	0.608	0.974153
ss74848461	rs9436739	All Except Skin and Sex Cancer	Diagnosed 65 To 79	0.601	0.974153
ss74853460	rs3853251	All Except Skin and Sex Cancer	Diagnosed 65 To 79	0.599	0.974153
ss74806706	rs1110627	All Except Skin and Sex Cancer	Diagnosed 65 To 79	0.609	0.974421
ss74821192	rs2230461	All Except Skin and Sex Cancer	Diagnosed 65 To 79	0.609	0.974421
ss74840927	rs4841324	All Except Skin and Sex Cancer	Diagnosed 65 To 79	0.61	0.974421
ss74834336	rs4807942	All Except Skin and Sex Cancer	Diagnosed 65 To 79	0.611	0.974892
ss74852546	rs1052990	All Except Skin and Sex Cancer	Diagnosed 65 To 79	0.614	0.975849
ss74805906	rs13894	All Except Skin and Sex Cancer	Diagnosed 65 To 79	0.642	0.976563
ss74806253	rs2270941	All Except Skin and Sex Cancer	Diagnosed 65 To 79	0.616	0.976563
ss74806877	rs2071307	All Except Skin and Sex Cancer	Diagnosed 65 To 79	0.617	0.976563
ss74807443	rs11202902	All Except Skin and Sex Cancer	Diagnosed 65 To 79	0.621	0.976563
ss74807493	rs10853751	All Except Skin and Sex Cancer	Diagnosed 65 To 79	0.632	0.976563
ss74808227	rs2736182	All Except Skin and Sex Cancer	Diagnosed 65 To 79	0.63	0.976563
ss74809142	rs2140516	All Except Skin and Sex Cancer	Diagnosed 65 To 79	0.641	0.976563
ss74810433	rs28583298	All Except Skin and Sex Cancer	Diagnosed 65 To 79	0.627	0.976563
ss74811810	rs2227928	All Except Skin and Sex Cancer	Diagnosed 65 To 79	0.618	0.976563
ss74813428	rs11657835	All Except Skin and Sex Cancer	Diagnosed 65 To 79	0.618	0.976563
ss74813579	rs10282312	All Except Skin and Sex Cancer	Diagnosed 65 To 79	0.619	0.976563
ss74815171	rs17495945	All Except Skin and Sex Cancer	Diagnosed 65 To 79	0.624	0.976563
ss74818528	rs936018	All Except Skin and Sex Cancer	Diagnosed 65 To 79	0.641	0.976563
ss74822412	rs2238337	All Except Skin and Sex Cancer	Diagnosed 65 To 79	0.63	0.976563
ss74823806	rs12065184	All Except Skin and Sex Cancer	Diagnosed 65 To 79	0.618	0.976563
ss74830175	rs13218209	All Except Skin and Sex Cancer	Diagnosed 65 To 79	0.626	0.976563
ss74832444	rs11202596	All Except Skin and Sex Cancer	Diagnosed 65 To 79	0.642	0.976563
ss74833319	rs9927820	All Except Skin and Sex Cancer	Diagnosed 65 To 79	0.626	0.976563
ss74838941	rs932480	All Except Skin and Sex Cancer	Diagnosed 65 To 79	0.638	0.976563
ss74840122	rs738470	All Except Skin and Sex Cancer	Diagnosed 65 To 79	0.639	0.976563
ss74840681	rs214260	All Except Skin and Sex Cancer	Diagnosed 65 To 79	0.641	0.976563
ss74841345	rs1884052	All Except Skin and Sex Cancer	Diagnosed 65 To 79	0.632	0.976563
ss74849229	rs9534156	All Except Skin and Sex Cancer	Diagnosed 65 To 79	0.632	0.976563
ss74852389	rs2147420	All Except Skin and Sex Cancer	Diagnosed 65 To 79	0.636	0.976563
ss74808628	rs3924999	All Except Skin and Sex Cancer	Diagnosed 65 To 79	0.657	0.976888
ss74810725	rs10889205	All Except Skin and Sex Cancer	Diagnosed 65 To 79	0.65	0.976888
ss74811773	rs2412544	All Except Skin and Sex Cancer	Diagnosed 65 To 79	0.656	0.976888
ss74814474	rs10972281	All Except Skin and Sex Cancer	Diagnosed 65 To 79	0.648	0.976888
ss74815483	rs9764398	All Except Skin and Sex Cancer	Diagnosed 65 To 79	0.644	0.976888
ss74817170	rs17449032	All Except Skin and Sex Cancer	Diagnosed 65 To 79	0.661	0.976888
ss74818335	rs12609001	All Except Skin and Sex Cancer	Diagnosed 65 To 79	0.657	0.976888
ss74818384	rs17592438	All Except Skin and Sex Cancer	Diagnosed 65 To 79	0.656	0.976888
ss74823026	rs12987817	All Except Skin and Sex Cancer	Diagnosed 65 To 79	0.653	0.976888
ss74823953	rs1465693	All Except Skin and Sex Cancer	Diagnosed 65 To 79	0.658	0.976888
ss74824896	rs1597568	All Except Skin and Sex Cancer	Diagnosed 65 To 79	0.657	0.976888
ss74825032	rs2159173	All Except Skin and Sex Cancer	Diagnosed 65 To 79	0.647	0.976888
ss74829444	rs11621511	All Except Skin and Sex Cancer	Diagnosed 65 To 79	0.646	0.976888
ss74830403	rs13207511	All Except Skin and Sex Cancer	Diagnosed 65 To 79	0.65	0.976888
ss74832559	rs1521191	All Except Skin and Sex Cancer	Diagnosed 65 To 79	0.645	0.976888
ss74832806	rs1319859	All Except Skin and Sex Cancer	Diagnosed 65 To 79	0.659	0.976888
ss74834012	rs7215972	All Except Skin and Sex Cancer	Diagnosed 65 To 79	0.661	0.976888
ss74836418	rs17725712	All Except Skin and Sex Cancer	Diagnosed 65 To 79	0.655	0.976888
ss74838606	rs16959569	All Except Skin and Sex Cancer	Diagnosed 65 To 79	0.659	0.976888
ss74839138	rs4841283	All Except Skin and Sex Cancer	Diagnosed 65 To 79	0.659	0.976888
ss74840271	rs4821595	All Except Skin and Sex Cancer	Diagnosed 65 To 79	0.657	0.976888
ss74853256	rs1560333	All Except Skin and Sex Cancer	Diagnosed 65 To 79	0.661	0.976888
ss74854111	rs10025625	All Except Skin and Sex Cancer	Diagnosed 65 To 79	0.646	0.976888
ss74817386	rs7302230	All Except Skin and Sex Cancer	Diagnosed 65 To 79	0.663	0.976997
ss74824639	rs10857584	All Except Skin and Sex Cancer	Diagnosed 65 To 79	0.664	0.976997
ss74833712	rs2031749	All Except Skin and Sex Cancer	Diagnosed 65 To 79	0.665	0.976997
ss74836650	rs10794486	All Except Skin and Sex Cancer	Diagnosed 65 To 79	0.669	0.976997
ss74837273	rs7982957	All Except Skin and Sex Cancer	Diagnosed 65 To 79	0.668	0.976997
ss74809099	rs4253211	All Except Skin and Sex Cancer	Diagnosed 65 To 79	0.67	0.977219
ss74808280	rs2227956	All Except Skin and Sex Cancer	Diagnosed 65 To 79	0.684	0.97783
ss74808855	rs764205	All Except Skin and Sex Cancer	Diagnosed 65 To 79	0.684	0.97783
ss74814353	rs7145318	All Except Skin and Sex Cancer	Diagnosed 65 To 79	0.676	0.97783
ss74818987	rs17713154	All Except Skin and Sex Cancer	Diagnosed 65 To 79	0.684	0.97783
ss74822606	rs11102924	All Except Skin and Sex Cancer	Diagnosed 65 To 79	0.676	0.97783
ss74823108	rs910923	All Except Skin and Sex Cancer	Diagnosed 65 To 79	0.674	0.97783
ss74823706	rs8030950	All Except Skin and Sex Cancer	Diagnosed 65 To 79	0.675	0.97783
ss74824273	rs1967439	All Except Skin and Sex Cancer	Diagnosed 65 To 79	0.682	0.97783
ss74825823	rs2111959	All Except Skin and Sex Cancer	Diagnosed 65 To 79	0.682	0.97783
ss74828867	rs9804485	All Except Skin and Sex Cancer	Diagnosed 65 To 79	0.678	0.97783
ss74830853	rs6984111	All Except Skin and Sex Cancer	Diagnosed 65 To 79	0.684	0.97783
ss74832640	rs10106875	All Except Skin and Sex Cancer	Diagnosed 65 To 79	0.673	0.97783
ss74838838	rs1888869	All Except Skin and Sex Cancer	Diagnosed 65 To 79	0.681	0.97783
ss74839853	rs244468	All Except Skin and Sex Cancer	Diagnosed 65 To 79	0.682	0.97783
ss74845057	rs17057406	All Except Skin and Sex Cancer	Diagnosed 65 To 79	0.682	0.97783
ss74851721	rs12883097	All Except Skin and Sex Cancer	Diagnosed 65 To 79	0.678	0.97783
ss74852243	rs11102922	All Except Skin and Sex Cancer	Diagnosed 65 To 79	0.68	0.97783
ss74852659	rs480575	All Except Skin and Sex Cancer	Diagnosed 65 To 79	0.682	0.97783
ss74814453	rs17707331	All Except Skin and Sex Cancer	Diagnosed 65 To 79	0.685	0.977844
ss74806316	rs12717	All Except Skin and Sex Cancer	Diagnosed 65 To 79	0.689	0.979553
ss74826010	rs6574115	All Except Skin and Sex Cancer	Diagnosed 65 To 79	0.692	0.979553
ss74832556	rs7075182	All Except Skin and Sex Cancer	Diagnosed 65 To 79	0.693	0.979553
ss74834338	rs12214476	All Except Skin and Sex Cancer	Diagnosed 65 To 79	0.691	0.979553
ss74845312	rs9513116	All Except Skin and Sex Cancer	Diagnosed 65 To 79	0.691	0.979553
ss74808776	rs11229	All Except Skin and Sex Cancer	Diagnosed 65 To 79	0.697	0.980396
ss74837012	rs2412545	All Except Skin and Sex Cancer	Diagnosed 65 To 79	0.697	0.980396
ss74808978	rs2217332	All Except Skin and Sex Cancer	Diagnosed 65 To 79	0.698	0.981203
ss74810802	rs2228526	All Except Skin and Sex Cancer	Diagnosed 65 To 79	0.698	0.981203
ss74808832	rs7527596	All Except Skin and Sex Cancer	Diagnosed 65 To 79	0.7	0.982217
ss74822467	rs12421762	All Except Skin and Sex Cancer	Diagnosed 65 To 79	0.7	0.982217
ss74829545	rs831007	All Except Skin and Sex Cancer	Diagnosed 65 To 79	0.702	0.982629
ss74822202	rs3744231	All Except Skin and Sex Cancer	Diagnosed 65 To 79	0.708	0.983262
ss74828961	rs2389557	All Except Skin and Sex Cancer	Diagnosed 65 To 79	0.708	0.983262
ss74828957	rs1997791	All Except Skin and Sex Cancer	Diagnosed 65 To 79	0.709	0.983663
ss74809031	rs1801376	All Except Skin and Sex Cancer	Diagnosed 65 To 79	0.711	0.984867
ss74816654	rs12225230	All Except Skin and Sex Cancer	Diagnosed 65 To 79	0.713	0.984867
ss74823322	rs761779	All Except Skin and Sex Cancer	Diagnosed 65 To 79	0.712	0.984867
ss74853006	rs10490595	All Except Skin and Sex Cancer	Diagnosed 65 To 79	0.713	0.984867
ss74848270	rs10513055	All Except Skin and Sex Cancer	Diagnosed 65 To 79	0.717	0.986053
ss74819573	rs17010021	All Except Skin and Sex Cancer	Diagnosed 65 To 79	0.719	0.986063
ss74828130	rs1481120	All Except Skin and Sex Cancer	Diagnosed 65 To 79	0.718	0.986063
ss74828171	rs1811322	All Except Skin and Sex Cancer	Diagnosed 65 To 79	0.721	0.986063
ss74839982	rs4771644	All Except Skin and Sex Cancer	Diagnosed 65 To 79	0.722	0.986063
ss74853454	rs6816508	All Except Skin and Sex Cancer	Diagnosed 65 To 79	0.722	0.986063
ss74808432	rs11568943	All Except Skin and Sex Cancer	Diagnosed 65 To 79	0.727	0.986266
ss74814334	rs2242609	All Except Skin and Sex Cancer	Diagnosed 65 To 79	0.724	0.986266
ss74823044	rs11265582	All Except Skin and Sex Cancer	Diagnosed 65 To 79	0.727	0.986266
ss74823350	rs9904322	All Except Skin and Sex Cancer	Diagnosed 65 To 79	0.726	0.986266
ss74824971	rs10849051	All Except Skin and Sex Cancer	Diagnosed 65 To 79	0.726	0.986266
ss74829170	rs17520056	All Except Skin and Sex Cancer	Diagnosed 65 To 79	0.725	0.986266
ss74840431	rs10503901	All Except Skin and Sex Cancer	Diagnosed 65 To 79	0.727	0.986266
ss74831740	rs7971382	All Except Skin and Sex Cancer	Diagnosed 65 To 79	0.728	0.986848
ss74806105	rs999813	All Except Skin and Sex Cancer	Diagnosed 65 To 79	0.732	0.986854
ss74823877	rs9610695	All Except Skin and Sex Cancer	Diagnosed 65 To 79	0.73	0.986854
ss74825978	rs6714212	All Except Skin and Sex Cancer	Diagnosed 65 To 79	0.735	0.986854
ss74828243	rs11249978	All Except Skin and Sex Cancer	Diagnosed 65 To 79	0.735	0.986854
ss74830316	rs1549142	All Except Skin and Sex Cancer	Diagnosed 65 To 79	0.731	0.986854
ss74843362	rs639949	All Except Skin and Sex Cancer	Diagnosed 65 To 79	0.735	0.986854
ss74846216	rs10087629	All Except Skin and Sex Cancer	Diagnosed 65 To 79	0.732	0.986854
ss74850561	rs17516906	All Except Skin and Sex Cancer	Diagnosed 65 To 79	0.729	0.986854
ss74851215	rs612556	All Except Skin and Sex Cancer	Diagnosed 65 To 79	0.737	0.986855
ss74854318	rs4791049	All Except Skin and Sex Cancer	Diagnosed 65 To 79	0.737	0.986855
ss74818012	rs1386016	All Except Skin and Sex Cancer	Diagnosed 65 To 79	0.738	0.986855
ss74832924	rs9444584	All Except Skin and Sex Cancer	Diagnosed 65 To 79	0.738	0.986855
ss74825354	rs4757132	All Except Skin and Sex Cancer	Diagnosed 65 To 79	0.739	0.987238
ss74846770	rs7251786	All Except Skin and Sex Cancer	Diagnosed 65 To 79	0.741	0.987809
ss74843369	rs7629275	All Except Skin and Sex Cancer	Diagnosed 65 To 79	0.743	0.988379
ss74807428	rs13317	All Except Skin and Sex Cancer	Diagnosed 65 To 79	0.744	0.988567
ss74806364	rs3132453	All Except Skin and Sex Cancer	Diagnosed 65 To 79	0.757	0.988784
ss74809534	rs2075252	All Except Skin and Sex Cancer	Diagnosed 65 To 79	0.793	0.988784
ss74809567	rs560191	All Except Skin and Sex Cancer	Diagnosed 65 To 79	0.764	0.988784
ss74810218	rs3752448	All Except Skin and Sex Cancer	Diagnosed 65 To 79	0.818	0.988784
ss74810659	rs7549215	All Except Skin and Sex Cancer	Diagnosed 65 To 79	0.762	0.988784
ss74810907	rs689647	All Except Skin and Sex Cancer	Diagnosed 65 To 79	0.759	0.988784
ss74811078	rs9518825	All Except Skin and Sex Cancer	Diagnosed 65 To 79	0.77	0.988784
ss74811149	rs4370153	All Except Skin and Sex Cancer	Diagnosed 65 To 79	0.746	0.988784
ss74811270	rs3742318	All Except Skin and Sex Cancer	Diagnosed 65 To 79	0.766	0.988784
ss74812243	rs1571070	All Except Skin and Sex Cancer	Diagnosed 65 To 79	0.763	0.988784
ss74816881	rs13438232	All Except Skin and Sex Cancer	Diagnosed 65 To 79	0.795	0.988784
ss74818179	rs238775	All Except Skin and Sex Cancer	Diagnosed 65 To 79	0.834	0.988784
ss74818714	rs9853146	All Except Skin and Sex Cancer	Diagnosed 65 To 79	0.786	0.988784
ss74819057	rs4833772	All Except Skin and Sex Cancer	Diagnosed 65 To 79	0.781	0.988784
ss74819188	rs12419308	All Except Skin and Sex Cancer	Diagnosed 65 To 79	0.771	0.988784
ss74819252	rs9913923	All Except Skin and Sex Cancer	Diagnosed 65 To 79	0.833	0.988784
ss74820151	rs10972282	All Except Skin and Sex Cancer	Diagnosed 65 To 79	0.804	0.988784
ss74824011	rs17526942	All Except Skin and Sex Cancer	Diagnosed 65 To 79	0.764	0.988784
ss74824404	rs9586007	All Except Skin and Sex Cancer	Diagnosed 65 To 79	0.795	0.988784
ss74825055	rs4821605	All Except Skin and Sex Cancer	Diagnosed 65 To 79	0.754	0.988784
ss74825206	rs2026314	All Except Skin and Sex Cancer	Diagnosed 65 To 79	0.815	0.988784
ss74825360	rs10949835	All Except Skin and Sex Cancer	Diagnosed 65 To 79	0.806	0.988784
ss74825652	rs4870062	All Except Skin and Sex Cancer	Diagnosed 65 To 79	0.802	0.988784
ss74826162	rs4840467	All Except Skin and Sex Cancer	Diagnosed 65 To 79	0.827	0.988784
ss74826949	rs2640492	All Except Skin and Sex Cancer	Diagnosed 65 To 79	0.781	0.988784
ss74827106	rs8080613	All Except Skin and Sex Cancer	Diagnosed 65 To 79	0.791	0.988784
ss74827562	rs9371564	All Except Skin and Sex Cancer	Diagnosed 65 To 79	0.775	0.988784
ss74828781	rs10456443	All Except Skin and Sex Cancer	Diagnosed 65 To 79	0.792	0.988784
ss74829243	rs135551	All Except Skin and Sex Cancer	Diagnosed 65 To 79	0.766	0.988784
ss74830423	rs2501879	All Except Skin and Sex Cancer	Diagnosed 65 To 79	0.824	0.988784
ss74831178	rs3934729	All Except Skin and Sex Cancer	Diagnosed 65 To 79	0.747	0.988784
ss74831307	rs7833348	All Except Skin and Sex Cancer	Diagnosed 65 To 79	0.832	0.988784
ss74832317	rs2037128	All Except Skin and Sex Cancer	Diagnosed 65 To 79	0.766	0.988784
ss74832532	rs7000959	All Except Skin and Sex Cancer	Diagnosed 65 To 79	0.803	0.988784
ss74832778	rs2545025	All Except Skin and Sex Cancer	Diagnosed 65 To 79	0.752	0.988784
ss74833053	rs1008270	All Except Skin and Sex Cancer	Diagnosed 65 To 79	0.796	0.988784
ss74833626	rs830966	All Except Skin and Sex Cancer	Diagnosed 65 To 79	0.767	0.988784
ss74833876	rs12997281	All Except Skin and Sex Cancer	Diagnosed 65 To 79	0.75	0.988784
ss74834144	rs11107063	All Except Skin and Sex Cancer	Diagnosed 65 To 79	0.748	0.988784
ss74834978	rs17253937	All Except Skin and Sex Cancer	Diagnosed 65 To 79	0.808	0.988784
ss74835345	rs915179	All Except Skin and Sex Cancer	Diagnosed 65 To 79	0.777	0.988784
ss74836196	rs4773094	All Except Skin and Sex Cancer	Diagnosed 65 To 79	0.776	0.988784
ss74837665	rs2304579	All Except Skin and Sex Cancer	Diagnosed 65 To 79	0.766	0.988784
ss74838315	rs9474592	All Except Skin and Sex Cancer	Diagnosed 65 To 79	0.815	0.988784
ss74839801	rs10460157	All Except Skin and Sex Cancer	Diagnosed 65 To 79	0.782	0.988784
ss74840171	rs9480865	All Except Skin and Sex Cancer	Diagnosed 65 To 79	0.764	0.988784
ss74840849	rs4150355	All Except Skin and Sex Cancer	Diagnosed 65 To 79	0.816	0.988784
ss74841904	rs10842914	All Except Skin and Sex Cancer	Diagnosed 65 To 79	0.763	0.988784
ss74842339	rs1571779	All Except Skin and Sex Cancer	Diagnosed 65 To 79	0.814	0.988784
ss74843464	rs7567258	All Except Skin and Sex Cancer	Diagnosed 65 To 79	0.828	0.988784
ss74843617	rs10256914	All Except Skin and Sex Cancer	Diagnosed 65 To 79	0.772	0.988784
ss74845283	rs6872252	All Except Skin and Sex Cancer	Diagnosed 65 To 79	0.803	0.988784
ss74845428	rs12696596	All Except Skin and Sex Cancer	Diagnosed 65 To 79	0.76	0.988784
ss74845516	rs2249381	All Except Skin and Sex Cancer	Diagnosed 65 To 79	0.807	0.988784
ss74846045	rs9397486	All Except Skin and Sex Cancer	Diagnosed 65 To 79	0.834	0.988784
ss74847405	rs1802061	All Except Skin and Sex Cancer	Diagnosed 65 To 79	0.771	0.988784
ss74847599	rs4926252	All Except Skin and Sex Cancer	Diagnosed 65 To 79	0.786	0.988784
ss74848176	rs16959906	All Except Skin and Sex Cancer	Diagnosed 65 To 79	0.746	0.988784
ss74848314	rs12489218	All Except Skin and Sex Cancer	Diagnosed 65 To 79	0.746	0.988784
ss74849070	rs9457688	All Except Skin and Sex Cancer	Diagnosed 65 To 79	0.801	0.988784
ss74850232	rs2830036	All Except Skin and Sex Cancer	Diagnosed 65 To 79	0.821	0.988784
ss74851088	rs10111917	All Except Skin and Sex Cancer	Diagnosed 65 To 79	0.797	0.988784
ss74851203	rs12649180	All Except Skin and Sex Cancer	Diagnosed 65 To 79	0.791	0.988784
ss74852187	rs1044582	All Except Skin and Sex Cancer	Diagnosed 65 To 79	0.762	0.988784
ss74852745	rs11607961	All Except Skin and Sex Cancer	Diagnosed 65 To 79	0.776	0.988784
ss74853088	rs6438549	All Except Skin and Sex Cancer	Diagnosed 65 To 79	0.812	0.988784
ss74854082	rs2849377	All Except Skin and Sex Cancer	Diagnosed 65 To 79	0.803	0.988784
ss74854246	rs12545788	All Except Skin and Sex Cancer	Diagnosed 65 To 79	0.814	0.988784
ss74812407	rs2242665	All Except Skin and Sex Cancer	Diagnosed 65 To 79	0.838	0.990807
ss74808010	rs2291219	All Except Skin and Sex Cancer	Diagnosed 65 To 79	0.843	0.991111
ss74817691	rs2459	All Except Skin and Sex Cancer	Diagnosed 65 To 79	0.843	0.991111
ss74819184	rs10083536	All Except Skin and Sex Cancer	Diagnosed 65 To 79	0.846	0.991111
ss74832861	rs1286729	All Except Skin and Sex Cancer	Diagnosed 65 To 79	0.841	0.991111
ss74846170	rs40419	All Except Skin and Sex Cancer	Diagnosed 65 To 79	0.839	0.991111
ss74806161	rs2228529	All Except Skin and Sex Cancer	Diagnosed 65 To 79	0.864	0.991181
ss74807628	rs303061	All Except Skin and Sex Cancer	Diagnosed 65 To 79	0.867	0.991181
ss74807672	rs2071699	All Except Skin and Sex Cancer	Diagnosed 65 To 79	0.861	0.991181
ss74807782	rs6707475	All Except Skin and Sex Cancer	Diagnosed 65 To 79	0.865	0.991181
ss74809653	rs1799950	All Except Skin and Sex Cancer	Diagnosed 65 To 79	0.858	0.991181
ss74811307	rs3747965	All Except Skin and Sex Cancer	Diagnosed 65 To 79	0.868	0.991181
ss74812262	rs12421329	All Except Skin and Sex Cancer	Diagnosed 65 To 79	0.852	0.991181
ss74813062	rs6701295	All Except Skin and Sex Cancer	Diagnosed 65 To 79	0.859	0.991181
ss74814526	rs11074362	All Except Skin and Sex Cancer	Diagnosed 65 To 79	0.86	0.991181
ss74816143	rs10079250	All Except Skin and Sex Cancer	Diagnosed 65 To 79	0.858	0.991181
ss74823782	rs6504192	All Except Skin and Sex Cancer	Diagnosed 65 To 79	0.867	0.991181
ss74825650	rs7792045	All Except Skin and Sex Cancer	Diagnosed 65 To 79	0.854	0.991181
ss74847753	rs7838347	All Except Skin and Sex Cancer	Diagnosed 65 To 79	0.85	0.991181
ss74851074	rs12444804	All Except Skin and Sex Cancer	Diagnosed 65 To 79	0.865	0.991181
ss74806983	rs3130062	All Except Skin and Sex Cancer	Diagnosed 65 To 79	0.874	0.99123
ss74807348	rs1048945	All Except Skin and Sex Cancer	Diagnosed 65 To 79	0.884	0.99123
ss74808001	rs2286007	All Except Skin and Sex Cancer	Diagnosed 65 To 79	0.893	0.99123
ss74812475	rs11466111	All Except Skin and Sex Cancer	Diagnosed 65 To 79	0.876	0.99123
ss74812649	rs515192	All Except Skin and Sex Cancer	Diagnosed 65 To 79	0.888	0.99123
ss74812768	rs4667591	All Except Skin and Sex Cancer	Diagnosed 65 To 79	0.892	0.99123
ss74814414	rs17242648	All Except Skin and Sex Cancer	Diagnosed 65 To 79	0.881	0.99123
ss74818017	rs3755447	All Except Skin and Sex Cancer	Diagnosed 65 To 79	0.89	0.99123
ss74822136	rs2284445	All Except Skin and Sex Cancer	Diagnosed 65 To 79	0.871	0.99123
ss74825453	rs1805382	All Except Skin and Sex Cancer	Diagnosed 65 To 79	0.877	0.99123
ss74826102	rs3813826	All Except Skin and Sex Cancer	Diagnosed 65 To 79	0.884	0.99123
ss74832605	rs2239622	All Except Skin and Sex Cancer	Diagnosed 65 To 79	0.872	0.99123
ss74833358	rs876430	All Except Skin and Sex Cancer	Diagnosed 65 To 79	0.893	0.99123
ss74833652	rs1016547	All Except Skin and Sex Cancer	Diagnosed 65 To 79	0.873	0.99123
ss74836503	rs9463851	All Except Skin and Sex Cancer	Diagnosed 65 To 79	0.87	0.99123
ss74837087	rs2041646	All Except Skin and Sex Cancer	Diagnosed 65 To 79	0.891	0.99123
ss74837760	rs11722069	All Except Skin and Sex Cancer	Diagnosed 65 To 79	0.881	0.99123
ss74838711	rs7832999	All Except Skin and Sex Cancer	Diagnosed 65 To 79	0.871	0.99123
ss74839489	rs13233298	All Except Skin and Sex Cancer	Diagnosed 65 To 79	0.875	0.99123
ss74841509	rs1986601	All Except Skin and Sex Cancer	Diagnosed 65 To 79	0.892	0.99123
ss74842556	rs4790907	All Except Skin and Sex Cancer	Diagnosed 65 To 79	0.869	0.99123
ss74843769	rs2978073	All Except Skin and Sex Cancer	Diagnosed 65 To 79	0.877	0.99123
ss74843912	rs11843936	All Except Skin and Sex Cancer	Diagnosed 65 To 79	0.894	0.99123
ss74844493	rs11719667	All Except Skin and Sex Cancer	Diagnosed 65 To 79	0.89	0.99123
ss74846841	rs12236532	All Except Skin and Sex Cancer	Diagnosed 65 To 79	0.872	0.99123
ss74850690	rs7396243	All Except Skin and Sex Cancer	Diagnosed 65 To 79	0.878	0.99123
ss74850908	rs3217992	All Except Skin and Sex Cancer	Diagnosed 65 To 79	0.878	0.99123
ss74852683	rs2967646	All Except Skin and Sex Cancer	Diagnosed 65 To 79	0.878	0.99123
ss74826117	rs13313403	All Except Skin and Sex Cancer	Diagnosed 65 To 79	0.897	0.991852
ss74839118	rs17791147	All Except Skin and Sex Cancer	Diagnosed 65 To 79	0.896	0.991852
ss74824051	rs6003911	All Except Skin and Sex Cancer	Diagnosed 65 To 79	0.898	0.992005
ss74831538	rs9369421	All Except Skin and Sex Cancer	Diagnosed 65 To 79	0.9	0.992153
ss74828537	rs6778964	All Except Skin and Sex Cancer	Diagnosed 65 To 79	0.901	0.992306
ss74805923	rs707555	All Except Skin and Sex Cancer	Diagnosed 65 To 79	0.903	0.992425
ss74823140	rs11757832	All Except Skin and Sex Cancer	Diagnosed 65 To 79	0.903	0.992425
ss74824156	rs860416	All Except Skin and Sex Cancer	Diagnosed 65 To 79	0.906	0.992425
ss74832167	rs2551941	All Except Skin and Sex Cancer	Diagnosed 65 To 79	0.907	0.992425
ss74848475	rs6877893	All Except Skin and Sex Cancer	Diagnosed 65 To 79	0.905	0.992425
ss74854311	rs2299939	All Except Skin and Sex Cancer	Diagnosed 65 To 79	0.908	0.992425
ss74822438	rs12905386	All Except Skin and Sex Cancer	Diagnosed 65 To 79	0.909	0.992576
ss74817431	rs6927536	All Except Skin and Sex Cancer	Diagnosed 65 To 79	0.91	0.993191
ss74812215	rs5641	All Except Skin and Sex Cancer	Diagnosed 65 To 79	0.914	0.993797
ss74831156	rs11022765	All Except Skin and Sex Cancer	Diagnosed 65 To 79	0.912	0.993797
ss74837472	rs9480866	All Except Skin and Sex Cancer	Diagnosed 65 To 79	0.914	0.993797
ss74846507	rs6714520	All Except Skin and Sex Cancer	Diagnosed 65 To 79	0.913	0.993797
ss74831877	rs1024748	All Except Skin and Sex Cancer	Diagnosed 65 To 79	0.917	0.994868
ss74806931	rs11569017	All Except Skin and Sex Cancer	Diagnosed 65 To 79	0.918	0.995046
ss74807826	rs3736265	All Except Skin and Sex Cancer	Diagnosed 65 To 79	0.927	0.995046
ss74807867	rs3809482	All Except Skin and Sex Cancer	Diagnosed 65 To 79	0.92	0.995046
ss74809633	rs10503929	All Except Skin and Sex Cancer	Diagnosed 65 To 79	0.919	0.995046
ss74811692	rs854524	All Except Skin and Sex Cancer	Diagnosed 65 To 79	0.925	0.995046
ss74823034	rs174589	All Except Skin and Sex Cancer	Diagnosed 65 To 79	0.922	0.995046
ss74823109	rs1213371	All Except Skin and Sex Cancer	Diagnosed 65 To 79	0.923	0.995046
ss74824648	rs899653	All Except Skin and Sex Cancer	Diagnosed 65 To 79	0.921	0.995046
ss74826058	rs17029657	All Except Skin and Sex Cancer	Diagnosed 65 To 79	0.92	0.995046
ss74829852	rs2892547	All Except Skin and Sex Cancer	Diagnosed 65 To 79	0.932	0.995046
ss74830671	rs10229457	All Except Skin and Sex Cancer	Diagnosed 65 To 79	0.919	0.995046
ss74846724	rs2274760	All Except Skin and Sex Cancer	Diagnosed 65 To 79	0.931	0.995046
ss74854045	rs4792890	All Except Skin and Sex Cancer	Diagnosed 65 To 79	0.922	0.995046
ss74806360	rs644827	All Except Skin and Sex Cancer	Diagnosed 65 To 79	0.941	0.995092
ss74806929	rs2270565	All Except Skin and Sex Cancer	Diagnosed 65 To 79	0.942	0.995092
ss74811304	rs9536314	All Except Skin and Sex Cancer	Diagnosed 65 To 79	0.944	0.995092
ss74819408	rs2227955	All Except Skin and Sex Cancer	Diagnosed 65 To 79	0.939	0.995092
ss74826258	rs1843637	All Except Skin and Sex Cancer	Diagnosed 65 To 79	0.943	0.995092
ss74826971	rs736170	All Except Skin and Sex Cancer	Diagnosed 65 To 79	0.937	0.995092
ss74827374	rs12429603	All Except Skin and Sex Cancer	Diagnosed 65 To 79	0.939	0.995092
ss74829918	rs1997703	All Except Skin and Sex Cancer	Diagnosed 65 To 79	0.935	0.995092
ss74832355	rs1635404	All Except Skin and Sex Cancer	Diagnosed 65 To 79	0.946	0.995092
ss74833449	rs6458895	All Except Skin and Sex Cancer	Diagnosed 65 To 79	0.945	0.995092
ss74834853	rs12526712	All Except Skin and Sex Cancer	Diagnosed 65 To 79	0.944	0.995092
ss74835580	rs4433149	All Except Skin and Sex Cancer	Diagnosed 65 To 79	0.944	0.995092
ss74837209	rs4681067	All Except Skin and Sex Cancer	Diagnosed 65 To 79	0.944	0.995092
ss74841829	rs2881766	All Except Skin and Sex Cancer	Diagnosed 65 To 79	0.944	0.995092
ss74843346	rs16960110	All Except Skin and Sex Cancer	Diagnosed 65 To 79	0.939	0.995092
ss74845258	rs9515118	All Except Skin and Sex Cancer	Diagnosed 65 To 79	0.942	0.995092
ss74847242	rs6601431	All Except Skin and Sex Cancer	Diagnosed 65 To 79	0.946	0.995092
ss74849730	rs2914567	All Except Skin and Sex Cancer	Diagnosed 65 To 79	0.936	0.995092
ss74811775	rs2070661	All Except Skin and Sex Cancer	Diagnosed 65 To 79	0.951	0.995353
ss74822125	rs11780592	All Except Skin and Sex Cancer	Diagnosed 65 To 79	0.95	0.995353
ss74837711	rs7035298	All Except Skin and Sex Cancer	Diagnosed 65 To 79	0.951	0.995353
ss74809017	rs3194051	All Except Skin and Sex Cancer	Diagnosed 65 To 79	0.958	0.995436
ss74823810	rs4542691	All Except Skin and Sex Cancer	Diagnosed 65 To 79	0.954	0.995436
ss74831198	rs11722918	All Except Skin and Sex Cancer	Diagnosed 65 To 79	0.954	0.995436
ss74838978	rs7146340	All Except Skin and Sex Cancer	Diagnosed 65 To 79	0.954	0.995436
ss74843919	rs6095962	All Except Skin and Sex Cancer	Diagnosed 65 To 79	0.963	0.995551
ss74814234	rs1801516	All Except Skin and Sex Cancer	Diagnosed 65 To 79	0.967	0.997002
ss74837015	rs6964272	All Except Skin and Sex Cancer	Diagnosed 65 To 79	0.967	0.997002
ss74826423	rs6799331	All Except Skin and Sex Cancer	Diagnosed 65 To 79	0.968	0.997141
ss74848630	rs10804876	All Except Skin and Sex Cancer	Diagnosed 65 To 79	0.968	0.997141
ss74809911	rs2230009	All Except Skin and Sex Cancer	Diagnosed 65 To 79	0.969	0.997428
ss74829762	rs2378510	All Except Skin and Sex Cancer	Diagnosed 65 To 79	0.969	0.997428
ss74841724	rs4733220	All Except Skin and Sex Cancer	Diagnosed 65 To 79	0.969	0.997428
ss74826346	rs12734877	All Except Skin and Sex Cancer	Diagnosed 65 To 79	0.97	0.997566
ss74831473	rs2857597	All Except Skin and Sex Cancer	Diagnosed 65 To 79	0.97	0.997566
ss74806433	rs2061690	All Except Skin and Sex Cancer	Diagnosed 65 To 79	0.973	0.997819
ss74825747	rs135711	All Except Skin and Sex Cancer	Diagnosed 65 To 79	0.973	0.997819
ss74825880	rs4258837	All Except Skin and Sex Cancer	Diagnosed 65 To 79	0.971	0.997819
ss74829376	rs10110519	All Except Skin and Sex Cancer	Diagnosed 65 To 79	0.973	0.997819
ss74830473	rs6577059	All Except Skin and Sex Cancer	Diagnosed 65 To 79	0.974	0.997819
ss74836020	rs2071023	All Except Skin and Sex Cancer	Diagnosed 65 To 79	0.973	0.997819
ss74851268	rs13380176	All Except Skin and Sex Cancer	Diagnosed 65 To 79	0.974	0.997819
ss74807048	rs5996633	All Except Skin and Sex Cancer	Diagnosed 65 To 79	0.976	0.998093
ss74823867	rs2170082	All Except Skin and Sex Cancer	Diagnosed 65 To 79	0.976	0.998093
ss74806557	rs2228171	All Except Skin and Sex Cancer	Diagnosed 65 To 79	0.99	0.998221
ss74808745	rs4915691	All Except Skin and Sex Cancer	Diagnosed 65 To 79	0.983	0.998221
ss74820757	rs11656253	All Except Skin and Sex Cancer	Diagnosed 65 To 79	0.989	0.998221
ss74826856	rs4790830	All Except Skin and Sex Cancer	Diagnosed 65 To 79	0.987	0.998221
ss74827661	rs7276092	All Except Skin and Sex Cancer	Diagnosed 65 To 79	0.98	0.998221
ss74832507	rs17179419	All Except Skin and Sex Cancer	Diagnosed 65 To 79	0.979	0.998221
ss74833103	rs7296285	All Except Skin and Sex Cancer	Diagnosed 65 To 79	0.984	0.998221
ss74834308	rs17792118	All Except Skin and Sex Cancer	Diagnosed 65 To 79	0.99	0.998221
ss74838730	rs2211771	All Except Skin and Sex Cancer	Diagnosed 65 To 79	0.98	0.998221
ss74844579	rs13124637	All Except Skin and Sex Cancer	Diagnosed 65 To 79	0.989	0.998221
ss74808053	rs1760897	All Except Skin and Sex Cancer	Diagnosed 65 To 79	0.992	0.998355
ss74809229	rs9527025	All Except Skin and Sex Cancer	Diagnosed 65 To 79	0.997	0.999458
ss74836341	rs11766515	All Except Skin and Sex Cancer	Diagnosed 65 To 79	1	1
ss74829307	rs12703107	All Except Skin and Sex Cancer	Diagnosed > 80	0.00228	0.370483
ss74836676	rs2292979	All Except Skin and Sex Cancer	Diagnosed > 80	0.00258	0.370483
ss74843192	rs10117822	All Except Skin and Sex Cancer	Diagnosed > 80	0.00264	0.370483
ss74824337	rs788754	All Except Skin and Sex Cancer	Diagnosed > 80	0.00309	0.396844
ss74840431	rs10503901	All Except Skin and Sex Cancer	Diagnosed > 80	0.00339	0.397147
ss74814782	rs1864750	All Except Skin and Sex Cancer	Diagnosed > 80	0.00488	0.421632
ss74839138	rs4841283	All Except Skin and Sex Cancer	Diagnosed > 80	0.00537	0.447198
ss74854246	rs12545788	All Except Skin and Sex Cancer	Diagnosed > 80	0.00602	0.462336
ss74831740	rs7971382	All Except Skin and Sex Cancer	Diagnosed > 80	0.00736	0.490423
ss74832317	rs2037128	All Except Skin and Sex Cancer	Diagnosed > 80	0.00745	0.490423
ss74807989	rs669	All Except Skin and Sex Cancer	Diagnosed > 80	0.00777	0.49526
ss74843932	rs2287497	All Except Skin and Sex Cancer	Diagnosed > 80	0.00817	0.49526
ss74836196	rs4773094	All Except Skin and Sex Cancer	Diagnosed > 80	0.00849	0.496512
ss74809099	rs4253211	All Except Skin and Sex Cancer	Diagnosed > 80	0.00997	0.526051
ss74815391	rs743314	All Except Skin and Sex Cancer	Diagnosed > 80	0.0124	0.542461
ss74807967	rs1494555	All Except Skin and Sex Cancer	Diagnosed > 80	0.0147	0.591316
ss74817431	rs6927536	All Except Skin and Sex Cancer	Diagnosed > 80	0.0154	0.598004
ss74840122	rs738470	All Except Skin and Sex Cancer	Diagnosed > 80	0.0154	0.598004
ss74834675	rs10503927	All Except Skin and Sex Cancer	Diagnosed > 80	0.0159	0.607187
ss74811932	rs7220988	All Except Skin and Sex Cancer	Diagnosed > 80	0.0163	0.609445
ss74848808	rs13228494	All Except Skin and Sex Cancer	Diagnosed > 80	0.0195	0.67392
ss74845389	rs17636471	All Except Skin and Sex Cancer	Diagnosed > 80	0.0211	0.687985
ss74814414	rs17242648	All Except Skin and Sex Cancer	Diagnosed > 80	0.0263	0.73474
ss74833309	rs7997595	All Except Skin and Sex Cancer	Diagnosed > 80	0.0267	0.73474
ss74837250	rs4986589	All Except Skin and Sex Cancer	Diagnosed > 80	0.0255	0.73474
ss74839807	rs4469064	All Except Skin and Sex Cancer	Diagnosed > 80	0.0254	0.73474
ss74814609	rs1794108	All Except Skin and Sex Cancer	Diagnosed > 80	0.0285	0.737624
ss74823026	rs12987817	All Except Skin and Sex Cancer	Diagnosed > 80	0.0281	0.737624
ss74823877	rs9610695	All Except Skin and Sex Cancer	Diagnosed > 80	0.0281	0.737624
ss74836654	rs17447091	All Except Skin and Sex Cancer	Diagnosed > 80	0.0286	0.737624
ss74806316	rs12717	All Except Skin and Sex Cancer	Diagnosed > 80	0.0298	0.743601
ss74835005	rs12451026	All Except Skin and Sex Cancer	Diagnosed > 80	0.0325	0.779874
ss74813579	rs10282312	All Except Skin and Sex Cancer	Diagnosed > 80	0.0382	0.795296
ss74811692	rs854524	All Except Skin and Sex Cancer	Diagnosed > 80	0.0384	0.796743
ss74810722	rs1494558	All Except Skin and Sex Cancer	Diagnosed > 80	0.045	0.797266
ss74812215	rs5641	All Except Skin and Sex Cancer	Diagnosed > 80	0.0437	0.797266
ss74823034	rs174589	All Except Skin and Sex Cancer	Diagnosed > 80	0.0433	0.797266
ss74828961	rs2389557	All Except Skin and Sex Cancer	Diagnosed > 80	0.0425	0.797266
ss74837273	rs7982957	All Except Skin and Sex Cancer	Diagnosed > 80	0.0445	0.797266
ss74851088	rs10111917	All Except Skin and Sex Cancer	Diagnosed > 80	0.0401	0.797266
ss74818179	rs238775	All Except Skin and Sex Cancer	Diagnosed > 80	0.0476	0.804428
ss74838580	rs12727	All Except Skin and Sex Cancer	Diagnosed > 80	0.0474	0.804428
ss74813034	rs10471774	All Except Skin and Sex Cancer	Diagnosed > 80	0.0484	0.804485
ss74834126	rs17415614	All Except Skin and Sex Cancer	Diagnosed > 80	0.0482	0.804485
ss74825039	rs2240780	All Except Skin and Sex Cancer	Diagnosed > 80	0.0513	0.812436
ss74846770	rs7251786	All Except Skin and Sex Cancer	Diagnosed > 80	0.0535	0.81371
ss74815394	rs2286674	All Except Skin and Sex Cancer	Diagnosed > 80	0.0561	0.815558
ss74820151	rs10972282	All Except Skin and Sex Cancer	Diagnosed > 80	0.0542	0.815558
ss74828781	rs10456443	All Except Skin and Sex Cancer	Diagnosed > 80	0.0556	0.815558
ss74809470	rs1800067	All Except Skin and Sex Cancer	Diagnosed > 80	0.0576	0.815843
ss74835747	rs11155806	All Except Skin and Sex Cancer	Diagnosed > 80	0.0576	0.815843
ss74854483	rs7619370	All Except Skin and Sex Cancer	Diagnosed > 80	0.0573	0.815843
ss74831558	rs9397463	All Except Skin and Sex Cancer	Diagnosed > 80	0.0587	0.824393
ss74818825	rs4534095	All Except Skin and Sex Cancer	Diagnosed > 80	0.0601	0.827403
ss74820193	rs17082236	All Except Skin and Sex Cancer	Diagnosed > 80	0.0631	0.827403
ss74847061	rs13016051	All Except Skin and Sex Cancer	Diagnosed > 80	0.0647	0.827403
ss74850320	rs10498036	All Except Skin and Sex Cancer	Diagnosed > 80	0.0647	0.827403
ss74833626	rs830966	All Except Skin and Sex Cancer	Diagnosed > 80	0.0659	0.832467
ss74853256	rs1560333	All Except Skin and Sex Cancer	Diagnosed > 80	0.066	0.832467
ss74833227	rs3773747	All Except Skin and Sex Cancer	Diagnosed > 80	0.0697	0.83326
ss74845057	rs17057406	All Except Skin and Sex Cancer	Diagnosed > 80	0.0665	0.83326
ss74851051	rs12865518	All Except Skin and Sex Cancer	Diagnosed > 80	0.0684	0.83326
ss74843912	rs11843936	All Except Skin and Sex Cancer	Diagnosed > 80	0.0702	0.833471
ss74815976	rs17150554	All Except Skin and Sex Cancer	Diagnosed > 80	0.0752	0.846413
ss74845258	rs9515118	All Except Skin and Sex Cancer	Diagnosed > 80	0.0749	0.846413
ss74828825	rs2071575	All Except Skin and Sex Cancer	Diagnosed > 80	0.0762	0.847635
ss74818421	rs7074847	All Except Skin and Sex Cancer	Diagnosed > 80	0.0823	0.848896
ss74826421	rs3729573	All Except Skin and Sex Cancer	Diagnosed > 80	0.082	0.848896
ss74829722	rs10821841	All Except Skin and Sex Cancer	Diagnosed > 80	0.0795	0.848896
ss74838606	rs16959569	All Except Skin and Sex Cancer	Diagnosed > 80	0.0829	0.848896
ss74848920	rs11508026	All Except Skin and Sex Cancer	Diagnosed > 80	0.0808	0.848896
ss74853674	rs1181874	All Except Skin and Sex Cancer	Diagnosed > 80	0.082	0.848896
ss74825161	rs4550905	All Except Skin and Sex Cancer	Diagnosed > 80	0.0907	0.859739
ss74839118	rs17791147	All Except Skin and Sex Cancer	Diagnosed > 80	0.0908	0.859739
ss74845428	rs12696596	All Except Skin and Sex Cancer	Diagnosed > 80	0.0892	0.859739
ss74851590	rs11841502	All Except Skin and Sex Cancer	Diagnosed > 80	0.089	0.859739
ss74806138	rs11953798	All Except Skin and Sex Cancer	Diagnosed > 80	0.108	0.865774
ss74806659	rs3742769	All Except Skin and Sex Cancer	Diagnosed > 80	0.108	0.865774
ss74806711	rs248248	All Except Skin and Sex Cancer	Diagnosed > 80	0.113	0.865774
ss74807048	rs5996633	All Except Skin and Sex Cancer	Diagnosed > 80	0.116	0.865774
ss74807493	rs10853751	All Except Skin and Sex Cancer	Diagnosed > 80	0.0983	0.865774
ss74811149	rs4370153	All Except Skin and Sex Cancer	Diagnosed > 80	0.114	0.865774
ss74811272	rs766173	All Except Skin and Sex Cancer	Diagnosed > 80	0.119	0.865774
ss74812407	rs2242665	All Except Skin and Sex Cancer	Diagnosed > 80	0.122	0.865774
ss74814526	rs11074362	All Except Skin and Sex Cancer	Diagnosed > 80	0.121	0.865774
ss74814958	rs12050102	All Except Skin and Sex Cancer	Diagnosed > 80	0.109	0.865774
ss74822356	rs317913	All Except Skin and Sex Cancer	Diagnosed > 80	0.0943	0.865774
ss74822715	rs380713	All Except Skin and Sex Cancer	Diagnosed > 80	0.108	0.865774
ss74823044	rs11265582	All Except Skin and Sex Cancer	Diagnosed > 80	0.118	0.865774
ss74823058	rs1049562	All Except Skin and Sex Cancer	Diagnosed > 80	0.0999	0.865774
ss74825880	rs4258837	All Except Skin and Sex Cancer	Diagnosed > 80	0.117	0.865774
ss74826258	rs1843637	All Except Skin and Sex Cancer	Diagnosed > 80	0.1	0.865774
ss74831537	rs10152173	All Except Skin and Sex Cancer	Diagnosed > 80	0.0999	0.865774
ss74831779	rs3750749	All Except Skin and Sex Cancer	Diagnosed > 80	0.106	0.865774
ss74833449	rs6458895	All Except Skin and Sex Cancer	Diagnosed > 80	0.12	0.865774
ss74835310	rs11617752	All Except Skin and Sex Cancer	Diagnosed > 80	0.105	0.865774
ss74836451	rs12546017	All Except Skin and Sex Cancer	Diagnosed > 80	0.0995	0.865774
ss74837679	rs458358	All Except Skin and Sex Cancer	Diagnosed > 80	0.0966	0.865774
ss74838978	rs7146340	All Except Skin and Sex Cancer	Diagnosed > 80	0.114	0.865774
ss74841904	rs10842914	All Except Skin and Sex Cancer	Diagnosed > 80	0.0982	0.865774
ss74842864	rs2098684	All Except Skin and Sex Cancer	Diagnosed > 80	0.112	0.865774
ss74847242	rs6601431	All Except Skin and Sex Cancer	Diagnosed > 80	0.107	0.865774
ss74848475	rs6877893	All Except Skin and Sex Cancer	Diagnosed > 80	0.121	0.865774
ss74851337	rs11776228	All Except Skin and Sex Cancer	Diagnosed > 80	0.111	0.865774
ss74851751	rs7152131	All Except Skin and Sex Cancer	Diagnosed > 80	0.119	0.865774
ss74853780	rs710035	All Except Skin and Sex Cancer	Diagnosed > 80	0.0984	0.865774
ss74814474	rs10972281	All Except Skin and Sex Cancer	Diagnosed > 80	0.125	0.870042
ss74826686	rs4993000	All Except Skin and Sex Cancer	Diagnosed > 80	0.124	0.870042
ss74824896	rs1597568	All Except Skin and Sex Cancer	Diagnosed > 80	0.127	0.872588
ss74808881	rs3735781	All Except Skin and Sex Cancer	Diagnosed > 80	0.128	0.87511
ss74838357	rs3760627	All Except Skin and Sex Cancer	Diagnosed > 80	0.13	0.882672
ss74833652	rs1016547	All Except Skin and Sex Cancer	Diagnosed > 80	0.132	0.88581
ss74841481	rs3799698	All Except Skin and Sex Cancer	Diagnosed > 80	0.134	0.890585
ss74806364	rs3132453	All Except Skin and Sex Cancer	Diagnosed > 80	0.138	0.899596
ss74834383	rs2741339	All Except Skin and Sex Cancer	Diagnosed > 80	0.14	0.902687
ss74845312	rs9513116	All Except Skin and Sex Cancer	Diagnosed > 80	0.14	0.902687
ss74807128	rs2372536	All Except Skin and Sex Cancer	Diagnosed > 80	0.141	0.904074
ss74808855	rs764205	All Except Skin and Sex Cancer	Diagnosed > 80	0.141	0.904074
ss74813613	rs11953029	All Except Skin and Sex Cancer	Diagnosed > 80	0.143	0.904315
ss74828552	rs3824730	All Except Skin and Sex Cancer	Diagnosed > 80	0.144	0.907318
ss74831750	rs8138102	All Except Skin and Sex Cancer	Diagnosed > 80	0.144	0.907318
ss74829490	rs830557	All Except Skin and Sex Cancer	Diagnosed > 80	0.146	0.909146
ss74806360	rs644827	All Except Skin and Sex Cancer	Diagnosed > 80	0.152	0.910419
ss74823782	rs6504192	All Except Skin and Sex Cancer	Diagnosed > 80	0.148	0.910419
ss74846170	rs40419	All Except Skin and Sex Cancer	Diagnosed > 80	0.149	0.910419
ss74854045	rs4792890	All Except Skin and Sex Cancer	Diagnosed > 80	0.151	0.910419
ss74854328	rs719452	All Except Skin and Sex Cancer	Diagnosed > 80	0.147	0.910419
ss74807232	rs2727288	All Except Skin and Sex Cancer	Diagnosed > 80	0.158	0.912906
ss74808001	rs2286007	All Except Skin and Sex Cancer	Diagnosed > 80	0.161	0.912906
ss74808978	rs2217332	All Except Skin and Sex Cancer	Diagnosed > 80	0.159	0.912906
ss74809296	rs2237051	All Except Skin and Sex Cancer	Diagnosed > 80	0.161	0.912906
ss74824539	rs3764261	All Except Skin and Sex Cancer	Diagnosed > 80	0.154	0.912906
ss74831947	rs13074111	All Except Skin and Sex Cancer	Diagnosed > 80	0.161	0.912906
ss74834338	rs12214476	All Except Skin and Sex Cancer	Diagnosed > 80	0.156	0.912906
ss74841291	rs380417	All Except Skin and Sex Cancer	Diagnosed > 80	0.161	0.912906
ss74844317	rs17151147	All Except Skin and Sex Cancer	Diagnosed > 80	0.154	0.912906
ss74849325	rs10932196	All Except Skin and Sex Cancer	Diagnosed > 80	0.155	0.912906
ss74850629	rs2076399	All Except Skin and Sex Cancer	Diagnosed > 80	0.154	0.912906
ss74851350	rs6510949	All Except Skin and Sex Cancer	Diagnosed > 80	0.159	0.912906
ss74806904	rs2297792	All Except Skin and Sex Cancer	Diagnosed > 80	0.166	0.913897
ss74809285	rs1133657	All Except Skin and Sex Cancer	Diagnosed > 80	0.169	0.913897
ss74815370	rs11538263	All Except Skin and Sex Cancer	Diagnosed > 80	0.163	0.913897
ss74826010	rs6574115	All Except Skin and Sex Cancer	Diagnosed > 80	0.169	0.913897
ss74826314	rs10213251	All Except Skin and Sex Cancer	Diagnosed > 80	0.174	0.913897
ss74835345	rs915179	All Except Skin and Sex Cancer	Diagnosed > 80	0.168	0.913897
ss74836341	rs11766515	All Except Skin and Sex Cancer	Diagnosed > 80	0.172	0.913897
ss74839489	rs13233298	All Except Skin and Sex Cancer	Diagnosed > 80	0.173	0.913897
ss74842725	rs9466075	All Except Skin and Sex Cancer	Diagnosed > 80	0.164	0.913897
ss74845399	rs1475848	All Except Skin and Sex Cancer	Diagnosed > 80	0.169	0.913897
ss74846045	rs9397486	All Except Skin and Sex Cancer	Diagnosed > 80	0.172	0.913897
ss74854600	rs4687097	All Except Skin and Sex Cancer	Diagnosed > 80	0.168	0.913897
ss74806117	rs6461378	All Except Skin and Sex Cancer	Diagnosed > 80	0.177	0.914448
ss74808966	rs6091179	All Except Skin and Sex Cancer	Diagnosed > 80	0.179	0.914448
ss74820211	rs17084051	All Except Skin and Sex Cancer	Diagnosed > 80	0.175	0.914448
ss74822257	rs6682611	All Except Skin and Sex Cancer	Diagnosed > 80	0.176	0.914448
ss74826843	rs6259	All Except Skin and Sex Cancer	Diagnosed > 80	0.177	0.914448
ss74851290	rs2045709	All Except Skin and Sex Cancer	Diagnosed > 80	0.175	0.914448
ss74806787	rs7487683	All Except Skin and Sex Cancer	Diagnosed > 80	0.182	0.918907
ss74820980	rs662	All Except Skin and Sex Cancer	Diagnosed > 80	0.181	0.918907
ss74838123	rs4855094	All Except Skin and Sex Cancer	Diagnosed > 80	0.182	0.918907
ss74823140	rs11757832	All Except Skin and Sex Cancer	Diagnosed > 80	0.185	0.921268
ss74828999	rs4841304	All Except Skin and Sex Cancer	Diagnosed > 80	0.187	0.922587
ss74848338	rs13211987	All Except Skin and Sex Cancer	Diagnosed > 80	0.189	0.925845
ss74851252	rs11919783	All Except Skin and Sex Cancer	Diagnosed > 80	0.189	0.925845
ss74851822	rs12588378	All Except Skin and Sex Cancer	Diagnosed > 80	0.194	0.932495
ss74806983	rs3130062	All Except Skin and Sex Cancer	Diagnosed > 80	0.2	0.933323
ss74809162	rs3765148	All Except Skin and Sex Cancer	Diagnosed > 80	0.195	0.933323
ss74809625	rs7830743	All Except Skin and Sex Cancer	Diagnosed > 80	0.196	0.933323
ss74812168	rs2043289	All Except Skin and Sex Cancer	Diagnosed > 80	0.205	0.933323
ss74818012	rs1386016	All Except Skin and Sex Cancer	Diagnosed > 80	0.201	0.933323
ss74826037	rs3786680	All Except Skin and Sex Cancer	Diagnosed > 80	0.203	0.933323
ss74833358	rs876430	All Except Skin and Sex Cancer	Diagnosed > 80	0.203	0.933323
ss74836418	rs17725712	All Except Skin and Sex Cancer	Diagnosed > 80	0.197	0.933323
ss74838553	rs17320841	All Except Skin and Sex Cancer	Diagnosed > 80	0.198	0.933323
ss74839488	rs4839542	All Except Skin and Sex Cancer	Diagnosed > 80	0.196	0.933323
ss74854318	rs4791049	All Except Skin and Sex Cancer	Diagnosed > 80	0.197	0.933323
ss74810878	rs8178017	All Except Skin and Sex Cancer	Diagnosed > 80	0.21	0.936465
ss74808517	rs2584625	All Except Skin and Sex Cancer	Diagnosed > 80	0.216	0.937293
ss74811304	rs9536314	All Except Skin and Sex Cancer	Diagnosed > 80	0.219	0.937293
ss74813635	rs4986850	All Except Skin and Sex Cancer	Diagnosed > 80	0.218	0.937293
ss74831485	rs7465523	All Except Skin and Sex Cancer	Diagnosed > 80	0.211	0.937293
ss74832605	rs2239622	All Except Skin and Sex Cancer	Diagnosed > 80	0.217	0.937293
ss74853454	rs6816508	All Except Skin and Sex Cancer	Diagnosed > 80	0.218	0.937293
ss74826856	rs4790830	All Except Skin and Sex Cancer	Diagnosed > 80	0.222	0.942545
ss74814513	rs4988496	All Except Skin and Sex Cancer	Diagnosed > 80	0.225	0.943304
ss74837589	rs3742825	All Except Skin and Sex Cancer	Diagnosed > 80	0.225	0.943304
ss74841345	rs1884052	All Except Skin and Sex Cancer	Diagnosed > 80	0.224	0.943304
ss74841498	rs4792825	All Except Skin and Sex Cancer	Diagnosed > 80	0.225	0.943304
ss74812649	rs515192	All Except Skin and Sex Cancer	Diagnosed > 80	0.228	0.94424
ss74832559	rs1521191	All Except Skin and Sex Cancer	Diagnosed > 80	0.228	0.94424
ss74841724	rs4733220	All Except Skin and Sex Cancer	Diagnosed > 80	0.228	0.94424
ss74818017	rs3755447	All Except Skin and Sex Cancer	Diagnosed > 80	0.23	0.945723
ss74834264	rs2919384	All Except Skin and Sex Cancer	Diagnosed > 80	0.23	0.945723
ss74840681	rs214260	All Except Skin and Sex Cancer	Diagnosed > 80	0.23	0.945723
ss74808476	rs1801058	All Except Skin and Sex Cancer	Diagnosed > 80	0.236	0.94577
ss74810907	rs689647	All Except Skin and Sex Cancer	Diagnosed > 80	0.236	0.94577
ss74832221	rs294185	All Except Skin and Sex Cancer	Diagnosed > 80	0.232	0.94577
ss74839099	rs7731163	All Except Skin and Sex Cancer	Diagnosed > 80	0.239	0.94577
ss74846252	rs12538592	All Except Skin and Sex Cancer	Diagnosed > 80	0.237	0.94577
ss74853609	rs7962818	All Except Skin and Sex Cancer	Diagnosed > 80	0.234	0.94577
ss74808776	rs11229	All Except Skin and Sex Cancer	Diagnosed > 80	0.243	0.947865
ss74840607	rs4733119	All Except Skin and Sex Cancer	Diagnosed > 80	0.243	0.947865
ss74806557	rs2228171	All Except Skin and Sex Cancer	Diagnosed > 80	0.269	0.949793
ss74806931	rs11569017	All Except Skin and Sex Cancer	Diagnosed > 80	0.268	0.949793
ss74807018	rs3824433	All Except Skin and Sex Cancer	Diagnosed > 80	0.273	0.949793
ss74808010	rs2291219	All Except Skin and Sex Cancer	Diagnosed > 80	0.274	0.949793
ss74808099	rs7291444	All Except Skin and Sex Cancer	Diagnosed > 80	0.273	0.949793
ss74808914	rs799917	All Except Skin and Sex Cancer	Diagnosed > 80	0.265	0.949793
ss74809031	rs1801376	All Except Skin and Sex Cancer	Diagnosed > 80	0.253	0.949793
ss74811691	rs1805094	All Except Skin and Sex Cancer	Diagnosed > 80	0.261	0.949793
ss74811894	rs7645550	All Except Skin and Sex Cancer	Diagnosed > 80	0.263	0.949793
ss74815739	rs17763658	All Except Skin and Sex Cancer	Diagnosed > 80	0.269	0.949793
ss74823865	rs833068	All Except Skin and Sex Cancer	Diagnosed > 80	0.268	0.949793
ss74824404	rs9586007	All Except Skin and Sex Cancer	Diagnosed > 80	0.25	0.949793
ss74827287	rs6900496	All Except Skin and Sex Cancer	Diagnosed > 80	0.26	0.949793
ss74827301	rs3781207	All Except Skin and Sex Cancer	Diagnosed > 80	0.251	0.949793
ss74828130	rs1481120	All Except Skin and Sex Cancer	Diagnosed > 80	0.247	0.949793
ss74828237	rs8181047	All Except Skin and Sex Cancer	Diagnosed > 80	0.267	0.949793
ss74830853	rs6984111	All Except Skin and Sex Cancer	Diagnosed > 80	0.264	0.949793
ss74831307	rs7833348	All Except Skin and Sex Cancer	Diagnosed > 80	0.255	0.949793
ss74831833	rs1862263	All Except Skin and Sex Cancer	Diagnosed > 80	0.247	0.949793
ss74834336	rs4807942	All Except Skin and Sex Cancer	Diagnosed > 80	0.251	0.949793
ss74836250	rs2302535	All Except Skin and Sex Cancer	Diagnosed > 80	0.27	0.949793
ss74836584	rs300984	All Except Skin and Sex Cancer	Diagnosed > 80	0.247	0.949793
ss74841534	rs2975647	All Except Skin and Sex Cancer	Diagnosed > 80	0.253	0.949793
ss74843820	rs11802954	All Except Skin and Sex Cancer	Diagnosed > 80	0.264	0.949793
ss74844493	rs11719667	All Except Skin and Sex Cancer	Diagnosed > 80	0.27	0.949793
ss74845924	rs9397085	All Except Skin and Sex Cancer	Diagnosed > 80	0.266	0.949793
ss74850078	rs1399499	All Except Skin and Sex Cancer	Diagnosed > 80	0.271	0.949793
ss74809965	rs1800057	All Except Skin and Sex Cancer	Diagnosed > 80	0.275	0.950875
ss74843464	rs7567258	All Except Skin and Sex Cancer	Diagnosed > 80	0.275	0.950875
ss74834097	rs17159769	All Except Skin and Sex Cancer	Diagnosed > 80	0.276	0.951003
ss74836167	rs7711960	All Except Skin and Sex Cancer	Diagnosed > 80	0.276	0.951003
ss74807782	rs6707475	All Except Skin and Sex Cancer	Diagnosed > 80	0.288	0.951629
ss74808432	rs11568943	All Except Skin and Sex Cancer	Diagnosed > 80	0.278	0.951629
ss74809229	rs9527025	All Except Skin and Sex Cancer	Diagnosed > 80	0.288	0.951629
ss74810222	rs144848	All Except Skin and Sex Cancer	Diagnosed > 80	0.285	0.951629
ss74812308	rs10445337	All Except Skin and Sex Cancer	Diagnosed > 80	0.293	0.951629
ss74816143	rs10079250	All Except Skin and Sex Cancer	Diagnosed > 80	0.29	0.951629
ss74817110	rs3969860	All Except Skin and Sex Cancer	Diagnosed > 80	0.29	0.951629
ss74818366	rs7628878	All Except Skin and Sex Cancer	Diagnosed > 80	0.288	0.951629
ss74822550	rs13058338	All Except Skin and Sex Cancer	Diagnosed > 80	0.278	0.951629
ss74823240	rs464884	All Except Skin and Sex Cancer	Diagnosed > 80	0.294	0.951629
ss74823828	rs7288979	All Except Skin and Sex Cancer	Diagnosed > 80	0.29	0.951629
ss74825689	rs6092495	All Except Skin and Sex Cancer	Diagnosed > 80	0.28	0.951629
ss74825823	rs2111959	All Except Skin and Sex Cancer	Diagnosed > 80	0.29	0.951629
ss74826162	rs4840467	All Except Skin and Sex Cancer	Diagnosed > 80	0.298	0.951629
ss74829376	rs10110519	All Except Skin and Sex Cancer	Diagnosed > 80	0.281	0.951629
ss74830403	rs13207511	All Except Skin and Sex Cancer	Diagnosed > 80	0.297	0.951629
ss74834538	rs4784745	All Except Skin and Sex Cancer	Diagnosed > 80	0.279	0.951629
ss74839206	rs2923774	All Except Skin and Sex Cancer	Diagnosed > 80	0.292	0.951629
ss74839982	rs4771644	All Except Skin and Sex Cancer	Diagnosed > 80	0.288	0.951629
ss74840667	rs2013080	All Except Skin and Sex Cancer	Diagnosed > 80	0.298	0.951629
ss74848314	rs12489218	All Except Skin and Sex Cancer	Diagnosed > 80	0.29	0.951629
ss74852852	rs9526983	All Except Skin and Sex Cancer	Diagnosed > 80	0.291	0.951629
ss74806494	rs16942	All Except Skin and Sex Cancer	Diagnosed > 80	0.303	0.951806
ss74808228	rs2516489	All Except Skin and Sex Cancer	Diagnosed > 80	0.311	0.951806
[truncated: 4,915 more rows]

## Sheet: 2b.KMResultsForSNPsOfInterest
Supplementary Table 2b.Detailed Kaplan Meier Results for SNPs that demonstrated different age-dependent survival patterns
Columns C and D is the number of individuals that possessed wild type and variant genotypes, and the (#Obs) value in the same columns is the number of observed events for each genotype in the Kaplan Meier analysis
	SNP rs ID #	# Wild Type (#Obs)	# Variant (#Obs)	Log Rank P Value	Adjusted Log Rank (FDR)	5 year survival rate (%, 95% CI)
All Except Skin Cancer						Wild Type	Variant
Full Dataset	rs1794108	904 (476)	160 (160)	0	0	73.4 (70.5-76.5)	45.6 (38.5-54.1)
	rs4147918	891 (492)	188 (154)	2.01e-07	0.000154368	71.1 (68.1-74.2)	54.4 (47.6-62.1)
	rs11574358	1026 (594)	107 (106)	9.99e-16	3.45254e-12	70.1 (67.2-72.9)	40.1 (31.8-50.6)
	rs317913	848 (467)	256 (204)	4.02e-11	6.94656e-08	71.8 (68.8-74.9)	52.3 (46.5-58.8)
Aged 50-64	rs1794108	327 (121)	32 (32)	0.000554	0.19	87.0 (83.3-90.7)	78.1 (65.0-93.8)
	rs4147918	311 (55)	55 (32)	0.417	0.95	85.6 (81.7-89.7)	83.5 (74.2-94.0)
	rs11574358	348 (143)	30 (29)	5.69e-07	0.0003	87.1 (83.6-90.7)	60.0 (44.7-80.4)
	rs317913	300 (123)	72 (43)	0.0022	0.37	86.1 (82.3-90.2)	76.0 (66.7-86.7)
Aged 65-79	rs1794108	427 (235)	92 (92)	1.05e-13	2.4192e-10	73.4 (69.2-77.9)	40.2 (31.3-51.6)
	rs4147918	437 (249)	90 (81)	9.63e-09	9.50894e-06	70.6 (66.5-75.2)	45.6 (36.3-57.4)
	rs11574358	504 (307)	54 (54)	8.42e-11	1.16398e-07	68.3 (64.3-72.6)	37.1 (26.1-52.4)
	rs317913	411 (233)	130 (111)	1.1e-06	0.00069	71.1 (66.7-75.8)	48.7 (40.8-58.2)
Aged 80+	rs1794108	150 (120)	36 (36)	0.00805	0.49	44.6 (37.1-53.5)	25.0 (14.2-44.0)
	rs4147918	143 (115)	43 (41)	0.077	0.84	39.1 (31.9-48.6)	34.8 (23.1-52.5)
	rs11574358	174 (144)	23 (23)	0.09	0.85	39.7 (33.0-47.6)	21.7 (10.0-47.2)
	rs317913	137 (111)	54 (50)	0.284	0.95	41.3 (33.6-50.7)	29.6 (19.6-44.7)
All Except Skin And Sex Cancer
Full Data set	rs1794108	450 (287)	104 (104)	4.57e-06	0.002	55.3 (50.7-60.3)	37.5 (29.2-48.1)
	rs4147918	464 (310)	105 (94)	0.000751	0.216207	52.6 (48.1-57.8)	41.6 (33.1-52.3)
	rs11574358	533 (368)	72 (72)	7.09e-10	8.16768e-07	54.2 (50.2-58.6)	22.2 (14.4-34.2)
	rs317913	436 (289)	152 (134)	0.000554	0.19	54.5 (49.8-59.5)	37.7 (30.1-46.3)
Aged 50-64	rs1794108	123 (67)	21 (21)	0.264	0.94	69.6 (61.9-78.3)	66.7 (49.3-90.2)
	rs4147918	126 (75)	24 (19)	0.607	0.97	69.5 (61.9-78.1)	70.5 (54.4-91.5)
	rs11574358	139 (83)	15 (15)	4.71e-06	0.0025	73.9 (66.9-81.6)	33.3 (16.3-68.2)
	rs317913	116 (69)	37 (28)	0.454	0.96	70.7 (62.8-79.5)	63.9 (50.1-81.7)
Aged 65 To 79	rs1794108	224 (134)	63 (63)	1.96e-07	0.00015	56.8 (50.3-64.1)	31.7 (22.1-45.6)
	rs4147918	242 (154)	51 (47)	5.89e-05	0.02	53.1 (46.8-60.1)	28.4 (18.2-44.1)
	rs11574358	280 (188)	38 (38)	4.07e-05	0.018	51.8 (46.1-58.4)	23.6 (13.3-41.9)
	rs317913	224 (140)	80 (72)	0.00163	0.33	54.2 (47.8-61.6)	35.0 (25.9-47.2)
Aged 80+	rs1794108	103 (86)	20 (20)	0.0285	0.73	34.1 (25.8-45.0)	15.0 (5.2-42.6)
	rs4147918	96 (81)	30 (28)	0.767	0.98	27.8 (19.8-38.9)	25.6 (13.7-47.8)
	rs11574358	114 (97)	19 (19)	0.488	0.966	30.5 (22.9-40.7)	15.7 (5.5-44.6)
	rs317913	96 (80)	35 (34)	0.09	0.86	33.5 (19.1-38.3)	17.1 (8.2-35.5)

## Sheet: 2c.GeneAnalysis
Supplementary Table 2c. Full Kaplan Meier output (Gene Analysis)
Entrez Gene ID	Cancer Category	Age Category	Log Rank P Value	Adjusted Log Rank (FDR)	Significant SNPs after FDR (marked with *)
5599	All Except Skin and Sex	Diagnosed 50 To 64	1.65e-05	0.0063855	*
2879	All Except Skin Cancer	Diagnosed 65 To 79	4.21e-05	0.0130342	*
23410	All Except Skin and Sex	Diagnosed 65 To 79	3.97e-07	0.000204852	*
23410	All Except Skin Cancer	Diagnosed 65 To 79	5.74e-09	8.88552e-06	*
2879	All Except Skin Cancer	Diagnosed >50	0.000207	0.0457766	*
23410	All Except Skin Cancer	Diagnosed >50	3.54e-07	0.000204852	*
10229	All Except Skin Cancer	Diagnosed >50	0.000197	0.0457766	*
5599	All Except Skin Cancer	Diagnosed 50 To 64	0.000804	0.138288
5291	All Except Skin Cancer	Diagnosed 50 To 64	0.0106	0.582776
1029	All Except Skin Cancer	Diagnosed 50 To 64	0.0252	0.731297
6561	All Except Skin Cancer	Diagnosed 50 To 64	0.0258	0.731297
4001	All Except Skin Cancer	Diagnosed 50 To 64	0.0963	0.903453
3717	All Except Skin Cancer	Diagnosed 50 To 64	0.115	0.903617
1022	All Except Skin Cancer	Diagnosed 50 To 64	0.17	0.930404
26959	All Except Skin Cancer	Diagnosed 50 To 64	0.226	0.930404
578	All Except Skin Cancer	Diagnosed 50 To 64	0.194	0.930404
890	All Except Skin Cancer	Diagnosed 50 To 64	0.177	0.930404
348	All Except Skin Cancer	Diagnosed 50 To 64	0.287	0.949693
2071	All Except Skin Cancer	Diagnosed 50 To 64	0.49	0.973895
2936	All Except Skin Cancer	Diagnosed 50 To 64	0.377	0.973895
4846	All Except Skin Cancer	Diagnosed 50 To 64	0.441	0.973895
5970	All Except Skin Cancer	Diagnosed 50 To 64	0.449	0.973895
7012	All Except Skin Cancer	Diagnosed 50 To 64	0.485	0.973895
7150	All Except Skin Cancer	Diagnosed 50 To 64	0.404	0.973895
7422	All Except Skin Cancer	Diagnosed 50 To 64	0.477	0.973895
10210	All Except Skin Cancer	Diagnosed 50 To 64	0.637	0.975515
2237	All Except Skin Cancer	Diagnosed 50 To 64	0.592	0.975515
2	All Except Skin Cancer	Diagnosed 50 To 64	0.608	0.975515
5156	All Except Skin Cancer	Diagnosed 50 To 64	0.553	0.975515
5468	All Except Skin Cancer	Diagnosed 50 To 64	0.55	0.975515
5979	All Except Skin Cancer	Diagnosed 50 To 64	0.585	0.975515
6929	All Except Skin Cancer	Diagnosed 50 To 64	0.539	0.975515
701	All Except Skin Cancer	Diagnosed 50 To 64	0.625	0.975515
8480	All Except Skin Cancer	Diagnosed 50 To 64	0.634	0.975515
4217	All Except Skin Cancer	Diagnosed 50 To 64	0.815	0.989666
7314	All Except Skin Cancer	Diagnosed 50 To 64	0.793	0.989666
1387	All Except Skin Cancer	Diagnosed 50 To 64	0.891	0.995444
2353	All Except Skin Cancer	Diagnosed 50 To 64	0.927	0.995444
2879	All Except Skin Cancer	Diagnosed 50 To 64	0.941	0.995444
3184	All Except Skin Cancer	Diagnosed 50 To 64	0.933	0.995444
3738	All Except Skin Cancer	Diagnosed 50 To 64	0.959	0.996473
10683	All Except Skin Cancer	Diagnosed 50 To 64	0.986	0.998026
9521	All Except Skin Cancer	Diagnosed 50 To 64	0.985	0.998026
111	All Except Skin and Sex	Diagnosed 50 To 64	0.0122	0.582776
1029	All Except Skin and Sex	Diagnosed 50 To 64	0.0335	0.785727
2033	All Except Skin and Sex	Diagnosed 50 To 64	0.0489	0.806878
26291	All Except Skin and Sex	Diagnosed 50 To 64	0.0582	0.806878
5663	All Except Skin and Sex	Diagnosed 50 To 64	0.0493	0.806878
7351	All Except Skin and Sex	Diagnosed 50 To 64	0.0457	0.806878
5893	All Except Skin and Sex	Diagnosed 50 To 64	0.0715	0.828296
9612	All Except Skin and Sex	Diagnosed 50 To 64	0.0706	0.828296
890	All Except Skin and Sex	Diagnosed 50 To 64	0.0754	0.853071
5444	All Except Skin and Sex	Diagnosed 50 To 64	0.0872	0.895629
27429	All Except Skin and Sex	Diagnosed 50 To 64	0.0962	0.903453
5069	All Except Skin and Sex	Diagnosed 50 To 64	0.0998	0.903453
5979	All Except Skin and Sex	Diagnosed 50 To 64	0.0974	0.903453
5580	All Except Skin and Sex	Diagnosed 50 To 64	0.12	0.903617
5291	All Except Skin and Sex	Diagnosed 50 To 64	0.117	0.903617
578	All Except Skin and Sex	Diagnosed 50 To 64	0.103	0.903617
1268	All Except Skin and Sex	Diagnosed 50 To 64	0.129	0.92024
1432	All Except Skin and Sex	Diagnosed 50 To 64	0.225	0.930404
1950	All Except Skin and Sex	Diagnosed 50 To 64	0.219	0.930404
1956	All Except Skin and Sex	Diagnosed 50 To 64	0.177	0.930404
2335	All Except Skin and Sex	Diagnosed 50 To 64	0.184	0.930404
2950	All Except Skin and Sex	Diagnosed 50 To 64	0.158	0.930404
3303	All Except Skin and Sex	Diagnosed 50 To 64	0.2	0.930404
355	All Except Skin and Sex	Diagnosed 50 To 64	0.183	0.930404
4482	All Except Skin and Sex	Diagnosed 50 To 64	0.201	0.930404
5578	All Except Skin and Sex	Diagnosed 50 To 64	0.178	0.930404
5626	All Except Skin and Sex	Diagnosed 50 To 64	0.218	0.930404
56648	All Except Skin and Sex	Diagnosed 50 To 64	0.176	0.930404
5747	All Except Skin and Sex	Diagnosed 50 To 64	0.229	0.930404
7020	All Except Skin and Sex	Diagnosed 50 To 64	0.193	0.930404
7352	All Except Skin and Sex	Diagnosed 50 To 64	0.135	0.930404
857	All Except Skin and Sex	Diagnosed 50 To 64	0.146	0.930404
8660	All Except Skin and Sex	Diagnosed 50 To 64	0.204	0.930404
1022	All Except Skin and Sex	Diagnosed 50 To 64	0.166	0.930404
26959	All Except Skin and Sex	Diagnosed 50 To 64	0.218	0.930404
2879	All Except Skin and Sex	Diagnosed 50 To 64	0.173	0.930404
4217	All Except Skin and Sex	Diagnosed 50 To 64	0.163	0.930404
5156	All Except Skin and Sex	Diagnosed 50 To 64	0.168	0.930404
5371	All Except Skin and Sex	Diagnosed 50 To 64	0.232	0.930404
8480	All Except Skin and Sex	Diagnosed 50 To 64	0.186	0.930404
5449	All Except Skin and Sex	Diagnosed 50 To 64	0.236	0.931959
3953	All Except Skin and Sex	Diagnosed 50 To 64	0.251	0.933887
6929	All Except Skin and Sex	Diagnosed 50 To 64	0.244	0.933887
10891	All Except Skin and Sex	Diagnosed 50 To 64	0.289	0.949693
4790	All Except Skin and Sex	Diagnosed 50 To 64	0.286	0.949693
5468	All Except Skin and Sex	Diagnosed 50 To 64	0.293	0.949693
2074	All Except Skin and Sex	Diagnosed 50 To 64	0.317	0.955149
3727	All Except Skin and Sex	Diagnosed 50 To 64	0.309	0.955149
2941	All Except Skin and Sex	Diagnosed 50 To 64	0.343	0.969231
2185	All Except Skin and Sex	Diagnosed 50 To 64	0.451	0.973895
2321	All Except Skin and Sex	Diagnosed 50 To 64	0.504	0.973895
2729	All Except Skin and Sex	Diagnosed 50 To 64	0.508	0.973895
3221	All Except Skin and Sex	Diagnosed 50 To 64	0.442	0.973895
4000	All Except Skin and Sex	Diagnosed 50 To 64	0.401	0.973895
4792	All Except Skin and Sex	Diagnosed 50 To 64	0.492	0.973895
5465	All Except Skin and Sex	Diagnosed 50 To 64	0.415	0.973895
581	All Except Skin and Sex	Diagnosed 50 To 64	0.416	0.973895
6391	All Except Skin and Sex	Diagnosed 50 To 64	0.471	0.973895
10210	All Except Skin and Sex	Diagnosed 50 To 64	0.508	0.973895
2	All Except Skin and Sex	Diagnosed 50 To 64	0.491	0.973895
3184	All Except Skin and Sex	Diagnosed 50 To 64	0.382	0.973895
1387	All Except Skin and Sex	Diagnosed 50 To 64	0.516	0.974528
701	All Except Skin and Sex	Diagnosed 50 To 64	0.52	0.974528
1385	All Except Skin and Sex	Diagnosed 50 To 64	0.638	0.975515
142	All Except Skin and Sex	Diagnosed 50 To 64	0.56	0.975515
3480	All Except Skin and Sex	Diagnosed 50 To 64	0.574	0.975515
3575	All Except Skin and Sex	Diagnosed 50 To 64	0.555	0.975515
5290	All Except Skin and Sex	Diagnosed 50 To 64	0.627	0.975515
712	All Except Skin and Sex	Diagnosed 50 To 64	0.619	0.975515
2353	All Except Skin and Sex	Diagnosed 50 To 64	0.528	0.975515
3717	All Except Skin and Sex	Diagnosed 50 To 64	0.576	0.975515
4846	All Except Skin and Sex	Diagnosed 50 To 64	0.624	0.975515
6561	All Except Skin and Sex	Diagnosed 50 To 64	0.609	0.975515
2006	All Except Skin and Sex	Diagnosed 50 To 64	0.649	0.977288
2260	All Except Skin and Sex	Diagnosed 50 To 64	0.667	0.980547
23410	All Except Skin and Sex	Diagnosed 50 To 64	0.663	0.980547
3064	All Except Skin and Sex	Diagnosed 50 To 64	0.679	0.982902
9521	All Except Skin and Sex	Diagnosed 50 To 64	0.682	0.982902
10269	All Except Skin and Sex	Diagnosed 50 To 64	0.725	0.989666
1026	All Except Skin and Sex	Diagnosed 50 To 64	0.784	0.989666
1443	All Except Skin and Sex	Diagnosed 50 To 64	0.721	0.989666
2688	All Except Skin and Sex	Diagnosed 50 To 64	0.715	0.989666
2932	All Except Skin and Sex	Diagnosed 50 To 64	0.72	0.989666
3312	All Except Skin and Sex	Diagnosed 50 To 64	0.77	0.989666
4036	All Except Skin and Sex	Diagnosed 50 To 64	0.81	0.989666
4249	All Except Skin and Sex	Diagnosed 50 To 64	0.824	0.989666
4521	All Except Skin and Sex	Diagnosed 50 To 64	0.82	0.989666
4803	All Except Skin and Sex	Diagnosed 50 To 64	0.78	0.989666
5770	All Except Skin and Sex	Diagnosed 50 To 64	0.82	0.989666
641	All Except Skin and Sex	Diagnosed 50 To 64	0.797	0.989666
7155	All Except Skin and Sex	Diagnosed 50 To 64	0.736	0.989666
10683	All Except Skin and Sex	Diagnosed 50 To 64	0.77	0.989666
2237	All Except Skin and Sex	Diagnosed 50 To 64	0.755	0.989666
3738	All Except Skin and Sex	Diagnosed 50 To 64	0.764	0.989666
5970	All Except Skin and Sex	Diagnosed 50 To 64	0.773	0.989666
7345	All Except Skin and Sex	Diagnosed 50 To 64	0.836	0.991761
3066	All Except Skin and Sex	Diagnosed 50 To 64	0.841	0.993792
2071	All Except Skin and Sex	Diagnosed 50 To 64	0.845	0.993967
1191	All Except Skin and Sex	Diagnosed 50 To 64	0.944	0.995444
539	All Except Skin and Sex	Diagnosed 50 To 64	0.942	0.995444
7295	All Except Skin and Sex	Diagnosed 50 To 64	0.857	0.995444
8074	All Except Skin and Sex	Diagnosed 50 To 64	0.925	0.995444
2202	All Except Skin and Sex	Diagnosed 50 To 64	0.85	0.995444
2690	All Except Skin and Sex	Diagnosed 50 To 64	0.934	0.995444
2936	All Except Skin and Sex	Diagnosed 50 To 64	0.883	0.995444
348	All Except Skin and Sex	Diagnosed 50 To 64	0.883	0.995444
7422	All Except Skin and Sex	Diagnosed 50 To 64	0.916	0.995444
5830	All Except Skin and Sex	Diagnosed 50 To 64	0.954	0.996473
9365	All Except Skin and Sex	Diagnosed 50 To 64	0.956	0.996473
6908	All Except Skin and Sex	Diagnosed 50 To 64	0.964	0.996842
596	All Except Skin and Sex	Diagnosed 50 To 64	0.988	0.998026
675	All Except Skin and Sex	Diagnosed 50 To 64	0.978	0.998026
7314	All Except Skin and Sex	Diagnosed 50 To 64	0.975	0.998026
7161	All Except Skin and Sex	Diagnosed 50 To 64	0.994	0.999813
ss74833053	All Except Skin and Sex	Diagnosed 50 To 64	0.0233	0.731297
ss74815976	All Except Skin and Sex	Diagnosed 50 To 64	0.0584	0.806878
ss74825747	All Except Skin and Sex	Diagnosed 50 To 64	0.0595	0.807947
ss74832556	All Except Skin and Sex	Diagnosed 50 To 64	0.0647	0.820948
ss74838838	All Except Skin and Sex	Diagnosed 50 To 64	0.0883	0.895629
ss74847061	All Except Skin and Sex	Diagnosed 50 To 64	0.0916	0.903453
ss74806117	All Except Skin and Sex	Diagnosed 50 To 64	0.221	0.930404
ss74806711	All Except Skin and Sex	Diagnosed 50 To 64	0.15	0.930404
ss74806929	All Except Skin and Sex	Diagnosed 50 To 64	0.2	0.930404
ss74809771	All Except Skin and Sex	Diagnosed 50 To 64	0.147	0.930404
ss74811414	All Except Skin and Sex	Diagnosed 50 To 64	0.152	0.930404
ss74823882	All Except Skin and Sex	Diagnosed 50 To 64	0.168	0.930404
ss74829652	All Except Skin and Sex	Diagnosed 50 To 64	0.171	0.930404
ss74839206	All Except Skin and Sex	Diagnosed 50 To 64	0.205	0.930404
ss74847950	All Except Skin and Sex	Diagnosed 50 To 64	0.156	0.930404
ss74849070	All Except Skin and Sex	Diagnosed 50 To 64	0.233	0.931959
ss74850629	All Except Skin and Sex	Diagnosed 50 To 64	0.259	0.934573
ss74851082	All Except Skin and Sex	Diagnosed 50 To 64	0.296	0.949693
ss74854111	All Except Skin and Sex	Diagnosed 50 To 64	0.285	0.949693
ss74824648	All Except Skin and Sex	Diagnosed 50 To 64	0.328	0.960226
ss74806227	All Except Skin and Sex	Diagnosed 50 To 64	0.387	0.973895
ss74807493	All Except Skin and Sex	Diagnosed 50 To 64	0.366	0.973895
ss74808010	All Except Skin and Sex	Diagnosed 50 To 64	0.367	0.973895
ss74808575	All Except Skin and Sex	Diagnosed 50 To 64	0.361	0.973895
ss74809470	All Except Skin and Sex	Diagnosed 50 To 64	0.509	0.973895
ss74816128	All Except Skin and Sex	Diagnosed 50 To 64	0.416	0.973895
ss74822134	All Except Skin and Sex	Diagnosed 50 To 64	0.491	0.973895
ss74823109	All Except Skin and Sex	Diagnosed 50 To 64	0.453	0.973895
ss74826099	All Except Skin and Sex	Diagnosed 50 To 64	0.508	0.973895
ss74828620	All Except Skin and Sex	Diagnosed 50 To 64	0.411	0.973895
ss74829722	All Except Skin and Sex	Diagnosed 50 To 64	0.479	0.973895
ss74845516	All Except Skin and Sex	Diagnosed 50 To 64	0.367	0.973895
ss74850690	All Except Skin and Sex	Diagnosed 50 To 64	0.475	0.973895
ss74852497	All Except Skin and Sex	Diagnosed 50 To 64	0.502	0.973895
ss74852659	All Except Skin and Sex	Diagnosed 50 To 64	0.381	0.973895
ss74852792	All Except Skin and Sex	Diagnosed 50 To 64	0.442	0.973895
ss74818421	All Except Skin and Sex	Diagnosed 50 To 64	0.527	0.975515
ss74824791	All Except Skin and Sex	Diagnosed 50 To 64	0.61	0.975515
ss74835763	All Except Skin and Sex	Diagnosed 50 To 64	0.597	0.975515
ss74851822	All Except Skin and Sex	Diagnosed 50 To 64	0.557	0.975515
ss74830473	All Except Skin and Sex	Diagnosed 50 To 64	0.662	0.980547
ss74853601	All Except Skin and Sex	Diagnosed 50 To 64	0.669	0.980693
ss74812215	All Except Skin and Sex	Diagnosed 50 To 64	0.691	0.982902
ss74841509	All Except Skin and Sex	Diagnosed 50 To 64	0.677	0.982902
ss74811307	All Except Skin and Sex	Diagnosed 50 To 64	0.773	0.989666
ss74828130	All Except Skin and Sex	Diagnosed 50 To 64	0.716	0.989666
ss74829094	All Except Skin and Sex	Diagnosed 50 To 64	0.76	0.989666
ss74840122	All Except Skin and Sex	Diagnosed 50 To 64	0.728	0.989666
ss74850855	All Except Skin and Sex	Diagnosed 50 To 64	0.812	0.989666
ss74851051	All Except Skin and Sex	Diagnosed 50 To 64	0.718	0.989666
ss74852899	All Except Skin and Sex	Diagnosed 50 To 64	0.775	0.989666
ss74818935	All Except Skin and Sex	Diagnosed 50 To 64	0.853	0.995444
ss74822207	All Except Skin and Sex	Diagnosed 50 To 64	0.882	0.995444
ss74824723	All Except Skin and Sex	Diagnosed 50 To 64	0.878	0.995444
ss74852187	All Except Skin and Sex	Diagnosed 50 To 64	0.911	0.995444
ss74831248	All Except Skin and Sex	Diagnosed 50 To 64	0.958	0.996473
ss74807444	All Except Skin and Sex	Diagnosed 50 To 64	0.997	1
ss74809470	All Except Skin Cancer	Diagnosed 50 To 64	0.00141	0.198425
ss74824791	All Except Skin Cancer	Diagnosed 50 To 64	0.00512	0.466221
ss74833053	All Except Skin Cancer	Diagnosed 50 To 64	0.0249	0.731297
142	All Except Skin Cancer	Diagnosed 50 To 64	0.0309	0.771503
1956	All Except Skin Cancer	Diagnosed 50 To 64	0.0422	0.806878
5069	All Except Skin Cancer	Diagnosed 50 To 64	0.0487	0.806878
5449	All Except Skin Cancer	Diagnosed 50 To 64	0.0453	0.806878
7020	All Except Skin Cancer	Diagnosed 50 To 64	0.0537	0.806878
ss74806711	All Except Skin Cancer	Diagnosed 50 To 64	0.0429	0.806878
ss74807493	All Except Skin Cancer	Diagnosed 50 To 64	0.0556	0.806878
4249	All Except Skin Cancer	Diagnosed 50 To 64	0.0679	0.828296
ss74824648	All Except Skin Cancer	Diagnosed 50 To 64	0.0681	0.828296
2033	All Except Skin Cancer	Diagnosed 50 To 64	0.0759	0.853071
26291	All Except Skin Cancer	Diagnosed 50 To 64	0.0784	0.862928
2335	All Except Skin Cancer	Diagnosed 50 To 64	0.0802	0.868179
5578	All Except Skin Cancer	Diagnosed 50 To 64	0.0825	0.880759
7345	All Except Skin Cancer	Diagnosed 50 To 64	0.0959	0.903453
ss74851822	All Except Skin Cancer	Diagnosed 50 To 64	0.108	0.903617
7174	All Except Skin Cancer	Diagnosed 50 To 64	0.129	0.92024
10891	All Except Skin Cancer	Diagnosed 50 To 64	0.144	0.930404
1268	All Except Skin Cancer	Diagnosed 50 To 64	0.211	0.930404
2057	All Except Skin Cancer	Diagnosed 50 To 64	0.137	0.930404
23410	All Except Skin Cancer	Diagnosed 50 To 64	0.199	0.930404
2729	All Except Skin Cancer	Diagnosed 50 To 64	0.23	0.930404
27429	All Except Skin Cancer	Diagnosed 50 To 64	0.207	0.930404
328	All Except Skin Cancer	Diagnosed 50 To 64	0.225	0.930404
4521	All Except Skin Cancer	Diagnosed 50 To 64	0.209	0.930404
5626	All Except Skin Cancer	Diagnosed 50 To 64	0.135	0.930404
7351	All Except Skin Cancer	Diagnosed 50 To 64	0.232	0.930404
ss74811307	All Except Skin Cancer	Diagnosed 50 To 64	0.155	0.930404
ss74822134	All Except Skin Cancer	Diagnosed 50 To 64	0.216	0.930404
ss74828620	All Except Skin Cancer	Diagnosed 50 To 64	0.152	0.930404
ss74850855	All Except Skin Cancer	Diagnosed 50 To 64	0.194	0.930404
ss74851082	All Except Skin Cancer	Diagnosed 50 To 64	0.165	0.930404
ss74854111	All Except Skin Cancer	Diagnosed 50 To 64	0.172	0.930404
ss74806117	All Except Skin Cancer	Diagnosed 50 To 64	0.252	0.933887
ss74830473	All Except Skin Cancer	Diagnosed 50 To 64	0.268	0.947755
ss74850690	All Except Skin Cancer	Diagnosed 50 To 64	0.27	0.947755
2074	All Except Skin Cancer	Diagnosed 50 To 64	0.271	0.949113
3953	All Except Skin Cancer	Diagnosed 50 To 64	0.291	0.949693
4036	All Except Skin Cancer	Diagnosed 50 To 64	0.273	0.949693
596	All Except Skin Cancer	Diagnosed 50 To 64	0.294	0.949693
9612	All Except Skin Cancer	Diagnosed 50 To 64	0.297	0.949693
ss74812215	All Except Skin Cancer	Diagnosed 50 To 64	0.3	0.949693
857	All Except Skin Cancer	Diagnosed 50 To 64	0.319	0.955149
ss74845516	All Except Skin Cancer	Diagnosed 50 To 64	0.328	0.960226
ss74847950	All Except Skin Cancer	Diagnosed 50 To 64	0.325	0.960226
ss74849070	All Except Skin Cancer	Diagnosed 50 To 64	0.33	0.960226
7352	All Except Skin Cancer	Diagnosed 50 To 64	0.336	0.968581
5290	All Except Skin Cancer	Diagnosed 50 To 64	0.338	0.968933
1385	All Except Skin Cancer	Diagnosed 50 To 64	0.34	0.969231
ss74847061	All Except Skin Cancer	Diagnosed 50 To 64	0.341	0.969231
10269	All Except Skin Cancer	Diagnosed 50 To 64	0.368	0.973895
111	All Except Skin Cancer	Diagnosed 50 To 64	0.382	0.973895
1191	All Except Skin Cancer	Diagnosed 50 To 64	0.491	0.973895
1432	All Except Skin Cancer	Diagnosed 50 To 64	0.355	0.973895
355	All Except Skin Cancer	Diagnosed 50 To 64	0.463	0.973895
4000	All Except Skin Cancer	Diagnosed 50 To 64	0.37	0.973895
4803	All Except Skin Cancer	Diagnosed 50 To 64	0.486	0.973895
5580	All Except Skin Cancer	Diagnosed 50 To 64	0.374	0.973895
6391	All Except Skin Cancer	Diagnosed 50 To 64	0.368	0.973895
712	All Except Skin Cancer	Diagnosed 50 To 64	0.439	0.973895
7161	All Except Skin Cancer	Diagnosed 50 To 64	0.481	0.973895
7295	All Except Skin Cancer	Diagnosed 50 To 64	0.46	0.973895
7486	All Except Skin Cancer	Diagnosed 50 To 64	0.403	0.973895
773	All Except Skin Cancer	Diagnosed 50 To 64	0.415	0.973895
ss74808575	All Except Skin Cancer	Diagnosed 50 To 64	0.413	0.973895
ss74811414	All Except Skin Cancer	Diagnosed 50 To 64	0.462	0.973895
ss74815976	All Except Skin Cancer	Diagnosed 50 To 64	0.386	0.973895
ss74823882	All Except Skin Cancer	Diagnosed 50 To 64	0.511	0.973895
ss74824723	All Except Skin Cancer	Diagnosed 50 To 64	0.401	0.973895
ss74828130	All Except Skin Cancer	Diagnosed 50 To 64	0.488	0.973895
ss74829652	All Except Skin Cancer	Diagnosed 50 To 64	0.388	0.973895
ss74831248	All Except Skin Cancer	Diagnosed 50 To 64	0.378	0.973895
ss74839206	All Except Skin Cancer	Diagnosed 50 To 64	0.497	0.973895
ss74852187	All Except Skin Cancer	Diagnosed 50 To 64	0.365	0.973895
ss74852792	All Except Skin Cancer	Diagnosed 50 To 64	0.402	0.973895
1950	All Except Skin Cancer	Diagnosed 50 To 64	0.583	0.975515
2260	All Except Skin Cancer	Diagnosed 50 To 64	0.563	0.975515
2950	All Except Skin Cancer	Diagnosed 50 To 64	0.589	0.975515
3064	All Except Skin Cancer	Diagnosed 50 To 64	0.633	0.975515
3091	All Except Skin Cancer	Diagnosed 50 To 64	0.533	0.975515
3221	All Except Skin Cancer	Diagnosed 50 To 64	0.525	0.975515
3480	All Except Skin Cancer	Diagnosed 50 To 64	0.607	0.975515
3575	All Except Skin Cancer	Diagnosed 50 To 64	0.589	0.975515
5295	All Except Skin Cancer	Diagnosed 50 To 64	0.526	0.975515
5465	All Except Skin Cancer	Diagnosed 50 To 64	0.574	0.975515
8660	All Except Skin Cancer	Diagnosed 50 To 64	0.544	0.975515
ss74806929	All Except Skin Cancer	Diagnosed 50 To 64	0.57	0.975515
ss74809771	All Except Skin Cancer	Diagnosed 50 To 64	0.56	0.975515
ss74818421	All Except Skin Cancer	Diagnosed 50 To 64	0.531	0.975515
ss74818935	All Except Skin Cancer	Diagnosed 50 To 64	0.629	0.975515
ss74823109	All Except Skin Cancer	Diagnosed 50 To 64	0.557	0.975515
ss74826099	All Except Skin Cancer	Diagnosed 50 To 64	0.636	0.975515
ss74832556	All Except Skin Cancer	Diagnosed 50 To 64	0.639	0.975515
ss74850629	All Except Skin Cancer	Diagnosed 50 To 64	0.572	0.975515
ss74852899	All Except Skin Cancer	Diagnosed 50 To 64	0.539	0.975515
2688	All Except Skin Cancer	Diagnosed 50 To 64	0.658	0.980547
5747	All Except Skin Cancer	Diagnosed 50 To 64	0.667	0.980547
539	All Except Skin Cancer	Diagnosed 50 To 64	0.684	0.982902
2185	All Except Skin Cancer	Diagnosed 50 To 64	0.714	0.989666
2908	All Except Skin Cancer	Diagnosed 50 To 64	0.774	0.989666
291	All Except Skin Cancer	Diagnosed 50 To 64	0.722	0.989666
2941	All Except Skin Cancer	Diagnosed 50 To 64	0.779	0.989666
3066	All Except Skin Cancer	Diagnosed 50 To 64	0.766	0.989666
3303	All Except Skin Cancer	Diagnosed 50 To 64	0.744	0.989666
5444	All Except Skin Cancer	Diagnosed 50 To 64	0.764	0.989666
675	All Except Skin Cancer	Diagnosed 50 To 64	0.747	0.989666
7155	All Except Skin Cancer	Diagnosed 50 To 64	0.737	0.989666
8074	All Except Skin Cancer	Diagnosed 50 To 64	0.775	0.989666
ss74816128	All Except Skin Cancer	Diagnosed 50 To 64	0.735	0.989666
ss74829094	All Except Skin Cancer	Diagnosed 50 To 64	0.826	0.989666
ss74838838	All Except Skin Cancer	Diagnosed 50 To 64	0.809	0.989666
ss74841509	All Except Skin Cancer	Diagnosed 50 To 64	0.811	0.989666
ss74852497	All Except Skin Cancer	Diagnosed 50 To 64	0.822	0.989666
ss74852659	All Except Skin Cancer	Diagnosed 50 To 64	0.802	0.989666
ss74853601	All Except Skin Cancer	Diagnosed 50 To 64	0.79	0.989666
2321	All Except Skin Cancer	Diagnosed 50 To 64	0.838	0.991761
ss74806227	All Except Skin Cancer	Diagnosed 50 To 64	0.834	0.991761
ss74851051	All Except Skin Cancer	Diagnosed 50 To 64	0.838	0.991761
5893	All Except Skin Cancer	Diagnosed 50 To 64	0.843	0.99388
1443	All Except Skin Cancer	Diagnosed 50 To 64	0.901	0.995444
3146	All Except Skin Cancer	Diagnosed 50 To 64	0.921	0.995444
3312	All Except Skin Cancer	Diagnosed 50 To 64	0.86	0.995444
351	All Except Skin Cancer	Diagnosed 50 To 64	0.875	0.995444
3727	All Except Skin Cancer	Diagnosed 50 To 64	0.919	0.995444
4792	All Except Skin Cancer	Diagnosed 50 To 64	0.928	0.995444
5663	All Except Skin Cancer	Diagnosed 50 To 64	0.939	0.995444
56648	All Except Skin Cancer	Diagnosed 50 To 64	0.901	0.995444
5830	All Except Skin Cancer	Diagnosed 50 To 64	0.874	0.995444
6908	All Except Skin Cancer	Diagnosed 50 To 64	0.916	0.995444
9365	All Except Skin Cancer	Diagnosed 50 To 64	0.931	0.995444
ss74807444	All Except Skin Cancer	Diagnosed 50 To 64	0.939	0.995444
ss74825747	All Except Skin Cancer	Diagnosed 50 To 64	0.914	0.995444
ss74835763	All Except Skin Cancer	Diagnosed 50 To 64	0.912	0.995444
ss74840122	All Except Skin Cancer	Diagnosed 50 To 64	0.86	0.995444
581	All Except Skin Cancer	Diagnosed 50 To 64	0.948	0.996269
ss74808010	All Except Skin Cancer	Diagnosed 50 To 64	0.963	0.996473
2932	All Except Skin Cancer	Diagnosed 50 To 64	0.986	0.998026
641	All Except Skin Cancer	Diagnosed 50 To 64	0.987	0.998026
ss74829722	All Except Skin Cancer	Diagnosed 50 To 64	0.986	0.998026
ss74822207	All Except Skin Cancer	Diagnosed 50 To 64	0.99	0.998384
1026	All Except Skin Cancer	Diagnosed 50 To 64	0.992	0.99845
2006	All Except Skin Cancer	Diagnosed 50 To 64	0.991	0.99845
5105	All Except Skin Cancer	Diagnosed 50 To 64	1	1
8480	All Except Skin Cancer	Diagnosed 65 To 79	0.00317	0.350511
7012	All Except Skin Cancer	Diagnosed 65 To 79	0.0202	0.7272
3717	All Except Skin Cancer	Diagnosed 65 To 79	0.0319	0.783829
1029	All Except Skin Cancer	Diagnosed 65 To 79	0.0442	0.806878
5110	All Except Skin Cancer	Diagnosed 65 To 79	0.0586	0.806878
26959	All Except Skin Cancer	Diagnosed 65 To 79	0.121	0.903617
10683	All Except Skin Cancer	Diagnosed 65 To 79	0.218	0.930404
2202	All Except Skin Cancer	Diagnosed 65 To 79	0.181	0.930404
2936	All Except Skin Cancer	Diagnosed 65 To 79	0.215	0.930404
4436	All Except Skin Cancer	Diagnosed 65 To 79	0.198	0.930404
5468	All Except Skin Cancer	Diagnosed 65 To 79	0.171	0.930404
835	All Except Skin Cancer	Diagnosed 65 To 79	0.172	0.930404
2885	All Except Skin Cancer	Diagnosed 65 To 79	0.234	0.931959
2071	All Except Skin Cancer	Diagnosed 65 To 79	0.246	0.933887
2	All Except Skin Cancer	Diagnosed 65 To 79	0.24	0.933887
348	All Except Skin Cancer	Diagnosed 65 To 79	0.245	0.933887
6561	All Except Skin Cancer	Diagnosed 65 To 79	0.254	0.933887
1022	All Except Skin Cancer	Diagnosed 65 To 79	0.29	0.949693
7314	All Except Skin Cancer	Diagnosed 65 To 79	0.317	0.955149
2690	All Except Skin Cancer	Diagnosed 65 To 79	0.348	0.969231
4846	All Except Skin Cancer	Diagnosed 65 To 79	0.35	0.969231
1387	All Except Skin Cancer	Diagnosed 65 To 79	0.48	0.973895
2068	All Except Skin Cancer	Diagnosed 65 To 79	0.512	0.973895
2237	All Except Skin Cancer	Diagnosed 65 To 79	0.399	0.973895
3184	All Except Skin Cancer	Diagnosed 65 To 79	0.443	0.973895
3738	All Except Skin Cancer	Diagnosed 65 To 79	0.411	0.973895
2395	All Except Skin Cancer	Diagnosed 65 To 79	0.596	0.975515
5979	All Except Skin Cancer	Diagnosed 65 To 79	0.553	0.975515
6929	All Except Skin Cancer	Diagnosed 65 To 79	0.575	0.975515
7150	All Except Skin Cancer	Diagnosed 65 To 79	0.681	0.982902
9521	All Except Skin Cancer	Diagnosed 65 To 79	0.687	0.982902
4790	All Except Skin Cancer	Diagnosed 65 To 79	0.789	0.989666
5599	All Except Skin Cancer	Diagnosed 65 To 79	0.811	0.989666
578	All Except Skin Cancer	Diagnosed 65 To 79	0.797	0.989666
2353	All Except Skin Cancer	Diagnosed 65 To 79	0.829	0.990959
4001	All Except Skin Cancer	Diagnosed 65 To 79	0.862	0.995444
7422	All Except Skin Cancer	Diagnosed 65 To 79	0.945	0.99582
10210	All Except Skin Cancer	Diagnosed 65 To 79	0.949	0.996473
4217	All Except Skin Cancer	Diagnosed 65 To 79	0.984	0.998026
5291	All Except Skin Cancer	Diagnosed 65 To 79	0.969	0.998026
701	All Except Skin Cancer	Diagnosed 65 To 79	0.985	0.998026
1938	All Except Skin and Sex	Diagnosed 65 To 79	0.00731	0.532653
8480	All Except Skin and Sex	Diagnosed 65 To 79	0.00691	0.532653
2879	All Except Skin and Sex	Diagnosed 65 To 79	0.0128	0.582776
3064	All Except Skin and Sex	Diagnosed 65 To 79	0.0261	0.731297
3717	All Except Skin and Sex	Diagnosed 65 To 79	0.0285	0.747763
10229	All Except Skin and Sex	Diagnosed 65 To 79	0.0374	0.806878
5069	All Except Skin and Sex	Diagnosed 65 To 79	0.0559	0.806878
10683	All Except Skin and Sex	Diagnosed 65 To 79	0.0402	0.806878
2395	All Except Skin and Sex	Diagnosed 65 To 79	0.0364	0.806878
7012	All Except Skin and Sex	Diagnosed 65 To 79	0.0514	0.806878
1444	All Except Skin and Sex	Diagnosed 65 To 79	0.0919	0.903453
345	All Except Skin and Sex	Diagnosed 65 To 79	0.0919	0.903453
291	All Except Skin and Sex	Diagnosed 65 To 79	0.116	0.903617
26959	All Except Skin and Sex	Diagnosed 65 To 79	0.121	0.903617
4436	All Except Skin and Sex	Diagnosed 65 To 79	0.118	0.903617
5770	All Except Skin and Sex	Diagnosed 65 To 79	0.127	0.918673
10891	All Except Skin and Sex	Diagnosed 65 To 79	0.188	0.930404
1191	All Except Skin and Sex	Diagnosed 65 To 79	0.169	0.930404
26291	All Except Skin and Sex	Diagnosed 65 To 79	0.216	0.930404
5578	All Except Skin and Sex	Diagnosed 65 To 79	0.151	0.930404
5747	All Except Skin and Sex	Diagnosed 65 To 79	0.19	0.930404
6908	All Except Skin and Sex	Diagnosed 65 To 79	0.178	0.930404
7161	All Except Skin and Sex	Diagnosed 65 To 79	0.156	0.930404
9612	All Except Skin and Sex	Diagnosed 65 To 79	0.17	0.930404
6561	All Except Skin and Sex	Diagnosed 65 To 79	0.176	0.930404
7314	All Except Skin and Sex	Diagnosed 65 To 79	0.214	0.930404
3221	All Except Skin and Sex	Diagnosed 65 To 79	0.252	0.933887
355	All Except Skin and Sex	Diagnosed 65 To 79	0.252	0.933887
10555	All Except Skin and Sex	Diagnosed 65 To 79	0.243	0.933887
4790	All Except Skin and Sex	Diagnosed 65 To 79	0.253	0.933887
2202	All Except Skin and Sex	Diagnosed 65 To 79	0.261	0.936665
111	All Except Skin and Sex	Diagnosed 65 To 79	0.28	0.949693
5295	All Except Skin and Sex	Diagnosed 65 To 79	0.293	0.949693
7351	All Except Skin and Sex	Diagnosed 65 To 79	0.289	0.949693
2690	All Except Skin and Sex	Diagnosed 65 To 79	0.3	0.949693
6929	All Except Skin and Sex	Diagnosed 65 To 79	0.288	0.949693
1443	All Except Skin and Sex	Diagnosed 65 To 79	0.318	0.955149
2057	All Except Skin and Sex	Diagnosed 65 To 79	0.319	0.955149
9521	All Except Skin and Sex	Diagnosed 65 To 79	0.321	0.957434
3727	All Except Skin and Sex	Diagnosed 65 To 79	0.334	0.9675
2335	All Except Skin and Sex	Diagnosed 65 To 79	0.344	0.969231
2688	All Except Skin and Sex	Diagnosed 65 To 79	0.365	0.973895
3066	All Except Skin and Sex	Diagnosed 65 To 79	0.453	0.973895
3303	All Except Skin and Sex	Diagnosed 65 To 79	0.47	0.973895
4482	All Except Skin and Sex	Diagnosed 65 To 79	0.391	0.973895
5105	All Except Skin and Sex	Diagnosed 65 To 79	0.488	0.973895
5626	All Except Skin and Sex	Diagnosed 65 To 79	0.5	0.973895
6391	All Except Skin and Sex	Diagnosed 65 To 79	0.492	0.973895
7020	All Except Skin and Sex	Diagnosed 65 To 79	0.356	0.973895
7174	All Except Skin and Sex	Diagnosed 65 To 79	0.4	0.973895
7345	All Except Skin and Sex	Diagnosed 65 To 79	0.428	0.973895
7486	All Except Skin and Sex	Diagnosed 65 To 79	0.368	0.973895
8074	All Except Skin and Sex	Diagnosed 65 To 79	0.376	0.973895
8626	All Except Skin and Sex	Diagnosed 65 To 79	0.417	0.973895
8660	All Except Skin and Sex	Diagnosed 65 To 79	0.469	0.973895
1029	All Except Skin and Sex	Diagnosed 65 To 79	0.47	0.973895
1387	All Except Skin and Sex	Diagnosed 65 To 79	0.357	0.973895
2071	All Except Skin and Sex	Diagnosed 65 To 79	0.414	0.973895
348	All Except Skin and Sex	Diagnosed 65 To 79	0.362	0.973895
10269	All Except Skin and Sex	Diagnosed 65 To 79	0.63	0.975515
1432	All Except Skin and Sex	Diagnosed 65 To 79	0.575	0.975515
2729	All Except Skin and Sex	Diagnosed 65 To 79	0.6	0.975515
27429	All Except Skin and Sex	Diagnosed 65 To 79	0.629	0.975515
2932	All Except Skin and Sex	Diagnosed 65 To 79	0.548	0.975515
2950	All Except Skin and Sex	Diagnosed 65 To 79	0.628	0.975515
3146	All Except Skin and Sex	Diagnosed 65 To 79	0.543	0.975515
3575	All Except Skin and Sex	Diagnosed 65 To 79	0.619	0.975515
539	All Except Skin and Sex	Diagnosed 65 To 79	0.542	0.975515
5580	All Except Skin and Sex	Diagnosed 65 To 79	0.541	0.975515
675	All Except Skin and Sex	Diagnosed 65 To 79	0.604	0.975515
7352	All Except Skin and Sex	Diagnosed 65 To 79	0.552	0.975515
2237	All Except Skin and Sex	Diagnosed 65 To 79	0.543	0.975515
2936	All Except Skin and Sex	Diagnosed 65 To 79	0.604	0.975515
5468	All Except Skin and Sex	Diagnosed 65 To 79	0.53	0.975515
578	All Except Skin and Sex	Diagnosed 65 To 79	0.534	0.975515
5893	All Except Skin and Sex	Diagnosed 65 To 79	0.645	0.976175
857	All Except Skin and Sex	Diagnosed 65 To 79	0.65	0.977843
406	All Except Skin and Sex	Diagnosed 65 To 79	0.653	0.978552
1950	All Except Skin and Sex	Diagnosed 65 To 79	0.658	0.980547
2185	All Except Skin and Sex	Diagnosed 65 To 79	0.663	0.980547
4521	All Except Skin and Sex	Diagnosed 65 To 79	0.665	0.980547
56648	All Except Skin and Sex	Diagnosed 65 To 79	0.664	0.980547
1026	All Except Skin and Sex	Diagnosed 65 To 79	0.677	0.982902
1268	All Except Skin and Sex	Diagnosed 65 To 79	0.677	0.982902
3953	All Except Skin and Sex	Diagnosed 65 To 79	0.678	0.982902
5290	All Except Skin and Sex	Diagnosed 65 To 79	0.686	0.982902
773	All Except Skin and Sex	Diagnosed 65 To 79	0.692	0.982902
3738	All Except Skin and Sex	Diagnosed 65 To 79	0.694	0.982902
4846	All Except Skin and Sex	Diagnosed 65 To 79	0.684	0.982902
142	All Except Skin and Sex	Diagnosed 65 To 79	0.766	0.989666
1956	All Except Skin and Sex	Diagnosed 65 To 79	0.745	0.989666
2006	All Except Skin and Sex	Diagnosed 65 To 79	0.795	0.989666
2260	All Except Skin and Sex	Diagnosed 65 To 79	0.79	0.989666
2321	All Except Skin and Sex	Diagnosed 65 To 79	0.707	0.989666
2908	All Except Skin and Sex	Diagnosed 65 To 79	0.746	0.989666
4137	All Except Skin and Sex	Diagnosed 65 To 79	0.776	0.989666
4792	All Except Skin and Sex	Diagnosed 65 To 79	0.751	0.989666
5449	All Except Skin and Sex	Diagnosed 65 To 79	0.801	0.989666
581	All Except Skin and Sex	Diagnosed 65 To 79	0.823	0.989666
5830	All Except Skin and Sex	Diagnosed 65 To 79	0.818	0.989666
7124	All Except Skin and Sex	Diagnosed 65 To 79	0.815	0.989666
712	All Except Skin and Sex	Diagnosed 65 To 79	0.811	0.989666
7295	All Except Skin and Sex	Diagnosed 65 To 79	0.808	0.989666
10210	All Except Skin and Sex	Diagnosed 65 To 79	0.76	0.989666
1022	All Except Skin and Sex	Diagnosed 65 To 79	0.706	0.989666
2068	All Except Skin and Sex	Diagnosed 65 To 79	0.757	0.989666
2353	All Except Skin and Sex	Diagnosed 65 To 79	0.785	0.989666
4001	All Except Skin and Sex	Diagnosed 65 To 79	0.767	0.989666
5599	All Except Skin and Sex	Diagnosed 65 To 79	0.729	0.989666
3312	All Except Skin and Sex	Diagnosed 65 To 79	0.837	0.991761
4000	All Except Skin and Sex	Diagnosed 65 To 79	0.834	0.991761
5465	All Except Skin and Sex	Diagnosed 65 To 79	0.835	0.991761
5979	All Except Skin and Sex	Diagnosed 65 To 79	0.832	0.991761
5444	All Except Skin and Sex	Diagnosed 65 To 79	0.841	0.993792
2074	All Except Skin and Sex	Diagnosed 65 To 79	0.922	0.995444
2941	All Except Skin and Sex	Diagnosed 65 To 79	0.943	0.995444
3480	All Except Skin and Sex	Diagnosed 65 To 79	0.915	0.995444
351	All Except Skin and Sex	Diagnosed 65 To 79	0.882	0.995444
3643	All Except Skin and Sex	Diagnosed 65 To 79	0.909	0.995444
4036	All Except Skin and Sex	Diagnosed 65 To 79	0.93	0.995444
641	All Except Skin and Sex	Diagnosed 65 To 79	0.888	0.995444
2885	All Except Skin and Sex	Diagnosed 65 To 79	0.938	0.995444
3184	All Except Skin and Sex	Diagnosed 65 To 79	0.854	0.995444
5291	All Except Skin and Sex	Diagnosed 65 To 79	0.941	0.995444
7150	All Except Skin and Sex	Diagnosed 65 To 79	0.932	0.995444
7422	All Except Skin and Sex	Diagnosed 65 To 79	0.938	0.995444
1385	All Except Skin and Sex	Diagnosed 65 To 79	0.948	0.996269
4217	All Except Skin and Sex	Diagnosed 65 To 79	0.961	0.996473
2033	All Except Skin and Sex	Diagnosed 65 To 79	0.971	0.998026
4249	All Except Skin and Sex	Diagnosed 65 To 79	0.98	0.998026
701	All Except Skin and Sex	Diagnosed 65 To 79	0.97	0.998026
4803	All Except Skin and Sex	Diagnosed 65 To 79	0.996	1
9365	All Except Skin and Sex	Diagnosed 65 To 79	0.999	1
ss74808575	All Except Skin and Sex	Diagnosed 65 To 79	0.0188	0.709815
ss74829094	All Except Skin and Sex	Diagnosed 65 To 79	0.0265	0.731297
ss74853601	All Except Skin and Sex	Diagnosed 65 To 79	0.0272	0.731297
ss74835763	All Except Skin and Sex	Diagnosed 65 To 79	0.0333	0.785727
ss74806711	All Except Skin and Sex	Diagnosed 65 To 79	0.0563	0.806878
ss74822207	All Except Skin and Sex	Diagnosed 65 To 79	0.0448	0.806878
ss74847950	All Except Skin and Sex	Diagnosed 65 To 79	0.0529	0.806878
ss74847061	All Except Skin and Sex	Diagnosed 65 To 79	0.0816	0.8772
ss74824791	All Except Skin and Sex	Diagnosed 65 To 79	0.116	0.903617
ss74839206	All Except Skin and Sex	Diagnosed 65 To 79	0.126	0.915718
ss74806117	All Except Skin and Sex	Diagnosed 65 To 79	0.205	0.930404
ss74809771	All Except Skin and Sex	Diagnosed 65 To 79	0.201	0.930404
ss74815976	All Except Skin and Sex	Diagnosed 65 To 79	0.172	0.930404
ss74828620	All Except Skin and Sex	Diagnosed 65 To 79	0.211	0.930404
ss74829652	All Except Skin and Sex	Diagnosed 65 To 79	0.214	0.930404
ss74829722	All Except Skin and Sex	Diagnosed 65 To 79	0.217	0.930404
ss74831248	All Except Skin and Sex	Diagnosed 65 To 79	0.194	0.930404
ss74850629	All Except Skin and Sex	Diagnosed 65 To 79	0.215	0.930404
ss74852497	All Except Skin and Sex	Diagnosed 65 To 79	0.138	0.930404
ss74809470	All Except Skin and Sex	Diagnosed 65 To 79	0.259	0.934573
ss74851082	All Except Skin and Sex	Diagnosed 65 To 79	0.289	0.949693
ss74806227	All Except Skin and Sex	Diagnosed 65 To 79	0.317	0.955149
ss74818421	All Except Skin and Sex	Diagnosed 65 To 79	0.35	0.969231
ss74811414	All Except Skin and Sex	Diagnosed 65 To 79	0.431	0.973895
ss74816128	All Except Skin and Sex	Diagnosed 65 To 79	0.402	0.973895
ss74822134	All Except Skin and Sex	Diagnosed 65 To 79	0.417	0.973895
ss74823882	All Except Skin and Sex	Diagnosed 65 To 79	0.37	0.973895
ss74824723	All Except Skin and Sex	Diagnosed 65 To 79	0.365	0.973895
ss74826099	All Except Skin and Sex	Diagnosed 65 To 79	0.505	0.973895
ss74850855	All Except Skin and Sex	Diagnosed 65 To 79	0.382	0.973895
ss74851822	All Except Skin and Sex	Diagnosed 65 To 79	0.458	0.973895
ss74852899	All Except Skin and Sex	Diagnosed 65 To 79	0.363	0.973895
ss74807444	All Except Skin and Sex	Diagnosed 65 To 79	0.585	0.975515
ss74807493	All Except Skin and Sex	Diagnosed 65 To 79	0.632	0.975515
ss74818935	All Except Skin and Sex	Diagnosed 65 To 79	0.531	0.975515
ss74840122	All Except Skin and Sex	Diagnosed 65 To 79	0.639	0.975515
ss74851051	All Except Skin and Sex	Diagnosed 65 To 79	0.594	0.975515
ss74852792	All Except Skin and Sex	Diagnosed 65 To 79	0.567	0.975515
ss74818528	All Except Skin and Sex	Diagnosed 65 To 79	0.641	0.975681
ss74854111	All Except Skin and Sex	Diagnosed 65 To 79	0.646	0.976175
ss74832556	All Except Skin and Sex	Diagnosed 65 To 79	0.693	0.982902
ss74838838	All Except Skin and Sex	Diagnosed 65 To 79	0.681	0.982902
ss74852659	All Except Skin and Sex	Diagnosed 65 To 79	0.682	0.982902
ss74828130	All Except Skin and Sex	Diagnosed 65 To 79	0.718	0.989666
ss74833053	All Except Skin and Sex	Diagnosed 65 To 79	0.796	0.989666
ss74845516	All Except Skin and Sex	Diagnosed 65 To 79	0.807	0.989666
ss74849070	All Except Skin and Sex	Diagnosed 65 To 79	0.801	0.989666
ss74852187	All Except Skin and Sex	Diagnosed 65 To 79	0.762	0.989666
ss74808010	All Except Skin and Sex	Diagnosed 65 To 79	0.843	0.99388
ss74806929	All Except Skin and Sex	Diagnosed 65 To 79	0.942	0.995444
ss74811307	All Except Skin and Sex	Diagnosed 65 To 79	0.868	0.995444
ss74812215	All Except Skin and Sex	Diagnosed 65 To 79	0.914	0.995444
ss74823109	All Except Skin and Sex	Diagnosed 65 To 79	0.923	0.995444
ss74824648	All Except Skin and Sex	Diagnosed 65 To 79	0.921	0.995444
ss74841509	All Except Skin and Sex	Diagnosed 65 To 79	0.892	0.995444
ss74850690	All Except Skin and Sex	Diagnosed 65 To 79	0.878	0.995444
ss74825747	All Except Skin and Sex	Diagnosed 65 To 79	0.973	0.998026
ss74830473	All Except Skin and Sex	Diagnosed 65 To 79	0.974	0.998026
10229	All Except Skin Cancer	Diagnosed 65 To 79	0.00308	0.350511
ss74829094	All Except Skin Cancer	Diagnosed 65 To 79	0.00388	0.37539
ss74847950	All Except Skin Cancer	Diagnosed 65 To 79	0.0263	0.731297
ss74839206	All Except Skin Cancer	Diagnosed 65 To 79	0.0345	0.794488
ss74852497	All Except Skin Cancer	Diagnosed 65 To 79	0.0349	0.794488
5069	All Except Skin Cancer	Diagnosed 65 To 79	0.0542	0.806878
ss74822134	All Except Skin Cancer	Diagnosed 65 To 79	0.0462	0.806878
1444	All Except Skin Cancer	Diagnosed 65 To 79	0.0646	0.820948
6908	All Except Skin Cancer	Diagnosed 65 To 79	0.0638	0.820948
ss74835763	All Except Skin Cancer	Diagnosed 65 To 79	0.0717	0.828296
2309	All Except Skin Cancer	Diagnosed 65 To 79	0.12	0.903617
2688	All Except Skin Cancer	Diagnosed 65 To 79	0.104	0.903617
6117	All Except Skin Cancer	Diagnosed 65 To 79	0.113	0.903617
ss74816128	All Except Skin Cancer	Diagnosed 65 To 79	0.113	0.903617
ss74824723	All Except Skin Cancer	Diagnosed 65 To 79	0.121	0.903617
ss74853601	All Except Skin Cancer	Diagnosed 65 To 79	0.109	0.903617
345	All Except Skin Cancer	Diagnosed 65 To 79	0.128	0.92024
1026	All Except Skin Cancer	Diagnosed 65 To 79	0.171	0.930404
1191	All Except Skin Cancer	Diagnosed 65 To 79	0.189	0.930404
1950	All Except Skin Cancer	Diagnosed 65 To 79	0.208	0.930404
26291	All Except Skin Cancer	Diagnosed 65 To 79	0.222	0.930404
291	All Except Skin Cancer	Diagnosed 65 To 79	0.207	0.930404
3064	All Except Skin Cancer	Diagnosed 65 To 79	0.162	0.930404
3146	All Except Skin Cancer	Diagnosed 65 To 79	0.211	0.930404
355	All Except Skin Cancer	Diagnosed 65 To 79	0.142	0.930404
3727	All Except Skin Cancer	Diagnosed 65 To 79	0.163	0.930404
4036	All Except Skin Cancer	Diagnosed 65 To 79	0.143	0.930404
4792	All Except Skin Cancer	Diagnosed 65 To 79	0.166	0.930404
5105	All Except Skin Cancer	Diagnosed 65 To 79	0.226	0.930404
5290	All Except Skin Cancer	Diagnosed 65 To 79	0.159	0.930404
539	All Except Skin Cancer	Diagnosed 65 To 79	0.147	0.930404
5747	All Except Skin Cancer	Diagnosed 65 To 79	0.166	0.930404
7020	All Except Skin Cancer	Diagnosed 65 To 79	0.144	0.930404
7155	All Except Skin Cancer	Diagnosed 65 To 79	0.192	0.930404
7174	All Except Skin Cancer	Diagnosed 65 To 79	0.194	0.930404
9365	All Except Skin Cancer	Diagnosed 65 To 79	0.184	0.930404
ss74806711	All Except Skin Cancer	Diagnosed 65 To 79	0.135	0.930404
ss74808575	All Except Skin Cancer	Diagnosed 65 To 79	0.139	0.930404
ss74829652	All Except Skin Cancer	Diagnosed 65 To 79	0.204	0.930404
ss74851051	All Except Skin Cancer	Diagnosed 65 To 79	0.132	0.930404
ss74851082	All Except Skin Cancer	Diagnosed 65 To 79	0.179	0.930404
ss74852899	All Except Skin Cancer	Diagnosed 65 To 79	0.224	0.930404
111	All Except Skin Cancer	Diagnosed 65 To 79	0.256	0.933887
8074	All Except Skin Cancer	Diagnosed 65 To 79	0.255	0.933887
ss74815976	All Except Skin Cancer	Diagnosed 65 To 79	0.243	0.933887
ss74826099	All Except Skin Cancer	Diagnosed 65 To 79	0.241	0.933887
ss74850855	All Except Skin Cancer	Diagnosed 65 To 79	0.246	0.933887
2932	All Except Skin Cancer	Diagnosed 65 To 79	0.265	0.943034
ss74823882	All Except Skin Cancer	Diagnosed 65 To 79	0.265	0.943034
3480	All Except Skin Cancer	Diagnosed 65 To 79	0.27	0.947755
7345	All Except Skin Cancer	Diagnosed 65 To 79	0.267	0.947755
3312	All Except Skin Cancer	Diagnosed 65 To 79	0.293	0.949693
4482	All Except Skin Cancer	Diagnosed 65 To 79	0.28	0.949693
8835	All Except Skin Cancer	Diagnosed 65 To 79	0.294	0.949693
ss74809771	All Except Skin Cancer	Diagnosed 65 To 79	0.3	0.949693
ss74833053	All Except Skin Cancer	Diagnosed 65 To 79	0.291	0.949693
9612	All Except Skin Cancer	Diagnosed 65 To 79	0.302	0.95213
ss74847061	All Except Skin Cancer	Diagnosed 65 To 79	0.304	0.952615
10891	All Except Skin Cancer	Diagnosed 65 To 79	0.317	0.955149
4137	All Except Skin Cancer	Diagnosed 65 To 79	0.321	0.957434
ss74806117	All Except Skin Cancer	Diagnosed 65 To 79	0.33	0.960226
1443	All Except Skin Cancer	Diagnosed 65 To 79	0.344	0.969231
5578	All Except Skin Cancer	Diagnosed 65 To 79	0.348	0.969231
581	All Except Skin Cancer	Diagnosed 65 To 79	0.343	0.969231
ss74806227	All Except Skin Cancer	Diagnosed 65 To 79	0.349	0.969231
1268	All Except Skin Cancer	Diagnosed 65 To 79	0.357	0.973895
1432	All Except Skin Cancer	Diagnosed 65 To 79	0.405	0.973895
3221	All Except Skin Cancer	Diagnosed 65 To 79	0.514	0.973895
4000	All Except Skin Cancer	Diagnosed 65 To 79	0.389	0.973895
5159	All Except Skin Cancer	Diagnosed 65 To 79	0.427	0.973895
5626	All Except Skin Cancer	Diagnosed 65 To 79	0.461	0.973895
5830	All Except Skin Cancer	Diagnosed 65 To 79	0.442	0.973895
7161	All Except Skin Cancer	Diagnosed 65 To 79	0.488	0.973895
8660	All Except Skin Cancer	Diagnosed 65 To 79	0.483	0.973895
ss74806929	All Except Skin Cancer	Diagnosed 65 To 79	0.405	0.973895
ss74809470	All Except Skin Cancer	Diagnosed 65 To 79	0.409	0.973895
ss74811414	All Except Skin Cancer	Diagnosed 65 To 79	0.417	0.973895
ss74818935	All Except Skin Cancer	Diagnosed 65 To 79	0.444	0.973895
ss74822207	All Except Skin Cancer	Diagnosed 65 To 79	0.357	0.973895
ss74823109	All Except Skin Cancer	Diagnosed 65 To 79	0.372	0.973895
ss74824648	All Except Skin Cancer	Diagnosed 65 To 79	0.389	0.973895
ss74824791	All Except Skin Cancer	Diagnosed 65 To 79	0.393	0.973895
ss74828620	All Except Skin Cancer	Diagnosed 65 To 79	0.389	0.973895
ss74829722	All Except Skin Cancer	Diagnosed 65 To 79	0.449	0.973895
ss74830473	All Except Skin Cancer	Diagnosed 65 To 79	0.506	0.973895
ss74831248	All Except Skin Cancer	Diagnosed 65 To 79	0.397	0.973895
ss74832556	All Except Skin Cancer	Diagnosed 65 To 79	0.498	0.973895
ss74850690	All Except Skin Cancer	Diagnosed 65 To 79	0.438	0.973895
ss74852792	All Except Skin Cancer	Diagnosed 65 To 79	0.502	0.973895
3643	All Except Skin Cancer	Diagnosed 65 To 79	0.517	0.974528
1385	All Except Skin Cancer	Diagnosed 65 To 79	0.622	0.975515
1938	All Except Skin Cancer	Diagnosed 65 To 79	0.588	0.975515
2033	All Except Skin Cancer	Diagnosed 65 To 79	0.636	0.975515
2074	All Except Skin Cancer	Diagnosed 65 To 79	0.589	0.975515
3084	All Except Skin Cancer	Diagnosed 65 To 79	0.608	0.975515
351	All Except Skin Cancer	Diagnosed 65 To 79	0.638	0.975515
51548	All Except Skin Cancer	Diagnosed 65 To 79	0.636	0.975515
5580	All Except Skin Cancer	Diagnosed 65 To 79	0.631	0.975515
5770	All Except Skin Cancer	Diagnosed 65 To 79	0.545	0.975515
5888	All Except Skin Cancer	Diagnosed 65 To 79	0.556	0.975515
5893	All Except Skin Cancer	Diagnosed 65 To 79	0.606	0.975515
6391	All Except Skin Cancer	Diagnosed 65 To 79	0.611	0.975515
7486	All Except Skin Cancer	Diagnosed 65 To 79	0.623	0.975515
ss74807493	All Except Skin Cancer	Diagnosed 65 To 79	0.534	0.975515
ss74812215	All Except Skin Cancer	Diagnosed 65 To 79	0.547	0.975515
ss74818528	All Except Skin Cancer	Diagnosed 65 To 79	0.556	0.975515
ss74825747	All Except Skin Cancer	Diagnosed 65 To 79	0.608	0.975515
ss74854111	All Except Skin Cancer	Diagnosed 65 To 79	0.595	0.975515
ss74807444	All Except Skin Cancer	Diagnosed 65 To 79	0.646	0.976175
56648	All Except Skin Cancer	Diagnosed 65 To 79	0.653	0.978552
3091	All Except Skin Cancer	Diagnosed 65 To 79	0.665	0.980547
ss74838838	All Except Skin Cancer	Diagnosed 65 To 79	0.668	0.980693
2908	All Except Skin Cancer	Diagnosed 65 To 79	0.672	0.9823
3575	All Except Skin Cancer	Diagnosed 65 To 79	0.672	0.9823
2260	All Except Skin Cancer	Diagnosed 65 To 79	0.688	0.982902
4249	All Except Skin Cancer	Diagnosed 65 To 79	0.685	0.982902
27429	All Except Skin Cancer	Diagnosed 65 To 79	0.697	0.985348
1956	All Except Skin Cancer	Diagnosed 65 To 79	0.776	0.989666
2950	All Except Skin Cancer	Diagnosed 80 Plus	0.82	0.989666
3303	All Except Skin Cancer	Diagnosed 80 Plus	0.774	0.989666
5295	All Except Skin Cancer	Diagnosed 80 Plus	0.771	0.989666
5444	All Except Skin Cancer	Diagnosed 80 Plus	0.816	0.989666
5449	All Except Skin Cancer	Diagnosed 80 Plus	0.809	0.989666
5465	All Except Skin Cancer	Diagnosed 80 Plus	0.774	0.989666
7124	All Except Skin Cancer	Diagnosed 80 Plus	0.824	0.989666
712	All Except Skin Cancer	Diagnosed 80 Plus	0.796	0.989666
773	All Except Skin Cancer	Diagnosed 80 Plus	0.748	0.989666
857	All Except Skin Cancer	Diagnosed 80 Plus	0.761	0.989666
ss74818421	All Except Skin Cancer	Diagnosed 80 Plus	0.76	0.989666
ss74828130	All Except Skin Cancer	Diagnosed 80 Plus	0.819	0.989666
ss74840122	All Except Skin Cancer	Diagnosed 80 Plus	0.764	0.989666
ss74845516	All Except Skin Cancer	Diagnosed 80 Plus	0.713	0.989666
ss74849070	All Except Skin Cancer	Diagnosed 80 Plus	0.81	0.989666
ss74851822	All Except Skin Cancer	Diagnosed 80 Plus	0.803	0.989666
2185	All Except Skin Cancer	Diagnosed 80 Plus	0.834	0.991761
10269	All Except Skin Cancer	Diagnosed 80 Plus	0.89	0.995444
142	All Except Skin Cancer	Diagnosed 80 Plus	0.923	0.995444
2057	All Except Skin Cancer	Diagnosed 80 Plus	0.901	0.995444
2321	All Except Skin Cancer	Diagnosed 80 Plus	0.898	0.995444
2335	All Except Skin Cancer	Diagnosed 80 Plus	0.88	0.995444
2729	All Except Skin Cancer	Diagnosed 80 Plus	0.883	0.995444
2941	All Except Skin Cancer	Diagnosed 80 Plus	0.928	0.995444
3066	All Except Skin Cancer	Diagnosed 80 Plus	0.852	0.995444
3304	All Except Skin Cancer	Diagnosed 80 Plus	0.867	0.995444
3953	All Except Skin Cancer	Diagnosed 80 Plus	0.936	0.995444
4521	All Except Skin Cancer	Diagnosed 80 Plus	0.918	0.995444
4803	All Except Skin Cancer	Diagnosed 80 Plus	0.858	0.995444
641	All Except Skin Cancer	Diagnosed 80 Plus	0.885	0.995444
6464	All Except Skin Cancer	Diagnosed 80 Plus	0.887	0.995444
675	All Except Skin Cancer	Diagnosed 80 Plus	0.872	0.995444
7295	All Except Skin Cancer	Diagnosed 80 Plus	0.85	0.995444
7351	All Except Skin Cancer	Diagnosed 80 Plus	0.919	0.995444
ss74808010	All Except Skin Cancer	Diagnosed 80 Plus	0.852	0.995444
ss74811307	All Except Skin Cancer	Diagnosed 80 Plus	0.867	0.995444
ss74841509	All Except Skin Cancer	Diagnosed 80 Plus	0.916	0.995444
ss74850629	All Except Skin Cancer	Diagnosed 80 Plus	0.891	0.995444
ss74852187	All Except Skin Cancer	Diagnosed 80 Plus	0.88	0.995444
ss74852659	All Except Skin Cancer	Diagnosed 80 Plus	0.913	0.995444
2006	All Except Skin Cancer	Diagnosed 80 Plus	0.961	0.996473
406	All Except Skin Cancer	Diagnosed 80 Plus	0.963	0.996473
7352	All Except Skin Cancer	Diagnosed 80 Plus	0.953	0.996473
4846	All Except Skin Cancer	Diagnosed 80 Plus	0.00665	0.532653
10683	All Except Skin Cancer	Diagnosed 80 Plus	0.0233	0.731297
7150	All Except Skin Cancer	Diagnosed 80 Plus	0.0476	0.806878
3738	All Except Skin Cancer	Diagnosed 80 Plus	0.061	0.819372
26959	All Except Skin Cancer	Diagnosed 80 Plus	0.07	0.828296
7012	All Except Skin Cancer	Diagnosed 80 Plus	0.0766	0.853071
2202	All Except Skin Cancer	Diagnosed 80 Plus	0.0997	0.903453
4217	All Except Skin Cancer	Diagnosed 80 Plus	0.124	0.909725
578	All Except Skin Cancer	Diagnosed 80 Plus	0.131	0.93022
1029	All Except Skin Cancer	Diagnosed 80 Plus	0.209	0.930404
2068	All Except Skin Cancer	Diagnosed 80 Plus	0.172	0.930404
5468	All Except Skin Cancer	Diagnosed 80 Plus	0.211	0.930404
5979	All Except Skin Cancer	Diagnosed 80 Plus	0.166	0.930404
7422	All Except Skin Cancer	Diagnosed 80 Plus	0.211	0.930404
8480	All Except Skin Cancer	Diagnosed 80 Plus	0.244	0.933887
5599	All Except Skin Cancer	Diagnosed 80 Plus	0.291	0.949693
2690	All Except Skin Cancer	Diagnosed 80 Plus	0.308	0.955149
7341	All Except Skin Cancer	Diagnosed 80 Plus	0.349	0.969231
2353	All Except Skin Cancer	Diagnosed 80 Plus	0.484	0.973895
2879	All Except Skin Cancer	Diagnosed 80 Plus	0.482	0.973895
2	All Except Skin Cancer	Diagnosed 80 Plus	0.435	0.973895
9521	All Except Skin Cancer	Diagnosed 80 Plus	0.478	0.973895
1022	All Except Skin Cancer	Diagnosed 80 Plus	0.639	0.975515
348	All Except Skin Cancer	Diagnosed 80 Plus	0.568	0.975515
3184	All Except Skin Cancer	Diagnosed 80 Plus	0.674	0.982902
10210	All Except Skin Cancer	Diagnosed 80 Plus	0.826	0.989666
3717	All Except Skin Cancer	Diagnosed 80 Plus	0.822	0.989666
4001	All Except Skin Cancer	Diagnosed 80 Plus	0.726	0.989666
4790	All Except Skin Cancer	Diagnosed 80 Plus	0.76	0.989666
5156	All Except Skin Cancer	Diagnosed 80 Plus	0.799	0.989666
6561	All Except Skin Cancer	Diagnosed 80 Plus	0.754	0.989666
6929	All Except Skin Cancer	Diagnosed 80 Plus	0.804	0.989666
7314	All Except Skin Cancer	Diagnosed 80 Plus	0.792	0.989666
890	All Except Skin Cancer	Diagnosed 80 Plus	0.725	0.989666
5291	All Except Skin Cancer	Diagnosed 80 Plus	0.908	0.995444
701	All Except Skin Cancer	Diagnosed 80 Plus	0.943	0.995444
1387	All Except Skin Cancer	Diagnosed 80 Plus	0.952	0.996473
2395	All Except Skin Cancer	Diagnosed 80 Plus	0.963	0.996473
2237	All Except Skin Cancer	Diagnosed 80 Plus	0.975	0.998026
2071	All Except Skin Cancer	Diagnosed 80 Plus	0.999	1
1026	All Except Skin and Sex	Diagnosed 80 Plus	0.00241	0.31089
4846	All Except Skin and Sex	Diagnosed 80 Plus	0.0113	0.582776
5444	All Except Skin and Sex	Diagnosed 80 Plus	0.0183	0.70821
3486	All Except Skin and Sex	Diagnosed 80 Plus	0.0495	0.806878
2	All Except Skin and Sex	Diagnosed 80 Plus	0.0452	0.806878
1022	All Except Skin and Sex	Diagnosed 80 Plus	0.0628	0.820948
712	All Except Skin and Sex	Diagnosed 80 Plus	0.0696	0.828296
5830	All Except Skin and Sex	Diagnosed 80 Plus	0.0935	0.903453
2321	All Except Skin and Sex	Diagnosed 80 Plus	0.109	0.903617
3575	All Except Skin and Sex	Diagnosed 80 Plus	0.11	0.903617
3953	All Except Skin and Sex	Diagnosed 80 Plus	0.112	0.903617
2202	All Except Skin and Sex	Diagnosed 80 Plus	0.108	0.903617
1268	All Except Skin and Sex	Diagnosed 80 Plus	0.225	0.930404
291	All Except Skin and Sex	Diagnosed 80 Plus	0.232	0.930404
3221	All Except Skin and Sex	Diagnosed 80 Plus	0.229	0.930404
3303	All Except Skin and Sex	Diagnosed 80 Plus	0.2	0.930404
3574	All Except Skin and Sex	Diagnosed 80 Plus	0.211	0.930404
3643	All Except Skin and Sex	Diagnosed 80 Plus	0.224	0.930404
4482	All Except Skin and Sex	Diagnosed 80 Plus	0.23	0.930404
5290	All Except Skin and Sex	Diagnosed 80 Plus	0.17	0.930404
5578	All Except Skin and Sex	Diagnosed 80 Plus	0.219	0.930404
5626	All Except Skin and Sex	Diagnosed 80 Plus	0.195	0.930404
6391	All Except Skin and Sex	Diagnosed 80 Plus	0.136	0.930404
641	All Except Skin and Sex	Diagnosed 80 Plus	0.228	0.930404
8940	All Except Skin and Sex	Diagnosed 80 Plus	0.168	0.930404
348	All Except Skin and Sex	Diagnosed 80 Plus	0.142	0.930404
1950	All Except Skin and Sex	Diagnosed 80 Plus	0.235	0.931959
672	All Except Skin and Sex	Diagnosed 80 Plus	0.257	0.933887
2353	All Except Skin and Sex	Diagnosed 80 Plus	0.257	0.933887
5295	All Except Skin and Sex	Diagnosed 80 Plus	0.274	0.949693
1029	All Except Skin and Sex	Diagnosed 80 Plus	0.278	0.949693
2237	All Except Skin and Sex	Diagnosed 80 Plus	0.296	0.949693
8480	All Except Skin and Sex	Diagnosed 80 Plus	0.292	0.949693
890	All Except Skin and Sex	Diagnosed 80 Plus	0.282	0.949693
3738	All Except Skin and Sex	Diagnosed 80 Plus	0.304	0.952615
6908	All Except Skin and Sex	Diagnosed 80 Plus	0.316	0.955149
7158	All Except Skin and Sex	Diagnosed 80 Plus	0.319	0.955149
2690	All Except Skin and Sex	Diagnosed 80 Plus	0.315	0.955149
578	All Except Skin and Sex	Diagnosed 80 Plus	0.328	0.960226
2260	All Except Skin and Sex	Diagnosed 80 Plus	0.347	0.969231
10269	All Except Skin and Sex	Diagnosed 80 Plus	0.471	0.973895
1443	All Except Skin and Sex	Diagnosed 80 Plus	0.38	0.973895
1444	All Except Skin and Sex	Diagnosed 80 Plus	0.498	0.973895
2006	All Except Skin and Sex	Diagnosed 80 Plus	0.461	0.973895
2057	All Except Skin and Sex	Diagnosed 80 Plus	0.498	0.973895
2335	All Except Skin and Sex	Diagnosed 80 Plus	0.402	0.973895
3064	All Except Skin and Sex	Diagnosed 80 Plus	0.429	0.973895
3312	All Except Skin and Sex	Diagnosed 80 Plus	0.483	0.973895
3480	All Except Skin and Sex	Diagnosed 80 Plus	0.482	0.973895
355	All Except Skin and Sex	Diagnosed 80 Plus	0.378	0.973895
5449	All Except Skin and Sex	Diagnosed 80 Plus	0.356	0.973895
5747	All Except Skin and Sex	Diagnosed 80 Plus	0.424	0.973895
5893	All Except Skin and Sex	Diagnosed 80 Plus	0.5	0.973895
7295	All Except Skin and Sex	Diagnosed 80 Plus	0.441	0.973895
9365	All Except Skin and Sex	Diagnosed 80 Plus	0.477	0.973895
9612	All Except Skin and Sex	Diagnosed 80 Plus	0.364	0.973895
1387	All Except Skin and Sex	Diagnosed 80 Plus	0.488	0.973895
2879	All Except Skin and Sex	Diagnosed 80 Plus	0.489	0.973895
5156	All Except Skin and Sex	Diagnosed 80 Plus	0.494	0.973895
6929	All Except Skin and Sex	Diagnosed 80 Plus	0.41	0.973895
701	All Except Skin and Sex	Diagnosed 80 Plus	0.425	0.973895
7422	All Except Skin and Sex	Diagnosed 80 Plus	0.436	0.973895
1385	All Except Skin and Sex	Diagnosed 80 Plus	0.609	0.975515
26291	All Except Skin and Sex	Diagnosed 80 Plus	0.637	0.975515
2688	All Except Skin and Sex	Diagnosed 80 Plus	0.634	0.975515
2729	All Except Skin and Sex	Diagnosed 80 Plus	0.605	0.975515
27429	All Except Skin and Sex	Diagnosed 80 Plus	0.637	0.975515
2950	All Except Skin and Sex	Diagnosed 80 Plus	0.632	0.975515
4521	All Except Skin and Sex	Diagnosed 80 Plus	0.624	0.975515
4792	All Except Skin and Sex	Diagnosed 80 Plus	0.638	0.975515
5465	All Except Skin and Sex	Diagnosed 80 Plus	0.583	0.975515
6753	All Except Skin and Sex	Diagnosed 80 Plus	0.614	0.975515
7020	All Except Skin and Sex	Diagnosed 80 Plus	0.633	0.975515
7351	All Except Skin and Sex	Diagnosed 80 Plus	0.607	0.975515
8660	All Except Skin and Sex	Diagnosed 80 Plus	0.59	0.975515
2885	All Except Skin and Sex	Diagnosed 80 Plus	0.581	0.975515
5979	All Except Skin and Sex	Diagnosed 80 Plus	0.623	0.975515
1071	All Except Skin and Sex	Diagnosed 80 Plus	0.64	0.975681
2074	All Except Skin and Sex	Diagnosed 80 Plus	0.643	0.976175
581	All Except Skin and Sex	Diagnosed 80 Plus	0.647	0.976175
3717	All Except Skin and Sex	Diagnosed 80 Plus	0.647	0.976175
4217	All Except Skin and Sex	Diagnosed 80 Plus	0.652	0.978552
345	All Except Skin and Sex	Diagnosed 80 Plus	0.688	0.982902
5105	All Except Skin and Sex	Diagnosed 80 Plus	0.69	0.982902
4790	All Except Skin and Sex	Diagnosed 80 Plus	0.674	0.982902
9521	All Except Skin and Sex	Diagnosed 80 Plus	0.693	0.982902
1432	All Except Skin and Sex	Diagnosed 80 Plus	0.806	0.989666
2033	All Except Skin and Sex	Diagnosed 80 Plus	0.794	0.989666
2185	All Except Skin and Sex	Diagnosed 80 Plus	0.795	0.989666
23410	All Except Skin and Sex	Diagnosed 80 Plus	0.809	0.989666
2932	All Except Skin and Sex	Diagnosed 80 Plus	0.77	0.989666
2941	All Except Skin and Sex	Diagnosed 80 Plus	0.708	0.989666
3727	All Except Skin and Sex	Diagnosed 80 Plus	0.767	0.989666
4000	All Except Skin and Sex	Diagnosed 80 Plus	0.778	0.989666
4137	All Except Skin and Sex	Diagnosed 80 Plus	0.797	0.989666
4249	All Except Skin and Sex	Diagnosed 80 Plus	0.818	0.989666
5069	All Except Skin and Sex	Diagnosed 80 Plus	0.807	0.989666
675	All Except Skin and Sex	Diagnosed 80 Plus	0.785	0.989666
7345	All Except Skin and Sex	Diagnosed 80 Plus	0.796	0.989666
7352	All Except Skin and Sex	Diagnosed 80 Plus	0.775	0.989666
8074	All Except Skin and Sex	Diagnosed 80 Plus	0.765	0.989666
857	All Except Skin and Sex	Diagnosed 80 Plus	0.747	0.989666
10210	All Except Skin and Sex	Diagnosed 80 Plus	0.748	0.989666
10683	All Except Skin and Sex	Diagnosed 80 Plus	0.718	0.989666
3184	All Except Skin and Sex	Diagnosed 80 Plus	0.709	0.989666
5468	All Except Skin and Sex	Diagnosed 80 Plus	0.822	0.989666
5970	All Except Skin and Sex	Diagnosed 80 Plus	0.801	0.989666
7314	All Except Skin and Sex	Diagnosed 80 Plus	0.731	0.989666
328	All Except Skin and Sex	Diagnosed 80 Plus	0.828	0.990529
7012	All Except Skin and Sex	Diagnosed 80 Plus	0.837	0.991761
111	All Except Skin and Sex	Diagnosed 80 Plus	0.889	0.995444
4036	All Except Skin and Sex	Diagnosed 80 Plus	0.886	0.995444
539	All Except Skin and Sex	Diagnosed 80 Plus	0.911	0.995444
5580	All Except Skin and Sex	Diagnosed 80 Plus	0.883	0.995444
6464	All Except Skin and Sex	Diagnosed 80 Plus	0.924	0.995444
7161	All Except Skin and Sex	Diagnosed 80 Plus	0.914	0.995444
2068	All Except Skin and Sex	Diagnosed 80 Plus	0.871	0.995444
2071	All Except Skin and Sex	Diagnosed 80 Plus	0.876	0.995444
2395	All Except Skin and Sex	Diagnosed 80 Plus	0.855	0.995444
4001	All Except Skin and Sex	Diagnosed 80 Plus	0.851	0.995444
5599	All Except Skin and Sex	Diagnosed 80 Plus	0.941	0.995444
7341	All Except Skin and Sex	Diagnosed 80 Plus	0.91	0.995444
1191	All Except Skin and Sex	Diagnosed 80 Plus	0.952	0.996473
4803	All Except Skin and Sex	Diagnosed 80 Plus	0.962	0.996473
10229	All Except Skin and Sex	Diagnosed 80 Plus	0.981	0.998026
6561	All Except Skin and Sex	Diagnosed 80 Plus	0.977	0.998026
142	All Except Skin and Sex	Diagnosed 80 Plus	0.996	1
ss74840122	All Except Skin and Sex	Diagnosed 80 Plus	0.0154	0.623169
ss74809470	All Except Skin and Sex	Diagnosed 80 Plus	0.0576	0.806878
ss74812215	All Except Skin and Sex	Diagnosed 80 Plus	0.0437	0.806878
ss74847061	All Except Skin and Sex	Diagnosed 80 Plus	0.0647	0.820948
ss74851051	All Except Skin and Sex	Diagnosed 80 Plus	0.0684	0.828296
ss74815976	All Except Skin and Sex	Diagnosed 80 Plus	0.0752	0.853071
ss74829722	All Except Skin and Sex	Diagnosed 80 Plus	0.0795	0.866662
ss74807493	All Except Skin and Sex	Diagnosed 80 Plus	0.0983	0.903453
ss74806711	All Except Skin and Sex	Diagnosed 80 Plus	0.113	0.903617
ss74806117	All Except Skin and Sex	Diagnosed 80 Plus	0.177	0.930404
ss74850629	All Except Skin and Sex	Diagnosed 80 Plus	0.154	0.930404
ss74851822	All Except Skin and Sex	Diagnosed 80 Plus	0.194	0.930404
ss74828130	All Except Skin and Sex	Diagnosed 80 Plus	0.247	0.933887
ss74808010	All Except Skin and Sex	Diagnosed 80 Plus	0.274	0.949693
ss74839206	All Except Skin and Sex	Diagnosed 80 Plus	0.292	0.949693
ss74818528	All Except Skin and Sex	Diagnosed 80 Plus	0.306	0.955016
ss74852899	All Except Skin and Sex	Diagnosed 80 Plus	0.309	0.955149
ss74811414	All Except Skin and Sex	Diagnosed 80 Plus	0.327	0.960226
ss74832556	All Except Skin and Sex	Diagnosed 80 Plus	0.339	0.969231
ss74849070	All Except Skin and Sex	Diagnosed 80 Plus	0.352	0.973029
ss74816128	All Except Skin and Sex	Diagnosed 80 Plus	0.463	0.973895
ss74822207	All Except Skin and Sex	Diagnosed 80 Plus	0.44	0.973895
ss74823109	All Except Skin and Sex	Diagnosed 80 Plus	0.419	0.973895
ss74823882	All Except Skin and Sex	Diagnosed 80 Plus	0.404	0.973895
ss74824791	All Except Skin and Sex	Diagnosed 80 Plus	0.478	0.973895
ss74833053	All Except Skin and Sex	Diagnosed 80 Plus	0.501	0.973895
ss74845516	All Except Skin and Sex	Diagnosed 80 Plus	0.47	0.973895
ss74853601	All Except Skin and Sex	Diagnosed 80 Plus	0.459	0.973895
ss74852659	All Except Skin and Sex	Diagnosed 80 Plus	0.52	0.974528
ss74808575	All Except Skin and Sex	Diagnosed 80 Plus	0.538	0.975515
ss74809771	All Except Skin and Sex	Diagnosed 80 Plus	0.558	0.975515
ss74818935	All Except Skin and Sex	Diagnosed 80 Plus	0.573	0.975515
ss74824723	All Except Skin and Sex	Diagnosed 80 Plus	0.564	0.975515
ss74825747	All Except Skin and Sex	Diagnosed 80 Plus	0.624	0.975515
ss74826099	All Except Skin and Sex	Diagnosed 80 Plus	0.605	0.975515
ss74835763	All Except Skin and Sex	Diagnosed 80 Plus	0.601	0.975515
ss74841509	All Except Skin and Sex	Diagnosed 80 Plus	0.612	0.975515
ss74850690	All Except Skin and Sex	Diagnosed 80 Plus	0.617	0.975515
ss74852187	All Except Skin and Sex	Diagnosed 80 Plus	0.594	0.975515
ss74854111	All Except Skin and Sex	Diagnosed 80 Plus	0.616	0.975515
ss74829652	All Except Skin and Sex	Diagnosed 80 Plus	0.648	0.976732
ss74850855	All Except Skin and Sex	Diagnosed 80 Plus	0.667	0.980547
ss74811307	All Except Skin and Sex	Diagnosed 80 Plus	0.702	0.988804
ss74822134	All Except Skin and Sex	Diagnosed 80 Plus	0.703	0.989313
ss74806227	All Except Skin and Sex	Diagnosed 80 Plus	0.737	0.989666
ss74824648	All Except Skin and Sex	Diagnosed 80 Plus	0.788	0.989666
ss74829094	All Except Skin and Sex	Diagnosed 80 Plus	0.818	0.989666
ss74831248	All Except Skin and Sex	Diagnosed 80 Plus	0.741	0.989666
ss74847950	All Except Skin and Sex	Diagnosed 80 Plus	0.765	0.989666
ss74851082	All Except Skin and Sex	Diagnosed 80 Plus	0.767	0.989666
ss74852497	All Except Skin and Sex	Diagnosed 80 Plus	0.771	0.989666
ss74852792	All Except Skin and Sex	Diagnosed 80 Plus	0.744	0.989666
ss74806929	All Except Skin and Sex	Diagnosed 80 Plus	0.931	0.995444
ss74830473	All Except Skin and Sex	Diagnosed 80 Plus	0.923	0.995444
ss74828620	All Except Skin and Sex	Diagnosed 80 Plus	0.951	0.996473
ss74838838	All Except Skin and Sex	Diagnosed 80 Plus	0.983	0.998026
ss74807444	All Except Skin and Sex	Diagnosed 80 Plus	1	1
2321	All Except Skin Cancer	Diagnosed 80 Plus	0.0075	0.532653
1026	All Except Skin Cancer	Diagnosed 80 Plus	0.0127	0.582776
ss74812215	All Except Skin Cancer	Diagnosed 80 Plus	0.0156	0.623169
10891	All Except Skin Cancer	Diagnosed 80 Plus	0.0216	0.731297
ss74851051	All Except Skin Cancer	Diagnosed 80 Plus	0.0268	0.731297
291	All Except Skin Cancer	Diagnosed 80 Plus	0.0556	0.806878
3221	All Except Skin Cancer	Diagnosed 80 Plus	0.0589	0.806878
5465	All Except Skin Cancer	Diagnosed 80 Plus	0.0422	0.806878
ss74840122	All Except Skin Cancer	Diagnosed 80 Plus	0.0575	0.806878
3643	All Except Skin Cancer	Diagnosed 80 Plus	0.0635	0.820948
2006	All Except Skin Cancer	Diagnosed 80 Plus	0.0714	0.828296
ss74829722	All Except Skin Cancer	Diagnosed 80 Plus	0.0687	0.828296
ss74806117	All Except Skin Cancer	Diagnosed 80 Plus	0.0764	0.853071
ss74851822	All Except Skin Cancer	Diagnosed 80 Plus	0.0852	0.893238
345	All Except Skin Cancer	Diagnosed 80 Plus	0.0891	0.895629
111	All Except Skin Cancer	Diagnosed 80 Plus	0.226	0.930404
1385	All Except Skin Cancer	Diagnosed 80 Plus	0.183	0.930404
23410	All Except Skin Cancer	Diagnosed 80 Plus	0.222	0.930404
2941	All Except Skin Cancer	Diagnosed 80 Plus	0.145	0.930404
3486	All Except Skin Cancer	Diagnosed 80 Plus	0.199	0.930404
3574	All Except Skin Cancer	Diagnosed 80 Plus	0.156	0.930404
5444	All Except Skin Cancer	Diagnosed 80 Plus	0.151	0.930404
5747	All Except Skin Cancer	Diagnosed 80 Plus	0.162	0.930404
6391	All Except Skin Cancer	Diagnosed 80 Plus	0.166	0.930404
672	All Except Skin Cancer	Diagnosed 80 Plus	0.201	0.930404
712	All Except Skin Cancer	Diagnosed 80 Plus	0.144	0.930404
857	All Except Skin Cancer	Diagnosed 80 Plus	0.202	0.930404
ss74806711	All Except Skin Cancer	Diagnosed 80 Plus	0.151	0.930404
ss74809771	All Except Skin Cancer	Diagnosed 80 Plus	0.232	0.930404
ss74824648	All Except Skin Cancer	Diagnosed 80 Plus	0.192	0.930404
ss74851082	All Except Skin Cancer	Diagnosed 80 Plus	0.178	0.930404
ss74854111	All Except Skin Cancer	Diagnosed 80 Plus	0.223	0.930404
351	All Except Skin Cancer	Diagnosed 80 Plus	0.24	0.933887
4000	All Except Skin Cancer	Diagnosed 80 Plus	0.25	0.933887
ss74850629	All Except Skin Cancer	Diagnosed 80 Plus	0.241	0.933887
6464	All Except Skin Cancer	Diagnosed 80 Plus	0.262	0.936665
142	All Except Skin Cancer	Diagnosed 80 Plus	0.278	0.949693
3953	All Except Skin Cancer	Diagnosed 80 Plus	0.282	0.949693
5830	All Except Skin Cancer	Diagnosed 80 Plus	0.286	0.949693
ss74830473	All Except Skin Cancer	Diagnosed 80 Plus	0.277	0.949693
ss74835763	All Except Skin Cancer	Diagnosed 80 Plus	0.282	0.949693
ss74838838	All Except Skin Cancer	Diagnosed 80 Plus	0.304	0.952615
2335	All Except Skin Cancer	Diagnosed 80 Plus	0.315	0.955149
ss74807444	All Except Skin Cancer	Diagnosed 80 Plus	0.316	0.955149
ss74847950	All Except Skin Cancer	Diagnosed 80 Plus	0.319	0.955149
1444	All Except Skin Cancer	Diagnosed 80 Plus	0.325	0.960226
4792	All Except Skin Cancer	Diagnosed 80 Plus	0.325	0.960226
7161	All Except Skin Cancer	Diagnosed 80 Plus	0.335	0.9675
4482	All Except Skin Cancer	Diagnosed 80 Plus	0.338	0.968933
10269	All Except Skin Cancer	Diagnosed 80 Plus	0.412	0.973895
1950	All Except Skin Cancer	Diagnosed 80 Plus	0.481	0.973895
1956	All Except Skin Cancer	Diagnosed 80 Plus	0.514	0.973895
2033	All Except Skin Cancer	Diagnosed 80 Plus	0.414	0.973895
2074	All Except Skin Cancer	Diagnosed 80 Plus	0.455	0.973895
2688	All Except Skin Cancer	Diagnosed 80 Plus	0.438	0.973895
3303	All Except Skin Cancer	Diagnosed 80 Plus	0.509	0.973895
3480	All Except Skin Cancer	Diagnosed 80 Plus	0.42	0.973895
3575	All Except Skin Cancer	Diagnosed 80 Plus	0.445	0.973895
4249	All Except Skin Cancer	Diagnosed 80 Plus	0.428	0.973895
4803	All Except Skin Cancer	Diagnosed 80 Plus	0.435	0.973895
5290	All Except Skin Cancer	Diagnosed 80 Plus	0.396	0.973895
5295	All Except Skin Cancer	Diagnosed 80 Plus	0.484	0.973895
539	All Except Skin Cancer	Diagnosed 80 Plus	0.388	0.973895
581	All Except Skin Cancer	Diagnosed 80 Plus	0.418	0.973895
5893	All Except Skin Cancer	Diagnosed 80 Plus	0.457	0.973895
641	All Except Skin Cancer	Diagnosed 80 Plus	0.454	0.973895
7345	All Except Skin Cancer	Diagnosed 80 Plus	0.407	0.973895
9612	All Except Skin Cancer	Diagnosed 80 Plus	0.387	0.973895
ss74806227	All Except Skin Cancer	Diagnosed 80 Plus	0.36	0.973895
ss74806929	All Except Skin Cancer	Diagnosed 80 Plus	0.426	0.973895
ss74807493	All Except Skin Cancer	Diagnosed 80 Plus	0.375	0.973895
ss74811414	All Except Skin Cancer	Diagnosed 80 Plus	0.424	0.973895
ss74816128	All Except Skin Cancer	Diagnosed 80 Plus	0.492	0.973895
ss74822134	All Except Skin Cancer	Diagnosed 80 Plus	0.443	0.973895
ss74822207	All Except Skin Cancer	Diagnosed 80 Plus	0.358	0.973895
ss74828130	All Except Skin Cancer	Diagnosed 80 Plus	0.477	0.973895
ss74828620	All Except Skin Cancer	Diagnosed 80 Plus	0.407	0.973895
ss74831248	All Except Skin Cancer	Diagnosed 80 Plus	0.457	0.973895
ss74841509	All Except Skin Cancer	Diagnosed 80 Plus	0.464	0.973895
ss74847061	All Except Skin Cancer	Diagnosed 80 Plus	0.426	0.973895
ss74852187	All Except Skin Cancer	Diagnosed 80 Plus	0.373	0.973895
ss74852899	All Except Skin Cancer	Diagnosed 80 Plus	0.463	0.973895
4036	All Except Skin Cancer	Diagnosed 80 Plus	0.52	0.974528
1268	All Except Skin Cancer	Diagnosed 80 Plus	0.591	0.975515
1443	All Except Skin Cancer	Diagnosed 80 Plus	0.576	0.975515
2057	All Except Skin Cancer	Diagnosed 80 Plus	0.55	0.975515
27429	All Except Skin Cancer	Diagnosed >50	0.615	0.975515
3064	All Except Skin Cancer	Diagnosed >50	0.559	0.975515
5578	All Except Skin Cancer	Diagnosed >50	0.574	0.975515
5580	All Except Skin Cancer	Diagnosed >50	0.579	0.975515
5626	All Except Skin Cancer	Diagnosed >50	0.631	0.975515
596	All Except Skin Cancer	Diagnosed >50	0.551	0.975515
6908	All Except Skin Cancer	Diagnosed >50	0.552	0.975515
7351	All Except Skin Cancer	Diagnosed >50	0.63	0.975515
8940	All Except Skin Cancer	Diagnosed >50	0.624	0.975515
ss74815976	All Except Skin Cancer	Diagnosed >50	0.639	0.975515
ss74818935	All Except Skin Cancer	Diagnosed >50	0.629	0.975515
ss74824723	All Except Skin Cancer	Diagnosed >50	0.575	0.975515
ss74825747	All Except Skin Cancer	Diagnosed >50	0.638	0.975515
ss74826099	All Except Skin Cancer	Diagnosed >50	0.585	0.975515
ss74829094	All Except Skin Cancer	Diagnosed >50	0.543	0.975515
ss74849070	All Except Skin Cancer	Diagnosed >50	0.547	0.975515
ss74850690	All Except Skin Cancer	Diagnosed >50	0.572	0.975515
ss74850855	All Except Skin Cancer	Diagnosed >50	0.538	0.975515
355	All Except Skin Cancer	Diagnosed >50	0.641	0.975681
9365	All Except Skin Cancer	Diagnosed >50	0.655	0.979652
4137	All Except Skin Cancer	Diagnosed >50	0.667	0.980547
ss74853601	All Except Skin Cancer	Diagnosed >50	0.669	0.980693
3312	All Except Skin Cancer	Diagnosed >50	0.679	0.982902
10229	All Except Skin Cancer	Diagnosed >50	0.825	0.989666
2260	All Except Skin Cancer	Diagnosed >50	0.742	0.989666
4521	All Except Skin Cancer	Diagnosed >50	0.742	0.989666
5105	All Except Skin Cancer	Diagnosed >50	0.714	0.989666
6753	All Except Skin Cancer	Diagnosed >50	0.71	0.989666
8660	All Except Skin Cancer	Diagnosed >50	0.826	0.989666
ss74808010	All Except Skin Cancer	Diagnosed >50	0.715	0.989666
ss74832556	All Except Skin Cancer	Diagnosed >50	0.782	0.989666
ss74833053	All Except Skin Cancer	Diagnosed >50	0.794	0.989666
ss74852497	All Except Skin Cancer	Diagnosed >50	0.789	0.989666
ss74852792	All Except Skin Cancer	Diagnosed >50	0.707	0.989666
7295	All Except Skin Cancer	Diagnosed >50	0.838	0.991761
1191	All Except Skin Cancer	Diagnosed >50	0.863	0.995444
1432	All Except Skin Cancer	Diagnosed >50	0.894	0.995444
2185	All Except Skin Cancer	Diagnosed >50	0.939	0.995444
26291	All Except Skin Cancer	Diagnosed >50	0.856	0.995444
2729	All Except Skin Cancer	Diagnosed >50	0.928	0.995444
5449	All Except Skin Cancer	Diagnosed >50	0.944	0.995444
7020	All Except Skin Cancer	Diagnosed >50	0.9	0.995444
7158	All Except Skin Cancer	Diagnosed >50	0.863	0.995444
7352	All Except Skin Cancer	Diagnosed >50	0.932	0.995444
8074	All Except Skin Cancer	Diagnosed >50	0.938	0.995444
ss74808575	All Except Skin Cancer	Diagnosed >50	0.926	0.995444
ss74809470	All Except Skin Cancer	Diagnosed >50	0.889	0.995444
ss74811307	All Except Skin Cancer	Diagnosed >50	0.944	0.995444
ss74818528	All Except Skin Cancer	Diagnosed >50	0.912	0.995444
ss74823109	All Except Skin Cancer	Diagnosed >50	0.903	0.995444
ss74823882	All Except Skin Cancer	Diagnosed >50	0.848	0.995444
ss74824791	All Except Skin Cancer	Diagnosed >50	0.869	0.995444
ss74852659	All Except Skin Cancer	Diagnosed >50	0.884	0.995444
2932	All Except Skin Cancer	Diagnosed >50	0.957	0.996473
3727	All Except Skin Cancer	Diagnosed >50	0.955	0.996473
ss74829652	All Except Skin Cancer	Diagnosed >50	0.962	0.996473
5069	All Except Skin Cancer	Diagnosed >50	0.988	0.998026
ss74839206	All Except Skin Cancer	Diagnosed >50	0.986	0.998026
ss74845516	All Except Skin Cancer	Diagnosed >50	0.977	0.998026
2950	All Except Skin Cancer	Diagnosed >50	0.992	0.99845
6561	All Except Skin Cancer	Diagnosed >50	0.00357	0.368424
5110	All Except Skin Cancer	Diagnosed >50	0.00856	0.55212
3717	All Except Skin Cancer	Diagnosed >50	0.0157	0.623169
10555	All Except Skin Cancer	Diagnosed >50	0.053	0.806878
4846	All Except Skin Cancer	Diagnosed >50	0.0462	0.806878
7150	All Except Skin Cancer	Diagnosed >50	0.0392	0.806878
1029	All Except Skin Cancer	Diagnosed >50	0.0654	0.823083
10683	All Except Skin Cancer	Diagnosed >50	0.0981	0.903453
26959	All Except Skin Cancer	Diagnosed >50	0.0998	0.903453
2936	All Except Skin Cancer	Diagnosed >50	0.109	0.903617
4001	All Except Skin Cancer	Diagnosed >50	0.12	0.903617
5291	All Except Skin Cancer	Diagnosed >50	0.122	0.903617
6285	All Except Skin Cancer	Diagnosed >50	0.144	0.930404
7314	All Except Skin Cancer	Diagnosed >50	0.209	0.930404
1022	All Except Skin Cancer	Diagnosed >50	0.245	0.933887
2	All Except Skin Cancer	Diagnosed >50	0.247	0.933887
2237	All Except Skin Cancer	Diagnosed >50	0.26	0.936
1387	All Except Skin Cancer	Diagnosed >50	0.299	0.949693
2885	All Except Skin Cancer	Diagnosed >50	0.28	0.949693
348	All Except Skin Cancer	Diagnosed >50	0.322	0.958569
2353	All Except Skin Cancer	Diagnosed >50	0.343	0.969231
2071	All Except Skin Cancer	Diagnosed >50	0.39	0.973895
2202	All Except Skin Cancer	Diagnosed >50	0.393	0.973895
3184	All Except Skin Cancer	Diagnosed >50	0.469	0.973895
545	All Except Skin Cancer	Diagnosed >50	0.51	0.973895
5599	All Except Skin Cancer	Diagnosed >50	0.513	0.973895
8480	All Except Skin Cancer	Diagnosed >50	0.372	0.973895
3738	All Except Skin Cancer	Diagnosed >50	0.519	0.974528
5979	All Except Skin Cancer	Diagnosed >50	0.529	0.975515
7422	All Except Skin Cancer	Diagnosed >50	0.566	0.975515
578	All Except Skin Cancer	Diagnosed >50	0.66	0.980547
835	All Except Skin Cancer	Diagnosed >50	0.684	0.982902
2395	All Except Skin Cancer	Diagnosed >50	0.713	0.989666
4436	All Except Skin Cancer	Diagnosed >50	0.777	0.989666
5371	All Except Skin Cancer	Diagnosed >50	0.727	0.989666
5468	All Except Skin Cancer	Diagnosed >50	0.73	0.989666
701	All Except Skin Cancer	Diagnosed >50	0.774	0.989666
9521	All Except Skin Cancer	Diagnosed >50	0.746	0.989666
10210	All Except Skin Cancer	Diagnosed >50	0.845	0.993967
2690	All Except Skin Cancer	Diagnosed >50	0.912	0.995444
6929	All Except Skin Cancer	Diagnosed >50	0.886	0.995444
7012	All Except Skin Cancer	Diagnosed >50	0.871	0.995444
4217	All Except Skin Cancer	Diagnosed >50	0.962	0.996473
6117	All Except Skin and Sex	Diagnosed >50	0.000376	0.072756
23410	All Except Skin and Sex	Diagnosed >50	0.00139	0.198425
2879	All Except Skin and Sex	Diagnosed >50	0.00757	0.532653
10683	All Except Skin and Sex	Diagnosed >50	0.00906	0.560995
355	All Except Skin and Sex	Diagnosed >50	0.0114	0.582776
10229	All Except Skin and Sex	Diagnosed >50	0.0274	0.731297
2309	All Except Skin and Sex	Diagnosed >50	0.0389	0.806878
3303	All Except Skin and Sex	Diagnosed >50	0.0479	0.806878
3304	All Except Skin and Sex	Diagnosed >50	0.0563	0.806878
5578	All Except Skin and Sex	Diagnosed >50	0.0366	0.806878
1387	All Except Skin and Sex	Diagnosed >50	0.0403	0.806878
111	All Except Skin and Sex	Diagnosed >50	0.067	0.828296
9612	All Except Skin and Sex	Diagnosed >50	0.0854	0.893238
5110	All Except Skin and Sex	Diagnosed >50	0.0891	0.895629
3486	All Except Skin and Sex	Diagnosed >50	0.098	0.903453
5626	All Except Skin and Sex	Diagnosed >50	0.0941	0.903453
712	All Except Skin and Sex	Diagnosed >50	0.122	0.903617
26959	All Except Skin and Sex	Diagnosed >50	0.112	0.903617
3717	All Except Skin and Sex	Diagnosed >50	0.121	0.903617
2033	All Except Skin and Sex	Diagnosed >50	0.208	0.930404
3064	All Except Skin and Sex	Diagnosed >50	0.164	0.930404
3575	All Except Skin and Sex	Diagnosed >50	0.171	0.930404
5069	All Except Skin and Sex	Diagnosed >50	0.163	0.930404
5159	All Except Skin and Sex	Diagnosed >50	0.154	0.930404
5893	All Except Skin and Sex	Diagnosed >50	0.214	0.930404
7155	All Except Skin and Sex	Diagnosed >50	0.199	0.930404
7157	All Except Skin and Sex	Diagnosed >50	0.182	0.930404
2936	All Except Skin and Sex	Diagnosed >50	0.197	0.930404
4846	All Except Skin and Sex	Diagnosed >50	0.204	0.930404
5599	All Except Skin and Sex	Diagnosed >50	0.176	0.930404
578	All Except Skin and Sex	Diagnosed >50	0.211	0.930404
7012	All Except Skin and Sex	Diagnosed >50	0.185	0.930404
6908	All Except Skin and Sex	Diagnosed >50	0.236	0.931959
1444	All Except Skin and Sex	Diagnosed >50	0.248	0.933887
5449	All Except Skin and Sex	Diagnosed >50	0.255	0.933887
10210	All Except Skin and Sex	Diagnosed >50	0.253	0.933887
2353	All Except Skin and Sex	Diagnosed >50	0.246	0.933887
5747	All Except Skin and Sex	Diagnosed >50	0.258	0.934573
2335	All Except Skin and Sex	Diagnosed >50	0.295	0.949693
27429	All Except Skin and Sex	Diagnosed >50	0.291	0.949693
2	All Except Skin and Sex	Diagnosed >50	0.305	0.953818
2950	All Except Skin and Sex	Diagnosed >50	0.309	0.955149
2202	All Except Skin and Sex	Diagnosed >50	0.319	0.955149
345	All Except Skin and Sex	Diagnosed >50	0.33	0.960226
3727	All Except Skin and Sex	Diagnosed >50	0.33	0.960226
4217	All Except Skin and Sex	Diagnosed >50	0.335	0.9675
1026	All Except Skin and Sex	Diagnosed >50	0.337	0.968933
10269	All Except Skin and Sex	Diagnosed >50	0.495	0.973895
10891	All Except Skin and Sex	Diagnosed >50	0.495	0.973895
1432	All Except Skin and Sex	Diagnosed >50	0.472	0.973895
1938	All Except Skin and Sex	Diagnosed >50	0.361	0.973895
26291	All Except Skin and Sex	Diagnosed >50	0.386	0.973895
2688	All Except Skin and Sex	Diagnosed >50	0.493	0.973895
328	All Except Skin and Sex	Diagnosed >50	0.408	0.973895
351	All Except Skin and Sex	Diagnosed >50	0.391	0.973895
3574	All Except Skin and Sex	Diagnosed >50	0.423	0.973895
4000	All Except Skin and Sex	Diagnosed >50	0.481	0.973895
4036	All Except Skin and Sex	Diagnosed >50	0.404	0.973895
5290	All Except Skin and Sex	Diagnosed >50	0.508	0.973895
5295	All Except Skin and Sex	Diagnosed >50	0.513	0.973895
56648	All Except Skin and Sex	Diagnosed >50	0.462	0.973895
581	All Except Skin and Sex	Diagnosed >50	0.45	0.973895
596	All Except Skin and Sex	Diagnosed >50	0.511	0.973895
675	All Except Skin and Sex	Diagnosed >50	0.383	0.973895
7351	All Except Skin and Sex	Diagnosed >50	0.479	0.973895
7352	All Except Skin and Sex	Diagnosed >50	0.435	0.973895
857	All Except Skin and Sex	Diagnosed >50	0.397	0.973895
8835	All Except Skin and Sex	Diagnosed >50	0.511	0.973895
1029	All Except Skin and Sex	Diagnosed >50	0.425	0.973895
2237	All Except Skin and Sex	Diagnosed >50	0.511	0.973895
3184	All Except Skin and Sex	Diagnosed >50	0.488	0.973895
545	All Except Skin and Sex	Diagnosed >50	0.398	0.973895
5468	All Except Skin and Sex	Diagnosed >50	0.464	0.973895
6929	All Except Skin and Sex	Diagnosed >50	0.513	0.973895
7150	All Except Skin and Sex	Diagnosed >50	0.374	0.973895
835	All Except Skin and Sex	Diagnosed >50	0.424	0.973895
3480	All Except Skin and Sex	Diagnosed >50	0.515	0.974528
7020	All Except Skin and Sex	Diagnosed >50	0.518	0.974528
1268	All Except Skin and Sex	Diagnosed >50	0.619	0.975515
2006	All Except Skin and Sex	Diagnosed >50	0.561	0.975515
2941	All Except Skin and Sex	Diagnosed >50	0.576	0.975515
3221	All Except Skin and Sex	Diagnosed >50	0.562	0.975515
3643	All Except Skin and Sex	Diagnosed >50	0.633	0.975515
4137	All Except Skin and Sex	Diagnosed >50	0.527	0.975515
4803	All Except Skin and Sex	Diagnosed >50	0.538	0.975515
5580	All Except Skin and Sex	Diagnosed >50	0.631	0.975515
5591	All Except Skin and Sex	Diagnosed >50	0.597	0.975515
5830	All Except Skin and Sex	Diagnosed >50	0.624	0.975515
5888	All Except Skin and Sex	Diagnosed >50	0.524	0.975515
7486	All Except Skin and Sex	Diagnosed >50	0.611	0.975515
7520	All Except Skin and Sex	Diagnosed >50	0.522	0.975515
8074	All Except Skin and Sex	Diagnosed >50	0.578	0.975515
8626	All Except Skin and Sex	Diagnosed >50	0.599	0.975515
8841	All Except Skin and Sex	Diagnosed >50	0.575	0.975515
2395	All Except Skin and Sex	Diagnosed >50	0.55	0.975515
4001	All Except Skin and Sex	Diagnosed >50	0.532	0.975515
5371	All Except Skin and Sex	Diagnosed >50	0.526	0.975515
5979	All Except Skin and Sex	Diagnosed >50	0.525	0.975515
6561	All Except Skin and Sex	Diagnosed >50	0.62	0.975515
7422	All Except Skin and Sex	Diagnosed >50	0.582	0.975515
3146	All Except Skin and Sex	Diagnosed >50	0.645	0.976175
4282	All Except Skin and Sex	Diagnosed >50	0.642	0.976175
7314	All Except Skin and Sex	Diagnosed >50	0.647	0.976175
2908	All Except Skin and Sex	Diagnosed >50	0.655	0.979652
406	All Except Skin and Sex	Diagnosed >50	0.663	0.980547
5105	All Except Skin and Sex	Diagnosed >50	0.663	0.980547
2885	All Except Skin and Sex	Diagnosed >50	0.66	0.980547
1950	All Except Skin and Sex	Diagnosed >50	0.676	0.982902
51548	All Except Skin and Sex	Diagnosed >50	0.691	0.982902
7124	All Except Skin and Sex	Diagnosed >50	0.69	0.982902
7161	All Except Skin and Sex	Diagnosed >50	0.692	0.982902
3312	All Except Skin and Sex	Diagnosed >50	0.698	0.985861
1385	All Except Skin and Sex	Diagnosed >50	0.755	0.989666
1443	All Except Skin and Sex	Diagnosed >50	0.722	0.989666
2057	All Except Skin and Sex	Diagnosed >50	0.74	0.989666
2185	All Except Skin and Sex	Diagnosed >50	0.736	0.989666
2321	All Except Skin and Sex	Diagnosed >50	0.816	0.989666
2729	All Except Skin and Sex	Diagnosed >50	0.805	0.989666
2932	All Except Skin and Sex	Diagnosed >50	0.795	0.989666
3953	All Except Skin and Sex	Diagnosed >50	0.782	0.989666
7295	All Except Skin and Sex	Diagnosed >50	0.762	0.989666
7345	All Except Skin and Sex	Diagnosed >50	0.736	0.989666
773	All Except Skin and Sex	Diagnosed >50	0.749	0.989666
8660	All Except Skin and Sex	Diagnosed >50	0.743	0.989666
348	All Except Skin and Sex	Diagnosed >50	0.726	0.989666
4436	All Except Skin and Sex	Diagnosed >50	0.721	0.989666
6285	All Except Skin and Sex	Diagnosed >50	0.722	0.989666
8480	All Except Skin and Sex	Diagnosed >50	0.819	0.989666
4521	All Except Skin and Sex	Diagnosed >50	0.833	0.991761
1191	All Except Skin and Sex	Diagnosed >50	0.924	0.995444
1956	All Except Skin and Sex	Diagnosed >50	0.911	0.995444
2074	All Except Skin and Sex	Diagnosed >50	0.915	0.995444
291	All Except Skin and Sex	Diagnosed >50	0.903	0.995444
3084	All Except Skin and Sex	Diagnosed >50	0.866	0.995444
4482	All Except Skin and Sex	Diagnosed >50	0.876	0.995444
539	All Except Skin and Sex	Diagnosed >50	0.919	0.995444
5444	All Except Skin and Sex	Diagnosed >50	0.912	0.995444
5465	All Except Skin and Sex	Diagnosed >50	0.904	0.995444
6391	All Except Skin and Sex	Diagnosed >50	0.874	0.995444
6464	All Except Skin and Sex	Diagnosed >50	0.91	0.995444
7174	All Except Skin and Sex	Diagnosed >50	0.857	0.995444
9365	All Except Skin and Sex	Diagnosed >50	0.904	0.995444
1022	All Except Skin and Sex	Diagnosed >50	0.892	0.995444
2071	All Except Skin and Sex	Diagnosed >50	0.906	0.995444
2690	All Except Skin and Sex	Diagnosed >50	0.862	0.995444
3738	All Except Skin and Sex	Diagnosed >50	0.928	0.995444
701	All Except Skin and Sex	Diagnosed >50	0.881	0.995444
9521	All Except Skin and Sex	Diagnosed >50	0.939	0.995444
3091	All Except Skin and Sex	Diagnosed >50	0.948	0.996269
2073	All Except Skin and Sex	Diagnosed >50	0.962	0.996473
5291	All Except Skin and Sex	Diagnosed >50	0.951	0.996473
142	All Except Skin and Sex	Diagnosed >50	0.989	0.998026
2260	All Except Skin and Sex	Diagnosed >50	0.975	0.998026
4249	All Except Skin and Sex	Diagnosed >50	0.985	0.998026
4792	All Except Skin and Sex	Diagnosed >50	0.969	0.998026
641	All Except Skin and Sex	Diagnosed >50	1	1
ss74829094	All Except Skin and Sex	Diagnosed >50	0.0222	0.731297
ss74835763	All Except Skin and Sex	Diagnosed >50	0.0252	0.731297
ss74806711	All Except Skin and Sex	Diagnosed >50	0.0297	0.753698
ss74839206	All Except Skin and Sex	Diagnosed >50	0.0505	0.806878
ss74806929	All Except Skin and Sex	Diagnosed >50	0.103	0.903617
ss74822207	All Except Skin and Sex	Diagnosed >50	0.116	0.903617
ss74825747	All Except Skin and Sex	Diagnosed >50	0.114	0.903617
ss74829722	All Except Skin and Sex	Diagnosed >50	0.108	0.903617
ss74852792	All Except Skin and Sex	Diagnosed >50	0.114	0.903617
ss74852899	All Except Skin and Sex	Diagnosed >50	0.154	0.930404
ss74853601	All Except Skin and Sex	Diagnosed >50	0.209	0.930404
ss74824791	All Except Skin and Sex	Diagnosed >50	0.257	0.933887
ss74851822	All Except Skin and Sex	Diagnosed >50	0.3	0.949693
ss74852497	All Except Skin and Sex	Diagnosed >50	0.299	0.949693
ss74806117	All Except Skin and Sex	Diagnosed >50	0.315	0.955149
ss74847061	All Except Skin and Sex	Diagnosed >50	0.326	0.960226
ss74838838	All Except Skin and Sex	Diagnosed >50	0.344	0.969231
ss74808575	All Except Skin and Sex	Diagnosed >50	0.379	0.973895
ss74812215	All Except Skin and Sex	Diagnosed >50	0.506	0.973895
ss74815976	All Except Skin and Sex	Diagnosed >50	0.496	0.973895
ss74816128	All Except Skin and Sex	Diagnosed >50	0.514	0.973895
ss74822134	All Except Skin and Sex	Diagnosed >50	0.47	0.973895
ss74828620	All Except Skin and Sex	Diagnosed >50	0.421	0.973895
ss74831248	All Except Skin and Sex	Diagnosed >50	0.513	0.973895
ss74832556	All Except Skin and Sex	Diagnosed >50	0.378	0.973895
ss74833053	All Except Skin and Sex	Diagnosed >50	0.45	0.973895
ss74840122	All Except Skin and Sex	Diagnosed >50	0.398	0.973895
ss74847950	All Except Skin and Sex	Diagnosed >50	0.456	0.973895
ss74850629	All Except Skin and Sex	Diagnosed >50	0.432	0.973895
ss74850690	All Except Skin and Sex	Diagnosed >50	0.364	0.973895
ss74850855	All Except Skin and Sex	Diagnosed >50	0.424	0.973895
ss74854111	All Except Skin and Sex	Diagnosed >50	0.42	0.973895
ss74809771	All Except Skin and Sex	Diagnosed >50	0.52	0.974528
ss74806227	All Except Skin and Sex	Diagnosed >50	0.628	0.975515
ss74824648	All Except Skin and Sex	Diagnosed >50	0.565	0.975515
ss74828130	All Except Skin and Sex	Diagnosed >50	0.544	0.975515
ss74841509	All Except Skin and Sex	Diagnosed >50	0.559	0.975515
ss74845516	All Except Skin and Sex	Diagnosed >50	0.571	0.975515
ss74849070	All Except Skin and Sex	Diagnosed >50	0.633	0.975515
ss74852659	All Except Skin and Sex	Diagnosed >50	0.558	0.975515
ss74808010	All Except Skin and Sex	Diagnosed >50	0.666	0.980547
ss74818421	All Except Skin and Sex	Diagnosed >50	0.798	0.989666
ss74818935	All Except Skin and Sex	Diagnosed >50	0.72	0.989666
ss74823109	All Except Skin and Sex	Diagnosed >50	0.815	0.989666
ss74824723	All Except Skin and Sex	Diagnosed >50	0.815	0.989666
ss74851051	All Except Skin and Sex	Diagnosed >50	0.77	0.989666
ss74851082	All Except Skin and Sex	Diagnosed >50	0.733	0.989666
ss74829652	All Except Skin and Sex	Diagnosed >50	0.827	0.990097
ss74823882	All Except Skin and Sex	Diagnosed >50	0.844	0.993967
ss74807444	All Except Skin and Sex	Diagnosed >50	0.933	0.995444
ss74809470	All Except Skin and Sex	Diagnosed >50	0.855	0.995444
ss74811307	All Except Skin and Sex	Diagnosed >50	0.847	0.995444
ss74826099	All Except Skin and Sex	Diagnosed >50	0.929	0.995444
ss74830473	All Except Skin and Sex	Diagnosed >50	0.941	0.995444
ss74807493	All Except Skin and Sex	Diagnosed >50	0.986	0.998026
ss74811414	All Except Skin and Sex	Diagnosed >50	0.967	0.998026
ss74852187	All Except Skin and Sex	Diagnosed >50	0.989	0.998026
ss74818528	All Except Skin and Sex	Diagnosed >50	0.999	1
1444	All Except Skin Cancer	Diagnosed >50	0.00842	0.55212
ss74822134	All Except Skin Cancer	Diagnosed >50	0.0118	0.582776
ss74829094	All Except Skin Cancer	Diagnosed >50	0.0124	0.582776
ss74852899	All Except Skin Cancer	Diagnosed >50	0.0108	0.582776
1385	All Except Skin Cancer	Diagnosed >50	0.0136	0.601509
8626	All Except Skin Cancer	Diagnosed >50	0.0146	0.623169
ss74839206	All Except Skin Cancer	Diagnosed >50	0.0195	0.718714
5290	All Except Skin Cancer	Diagnosed >50	0.0243	0.731297
ss74824648	All Except Skin Cancer	Diagnosed >50	0.0291	0.75078
ss74850855	All Except Skin Cancer	Diagnosed >50	0.0326	0.785727
2033	All Except Skin Cancer	Diagnosed >50	0.041	0.806878
2099	All Except Skin Cancer	Diagnosed >50	0.057	0.806878
355	All Except Skin Cancer	Diagnosed >50	0.0559	0.806878
7520	All Except Skin Cancer	Diagnosed >50	0.0543	0.806878
1026	All Except Skin Cancer	Diagnosed >50	0.0614	0.819372
5578	All Except Skin Cancer	Diagnosed >50	0.0786	0.862928
ss74852497	All Except Skin Cancer	Diagnosed >50	0.0831	0.881088
5626	All Except Skin Cancer	Diagnosed >50	0.0877	0.895629
ss74807493	All Except Skin Cancer	Diagnosed >50	0.0867	0.895629
3727	All Except Skin Cancer	Diagnosed >50	0.0971	0.903453
ss74806711	All Except Skin Cancer	Diagnosed >50	0.0929	0.903453
4137	All Except Skin Cancer	Diagnosed >50	0.105	0.903617
6117	All Except Skin Cancer	Diagnosed >50	0.119	0.903617
6908	All Except Skin Cancer	Diagnosed >50	0.105	0.903617
857	All Except Skin Cancer	Diagnosed >50	0.119	0.903617
ss74816128	All Except Skin Cancer	Diagnosed >50	0.121	0.903617
ss74854111	All Except Skin Cancer	Diagnosed >50	0.109	0.903617
712	All Except Skin Cancer	Diagnosed >50	0.123	0.906686
7345	All Except Skin Cancer	Diagnosed >50	0.125	0.912736
142	All Except Skin Cancer	Diagnosed >50	0.229	0.930404
2309	All Except Skin Cancer	Diagnosed >50	0.143	0.930404
27429	All Except Skin Cancer	Diagnosed >50	0.188	0.930404
3574	All Except Skin Cancer	Diagnosed >50	0.137	0.930404
51548	All Except Skin Cancer	FullDataset	0.175	0.930404
ss74808575	All Except Skin Cancer	FullDataset	0.23	0.930404
ss74809470	All Except Skin Cancer	FullDataset	0.216	0.930404
ss74824791	All Except Skin Cancer	FullDataset	0.149	0.930404
ss74835763	All Except Skin Cancer	FullDataset	0.211	0.930404
ss74852187	All Except Skin Cancer	FullDataset	0.222	0.930404
111	All Except Skin Cancer	FullDataset	0.236	0.931959
ss74809771	All Except Skin Cancer	FullDataset	0.237	0.933527
1268	All Except Skin Cancer	FullDataset	0.254	0.933887
3953	All Except Skin Cancer	FullDataset	0.242	0.933887
ss74847061	All Except Skin Cancer	FullDataset	0.252	0.933887
7161	All Except Skin Cancer	FullDataset	0.262	0.936665
ss74845516	All Except Skin Cancer	FullDataset	0.27	0.947755
ss74852792	All Except Skin Cancer	FullDataset	0.27	0.947755
10269	All Except Skin Cancer	FullDataset	0.294	0.949693
1432	All Except Skin Cancer	FullDataset	0.29	0.949693
2335	All Except Skin Cancer	FullDataset	0.283	0.949693
5830	All Except Skin Cancer	FullDataset	0.286	0.949693
7020	All Except Skin Cancer	FullDataset	0.291	0.949693
ss74818528	All Except Skin Cancer	FullDataset	0.301	0.950914
2729	All Except Skin Cancer	FullDataset	0.315	0.955149
ss74838838	All Except Skin Cancer	FullDataset	0.312	0.955149
ss74833053	All Except Skin Cancer	FullDataset	0.331	0.961328
1956	All Except Skin Cancer	FullDataset	0.345	0.969231
3064	All Except Skin Cancer	FullDataset	0.346	0.969231
3486	All Except Skin Cancer	FullDataset	0.346	0.969231
1191	All Except Skin Cancer	FullDataset	0.481	0.973895
1950	All Except Skin Cancer	FullDataset	0.418	0.973895
2057	All Except Skin Cancer	FullDataset	0.46	0.973895
26291	All Except Skin Cancer	FullDataset	0.486	0.973895
2688	All Except Skin Cancer	FullDataset	0.361	0.973895
328	All Except Skin Cancer	FullDataset	0.403	0.973895
3303	All Except Skin Cancer	FullDataset	0.473	0.973895
4036	All Except Skin Cancer	FullDataset	0.39	0.973895
4249	All Except Skin Cancer	FullDataset	0.507	0.973895
4282	All Except Skin Cancer	FullDataset	0.504	0.973895
4792	All Except Skin Cancer	FullDataset	0.489	0.973895
596	All Except Skin Cancer	FullDataset	0.376	0.973895
6391	All Except Skin Cancer	FullDataset	0.409	0.973895
7155	All Except Skin Cancer	FullDataset	0.43	0.973895
7157	All Except Skin Cancer	FullDataset	0.401	0.973895
7486	All Except Skin Cancer	FullDataset	0.482	0.973895
8074	All Except Skin Cancer	FullDataset	0.506	0.973895
ss74806117	All Except Skin Cancer	FullDataset	0.394	0.973895
ss74806929	All Except Skin Cancer	FullDataset	0.448	0.973895
ss74823109	All Except Skin Cancer	FullDataset	0.474	0.973895
ss74824723	All Except Skin Cancer	FullDataset	0.374	0.973895
ss74829652	All Except Skin Cancer	FullDataset	0.472	0.973895
ss74847950	All Except Skin Cancer	FullDataset	0.411	0.973895
ss74851051	All Except Skin Cancer	FullDataset	0.463	0.973895
1443	All Except Skin Cancer	FullDataset	0.636	0.975515
3091	All Except Skin Cancer	FullDataset	0.577	0.975515
3146	All Except Skin Cancer	FullDataset	0.553	0.975515
345	All Except Skin Cancer	FullDataset	0.576	0.975515
5069	All Except Skin Cancer	FullDataset	0.597	0.975515
5295	All Except Skin Cancer	FullDataset	0.554	0.975515
5444	All Except Skin Cancer	FullDataset	0.572	0.975515
5449	All Except Skin Cancer	FullDataset	0.601	0.975515
581	All Except Skin Cancer	FullDataset	0.568	0.975515
5888	All Except Skin Cancer	FullDataset	0.541	0.975515
6464	All Except Skin Cancer	FullDataset	0.558	0.975515
7352	All Except Skin Cancer	FullDataset	0.609	0.975515
9365	All Except Skin Cancer	FullDataset	0.628	0.975515
9612	All Except Skin Cancer	FullDataset	0.627	0.975515
ss74811307	All Except Skin Cancer	FullDataset	0.588	0.975515
ss74812215	All Except Skin Cancer	FullDataset	0.539	0.975515
ss74815976	All Except Skin Cancer	FullDataset	0.533	0.975515
ss74818935	All Except Skin Cancer	FullDataset	0.547	0.975515
ss74828130	All Except Skin Cancer	FullDataset	0.631	0.975515
ss74831248	All Except Skin Cancer	FullDataset	0.604	0.975515
ss74850690	All Except Skin Cancer	FullDataset	0.576	0.975515
ss74852659	All Except Skin Cancer	FullDataset	0.601	0.975515
ss74808010	All Except Skin Cancer	FullDataset	0.653	0.978552
ss74823882	All Except Skin Cancer	FullDataset	0.659	0.980547
ss74811414	All Except Skin Cancer	FullDataset	0.671	0.9823
1938	All Except Skin Cancer	FullDataset	0.685	0.982902
5105	All Except Skin Cancer	FullDataset	0.693	0.982902
ss74826099	All Except Skin Cancer	FullDataset	0.694	0.982902
ss74851822	All Except Skin Cancer	FullDataset	0.682	0.982902
4493	All Except Skin Cancer	FullDataset	0.697	0.985348
2941	All Except Skin Cancer	FullDataset	0.7	0.987785
3084	All Except Skin Cancer	FullDataset	0.702	0.988804
10891	All Except Skin Cancer	FullDataset	0.806	0.989666
2006	All Except Skin Cancer	FullDataset	0.797	0.989666
2185	All Except Skin Cancer	FullDataset	0.756	0.989666
2260	All Except Skin Cancer	FullDataset	0.785	0.989666
2908	All Except Skin Cancer	FullDataset	0.718	0.989666
291	All Except Skin Cancer	FullDataset	0.807	0.989666
3480	All Except Skin Cancer	FullDataset	0.812	0.989666
351	All Except Skin Cancer	FullDataset	0.74	0.989666
3575	All Except Skin Cancer	FullDataset	0.816	0.989666
539	All Except Skin Cancer	FullDataset	0.818	0.989666
5465	All Except Skin Cancer	FullDataset	0.82	0.989666
5580	All Except Skin Cancer	FullDataset	0.758	0.989666
5893	All Except Skin Cancer	FullDataset	0.823	0.989666
641	All Except Skin Cancer	FullDataset	0.766	0.989666
7124	All Except Skin Cancer	FullDataset	0.762	0.989666
7174	All Except Skin Cancer	FullDataset	0.825	0.989666
7295	All Except Skin Cancer	FullDataset	0.795	0.989666
773	All Except Skin Cancer	FullDataset	0.726	0.989666
8660	All Except Skin Cancer	FullDataset	0.765	0.989666
8841	All Except Skin Cancer	FullDataset	0.728	0.989666
ss74807444	All Except Skin Cancer	FullDataset	0.823	0.989666
ss74818421	All Except Skin Cancer	FullDataset	0.823	0.989666
ss74829722	All Except Skin Cancer	FullDataset	0.773	0.989666
ss74832556	All Except Skin Cancer	FullDataset	0.779	0.989666
ss74841509	All Except Skin Cancer	FullDataset	0.8	0.989666
ss74851082	All Except Skin Cancer	FullDataset	0.809	0.989666
406	All Except Skin Cancer	FullDataset	0.835	0.991761
2321	All Except Skin Cancer	FullDataset	0.843	0.99388
2950	All Except Skin Cancer	FullDataset	0.88	0.995444
3304	All Except Skin Cancer	FullDataset	0.883	0.995444
3312	All Except Skin Cancer	FullDataset	0.939	0.995444
4000	All Except Skin Cancer	FullDataset	0.886	0.995444
4521	All Except Skin Cancer	FullDataset	0.863	0.995444
4803	All Except Skin Cancer	FullDataset	0.89	0.995444
5159	All Except Skin Cancer	FullDataset	0.921	0.995444
5591	All Except Skin Cancer	FullDataset	0.884	0.995444
56648	All Except Skin Cancer	FullDataset	0.864	0.995444
8835	All Except Skin Cancer	FullDataset	0.905	0.995444
ss74806227	All Except Skin Cancer	FullDataset	0.867	0.995444
ss74822207	All Except Skin Cancer	FullDataset	0.851	0.995444
ss74825747	All Except Skin Cancer	FullDataset	0.88	0.995444
ss74830473	All Except Skin Cancer	FullDataset	0.929	0.995444
ss74850629	All Except Skin Cancer	FullDataset	0.858	0.995444
ss74853601	All Except Skin Cancer	FullDataset	0.906	0.995444
ss74828620	All Except Skin Cancer	FullDataset	0.946	0.996196
3643	All Except Skin Cancer	FullDataset	0.961	0.996473
ss74840122	All Except Skin Cancer	FullDataset	0.957	0.996473
2073	All Except Skin Cancer	FullDataset	0.982	0.998026
2074	All Except Skin Cancer	FullDataset	0.968	0.998026
2932	All Except Skin Cancer	FullDataset	0.98	0.998026
3221	All Except Skin Cancer	FullDataset	0.989	0.998026
5747	All Except Skin Cancer	FullDataset	0.976	0.998026
7351	All Except Skin Cancer	FullDataset	0.974	0.998026
ss74849070	All Except Skin Cancer	FullDataset	0.988	0.998026

## Sheet: 2d.TwoSNPsPerGene
Supplementary Table 2d.Detailed Kaplan Meier Results for GPX4 gene that demonstrated age-dependent survival patterns
Columns C to F is the number of individuals that possessed wild type and variant genotypes, and the (#Obs) value in the same columns is the number of observed events for each genotype in the Kaplan Meier analysis
	#WT_WT (#Obs)	#WT_Var (#Obs)	#Var_WT (#Obs)	#Var_Var (#Obs)	Log Rank P Value	Adjusted Log Rank (FDR)	5 Year Survival Rate (%, 95% CI)
							WT_WT	WT_Var	Var_WT	Var_Var
All Except Skin Cancer
Full Dataset	475 (259)	402 (221)	108 (88)	50 (36)	0.000207	0.0457766	70.7 (66.7-77.0)	72.4 (68.1-77.1)	58.2 (49.6-68.3)	54.7 (42.3-70.8)
Aged 50-64	159 (62)	147 (62)	29 (16)	16 (6)	0.941	0.995	87.5 (82.1-92.6)	84.8 (79.1-90.9)	86.2 (74.5-99.7)	87.5 (72.7-100)
Aged 65-79	233 (131)	198 (113)	47 (42)	26 (22)	4.21e-05	0.0130342	70.0 (64.3-76.1)	72.5 (66.3-79.2)	52.8 (40.3-69.4)	38.9 (23.5-64.4)
Aged 80+	83 (66)	57 (46)	32 (30)	8 (7)	0.482	0.984	41.2 (31.7-53.7)	38.7 (27.6-54.5)	37.5 (23.9-58.7)	25.0 (7.5-83.0)
All Except Skin and Sex Cancer
Full Dataset	265 (170)	188 (130)	55 (50)	30 (24)	0.00757	0.046	57.0 (51.3-63.3)	50.5 (43.9-58.2)	43.6 (32.3-58.9)	36.7 (22.9-58.7)
Aged 50-64	69 (37)	54 (35)	9(8)	8 (4)	0.173	0.93	74.9 (65.2-86.0)	62.7 (51.1-77.1)	66.7 (42.0-100)	72.9 (46.8-100)
Aged 65-79	141 (87)	96 (63)	24 (22)	17 (15)	0.0128	0.583	55.3 (47.4-64.7)	49.8 (40.3-61.5)	33.3 (18.9-58.7)	26.5 (11.6-60.4)
Aged 80+	55 (46)	38 (32)	22 (20)	5 (5)	0.489	0.978	25.7 (16.1-41.1)	26.5 (15.1-46.7)	45.5 (28.7-71.8)	N/A

## Sheet: 2e.MoreThanTwoSNPsPerGene
Supplementary Table 2e.Detailed Kaplan Meier Results for SIRT3 gene that demonstrated age-dependent survival patterns
Columns C to E is the number of individuals that possessed wild type and variant genotypes, and the (#Obs) value in the same columns is the number of observed events for each genotype in the Kaplan Meier analysis
All Except Skin Cancer	# High (#Obs)	# Low (#Obs)	# Medium (#Obs)	Log Rank P Value	Adjusted Log Rank (FDR)	5 Year Survival Rate (%, 95% CI)
						High	Low	Medium
Full Dataset	646 (343)	106 (82)	285 (188)	3.54e-07	8.88552e-06	72.6 (69.1-76.2)	60.1 (51.3-70.4)	66.0 (60.6-71.8)
Aged 50-64	234 (90)	31 (14)	88 (44)	0.199	0.93	85.3 (80.9-90.0)	93.0 (84.0-100.0)	89.5 (83.3-96.3)
Aged 65-79	298 (159)	51 (47)	152 (105)	5.74e-09	8.88552e-06	74.5 (69.6-79.8)	45.9 (33.9-62.2)	61.3 (53.9-69.8)
Aged 80+	114 (94)	24 (20)	45 (39)	0.22	0.93	40.9 (32.7-51.2)	46.9 (30.1-73.0)	33.4 (21.7-51.5)
All Except Skin and Sex Cancer
Full Dataset	330 (215)	63 (55)	144 (105)	0.00139	0.198	56.7 (51.5-62.5)	42.6 (31.8-57.2)	45.1 (37.4-54.3)
Aged 50-64	96 (57)	12 (8)	33 (20)	0.663	0.93	66.6 (57.8-76.8)	91.7 (77.2-100)	71.3 (57.1-89.1)
Aged 65-79	159 (92)	36 (35)	80 (59)	3.97e-07	8.88e-06	61.6 (54.1-70.2)	31.9 (19.6-51.9)	37.7 (28.2-50.4)
Aged 80+	75 (66)	15 (12)	31 (26)	0.809	0.93	33.4 (24.2-46.3)	26.9 (10.9-66.3)	28.5 (15.9-50.9)

## Sheet: 2f.PathwayAnalysis
Supplementary Table 2f. Full Kaplan Meier results for pathway analysis
Pathway Code	Pathway Name	Cancer Category	Age Category	Log Rank P Value	Adjusted Log Rank (FDR)	Significant SNPs after FDR (marked with *); marginal significance marked with **
KEGG	hsa04010	MAPKSignalling	All Except Skin Cancer	Full Data set	0.000205	0.0128125	*
KEGG	hsa04151	PI3K-AktSignalling	All Except Skin Cancer	Full Data set	0.000137	0.0128125	*
KEGG	hsa04150	mTORSignalling	All Except Skin And Sex Cancer	Full Data set	0.000712	0.0296667	*
KEGG	hsa04151	PI3K-AktSignalling	All Except Skin And Sex Cancer	Full Data set	0.0011	0.034375	*
KEGG	hsa04015	Rap1Signalling	All Except Skin Cancer	Diagnosed 65 To 79	0.00423	0.05875	**
KEGG	hsa04068	FoxOSignalling	All Except Skin Cancer	Diagnosed 65 To 79	0.00358	0.05875	**
KEGG	hsa04110	CellCycle	All Except Skin Cancer	Diagnosed 65 To 79	0.00401	0.05875	**
KEGG	hsa04664	FcEpsilonSignalling	All Except Skin Cancer	Diagnosed 80 Plus	0.00239	0.05875	**
KEGG	hsa04668	TNFSignalling	All Except Skin Cancer	Diagnosed 80 Plus	0.00289	0.05875	**
KEGG	hsa04668	TNFSignalling	All Except Skin And Sex Cancer	Full Data set	0.00649	0.081125	**
KEGG	hsa04115	p53Signalling	All Except Skin Cancer	Diagnosed 50 To 64	0.00886	0.0925	**
KEGG	hsa04015	Rap1Signalling	All Except Skin And Sex Cancer	Full Data set	0.00888	0.0925	**
KEGG	hsa04668	TNFSignalling	All Except Skin And Sex Cancer	Diagnosed 50 To 64	0.0103	0.0928571	**
KEGG	hsa04668	TNFSignalling	All Except Skin Cancer	Full Data set	0.0104	0.0928571	**
KEGG	hsa04110	CellCycle	All Except Skin And Sex Cancer	Diagnosed 65 To 79	0.0173	0.144167
KEGG	hsa04668	TNFSignalling	All Except Skin And Sex Cancer	Diagnosed 80 Plus	0.0211	0.159028
KEGG	hsa04010	MAPKSignalling	All Except Skin And Sex Cancer	Full Data set	0.0222	0.159028
KEGG	hsa04015	Rap1Signalling	All Except Skin Cancer	Full Data set	0.0229	0.159028
KEGG	hsa04014	RasSignalling	All Except Skin And Sex Cancer	Diagnosed 65 To 79	0.0315	0.1875
KEGG	hsa04664	FcEpsilonSignalling	All Except Skin And Sex Cancer	Diagnosed 80 Plus	0.0311	0.1875
KEGG	hsa04150	mTORSignalling	All Except Skin Cancer	Full Data set	0.0295	0.1875
KEGG	hsa04015	Rap1Signalling	All Except Skin Cancer	Diagnosed 50 To 64	0.0368	0.191667
KEGG	hsa04068	FoxOSignalling	All Except Skin And Sex Cancer	Diagnosed 65 To 79	0.0344	0.191667
KEGG	hsa5416	Myocarditis	AllExceptSkinCancer	Diagnosed 65 To 79	0.0357	0.191667
KEGG	hsa04115	p53Signalling	All Except Skin Cancer	Diagnosed 65 To 79	0.043	0.215
KEGG	hsa03460	FanconiAnemia	All Except Skin Cancer	Diagnosed 50 To 64	0.0506	0.238793
KEGG	hsa03460	FanconiAnemia	All Except Skin Cancer	Diagnosed 80 Plus	0.0554	0.238793
KEGG	hsa03460	FanconiAnemia	All Except Skin And Sex Cancer	Full Data set	0.0553	0.238793
KEGG	hsa03460	FanconiAnemia	All Except Skin Cancer	Full Data set	0.0535	0.238793
KEGG	hsa04014	RasSignalling	All Except Skin Cancer	Diagnosed 65 To 79	0.0666	0.254545
KEGG	hsa04668	TNFSignalling	All Except Skin Cancer	Diagnosed 65 To 79	0.0672	0.254545
KEGG	hsa04110	CellCycle	All Except Skin Cancer	Full Data set	0.0655	0.254545
KEGG	hsa04115	p53Signalling	All Except Skin Cancer	Full Data set	0.0645	0.254545
KEGG	hsa5416	Myocarditis	All Except Skin And Sex Cancer	Diagnosed 65 To 79	0.0703	0.258456
KEGG	hsa04662	BCellReceptorSignalling	All Except Skin Cancer	Full Data set	0.0751	0.268214
KEGG	hsa04664	FcEpsilonSignalling	All Except Skin Cancer	Full Data set	0.0775	0.269097
KEGG	hsa04210	Apoptosis	All Except Skin And Sex Cancer	Diagnosed 65 To 79	0.0855	0.276282
KEGG	hsa04210	Apoptosis	All Except Skin And Sex Cancer	Full Data set	0.0842	0.276282
KEGG	hsa04014	RasSignalling	All Except Skin Cancer	Full Data set	0.0862	0.276282
KEGG	hsa04064	NFKappaBSignalling	All Except Skin And Sex Cancer	Diagnosed 80 Plus	0.091	0.284375
KEGG	hsa04014	RasSignalling	All Except Skin And Sex Cancer	Full Data set	0.106	0.323171
KEGG	hsa04210	Apoptosis	All Except Skin Cancer	Diagnosed 65 To 79	0.115	0.334302
KEGG	hsa5416	Myocarditis	AllExceptSkinCancer	Diagnosed 80 Plus	0.114	0.334302
KEGG	hsa5416	Myocarditis	All Except Skin Cancer	Full Data set	0.118	0.335227
KEGG	hsa04115	p53Signalling	All Except Skin And Sex Cancer	Diagnosed 65 To 79	0.124	0.339674
KEGG	hsa03460	FanconiAnemia	All Except Skin And Sex Cancer	Diagnosed 80 Plus	0.125	0.339674
KEGG	hsa04152	AMPKSignalling	All Except Skin Cancer	Diagnosed 65 To 79	0.129	0.341146
KEGG	hsa04660	TCellReceptorSignalling	All Except Skin Cancer	Diagnosed 80 Plus	0.131	0.341146
KEGG	hsa04115	p53Signalling	All Except Skin And Sex Cancer	Diagnosed 50 To 64	0.147	0.346698
KEGG	hsa04064	NFKappaBSignalling	All Except Skin Cancer	Diagnosed 50 To 64	0.143	0.346698
KEGG	hsa04662	BCellReceptorSignalling	All Except Skin Cancer	Diagnosed 50 To 64	0.142	0.346698
KEGG	hsa04152	AMPKSignalling	All Except Skin And Sex Cancer	Diagnosed 65 To 79	0.145	0.346698
KEGG	hsa05414	DilatedCardiomyopathy	All Except Skin And Sex Cancer	Full Data set	0.146	0.346698
KEGG	hsa04664	FcEpsilonSignalling	All Except Skin Cancer	Diagnosed 65 To 79	0.16	0.357143
KEGG	hsa04662	BCellReceptorSignalling	All Except Skin Cancer	Diagnosed 80 Plus	0.158	0.357143
KEGG	hsa04152	AMPKSignalling	All Except Skin Cancer	Full Data set	0.157	0.357143
KEGG	hsa04014	RasSignalling	All Except Skin Cancer	Diagnosed 50 To 64	0.163	0.357456
KEGG	hsa04210	Apoptosis	All Except Skin Cancer	Full Data set	0.17	0.366379
KEGG	hsa04068	FoxOSignalling	All Except Skin Cancer	Full Data set	0.173	0.366525
KEGG	hsa04152	AMPKSignalling	All Except Skin And Sex Cancer	Diagnosed 80 Plus	0.176	0.366667
KEGG	hsa04668	TNFSignalling	All Except Skin Cancer	Diagnosed 50 To 64	0.185	0.379098
KEGG	hsa04910	InsulinSignalling	All Except Skin And Sex Cancer	Diagnosed 65 To 79	0.2	0.396825
KEGG	hsa04110	CellCycle	All Except Skin And Sex Cancer	Full Data set	0.197	0.396825
KEGG	hsa03460	FanconiAnemia	All Except Skin And Sex Cancer	Diagnosed 50 To 64	0.206	0.402344
KEGG	hsa04668	TNFSignalling	All Except Skin And Sex Cancer	Diagnosed 65 To 79	0.21	0.403409
KEGG	hsa04662	BCellReceptorSignalling	All Except Skin And Sex Cancer	Full Data set	0.213	0.403409
KEGG	hsa04664	FcEpsilonSignalling	All Except Skin And Sex Cancer	Full Data set	0.223	0.416045
KEGG	hsa04664	FcEpsilonSignalling	All Except Skin And Sex Cancer	Diagnosed 65 To 79	0.228	0.419118
KEGG	hsa04660	TCellReceptorSignalling	All Except Skin Cancer	Diagnosed 50 To 64	0.232	0.42029
KEGG	hsa04152	AMPKSignalling	All Except Skin Cancer	Diagnosed 50 To 64	0.246	0.432292
KEGG	hsa03420	NucleotideExcisionRepair	All Except Skin And Sex Cancer	Diagnosed 80 Plus	0.248	0.432292
KEGG	hsa5416	Myocarditis	All Except Skin And Sex Cancer	Full Data set	0.249	0.432292
KEGG	hsa04662	BCellReceptorSignalling	All Except Skin And Sex Cancer	Diagnosed 50 To 64	0.271	0.45777
KEGG	hsa5416	Myocarditis	AllExceptSkinCancer	Diagnosed 50 To 64	0.269	0.45777
KEGG	hsa04152	AMPKSignalling	All Except Skin Cancer	Diagnosed 80 Plus	0.275	0.458333
KEGG	hsa04115	p53Signalling	All Except Skin And Sex Cancer	Full Data set	0.287	0.472039
KEGG	hsa04210	Apoptosis	All Except Skin Cancer	Diagnosed 80 Plus	0.295	0.478896
KEGG	hsa04150	mTORSignalling	All Except Skin Cancer	Diagnosed 65 To 79	0.312	0.5
KEGG	hsa04660	TCellReceptorSignalling	All Except Skin And Sex Cancer	Diagnosed 80 Plus	0.331	0.523734
KEGG	hsa04660	TCellReceptorSignalling	All Except Skin And Sex Cancer	Full Data set	0.372	0.58125
KEGG	hsa04064	NFKappaBSignalling	All Except Skin And Sex Cancer	Diagnosed 50 To 64	0.39	0.601852
KEGG	hsa04064	NFKappaBSignalling	All Except Skin And Sex Cancer	Diagnosed 65 To 79	0.397	0.605183
KEGG	hsa03420	NucleotideExcisionRepair	All Except Skin Cancer	Diagnosed 50 To 64	0.412	0.613095
KEGG	hsa04910	InsulinSignalling	All Except Skin And Sex Cancer	Full Data set	0.411	0.613095
KEGG	hsa04210	Apoptosis	All Except Skin Cancer	Diagnosed 50 To 64	0.424	0.623529
KEGG	hsa5416	Myocarditis	All Except Skin And Sex Cancer	Diagnosed 80 Plus	0.448	0.643678
KEGG	hsa04152	AMPKSignalling	All Except Skin And Sex Cancer	Full Data set	0.445	0.643678
KEGG	hsa04068	FoxOSignalling	All Except Skin And Sex Cancer	Diagnosed 50 To 64	0.473	0.671875
KEGG	hsa04068	FoxOSignalling	All Except Skin Cancer	Diagnosed 50 To 64	0.527	0.740169
KEGG	hsa04660	TCellReceptorSignalling	All Except Skin And Sex Cancer	Diagnosed 50 To 64	0.554	0.76511
KEGG	hsa04068	FoxOSignalling	All Except Skin And Sex Cancer	Full Data set	0.557	0.76511
KEGG	hsa03420	NucleotideExcisionRepair	All Except Skin Cancer	Diagnosed 65 To 79	0.598	0.807796
KEGG	hsa04068	FoxOSignalling	All Except Skin Cancer	Diagnosed 80 Plus	0.601	0.807796
KEGG	hsa04152	AMPKSignalling	All Except Skin And Sex Cancer	Diagnosed 50 To 64	0.622	0.8125
KEGG	hsa04664	FcEpsilonSignalling	All Except Skin Cancer	Diagnosed 50 To 64	0.624	0.8125
KEGG	hsa04064	NFKappaBSignalling	All Except Skin Cancer	Diagnosed 65 To 79	0.613	0.8125
KEGG	hsa05414	DilatedCardiomyopathy	AllExceptSkinCancer	Diagnosed 65 To 79	0.631	0.813144
KEGG	hsa5416	Myocarditis	All Except Skin And Sex Cancer	Diagnosed 50 To 64	0.648	0.818182
KEGG	hsa04910	InsulinSignalling	All Except Skin Cancer	Full Data set	0.643	0.818182
KEGG	hsa04110	CellCycle	All Except Skin Cancer	Diagnosed 50 To 64	0.657	0.82125
KEGG	hsa04662	BCellReceptorSignalling	All Except Skin And Sex Cancer	Diagnosed 65 To 79	0.677	0.826456
KEGG	hsa04662	BCellReceptorSignalling	All Except Skin And Sex Cancer	Diagnosed 80 Plus	0.681	0.826456
KEGG	hsa03420	NucleotideExcisionRepair	All Except Skin Cancer	Diagnosed 80 Plus	0.675	0.826456
KEGG	hsa03420	NucleotideExcisionRepair	All Except Skin Cancer	Full Data set	0.69	0.829327
KEGG	hsa05414	DilatedCardiomyopathy	All Except Skin Cancer	Full Data set	0.711	0.846429
KEGG	hsa04910	InsulinSignalling	All Except Skin Cancer	Diagnosed 65 To 79	0.731	0.862028
KEGG	hsa03420	NucleotideExcisionRepair	All Except Skin And Sex Cancer	Diagnosed 50 To 64	0.752	0.878505
KEGG	hsa04064	NFKappaBSignalling	All Except Skin And Sex Cancer	Full Data set	0.776	0.898148
KEGG	hsa04660	TCellReceptorSignalling	All Except Skin And Sex Cancer	Diagnosed 65 To 79	0.807	0.915541
KEGG	hsa04660	TCellReceptorSignalling	All Except Skin Cancer	Diagnosed 65 To 79	0.813	0.915541
KEGG	hsa03420	NucleotideExcisionRepair	All Except Skin And Sex Cancer	Full Data set	0.805	0.915541
KEGG	hsa03460	FanconiAnemia	All Except Skin Cancer	Diagnosed 65 To 79	0.852	0.939693
KEGG	hsa04064	NFKappaBSignalling	All Except Skin Cancer	Full Data set	0.855	0.939693
KEGG	hsa04660	TCellReceptorSignalling	All Except Skin Cancer	Full Data set	0.857	0.939693
KEGG	hsa04910	InsulinSignalling	All Except Skin And Sex Cancer	Diagnosed 80 Plus	0.874	0.95
KEGG	hsa05414	DilatedCardiomyopathy	AllExceptSkinCancer	Diagnosed 50 To 64	0.892	0.952991
KEGG	hsa03460	FanconiAnemia	All Except Skin And Sex Cancer	Diagnosed 65 To 79	0.892	0.952991
KEGG	hsa04664	FcEpsilonSignalling	All Except Skin And Sex Cancer	Diagnosed 50 To 64	0.94	0.96748
KEGG	hsa04910	InsulinSignalling	All Except Skin And Sex Cancer	Diagnosed 50 To 64	0.915	0.96748
KEGG	hsa04910	InsulinSignalling	All Except Skin Cancer	Diagnosed 50 To 64	0.945	0.96748
KEGG	hsa03420	NucleotideExcisionRepair	All Except Skin And Sex Cancer	Diagnosed 65 To 79	0.936	0.96748
KEGG	hsa04662	BCellReceptorSignalling	All Except Skin Cancer	Diagnosed 65 To 79	0.94	0.96748
KEGG	hsa04068	FoxOSignalling	All Except Skin And Sex Cancer	Diagnosed 80 Plus	0.952	0.96748
KEGG	hsa04910	InsulinSignalling	AllExceptSkinCancer	Diagnosed 80 Plus	0.97	0.977823
KEGG	hsa04064	NFKappaBSignalling	All Except Skin Cancer	Diagnosed 80 Plus	0.993	0.993

## Sheet: 2g.FoxO
Supplementary Table 2g.Detailed Kaplan Meier Results for FoxO pathway that demonstrated age-dependent survival patterns
Columns B and C is the number of individuals that possessed high and low number of wild type alleles, and the (#Obs) value in the same columns is the number of observed events for each genotype in the Kaplan Meier analysis
	# High (#Obs)	# Low (#Obs)	Log Rank P Value	Adjusted Log Rank (FDR)	5 year Survival (%, 95% CI)
All Except Skin Cancer					High	Low
Full Dataset	1044 (638)	102 (75)	0.173	0.36	67.2 (64.4-70.2)	61.5 (52.7-71.8)
Aged 50-64	344 (152)	38 (24)	0.527	0.74	84.3 (80.5-88.3)	86.8 (76.7-98.3)
Aged 65-79	514 (329)	50 (38)	0.00358	0.058	66.1 (62.1-70.5)	51.3 (39.10-67.4)
Aged 80+	183 (155)	17 (15)	0.601	0.8	37.2 (30.6-45.1)	35.3 (18.5-67.2)
All Except Skin and Sex Cancer
Full Dataset	554 (402)	60 (47)	0.557	0.76	50.1 (45.9-54.4)	46.1 (35.1-60.8)
Aged 50-64	138 (89)	19 (12)	0.473	0.67	68.6 (61.2-76.8)	78.9 (62.5-99.6)
Aged 65-79	288 (203)	34 (27)	0.0344	0.19	49.6 (43.9-56.0)	37.2 (23.8-57.8)
Aged 80+	125 (109)	10 (9)	0.952	0.96	28.7 (21.5-38.2)	20.0 (5.7-69.1)
