# Supplementary material for: Identification of polymorphisms in cancer patients that differentially affect survival with age
Source: Aging (Albany NY). 2017 Oct 20;9(10):2117–36. doi: 10.18632/aging.101305 (PMC5680559; doi:10.18632/aging.101305)
Supplement: Supplementary file 3 [file aging-09-2117-s003.xlsx]

## Sheet: Index
Page Number	Page Name	Page Description
3a.	SNPs-Equal#KM	Kaplan Meier analysis using an equal number of wild type and variants for rs11574358
3b.	CohortDiff-OriginalCohort	Kaplan Meier analysis of rs11574358; Original Cohort samples only
3c.	CohortDiff-OffspringCohort	Kaplan Meier analysis of rs11574358; Offspring Cohort samples only
3d.	SexDifferences-Males	Kaplan Meier analysis of rs11574358; Male samples only
3e.	SexDifferences-Females	Kaplan Meier analysis of rs11574358; Female samples only
3f.	Numbers-CoxModel	The number of individuals with each genotype for each phenotypic trait
3g.	Snp-CoxModel	Cox Model for rs11574358; stratifying by variables: cohort, grade, comorbidity and sex; adjusting for other significant SNPs
3h.	Snp-AdjustInsteadOfStratify	Cox Model for rs11574358; adjusting for variables: cohort, grade, comorbidity and sex and other significant SNPs
3i.	Cox Model - Female samples only	Cox Model for rs11574358; stratifying by variables: cohort, grade, comorbidity and adjusting other significant SNPs; Female samples only
3j.	Cox Model - Male samples only	Cox Model for rs11574358; stratifying by variables: cohort, grade, comorbidity and adjusting other significant SNPs; Male samples only
3k.	Cox Model - Original samples only	Cox Model for rs11574358; stratifying by variables: sex, grade, comorbidity and adjusting other significant SNPs; Original cohort samples only
3l.	Cox Model - Offspring samples only	Cox Model for rs11574358; stratifying by variables: sex, grade, comorbidity and adjusting other significant SNPs; Offspring cohort samples only

## Sheet: 3a.SNP-Equal#sKM
Supplementary Table 3a1. Rs11574358: Kaplan Meier analysis using equal numbers of wild type and variant genotypes
Columns B and C are the numbers of wild type and variant genotypes in the data set. The (#Obs) number in brackets is the number of events per category
rs11574358	# Wild Type (#Obs)	# Variant (#Obs)	Log Rank P Value	Adjusted Log Rank P Value (FDR)	5 year survival rate (%, 95% CI)
					Wild Type	Variant
All Except Skin Cancer
Full Dataset	107 (106)	107 (60)	8.86e-12	1.06e-10	75.9 (68.1-84.7)	40.1(31.8-50.6)
Aged 50-64	30 (29)	30 (10)	0.0181	0.028	86.5 (75.1-99.7)	60.0 (44.8-80.4)
Aged 65-79	54 (54)	54 (34)	1.85e-07	9.87e-07	74.7 (63.6-87.7)	37.1 (26.1-52.4)
Aged 80+	23 (23)	23 (20)	0.25	0.31	39.9 (23.61-67.6)	21.7 (10.1-47.2)
All Except Skin and Sex Cancer
Full Dataset	72 (72)	72 (46)	5.68e-07	2.72e-06	63.2 (52.8-75.6)	23.6 (15.5-35.8)
Aged 50-64	15 (15)	15 (9)	6.92e-05	0.0002076	69.3 (47.9-100)	33.3 (16.3-68.2)
Aged 65-79	38 (38)	38 (29)	0.000329	0.00092	58.3 (44.1-77.0)	23.6 (13.3-41.9)
Aged 80+	19 (19)	19 (15)	0.53	0.0627	30.1 (14.86-60.9)	15.8 (5.5-44.6)
Supplementary Table 3a2. Rs11574358: Kaplan Meier analysis using a random set of 20 wild types and 20 variants for all age categories; for the all except skin cancer data set
Columns B and C are the numbers of wild type and variant genotypes in the data set. The (#Obs) number in brackets is the number of events per category.
rs11574358	# Wild Type (#Obs)	# Variant (#Obs)	Log Rank P Value	Adjusted Log Rank P Value (FDR)	5 year survival rate (%, 95% CI)
					Wild Type	Variant
All Except Skin Cancer
Full Dataset	20 (20)	20 (14)	0.272	N/A	58.0 (39.4-85.2)	30.0 (15.3-58.6)
Aged 50-64	20 (19)	20 (11)	0.00394	N/A	84.4 (69.5-100)	40.0 (23.3-68.4)
Aged 65-79	20 (20)	20 (14)	0.00241	N/A	60.6 (41.1-89.5)	25.0 (11.7-53.4)
Aged 80+	20 (20)	20 (18)	0.151	N/A	44.0 (26.6-72.8)	25.0 (11.7-48.1)

## Sheet: 3b.CohortDiff-OriginalCohort
Supplementary Table 3b: Kaplan Meier analysis of rs11574358; Original Cohort samples only
Columns B and C is the number of individuals that possessed wild type and variant genotypes, and the (#Obs) value in the same columns is the number of observed events for each genotype in the Kaplan Meier analysis
rs11574358	# Wild Type (#Obs)	# Variant (#Obs)	Log Rank P Value	Adjusted Log Rank P Value (FDR)	5 Year Survival Rate (%, 95% CI)
All Except Skin Cancer					Wild Type	Variant
Full Dataset	367 (339)	66 (66)	0.017	0.02	59.1 (54.1-64.2)	48.4 (37.8-62.2)
Aged 50-64	53 (46)	10 (10)	0.11	0.15	96.2 (91.2-100)	90.0 (73.2-100)
Aged 65-79	180 (172)	35 (35)	0.0018	0.00245	62.7 (56.1-70.2)	48.5 (34.5-68.3)
Aged 80+	134 (121)	21 (21)	0.135	0.18	38.3 (30.9-47.6)	23.8 (11.1-51.2)
All Except Skin and Sex Cancer
Full Dataset	218 (208)	40 (40)	0.0139	0.023	44.7 (38.5-51.8)	27.5 (16.6-45.5)
Aged 50-64	25 (25)	1 (1)	0.497	0.513	92.0 (81.9-100)	N/A
Aged 65-79	107 (103)	22 (22)	0.151	0.195	47.6 (39.1-58.1)	31.8 (17.2-58.7)
Aged 80+	86 (80)	17 (17)	0.661	0.67	25.9 (13.1-30.6)	17.6 (6.3-49.3)

## Sheet: 3c.CohortDiff-OffspringCohort
Supplementary Table 3c: Kaplan Meier analysis of rs11574358; Offspring Cohort samples only
Columns B and C is the number of individuals that possessed wild type and variant genotypes, and the (#Obs) value in the same columns is the number of observed events for each genotype in the Kaplan Meier analysis
rs11574358	# Wild Type (#Obs)	# Variant (#Obs)	Log Rank P Value	Adjusted Log Rank P Value (FDR)	5 Year Survival Rate (%, 95% CI)
All Except Skin Cancer					Wild Type	Variant
Full Dataset	659 (255)	41 (40)	0	0	76.5 (73.2-79.9)	26.8 (16.2-44.5)
Aged 50-64	295 (97)	20 (19)	2.22e-14	4.4e-13	85.2 (81.1-89.4)	40.0 (23.4-68.4)
Aged 65-79	324 (135)	19 (19)	3.88e-11	3.3e-10	71.6 (66.6-76.9)	15.8 (5.5-44.6)
Aged 80+	40 (23)	2 (2)	0.424	0.484	46.9 (32.8-67.0)	N/A
All Except Skin and Sex Cancer
Full Dataset	315 (160)	32 (32)	1.11e-09	7.6e-09	59.9 (54.5-65.8)	18.8 (9.1-38.6)
Aged 50-64	114 (58)	14 (14)	1.68e-05	5.76e-05	69.0 (60.9-78.1)	28.5 (12.4-65.4)
Aged 65-79	173 (85)	16 (16)	2.95e-06	1.18e-05	54.6 (47.2-63.2)	12.5 (3.4-45.7)
Aged 80+	28 (17)	2 (2)	0.424	0.484	49.5 (33.3-73.7)	N/A

## Sheet: 3d.SexDifferences-Males
Supplementary Table 3d: Kaplan Meier analysis of rs11574358; Male samples only
Columns B and C is the number of individuals that possessed wild type and variant genotypes, and the (#Obs) value in the same columns is the number of observed events for each genotype in the Kaplan Meier analysis
rs11574358	# Wild Type (#Obs)	# Variant (#Obs)	Log Rank P Value	Adjusted Log Rank P Value (FDR)	5 Year Survival Rate (%, 95% CI)
All Except Skin Cancer					Wild Type	Variant
Full Dataset	534 (323)	58 (58)	2.81e-14	4.4e-13	66.1 (62.1-70.3)	32.7 (22.6-47.4)
Aged 50-64	162 (75)	15 (15)	1.67e-06	7.2e-06	80.5 (74.5-86.9)	46.6 (27.1-80.2)
Aged 65-79	293 (178)	30 (30)	4.21e-11	3.3e-10	66.2 (60.9-72.1)	30.0 (17.3-51.8)
Aged 80+	79 (70)	13 (13)	0.193	0.623	34.6 (25.3-47.4)	23.1 (8.5-62.3)
All Except Skin and Sex Cancer
Full Dataset	309 (215)	43 (43)	6.88e-08	4.12e-07	52.1 (46.5-58.1)	20.9 (11.7-37.4)
Aged 50-64	90 (57)	10 (10)	0.000543	0.001	68.5 (59.5-78.9)	14.4 (11.6-77.3)
Aged 65-79	163 (109)	22 (22)	5.12e-05	0.0016	48.9 (41.4-57.7)	18.1 (7.49-44.1)
Aged 80+	56 (49)	11 (11)	0.93	0.93	31.9 (21.3-47.7)	9.1 (1.4-58.9)

## Sheet: 3e.SexDifferences-Female
Supplementary Table 3e: Kaplan Meier analysis of rs11574358; Female samples only
Columns B and C is the number of individuals that possessed wild type and variant genotypes, and the (#Obs) value in the same columns is the number of observed events for each genotype in the Kaplan Meier analysis
rs11574358	# Wild Type (#Obs)	# Variant (#Obs)	Log Rank P Value	Adjusted Log Rank P Value (FDR)	5 Year Survival Rate (%, 95% CI)
All Except Skin Cancer					Wild Type	Variant
Full Dataset	492 (271)	49 (48)	8.67e-06	3.2e-05	74.3 (70.5-78.3)	48.9 (36.8-65.2)
Aged 50-64	186 (68)	15 (14)	0.000426	0.007	92.9 (89.2-96.7)	73.3 (54.1-99.5)
Aged 65-79	211 (129)	24 (24)	0.00118	0.002	71.3 (65.3-77.8)	45.8 (29.6-70.8)
Aged 80+	95 (74)	10 (10)	0.0948	0.13	43.8 (30.3-50.6)	12.6 (5.7-64.2)
All Except Skin and Sex Cancer
Full Dataset	224 (153)	29 (29)	0.00072	0.001	55.2 (49.1-62.3)	27.6 (15.3-49.7)
Aged 50-64	49 (26)	5 (5)	0.00136	0.002	83.6 (73.9-94.7)	40.0 (13.6-100)
Aged 65-79	117 (79)	16 (16)	0.0534	0.07	55.8 (50.2-68.6)	31.2 (15.1-64.6)
Aged 80+	58 (48)	8 (8)	0.307	0.36	25.0 (19.3-43.9)	12.5 (2.0-78.2)

## Sheet: 3f.NumbersInCoxModel
Supplementary Table 3f. The number of each wild type and variant genotype in each of the phenotypic characterstics for each of the four SNPs in the Cox Model											Supplementary Table 3f: Number of individuals in each category for all genotypes per SNP in Cox Model.
	ss74814609 (rs1794108)											ss74821773 (rs11574358)											ss74822356 (rs317913)											ss74817808 (rs4147918)
All Except Skin Cancer	Wild Type					Variant					All Except Skin Cancer	Wild Type					Variant					All Except Skin Cancer	Wild Type					Variant					All Except Skin Cancer	Wild Type					Variant
	Full Data set	Diagnosed 50 to 64	Diagnosed 65 to 79	Diagnosed 80 Plus		Full Data set	Diagnosed 50 to 64	Diagnosed 65 To 79	Diagnosed 80 Plus			Full Data set	Diagnosed 50 to 64	Diagnosed 65 to 79	Diagnosed 80 Plus		Full Data set	Diagnosed 50 to 64	Diagnosed 65 To 79	Diagnosed 80 Plus			Full Data set	Diagnosed 50 to 64	Diagnosed 65 to 79	Diagnosed 80 Plus		Full Data set	Diagnosed 50 to 64	Diagnosed 65 To 79	Diagnosed 80 Plus			Full Data set	Diagnosed 50 to 64	Diagnosed 65 to 79	Diagnosed 80 Plus		Full Data set	Diagnosed 50 to 64	Diagnosed 65 To 79	Diagnosed 80 Plus
Cohort											Cohort											Cohort											Cohort
Original	221	32	96	93		126	21	77	28		Original	321	46	162	113		58	10	29	19		Original	213	N/A	91	87		143	N/A	86	42		Original	237	N/A	108	95		102	N/A	57	31
Offspring	604	274	290	40		4	2	2	0		Offspring	601	271	291	39		36	18	17	1		Offspring	558	N/A	277	34		79	N/A	30	5		Offspring	578	N/A	285	34		56	N/A	22	6
Sex											Sex											Sex											Sex
Male	429	139	229	61		66	11	42	13		Male	481	147	266	68		50	13	27	10		Male	400	N/A	219	55		122	N/A	70	22		Male	426	N/A	233	58		84	N/A	47	17
Female	396	167	157	72		64	12	37	15		Female	441	170	187	84		44	15	19	10		Female	371	N/A	149	66		100	N/A	46	25		Female	389	N/A	160	71		74	N/A	32	20
Number of Comorbidies											Number of Comorbidies											Number of Comorbidies											Number of Comorbidies
Low (0-2)	623	247	288	88		100	16	64	20		Low (0-2)	696	254	342	100		69	22	33	14		Low (0-2)	587	N/A	279	83		159	N/A	83	29		Low (0-2)	616	N/A	294	86		117	N/A	59	25
Medium (3-4)	171	47	80	44		27	5	14	8		Medium (3-4)	191	49	92	50		24	6	12	6		Medium (3-4)	157	N/A	73	38		54	N/A	29	16		Medium (3-4)	168	N/A	81	42		36	N/A	18	11
High (5-6)	31	12	18	1		3	2	1	0		High (5-6)	35	14	19	2		1	0	1	0		High (5-6)	27	N/A	16	0		9	N/A	4	2		High (5-6)	31	N/A	18	1		5	N/A	2	1
Grade											Grade											Grade											Grade
1 (Well differentiated)	97	37	43	17		6	2	4	0		1 (Well differentiated)	101	38	47	16		6	2	3	1		1 (Well differentiated)	87	N/A	42	16		19	N/A	8	1		1 (Well differentiated)	94	N/A	44	16		12	N/A	7	1
2 (Moderately differentiated)	220	72	117	31		25	3	16	6		2 (Moderately differentiated)	242	73	132	37		17	9	7	1		2 (Moderately differentiated)	207	N/A	110	26		45	N/A	23	12		2 (Moderately differentiated)	211	N/A	110	29		41	N/A	24	8
3 (Poorly differentiated)	230	79	115	36		32	3	24	5		3 (Poorly differentiated)	248	78	133	37		30	9	15	6		3 (Poorly differentiated)	208	N/A	103	32		66	N/A	41	10		3 (Poorly differentiated)	229	N/A	115	36		34	N/A	20	7
4 (Not differentiated)	37	14	16	7		13	3	7	3		4 (Not differentiated)	51	18	26	7		4	0	2	2		4 (Not differentiated)	39	N/A	19	7		14	N/A	7	2		4 (Not differentiated)	41	N/A	20	6		12	N/A	6	1
* Number of missing genotypes imputed with multiple imputation: Full Data set N=7, Diagnosed 50 to 64 N=17, Diagnosed 65 to 79 N = 39; Diagnosed 80 Plus N = 14.											* Number of missing genotypes imputed with multiple imputation: Full Data set N=11, Diagnosed 50 to 64 N=1, Diagnosed 65 to 79 N = 5, Diagnosed 80 Plus N = 3											* Number of missing genotypes imputed with multiple imputation: Full Data set N=34, Diagnosed 50 to 64 N=N/A, Diagnosed 65 to 79 N = 20, Diagnosed 80 N=7											* Number of missing genotypes imputed with multiple imputation: Full Data set N=54, Diagnosed 50 to 64 N=N/A, Diagnosed 65 to 79 N = 32, Diagnosed 80 Plus N=9
All Except Skin and Sex Cancer	Wild Type					Variant					All Except Skin and Sex Cancer	Wild Type					Variant					All Except Skin and Sex Cancer	Wild Type					Variant					All Except Skin and Sex Cancer	Wild Type					Variant
	Full Data set	Diagnosed 50 to 64	Diagnosed 65 To 79	Diagnosed 80 Plus		Full Data set	Diagnosed 50 to 64	Diagnosed 65 To 79	Diagnosed 80 Plus			Full Data set	Diagnosed 50 to 64	Diagnosed 65 To 79	Diagnosed 80 Plus		Full Data set	Diagnosed 50 to 64	Diagnosed 65 To 79	Diagnosed 80 Plus			Full Data set	Diagnosed 50 to 64	Diagnosed 65 To 79	Diagnosed 80 Plus		Full Data set	Diagnosed 50 to 64	Diagnosed 65 To 79	Diagnosed 80 Plus			Full Data set	Diagnosed 50 to 64	Diagnosed 65 To 79	Diagnosed 80 Plus		Full Data set	Diagnosed 50 to 64	Diagnosed 65 To 79	Diagnosed 80 Plus
Cohort											Cohort											Cohort											Cohort
Original	118	9	46	60		77	12	50	26		Original	191	22	96	73		34	1	18	15		Original	118	N/A	47	60		92	N/A	56	26		Original	133	N/A	57	73		64	N/A	35	15
Offspring	290	106	156	25		2	1	1	3		Offspring	284	102	155	27		27	12	14	1		Offspring	277	N/A	154	25		35	N/A	14	3		Offspring	288	N/A	159	27		22	N/A	9	1
Sex											Sex											Sex											Sex
Male	238	73	120	41		43	10	26	13		Male	274	80	147	47		35	8	19	8		Male	226	N/A	118	41		74	N/A	42	13		Male	241	N/A	126	47		50	N/A	26	8
Female	170	42	82	44		36	3	25	16		Female	201	44	104	53		26	5	13	8		Female	169	N/A	83	44		53	N/A	28	16		Female	180	N/A	90	53		36	N/A	18	8
Number of Comorbidies											Number of Comorbidies											Number of Comorbidies											Number of Comorbidies
Low (0-2)	311	93	155	62		64	8	43	19		Low (0-2)	363	97	196	70		46	11	23	12		Low (0-2)	303	N/A	154	62		95	N/A	55	19		Low (0-2)	323	N/A	34	70		63	N/A	165	12
Medium (3-4)	86	20	38	23		13	3	8	9		Medium (3-4)	97	23	45	29		15	2	9	4		Medium (3-4)	82	N/A	39	23		27	N/A	13	9		Medium (3-4)	86	N/A	9	29		20	N/A	42	4
High (5-6)	11	2	9	0		2	2	0	1		High (5-6)	15	4	10	1		0	0	0	0		High (5-6)	10	N/A	8	0		5	N/A	2	1		High (5-6)	12	N/A	1	1		3	N/A	9	0
Grade											Grade											Grade											Grade
1 (Well differentiated)	47	13	21	12		4	1	3	1		1 (Well differentiated)	51	14	25	12		2	0	1	1		1 (Well differentiated)	43	N/A	19	12		10	N/A	7	1		1 (Well differentiated)	46	N/A	22	12		7	N/A	4	1
2 (Moderately differentiated)	96	20	53	21		12	2	7	6		2 (Moderately differentiated)	106	20	61	25		11	5	5	1		2 (Moderately differentiated)	96	N/A	53	21		18	N/A	9	6		2 (Moderately differentiated)	95	N/A	53	25		18	N/A	10	1
3 (Poorly differentiated)	91	21	48	20		20	1	16	7		3 (Poorly differentiated)	108	20	64	24		17	5	9	3		3 (Poorly differentiated)	88	N/A	49	20		35	N/A	21	7		3 (Poorly differentiated)	96	N/A	50	24		19	N/A	13	3
4 (Not differentiated)	27	9	11	7		8	1	6	1		4 (Not differentiated)	36	11	19	6		4	0	2	2		4 (Not differentiated)	28	N/A	13	7		10	N/A	6	1		4 (Not differentiated)	32	N/A	15	6		5	N/A	4	2
* Number of missing genotypes imputed with multiple imputation: Full Data set N=56, Diagnosed 50 to 64 N=262, Diagnosed 65 to 79 N=33, Diagnosed 80 Plus N=4											* Number of missing genotypes imputed with multiple imputation: Full Data set N=7, Diagnosed 50 to 64 N=253, Diagnosed 65 to 79 N=4, Diagnosed 80 Plus N=2											* Number of missing genotypes imputed with multiple imputation: Full Data set N=21, Diagnosed 50 to 64 N=N/A, Diagnosed 65 to 79 N=15, Diagnosed 80 Plus N=4											* Number of missing genotypes imputed with multiple imputation: Full Data set N=36, Diagnosed 50 to 64 N=N/A, Diagnosed 65 to 79 N=26, Diagnosed 80 Plus N=2.

## Sheet: 3g.Snp-CoxModel
Supplementary Table 3g. Cox Model results for rs11574358; model stratified by cohort, sex and tumor grade, and adjusted for other significant SNPs from KM analysis.
The HR column indicates the hazard ratio, this is the hazard ratio of the variant with respect to the wild type; P values are obtained with the score test, and a Benjamini Hochberg FDR cut off <0.05 is deemed significant.
All Except Skin Cancer
	HR of variant (compared to risk of 1.0 for wild type) (95% CI)	Pr(>|t|)	FDR	Significant (FDR < 0.05)
Full Data set
rs11574358	1.95 (1.47-2.58)	2.83e-06	2.64133e-05	*
rs1794108	1.53 (0.97-2.40)	0.064	0.162909
rs4147918	1.03 (0.72-1.48)	0.865	0.975
rs317913	1.16 (0.88-1.52)	0.271	0.583692
Diagnosed 50 to 64
rs11574358	4.65 (2.56-8.43)	4.28608e-07	6.006e-06	*
rs1794108	7.33 (2.65-20.24)	0.000144058	0.000672	*
Diagnosed 65 to 79
rs11574358	2.81 (1.77-4.46)	3.6713e-05	0.0002569	*
rs1794108	2.44 (1.28-4.66)	0.00723588	0.02534	*
rs4147918	1.17 (0.64-2.15)	0.593891	0.952
rs317913	0.94 (0.61-1.44)	0.784769	0.975
Diagnosed 80 Plus
rs11574358	1.11 (0.56-2.17)	0.752432	0.975
rs1794108	1.72 (0.81-3.63)	0.153981	0.359333
rs4147918	1.17 (0.67-2.05)	0.572273	0.952
rs317913	1.04 (0.56-1.92)	0.888122	0.975
All Except Skin and Sex Cancer
Full Dataset
rs11574358	2.04 (1.44-2.89)	6.46422e-05	0.00036176	*
rs1794108	1.11 (0.65-1.92)	0.680114	0.952
rs4147918	1.15 (0.72-1.85)	0.530594	0.952
rs317913	1.17 (0.84-1.62)	0.346339	0.692
Diagnosed 50 to 64
rs11574358	3.10 (2.14-2.89)	1.24397e-07	3.472e-06	*
rs1794108	2.25 (1.04-1.92)	0.039255	0.122267
Diagnosed 65 to 79
rs11574358	2.04 (1.25-3.29)	0.00396049	0.01584	*
rs1794108	2.09 (1.02-4.30)	0.044192	0.12376
rs4147918	1.01 (0.53-1.94)	0.969189	0.975
rs317913	1.14 (0.64-2.00)	0.66029	0.952
Diagnosed 80 Plus
rs11574358	0.98 (0.42-2.28)	0.962107	0.975
rs1794108	1.29 (0.39-4.28)	0.672264	0.952
rs4147918	1.01 (0.49-2.08)	0.975414	0.975
rs317913	1.07 (0.45-2.52)	0.880186	0.975

## Sheet: 3h.Snp-AdjustInsteadOfStratify
Supplementary Table 3h. Cox Model results for rs11574358; SNP in WRN gene; adjust for cohort, sex, grade, comorbidity and other significant SNPs from KM analysis.
HR is the increased hazard ratio of the variant with respect to the wild type, the P values are obtained with the score test, and a Benjamini Hochberg FDR cut off <0.05 is deemed significant.
All Except Skin Cancer
	HR of variant (compared to risk of 1.0 for wild type) (95% CI)	Pr(>|t|)	FDR	Significant (FDR < 0.05)
Full Data set
rs11574358	2.26 (1.72-2.99)	6.64275e-09	9.296e-08	*
rs1794108	1.59 (1.02-2.47)	0.0390753	0.0995273
rs4147918	0.99 (0.70-1.41)	0.975422	1
rs317913	1.22 (0.92-1.60)	0.152727	0.357
Diagnosed 50 to 64
rs11574358	5.81 (3.14-10.75)	2.4987e-08	2.33333e-07	*
rs1794108	4.06 (1.86-8.88)	0.000453217	0.002114	*
rs11574358	3.05 (2.04-4.57)	1.40814e-07	9.87e-07	*
rs1794108	2.71 (1.48-4.97)	0.00142841	0.005005	*
rs4147918	1.19 (0.68-2.08)	0.529431	0.768
rs317913	0.90 (0.61-1.34)	0.608325	0.773818
Diagnosed 80 Plus
rs11574358	1.17 (0.68-2.02)	0.558556	0.768
rs1794108	1.62 (0.82-3.19)	0.168111	0.366154
rs4147918	1.38 (0.83-2.29)	0.210566	0.42
rs317913	1.00 (0.60-1.67)	0.995946	1
All Except Skin and Sex Cancer
Full Dataset
rs11574358	2.11 (1.52-2.93)	1.00935e-05	5.656e-05	*
rs1794108	1.17 (0.67-2.07)	0.562256	0.768
rs4147918	1.17 (0.75-1.83)	0.474067	0.768
rs317913	1.11 (0.77-1.59)	0.576406	0.768
Diagnosed 50 to 64
rs11574358	3.49 (2.45-4.99)	2.23358e-09	6.244e-08	*
rs1794108	2.24 (0.75-4.16)	0.013741	0.03836	*
Diagnosed 65 To 79
rs11574358	2.03 (1.33-3.09)	0.000995443	0.00398177	*
rs1794108	2.51 (1.33-4.73)	0.00498406	0.015506	*
rs4147918	1.03 (0.58-1.81)	0.920608	1
rs317913	0.90 (0.56-1.45)	0.665123	0.809715
Diagnosed 80 Plus
rs11574358	0.91 (0.49-1.73)	0.790097	0.921667
rs1794108	1.56 (0.66-3.67)	0.305898	0.5425
rs4147918	1.35 (0.76-2.41)	0.30178	0.5425
rs317913	1.01 (0.52-1.98)	0.966874	1

## Sheet: 3i.CoxModel-Females
Supplementary Table 3i. Cox Model results for rs11574358; SNP in WRN gene; model stratified by sex, grade, comorbidity and adjusted for other significant SNPs in KM analysis. Female samples only.
The HR column indicates the hazard ratio, this is the hazard ratio of the variant with respect to the wild type; P values are obtained with the score test, and a Benjamini Hochberg FDR cut off <0.05 is deemed significant.
All Except Skin Cancer
	HR of variant (compared to risk of 1.0 for wild type) (95% CI)	Pr(>|t|)	FDR	Significant (FDR < 0.05)
Full Data set
rs11574358	1.47 (1.01-2.14)	0.0453261	0.181304	*Pre-FDR Significance
rs1794108	1.82 (0.99-3.35)	0.0549338	0.194381
rs4147918	0.84 (0.53-1.35)	0.478658	0.757115
rs317913	1.31 (0.89-1.92)	0.17083	0.457371
Diagnosed 50 to 64
rs11574358	3.84 (1.37-10.73)	0.0104834	0.053582	*Pre-FDR Significance
rs1794108	3.49 (1.05-11.59)	0.0407272	0.173964
Diagnosed 65 to 79
rs11574358	2.03 (1.07-3.88)	0.0316285	0.145491	*Pre-FDR Significance
rs1794108	4.66 (1.84-11.8)	0.00137532	0.0105441	*
rs4147918	0.75 (0.32-1.73)	0.499943	0.757115
rs317913	0.83 (0.45-1.53)	0.548728	0.770137
Diagnosed 80 Plus
rs11574358	0.84 (0.32-2.25)	0.735568	0.867593
rs1794108	0.92 (0.34-2.53)	0.876925	0.948538
rs4147918	2.24 (0.98-5.09)	0.0534788	0.194381
rs317913	1.12 (0.46-2.73)	0.793078	0.904482
All Except Skin and Sex Cancer
Full Dataset
rs11574358	1.66 (0.99-2.77)	0.0530978	0.194381	*Pre-FDR Significance
rs1794108	1.46 (0.67-3.16)	0.326603	0.689315
rs4147918	1.26 (0.64-2.48)	0.496901	0.757115
rs317913	1.19 (0.68-2.06)	0.536643	0.770137
Diagnosed 50 to 64
rs11574358	3.59 (0.93-13.8)	0.0599303	0.204207
rs1794108	1.18 (0.48-2.86)	0.70315	0.851182
Diagnosed 65 to 79
rs11574358	1.35 (0.48-1.53)	0.552814	0.770137
rs1794108	4.92 (1.53-15.8)	0.00868246	0.0469874
rs4147918	0.78 (0.33-1.81)	0.560861	0.770137
rs317913	0.98 (0.34-2.77)	0.963987	0.97458
Diagnosed 80 Plus
N/A - Not enough statistical power

[truncated: 3 more sheets: 3j.CoxModel-Males, 3k.CoxModel-Original, 3l.CoxModel-Offspring]
