# Supplementary material for: Identification of polymorphisms in cancer patients that differentially affect survival with age
Source: Aging (Albany NY). 2017 Oct 20;9(10):2117–36. doi: 10.18632/aging.101305 (PMC5680559; doi:10.18632/aging.101305)
Supplement: Supplementary file 4 [file aging-09-2117-s004.xlsx]

## Sheet: Index
Page Number	Page Name	Page Description
4a.	Equal Numbers KM	Kaplan Meier analysis of GPX4; Using 20 samples per age category and genotype
4b.	SexDifferences-Males	Kaplan Meier analysis of GPX4; Male samples only
4c.	SexDifferences-Females	Kaplan Meier analysis ofGPX4; Female samples only
4d.	CohortDiff-OriginalCohort	Kaplan Meier analysis of GPX4; Original Cohort samples only
4e.	CohortDiff-OffspringCohort	Kaplan Meier analysis of GPX4; Offspring Cohort samples only
4f.	GPX4-NumbersInCoxModel	Number of individuals with each genotype (WT1_WT2, WT1_Var2, Var1_WT2, Var1_Var2) with each phenotypic characteristic.
4g.	GPX4-CoxModel	Cox Model for GPX4; stratifying by variables: cohort, grade, comorbidity status and sex; adjusting for other significant SNPs
4h.	GPX4-AdjustInsteadOfStratify	Cox Model for GPX4; adjusting for variables: cohort, grade, comorbidity status and sex and other significant SNPs
4i.	GPX4-CoxModel-MaleSamples	Cox Model for GPX4; stratifying by variables: cohort, grade and comorbidity status; adjusting for other significant SNPs; Male samples only
4j.	GPX4-CoxModel-FemaleSamples	Cox Model for GPX4; stratifying by variables: cohort, grade and comorbidity status; adjusting for other significant SNPs; Female samples only
4k.	GPX4-CoxModel-OriginalCohort	Cox Model for GPX4; stratifying by variables: sex, grade and comorbidity status; adjusting for other significant SNPs; Original cohort samples only
4l.	GPX4-CoxModel-OffspringCohort	Cox Model for GPX4; stratifying by variables: sex, grade and comorbidity status; adjusting for other significant SNPs; Offspring cohort samples only

## Sheet: 4a.EqualNumbersKM
Supplementary Table 4a.Detailed Kaplan Meier Results for GPX4 gene that demonstrated age-dependent survival patterns; using roughly equal numbers
	#WT_WT (#Obs)	#WT_Var (#Obs)	#Var_WT (#Obs)	#Var_Var (#Obs)	Log Rank P Value	Adjusted Log Rank (FDR)	5 Year Survival Rate (%, 95% CI)
							WT_WT	WT_Var	Var_WT	Var_Var
All Except Skin Cancer
Full Dataset	20 (14)	20 (13)	20 (18)	20 (14)	0.0507	0.1521	64.2 (46.0-89.6)	57.6 (38.9-85.1)	50.0 (32.2-77.5)	59.6 (41.4-85.7)
Aged 50-64	20 (8)	20 (6)	20 (8)	16 (6)	0.652	0.73	80.0 (64.3-99.6)	89.1 (75.8-100)	90.0 (77.8-100)	79.5 (61.1-100)
Aged 65-79	20 (8)	20 (11)	20 (19)	20 (17)	0.00711	0.03	65.0 (47.1-89.7)	70.0 (52.5-93.3)	55.5 (37.0-81.8)	35.0 (29.3-63.6)
Aged 80+	20 (17)	20 (15)	20 (19)	8 (8)	0.746	0.81	45.0 (27.7-73.1)	35.9 (19.2-67.3)	45.0 (27.7-73.1)	25.0 (7.5-83.0)

## Sheet: 4b.SexDifferences-Males
Supplementary Table 4b: Kaplan Meier analysis of GPX4 (Entrez ID 2879); Male samples only.
Columns C to F is the number of individuals that possessed wild type and variant genotypes, and the (#Obs) value in the same columns is the number of observed events for each genotype in the Kaplan Meier analysis
	Entrez Gene ID	#WT_WT (#Obs)	#WT_Var (#Obs)	#Var_WT (#Obs)	#Var_Var (#Obs)	Log Rank P Value	Adjusted Log Rank P Value (FDR)	5 Year Survival Rate
All Except Skin Cancer								WT_WT	WT_Var	Var_WT	Var_Var
Full Dataset	2879	247 (135)	212 (126)	52 (45)	28 (23)	0.00464	0.036	69.1 (63.4-75.3)	66.5 (60.3-73.4)	55.4 (43.3-70.8)	42.3 (27.3-65.5)
Aged 50-64	2879	73 (28)	68 (33)	11 (8)	8 (4)	0.522	0.67	81.8 (73.2-91.3)	80.5 (71.5-90.6)	72.7 (50.6-100.0)	70.0 (42.1-100)
Aged 65-79	2879	136 (74)	118 (70)	24 (21)	18 (17)	0.000402	0.007	66.7 (58.8-75.5)	67.2 (59.1-76.5)	49.1 (32.4-74.2)	27.8 (13.1-58.5)
Aged 80+	2879	38 (33)	26 (23)	17 (16)	2 (2)	0.287	0.47	33.9 (21.4-53.7)	23.2 (10.9-49.5)	35.2 (18.5-67.2)	N/A
All Except Skin and Sex Cancer
Full Dataset	2879	151 (95)	111 (77)	29 (28)	19 (17)	0.0425	0.13	58.3 (50.9-66.7)	46.8 (38.4-57.1)	44.8 (29.9-67.1)	31.6 (16.2-61.2)
Aged 50-64	2879	43 (23)	32 (21)	6 (6)	6 (4)	0.204	0.36	69.1 (56.4-84.6)	62.2 (47.4-81.6)	50.0 (22.4-100)	62.5 (32.0-100)
Aged 65-79	2879	80 (47)	60 (40)	11 (11)	12 (12)	0.00642	0.03	59.2 (48.8-71.8)	41.9 (30.4-57.6)	18.2 (5.1-63.7)	16.6 (4.7-59.1)
Aged 80+	2879	28 (25)	19 (16)	12 (11)	1 (1)	0.116	0.27	31.0 (17.6-54.4)	13.9 (3.94-49.6)	41.7 (21.3-81.4)	N/A

## Sheet: 4c.SexDifferences-Females
Supplementary Table 4c: Kaplan Meier analysis of GPX4 (Entrez ID 2879); Female samples only.
Columns C to F is the number of individuals that possessed wild type and variant genotypes, and the (#Obs) value in the same columns is the number of observed events for each genotype in the Kaplan Meier analysis
All Except Skin Cancer	Gene Name	#WT_WT (#Obs)	#WT_Var (#Obs)	#Var_WT (#Obs)	#Var_Var (#Obs)	Log Rank P Value	Adjusted Log Rank P Value (FDR)	5 Year Survival Rate (%, 95% CI)
								WT_WT	WT_Var	Var_WT	Var_Var
Full Dataset	2879	228 (124)	190 (95)	56 (43)	22 (13)	0.0169	0.06	72.2 (66.6-78.4)	78.9 (73.2-85.1)	60.7 (49.1-75.0)	66.6 (48.9-90.5)
Aged 50-64	2879	86 (34)	79 (29)	18 (8)	8 (2)	0.999	0.99	91.7 (86.1-97.8)	88.5 (81.7-95.9)	94.4 (84.4-100)	87.5 (67.3-100)
Aged 65-79	2879	97 (57)	80 (43)	23 (21)	8 (5)	0.00864	0.03	67.1 (58.2-77.3)	80.2 (71.7-89.8)	47.8 (31.2-73.3)	56.2 (28.1-100)
Aged 80+	2879	45 (33)	31 (23)	15 (14)	6 (6)	0.0804	0.22	44.4 (32.2-62.5)	50.5 (35.4-71.9)	20.0 (7.3-55.0)	33.3 (10.8-100)
All Except Skin and Sex Cancer
Full Dataset	2879	114 (75)	77 (53)	26 (22)	11 (7)	0.202	0.36	54.6 (46.1-64.8)	56.1 (46.1-68.7)	42.3 (27.1-66.3)	43.6 (21.8-87.4)
Aged 50-64	2879	26 (14)	22 (14)	3 (2)	2 (0)	0.249	0.42	84.4 (71.5-99.7)	63.6 (46.4-87.3)	N/A	N/A
Aged 65-79	2879	61 (40)	36 (23)	13 (11)	5 (3)	0.466	0.64	50.2 (38.7-65.0)	62.3 (47.9-80.9)	46.2 (25.6-83.0)	30.0 (6.3-100)
Aged 80+	2879	27 (21)	19 (16)	10 (9)	4 (4)	0.5	0.66	29.3 (15.8-54.1)	36.8 (20.5-66.4)	20.0 (5.7-69.1)	N/A

## Sheet: 4d.CohortDifferences-Original
Supplementary Table 4d: Kaplan Meier analysis of GPX4 (Entrez ID 2879); Original Cohort only.
Columns C to F is the number of individuals that possessed wild type and variant genotypes, and the (#Obs) value in the same columns is the number of observed events for each genotype in the Kaplan Meier analysis
	Gene Name	#WT_WT (#Obs)	#WT_Var (#Obs)	#Var_WT (#Obs)	#Var_Var (#Obs)	Log Rank P Value	Adjusted Log Rank P Value (FDR)	5 Year Survival Rate
All Except Skin Cancer								WT_WT	WT_Var	Var_WT	Var_Var
Full Dataset	2879	143 (128)	115 (105)	68 (67)	31 (30)	0.00606	0.03	60.1 (52.6-68.7)	69.3 (61.3-78.3)	48.5 (37.9-62.0)	48.3 (33.6-69.6)
Aged 50-64	2879	16 (13)	19 (17)	10 (9)	4 (4)	0.388	0.58	93.8 (82.6-100)	94.7 (85.2-100)	90.0 (73.0-100)	75.0 (43.0-100)
Aged 65-79	2879	64 (61)	53 (49)	32 (32)	19 (18)	0.000133	0.004	70.3 (59.9-82.4)	83.1 (73.5-93.8)	40.6 (26.7-61.8)	42.1 (24.8-71.3)
Aged 80+	2879	63 (54)	43 (39)	26 (26)	8 (8)	0.42	0.6	39.7 (26.3-50.6)	38.1 (23.8-53.6)	34.6 (20.4-58.7)	25.0 (7.53-83.0)
All Except Skin and Sex Cancer
Full Dataset	2879	82 (78)	62 (57)	41 (41)	21 (20)	0.138	0.29	40.2 (30.9-52.4)	50.0 (38.9-64.1)	39.02 (26.6-57.2)	28.5 (14.5-56.2)
Aged 50-64	2879	5 (5)	8 (8)	5 (5)	3 (3)	0.106	0.27	80.0 (51.6-100)	87.5 (67.3-100)	80.0 (51.6-100)	66.7 (29.9-100)
Aged 65-79	2879	39 (38)	22 (20)	19 (19)	13 (12)	0.00556	0.03	53.8 (40.2-72.0)	63.6 (46.4-87.3)	21.1 (8.80-50.3)	15.4 (4.3-55)
Aged 80+	2879	38 (35)	32 (29)	17 (17)	5 (5)	0.555	0.68	18.4 (9.40-36.0)	22.6 (11.8-43.4)	41.1 (23.3-72.7)	N/A

## Sheet: 4e.CohortDifferences-Offspring
Supplementary Table 4e: Kaplan Meier analysis of GPX4 (Entrez ID 2879); Offspring Cohort only.
Columns C to F is the number of individuals that possessed wild type and variant genotypes, and the (#Obs) value in the same columns is the number of observed events for each genotype in the Kaplan Meier analysis
	Gene Name	#WT_WT (#Obs)	#WT_Var (#Obs)	#Var_WT (#Obs)	#Var_Var (#Obs)	Log Rank P Value	Adjusted Log Rank P Value (FDR)	5 Year Survival Rate
All Except Skin Cancer								WT_WT	WT_Var	Var_WT	Var_Var
Full Dataset	2879	332 (131)	287 (116)	40 (21)	19 (6)	0.623	0.73	75.4 (70.8-80.3)	73.9 (68.7-79.2)	74.8 (62.4-89.6)	65.0 (45.5-92.7)
Aged 50-64	2879	143 (49)	128 (45)	19 (7)	12 (2)	0.629	0.73	85.8 (80.2-91.8)	82.6 (76.1-89.5)	84.2 (69.3-100)	83.3 (64.7-100)
Aged 65-79	2879	169 (70)	145 (64)	15 (10)	7 (4)	0.338	0.53	69.2 (62.3-76.8)	68.4 (60.9-76.7)	65.0 (44.3-95.3)	23.8 (4.49-100)
Aged 80+	2879	20 (12)	14 (7)	6 (4)	0 (0)	0.94	0.99	47.7 (28.7-79.3)	42.9 (21.7-84.6)	25.0 (5.1-100)	N/A
All Except Skin and Sex Cancer								WT_WT	WT_Var	Var_WT	Var_Var
Full Dataset	2879	183 (92)	126 (73)	14 (9)	9 (4)	0.13	0.29	62.5 (55.6-70.2)	48.3 (39.9-58.4)	57.1 (36.3-89.9)	N/A
Aged 50-64	2879	64 (32)	46 (27)	4 (3)	5 (1)	0.0314	0.11	72.9 (62.5-84.8)	56.2 (43.4-72.6)	25.0 (4.0-100)	N/A
Aged 65-79	2879	102 (49)	74 (43)	5 (3)	4 (3)	0.173	0.34	56.1 (46.7-67.4)	43.7 (33.1-57.7)	60.0 (29.3-100)	N/A
Aged 80+	2879	17 (11)	6 (3)	5 (3)	0 (0)	0.982	0.99	46.8 (26.9-81.5)	N/A	N/A	N/A

## Sheet: 4f.GPX-NumbersInCoxModel
Supplementary Table 4f. The number of individuals with each genotype (WT1_WT2, WT1_Var2, Var1_WT2, Var1_Var2) and each phenotypic characteristic (cohort, sex, comorbidities and grade) in the data set.
All Except Skin Cancer	WT1_WT2					WT1_Var2					Var1_WT2					Var1_Var2
	Full Data set	Diagnosed 50 to 64	Diagnosed 65 to 79	Diagnosed 80 Plus		Full Data set	Diagnosed 50 To 64	Diagnosed 65 To 79	Diagnosed 80 Plus		Full Data set	Diagnosed 50 to 64	Diagnosed 65 To 79	Diagnosed 80 Plus		Full Data set	Diagnosed 50 To 64	Diagnosed 65 To 79	Diagnosed 80 Plus
# Participants
Cohort
Original	130	16	58	56		102	17	48	37		60	7	31	22		25	4	15	6
Offspring	308	130	157	19		266	125	127	14		34	16	12	6		18	11	7	0
Sex
Male	227	67	127	33		194	66	106	22		45	9	21	15		25	8	15	2
Female	211	79	88	42		174	76	69	29		49	14	22	13		18	7	7	4
Number of Comorbidies
Low (0-2)	233	77	120	35		201	82	98	21		50	12	21	17		22	8	10	4
Medium (3-4)	185	62	86	35		145	49	68	28		41	10	21	10		18	5	11	2
High (5-6)	20	7	9	4		22	11	9	2		3	1	1	1		3	2	1	0
Grade
1 (Well differentiated)	54	19	24	11		39	15	19	5		8	2	5	1		3	2	1	0
2 (Moderately differentiated)	102	31	56	15		108	40	54	14		25	6	12	7		10	2	7	1
3 (Poorly differentiated)	136	43	70	22		92	34	45	13		20	3	12	5		10	4	5	1
4 (Not differentiated)	19	6	8	5		20	6	11	3		4	3	1	0		5	2	2	1
* Number of missing genotypes imputed with multiple imputation: Full Data set N=84, Diagnosed 50 to 64 N = 20, Diagnosed 65 to 79 N = 49; Diagnosed 80 Plus N=56.
All Except Skin and Sex Cancer	WT1_WT2					WT1_Var2					Var1_WT2					Var1_Var2
	Full Data set	Diagnosed 50 To 64	Diagnosed 65 To 79	Diagnosed 80 Plus		Full Data set	Diagnosed 50 To 64	Diagnosed 65 To 79	Diagnosed 80 Plus		Full Data set	Diagnosed 50 To 64	Diagnosed 65 To 79	Diagnosed 80 Plus		Full Data set	Diagnosed 50 To 64	Diagnosed 65 To 79	Diagnosed 80 Plus
# Participants
Cohort
Original	74	5	35	34		56	7	21	28		36	3	19	14		16	3	9	4
Offspring	168	58	94	16		116	46	64	6		12	3	4	5		9	5	4	0
Sex
Male	136	39	73	24		100	31	53	16		25	5	10	10		16	6	9	1
Female	106	24	56	26		72	22	32	18		23	1	13	9		9	2	4	3
Number of Comorbidies
Low (0-2)	135	33	77	25		100	32	52	1		31	5	14	12		16	4	9	3
Medium (3-4)	97	27	47	23		64	18	30	16		15	0	8	7		7	3	3	1
High (5-6)	10	3	5	2		8	3	3	2		2	1	1	0		2	1	1	0
Grade
1 (Well differentiated)	31	6	16	9		15	6	6	3		5	1	3	1		2	1	1	0
2 (Moderately differentiated)	52	13	28	11		42	7	6	10		10	0	5	4		4	2	1	1
3 (Poorly differentiated)	60	13	34	13		35	11	25	8		11	1	8	3		6	1	4	1
4 (Not differentiated)	14	4	6	4		16	5	16	3		1	7	0	0		2	0	2	0
* Number of missing genotypes imputed with multiple imputation: Full Data set N=56, Diagnosed 50 To 64: 260, Diagnosed 65 to 79 N=36, Diagnosed 80 Plus N=11

## Sheet: 4g.GPX4-CoxModel
Supplementary Table 4g. Cox Model results for GPX4.
The Cox Model results for GPX4; model stratified by cohort, comorbidity status, sex and tumor grade, and adjusted for other significant SNPs from KM analysis. HR is the increased hazard ratio of the variant with respect to the wild type, the P values are obtained with the score test, and a Benjamini Hochberg FDR cut off <0.05 is deemed significant.
All Except Skin Cancer
	HR of different allele combinations (compared to risk of 1.0 for WT_WT) (95% CI)	Pr(>|t|)	FDR	Significant (FDR<0.05)
Full Data set
Var1_Var2	0.94 (0.60-1.47)	0.770399	0.84
Var1_WT2	1.25 (0.94-1.65)	0.123973	0.48
WT1_Var2	0.96 (0.78-1.18)	0.728337	0.84
Diagnosed 50 to 64
Var1_Var2	1.06 (0.38-2.94)	0.910084	0.91
Var1_WT2	1.32 (0.54-3.22)	0.533946	0.82
WT1_Var2	1.27 (0.84-1.95)	0.259248	0.69
Diagnosed 65 to 79
Var1_Var2	1.18 (0.64-2.18)	0.583093	0.82
Var1_WT2	1.85 (1.24-2.74)	0.00236476	0.02	*
WT1_Var2	0.94 (0.70-1.27)	0.713383	0.84
Diagnosed 80 Plus
Var1_Var2	1.63 (0.52-5.18)	0.398593	0.82
Var1_WT2	1.50 (0.75-2.97)	0.244447	0.69
WT1_Var2	1.19 (0.72-1.96)	0.491532	0.82
All Except Skin And Sex Cancer
Full Data set
Var1_Var2	0.71 (0.36-1.38)	0.299803	0.72
Var1_WT2	1.30 (0.89-1.89)	0.170761	0.59
WT1_Var2	1.03 (0.76-1.38)	0.85702	0.89
Diagnosed 50 To 64
Var1_Var2	1.95 (0.99-3.85)	0.0534156	0.4
Var1_WT2	3.72 (1.83-7.61)	0.000960629	0.02	*
WT1_Var2	1.39 (0.92-2.12)	0.117156	0.48
Diagnosed 65 to 79
Var1_Var2	0.73 (0.30-1.80)	0.488217	0.81
Var1_WT2	1.66 (0.92-2.98)	0.0892315	0.48
WT1_Var2	1.07 (0.68-1.68)	0.7554	0.84
Diagnosed 80 Plus
Var1_Var2	1.67 (0.46-6.02)	0.427214	0.81
Var1_WT2	0.82 (0.37-1.85)	0.636927	0.84
WT1_Var2	0.82 (0.44-1.56)	0.555019	0.84

## Sheet: 4h.GPX4-AdjustInsteadOfStratify
Supplementary Table 4h. Cox Model results for GPX4; adjust instead of stratify, no topography; results only reported for SNPs, not for other factors (e.g. grade).
The Cox Model results for GPX4; model adjusted by cohort, sex, comorbidity status, tumor grade and other significant SNPs from KM analysis. HR is the increased hazard ratio of the variant with respect to the wild type, the P values are obtained with the score test, and a Benjamini Hochberg FDR cut off <0.05 is deemed significant.
All Except Skin Cancer	HR of different allele combinations (compared to risk of 1.0 for WT_WT) (95% CI)	Pr(>|t|)	FDR	Significant (FDR<0.05)
Full Data set
Var1_Var2	0.97 (0.60-1.58)	0.921607	0.992
Var1_WT2	1.37 (1.02-1.84)	0.0349954	0.12	*Pre-FDR Significance
WT1_Var2	0.93 (0.75-1.17)	0.560935	0.790588
Diagnosed 50 to 64
Var1_Var2	1.01 (0.38-2.74)	0.969838	0.992
Var1_WT2	1.13 (0.48-2.65)	0.769385	0.9288
WT1_Var2	1.28 (0.81-2.03)	0.295264	0.68
Diagnosed 65 to 79
Var1_Var2	1.36 (0.73-2.51)	0.328333	0.68
Var1_WT2	2.17 (1.46-3.24)	0.000149295	0.003576	*
WT1_Var2	0.89 (0.66-1.22)	0.485624	0.790588
Diagnosed 80 Plus
Var1_Var2	1.58 (0.61-4.04)	0.343134	0.68
Var1_WT2	1.53 (0.81-2.92)	0.189321	0.57
WT1_Var2	1.11 (0.72-1.71)	0.627348	0.84
All Except Skin And Sex Cancer
Full Data set
Var1_Var2	0.81 (0.44-1.47)	0.484485	0.790588
Var1_WT2	1.64 (1.07-2.51)	0.0228789	0.10992	*Pre-FDR Significance
WT1_Var2	1.09 (0.83-1.44)	0.548708	0.790588
Diagnosed 50 to 64
Var1_Var2	1.83 (1.02-3.26)	0.0403224	0.138171
Var1_WT2	4.63 (2.24-9.54)	0.000333267	0.003996	*
WT1_Var2	1.63 (1.09-2.43)	0.0165596	0.10992	*Pre-FDR Significance
Diagnosed 65 to 79
Var1_Var2	1.00 (0.49-2.02)	0.992494	0.992
Var1_WT2	2.17 (1.33-3.53)	0.00183747	0.01472	*
WT1_Var2	1.06 (0.71-1.61)	0.773502	0.9288
Diagnosed 80 Plus
Var1_Var2	1.99 (0.53-7.35)	0.292498	0.68
Var1_WT2	0.99 (0.51-1.91)	0.970904	0.992
WT1_Var2	0.85 (0.52-1.37)	0.509101	0.790588

## Sheet: 4i.GPX-Cox-Male
Supplementary Table 4i. Cox Model results for GPX4; model stratified by cohort, tumor grade, comorbidity status, and adjusted for other SNPs ; results only reported for SNPs, not for other factors (e.g. grade); Male Samples Only
HR is the increased hazard ratio of the variant with respect to the wild type, the P values are obtained with the score test, and a Benjamini Hochberg FDR cut off <0.05 is deemed significant.
All Except Skin Cancer	HR of different allele combinations (compared to risk of 1.0 for WT_WT) (95% CI)	Pr(>|t|)	FDR	Significant (FDR<0.05)
Full Data set
Var1_Var2	1.02 (0.59-1.77)	0.92033	0.953429
Var1_WT2	1.26 (0.84-1.89)	0.259713	0.805714
WT1_Var2	1.06 (0.78-1.44)	0.693292	0.90137
Diagnosed 50 to 64
Var1_Var2	1.43 (0.40-5.14)	0.577862	0.880317
Var1_WT2	2.35 (0.83-6.65)	0.107785	0.689333
WT1_Var2	1.63 (0.91-2.91)	0.100466	0.689333
Diagnosed 65 to 79
Var1_Var2	1.37 (0.68-2.74)	0.374143	0.805714
Var1_WT2	2.11 (1.18-3.81)	0.0124034	0.388533	*Pre-FDR Significance
WT1_Var2	1.05 (0.73-1.54)	0.771016	0.906824
Diagnosed 80 Plus
Var1_Var2	1.31 (0.18-9.44)	0.790137	0.906824
Var1_WT2	0.79 (0.36-1.76)	0.577805	0.880317
WT1_Var2	0.93 (0.44-1.96)	0.851441	0.92907
All Except Skin And Sex Cancer
Full Data set
Var1_Var2	0.76 (0.39-1.48)	0.418454	0.805714
Var1_WT2	1.19 (0.73-1.96)	0.469543	0.819889
WT1_Var2	1.08 (0.74-1.57)	0.694063	0.90137
Diagnosed 50 to 64
Var1_Var2	2.03 (0.99-4.19)	0.0547153	0.543491
Var1_WT2	3.57 (1.48-8.59)	0.00646173	0.388533	*Pre-FDR significance
WT1_Var2	1.13 (0.69-1.84)	0.624242	0.896615
Diagnosed 65 to 79
Var1_Var2	0.81 (0.26-2.55)	0.699656	0.90137
Var1_WT2	2.08 (0.96-4.52)	0.0635658	0.543491
WT1_Var2	1.16 (0.67-2.01)	0.581658	0.880317
Diagnosed 80 Plus
Var1_Var2	0.62 (0.03-10.24)	0.731291	0.906824
Var1_WT2	0.21 (0.05-0.69)	0.011287	0.388533
WT1_Var2	0.47 (0.17-1.27)	0.135152	0.774118

[truncated: 3 more sheets: 4j.GPX-Cox-Female, 4k.GPX-Cox-Original, 4l-GPX-Cox-Offspring]
