# Supplementary material for: Identification of polymorphisms in cancer patients that differentially affect survival with age
Source: Aging (Albany NY). 2017 Oct 20;9(10):2117–36. doi: 10.18632/aging.101305 (PMC5680559; doi:10.18632/aging.101305)
Supplement: Supplementary file 5 [file aging-09-2117-s005.xlsx]

## Sheet: Index
Page Number	Page Name	Page Description
5a.	KM-EqualNumbers	Kaplan Meier Analysis of SIRT3; 20 samples per genotype category
5b.	CohortDiff-OriginalCohort	Kaplan Meier analysis of SIRT3; Original Cohort samples only
5c.	CohortDiff-OffspringCohort	Kaplan Meier analysis of SIRT3; Offspring Cohort samples only
5d.	SexDifferences-Males	Kaplan Meier analysis of SIRT3; Male samples only
5e.	SexDifferences-Females	Kaplan Meier analysis of SIRT3; Female samples only
5f.	SIRT3-CoxModelNumbers	Number of individuals with each genotype (Low, medium and high number of wild type alleles) with each phenotypic characteristic.
5g.	SIRT3-CoxModel	Cox Model for SIRT3; stratifying by variables: cohort, comorbidity status, grade and sex; adjusting for other significant SNPs
5h.	SIRT3-AdjustInsteadOfStratify	Cox Model for SIRT3; adjusting for variables: cohort, comorbidity status, grade and sex and other significant SNPs
5i.	SIRT3-CoxModel,MaleSamples	Cox Model for SIRT3, stratifiying for variables: cohort, comorbidity status and grade; Male Samples only
5j.	SIRT3-CoxModel,FemaleSamples	Cox Model for SIRT3, stratifiying for variables: cohort, comorbidity status and grade; Female Samples only
5k.	SIRT3-CoxModel,OriginalCohort	Cox Model for SIRT3, stratifiying for variables: sex, comorbidity status and grade; Original Cohort samples only
5l.	SIRT3-CoxModel,OffspringCohort	Cox Model for SIRT3, stratifiying for variables: sex, comorbidity status and grade; Offspring Cohort samples only

## Sheet: 5a.KM-EqualNumbers
Supplementary Table 5a.Detailed Kaplan Meier Results for SIRT3 gene that demonstrated age-dependent survival patterns; using equal numbers
All Except Skin Cancer	# High (#Obs)	# Low (#Obs)	# Medium (#Obs)	Log Rank P Value	Adjusted Log Rank (FDR)	Genotype Category
						Low	Medium	High
Full Dataset	20 (11)	20 (15)	20 (14)	0.0769	N/A	52.8 (34.5-80.7)	75.0 (58.2-96.6)	55.4 (36.0-85.1)
Aged 50-64	20 (6)	20 (9)	20 (7)	0.317	N/A	85.7 (69.2-100)	83.5 (68.0-100)	79.3 (63.1-99.7)
Aged 65-79	20 (10)	20 (18)	20 (13)	0.09	N/A	48.4 (30.53-76.9)	62.4 (43.5-89.5)	67.7 (49.4-92.8)
Aged 80+	20 (17)	20 (16)	20 (17)	0.263	-	46.1 (28.0-75.8)	33.7 (17.6-64.6)	32.0 (26.5-61.8)

## Sheet: 5b.CohortDiff-Original
Supplementary Table 5b: Kaplan Meier analysis of SIRT3; Original Cohort samples only.
Columns C to E is the number of individuals that possessed wild type and variant genotypes, and the (#Obs) value in the same columns is the number of observed events for each genotype in the Kaplan Meier analysis
	Gene Name	# High (# Obs Events)	# Low (#Obs Events)	# Medium (#Obs Events)	Log Rank P Value	Adjusted Log Rank P Value (FDR)	5 Year Survival Rate
All Except Skin Cancer							High	Medium	Low
Full Dataset	23410	203 (180)	59 (58)	117 (113)	0.0127	0.03	62.1 (55.7-69.1)	60.3 (52.1-69.9)	54.2 (42.9-68.6)
Aged 50-64	23410	27 (22)	8 (8)	23 (21)	0.000193	0.0011	>88.8 (77.8-100)	91.3 (80.4-100)	87.5 (67.3-100)
Aged 65-79	23410	88 (80)	30 (30)	62 (62)	0.000979	0.003	73.8 (65.2-83.6)	56.5 (45.4-70.2)	46.7 (31.8-68.4)
Aged 80+	23410	88 (78)	21 (20)	32 (30)	0.47	0.62	38.6 (29.6-50.3)	38.7 (24.9-60.4)	42.8 (26.1-70.2)
All Except Skin and Sex Cancer
Full Dataset	23410	117 (109)	39 (39)	60 (58)	0.0374	0.08	49.5 (41.2-59.5)	37.3 (26.8-52.0)	43.5 (30.5-62.3)
Aged 50-64	23410	12 (12)	6 (6)	6 (6)	0.0479	0.1	83.3 (64.7-100)	83.3 (58.2-100)	83.3 (58.2-100)
Aged 65-79	23410	47 (43)	21 (21)	33 (33)	0.0007	0.002	61.7 (49.2-77.3)	30.3 (18.1-50.8)	38.1 (22.1-65.7)
Aged 80+	23410	58 (54)	12 (12)	21 (19)	0.389	0.54	29.31 (19.6-43.7)	30.1 (15.4-58.8)	16.6 (4.7-59.1)

## Sheet: 5c.CohortDiff-Offspring
Supplementary Table 5c: Kaplan Meier analysis of SIRT3; Offspring Cohort samples only.
Columns C to E is the number of individuals that possessed wild type and variant genotypes, and the (#Obs) value in the same columns is the number of observed events for each genotype in the Kaplan Meier analysis
	Gene Name	# High (#Obs)	# Low (#Obs)	# Medium (#Obs)	Log Rank P Value	Adjusted Log Rank P Value		5 Year Survival Rate (%, 95% CI)
All Except Skin Cancer								High	Medium	Low
Full Dataset	23410	443 (163)	47 (23)	168 (75)	0.00586	0.015		77.7 (73.8-81.8)	69.9 (63.1-77.4)	67.9 (55.2-83.4)
Aged 50-64	23410	207 (68)	23 (6)	65 (23)	0.892	0.91		83.4 (78.5-88.7)	85.7 (77.5-94.8)	90.2 (78.2-100)
Aged 65-79	23410	210 (79)	21 (17)	90 (43)	1.44e-05	0.0001		74.8 (68.8-81.2)	64.8 (55.4-75.9)	39.6 (22.8-68.9)
Aged 80+	23410	26 (16)	3 (0)	13 (9)	0.125	0.21		51.0 (34.3-75.7)	19.0 (5.5-65.7)	N/A
All Except Skin and Sex Cancer								High	Medium	Low
Full Dataset	23410	213 (106)	24 (16)	84 (47)	0.0913	0.16		62.9 (56.7-69.7)	53.6 (43.9-65.4)	45.8 (29.7-70.8)
Aged 50-64	23410	84 (45)	6 (2)	27 (14)	0.498	0.61		61.9 (52.3-73.2)	68.7 (52.8-89.4)	83.3 (58.3-100)
Aged 65-79	23410	112 (49)	15 (14)	47 (26)	8.83e-05	0.0007		61.7 (52.7-72.3)	43.4 (30.9-61.1)	15.0 (4.22-53.4)
Aged 80+	23410	17 (12)	3 (0)	10 (7)	0.165	0.25		41.6 (22.4-77.0)	24.0 (7.32-78.6)	N/A

## Sheet: 5d.SexDifferences-Male
Supplementary Table 5d: Kaplan Meier analysis of SIRT3; Male samples only.
Columns C to E is the number of individuals that possessed wild type and variant genotypes, and the (#Obs) value in the same columns is the number of observed events for each genotype in the Kaplan Meier analysis
	Gene Name	# High (#Obs)	# Low (#Obs)	# Medium (#Obs)	Log Rank P Value	Adjusted Log Rank P Value (FDR)	5 Year Survival Rate
All Except Skin Cancer							High	Medium	Low
Full Dataset	23410	339 (197)	53 (40)	148 (95)	0.0209	0.047	67.7 (62.8-73.0)	61.1 (53.4-69.7)	57.3 (45.1-72.6)
Aged 50-64	23410	107 (52)	18 (8)	37 (15)	0.68	0.75	76.4 (68.6-84.9)	85.8 (74.9-98.2)	77.0 (56.8-100)
Aged 65-79	23410	175 (92)	28 (27)	89 (61)	1.7e-05	0.0002	73.1 (66.6-80.3)	58.1 (48.5-69.6)	38.1 (23.5-61.6)
Aged 80+	23410	57 (53)	7 (5)	22 (19)	0.666	0.75	35.1 (24.7-50.4)	30.0 (15.3-58.6)	38.1 (13.7-100)
All Except Skin and Sex Cancer
Full Dataset	23410	192 (129)	36 (32)	86 (61)	0.152	0.24	53.6 (46.7-61.5)	45.1 (35.5-57.4)	43.6 (29.9-63.5)
Aged 50-64	23410	62 (41)	8 (6)	21 (11)	0.501	0.62	59.7 (49.6-73.2)	74.5 (57.3-96.7)	87.5 (67.3-100)
Aged 65-79	23410	90 (51)	21 (21)	49 (36)	0.000402	0.002	58.4 (48.3-70.6)	36.4 (24.9-53.3)	28.5 (14.5-56.2)
Aged 80+	23410	40 (37)	7 (5)	16 (14)	0.862	0.91	32.5 (20.7-51.5)	26.6 (1..5-61.7)	38.1 (13.7-100)

## Sheet: 5e.SexDifferences-Female
Supplementary Table 5e: Kaplan Meier analysis of SIRT3; Female samples only.
Columns C to E is the number of individuals that possessed wild type and variant genotypes, and the (#Obs) value in the same columns is the number of observed events for each genotype in the Kaplan Meier analysis
	Gene Name	# High (#Obs)	# Low (#Obs)	# Medium (#Obs)	Log Rank P Value	Adjusted Log Rank P Value (FDR)	5 Year Survival Rate (%, 95% CI)
All Except Skin Cancer							High	Medium	Low
Full Dataset	23410	307 (146)	53 (41)	137 (93)	1.22e-06	4e-05	77.8 (73.2-82.7)	71.1 (63.7-79.2)	63.1 (51.1-77.8)
Aged 50-64	23410	127 (38)	13 (6)	51 (29)	0.0729	0.14	92.8 (88.5-97.5)	88.2 (79.8-97.5)	91.7 (77.3-100)
Aged 65-79	23410	123 (67)	23 (20)	63 (44)	0.000245	0.0014	76.4 (69.2-84.5)	65.7 (54.7-78.8)	51.3 (34.1-76.8)
Aged 80+	23410	57 (41)	17 (15)	23 (20)	0.248	0.36	44.8 (33.4-60.0)	36.8 (21.1-64.2)	50.2 (30.8-81.8)
All Except Skin and Sex Cancer							High	Medium	Low
Full Dataset	23410	138 (86)	27 (23)	58 (44)	0.00554	0.016	60.7 (53.1-69.6)	44.9 (33.5-60.2)	37.00 (22.1-62.0)
Aged 50-64	23410	34 (16)	4 (2)	12 (9)	0.91	0.91	79.4 (66.9-94.2)	75.0 (54.1-100)	N/A
Aged 65-79	23410	69 (41)	15 (14)	31 (23)	0.00103	0.0032	65.1 (54.5-77.8)	20.7 (6.7-63.5)	31.1 (14.2-68.1)
Aged 80+	23410	35 (29)	8 (7)	15 (12)	0.545	0.64	34.4 (21.6-54.2)	20.7 (6.7-63.5)	14.6 (2.3-89.0)

## Sheet: 5f.CoxModel-Numbers
Supplementary Table 5f. The number of individuals with each genotype (Low, Medium and High number of wild type alleles) and each phenotypic characteristic (cohort, sex, comorbidities and grade) in the data set.
All Except Skin Cancer	High					Medium					Low
	Full Data set	Diagnosed 50 To 64	Diagnosed 65 to 79	Diagnosed 80 Plus		Full Data set	Diagnosed 50 To 64	Diagnosed 65 To 79	Diagnosed 80 Plus		Full Data set	Diagnosed 50 To 64	Diagnosed 65 To 79	Diagnosed 80 Plus
# Participants
Cohort
Original	180	25	79	76		99	20	53	26		52	6	29	14
Offspring	414	195	193	26		147	57	79	11		41	21	17	3
Sex
Male	306	100	159	47		130	32	79	19		47	16	25	6
Female	288	120	113	55		116	45	53	18		46	11	21	14
Number of Comorbidies
Low (0-2)	310	122	142	46		145	41	80	24		47	15	26	6
Medium (3-4)	249	82	115	52		92	32	48	12		42	11	19	12
High (5-6)	35	16	15	4		9	4	4	1		4	1	1	2
Grade
1 (Well differentiated)	72	29	32	11		23	7	10	6		5	1	4	0
2 (Moderately differentiated)	157	48	81	28		65	20	41	4		18	7	6	5
3 (Poorly differentiated)	155	53	79	23		80	20	47	13		23	8	10	5
4 (Not differentiated)	27	8	12	7		16	9	6	1		6	0	4	2
* Number of individuals with missing data imputed with multiple imputation: Full Data set N=94, Diagnosed 50 to 64 N = 22, Diagnosed 65 to 79 N = 54, Diagnosed 80 Plus = 16
All Except Skin and Sex Cancer	High					Medium					Low
	Full Data set	Diagnosed 50 To 64	Diagnosed 65 To 79	Diagnosed 80 Plus		Full Data set	Diagnosed 50 To 64	Diagnosed 65 To 79	Diagnosed 80 Plus		Full Data set	Diagnosed 50 To 64	Diagnosed 65 To 79	Diagnosed 80 Plus
# Participants
Cohort
Original	101	11	41	49		49	4	27	18		35	5	20	10
Offspring	199	80	102	17		70	21	41	8		20	5	12	3
Sex
Male	168	58	78	32		73	17	43	13		31	6	19	6
Female	132	33	65	34		46	8	25	13		24	4	13	7
Number of Comorbidies
Low (0-2)	166	53	83	30		81	13	49	19		29	5	19	5
Medium (3-4)	118	32	53	33		34	11	17	6		24	4	12	8
High (5-6)	16	6	7	3		4	1	2	1		2	1	1	0
Grade
1 (Well differentiated)	38	13	18	7		9	0	3	6		3	1	2	0
2 (Moderately differentiated)	70	14	35	21		28	6	19	3		7	2	3	2
3 (Poorly differentiated)	61	15	33	13		32	4	20	8		15	3	8	4
4 (Not differentiated)	19	6	7	6		11	4	6	1		5	0	4	1
* Number of missing genotypes imputed with multiple imputation: Full Data set N=56, Diagnosed 50 to 64 = 264, Diagnosed 65 to 79 N=14

## Sheet: 5g.SIRT3-CoxModel
Supplementary Table 5g. Cox Model results for SIRT3
The Cox Model results for SIRT3; model stratified by cohort, sex, comorbidity status and tumor grade, and adjusted for other significant SNPs from KM analysis. HR is the increased hazard ratio of the variant with respect to the wild type, the P values are obtained with the score test, and a Benjamini Hochberg FDR cut off <0.05 is deemed significant.
	HR of possessing a low or medium # WT alleles (compared to risk of 1.0 for High) (95% CI)	Pr(>|t|)	FDR	Significant (FDR < 0.05)
All Except Skin Cancer
Full Data set
Low	1.49 (1.06-2.03)	0.0203581	0.09	*Marginal
Medium	1.02 (0.82-1.26)	0.849622	0.9
Diagnosed 50 to 64
Low	1.23 (0.59-2.56)	0.574926	0.81
Medium	0.85 (0.52-1.39)	0.519852	0.81
Diagnosed 65 to 79
Low	1.98 (1.21-3.21)	0.00770995	0.06	*Marginal
Medium	1.42 (1.05-1.93)	0.0230541	0.09
Diagnosed 80 Plus
Low	1.02 (0.51-2.01)	0.957051	0.96
Medium	1.09 (0.65-1.83)	0.743378	0.88
All Except Skin And Sex Cancer
Full Data set
Low	1.25 (0.81-1.93)	0.29	0.66
Medium	1.09 (0.83-1.44)	0.55	0.81
Diagnosed 50 to 64
Low	1.19 (0.73-1.93)	0.478189	0.81
Medium	0.75 (0.47-1.18)	0.223498	0.58
Diagnosed 65 to 79
Low	2.03 (1.26-3.26)	0.00364481	0.049	*
Medium	1.62 (0.99-2.65)	0.0532368	0.17
Diagnosed 80 Plus
Low	0.91 (0.36-1.79)	0.61	0.81
Medium	0.90 (0.45-1.78)	0.77	0.88

## Sheet: 5h.SIRT3-AdjustInsteOfStratify
Supplementary Table 5h. Cox Model results for SIRT3; adjust instead of stratify, no topography; results only reported for SNPs, not for other factors (e.g. grade).
The Cox Model results for SIRT3; model adjusted by cohort, sex, comorbidity status, tumor grade and other significant SNPs from KM analysis. HR is the increased hazard ratio of the variant with respect to the wild type, the P values are obtained with the score test, and a Benjamini Hochberg FDR cut off <0.05 is deemed significant.
All Except Skin Cancer	HR of possessing a low or medium # WT alleles (compared to risk of 1.0 for High) (95% CI)	Pr(>|t|)	FDR	Significant (FDR < 0.05)
Full Data set
Low	1.67 (1.22-2.27)	0.00153189	0.00816	*
Medium	1.12 (0.88-1.40)	0.344023	0.611556
Diagnosed 50 to 64
Low	1.76 (0.84-3.71)	0.136916	0.28
Medium	0.88 (0.52-1.51)	0.659162	0.788571
Diagnosed 65 to 79
Low	2.38 (1.34-4.25)	0.00566122	0.04	*
Medium	1.69 (1.25-2.27)	0.00068713	0	*
Diagnosed 80 Plus
Low	1.07 (0.59-1.94)	0.805379	0.81
Medium	1.16 (0.72-1.88)	0.537011	0.785455
All Except Skin And Sex Cancer
Full Data set
Low	1.34 (0.93-1.93)	0.107735	0.251429
Medium	1.1 (0.82-1.47)	0.514247	0.785455
Diagnosed 50 to 64
Low	1.10 (0.67-1.79)	0.69336	0.788571
Medium	0.68 (0.43-1.08)	0.104699	0.251429
Diagnosed 65 to 79
Low	2.52 (1.59-3.99)	9.98586e-05	0	*
Medium	1.71 (1.07-2.72)	0.024208	0.064	*Marginal
Diagnosed 80 Plus
Low	0.91 (0.47-1.77)	0.796869	0.81
Medium	0.88 (0.51-1.53)	0.661119	0.788571

## Sheet: 5i.CoxModel-Males
Supplementary Table 5i. Cox Model results for SIRT3; no topography; results only reported for SNPs, not for other factors (e.g. grade); Male samples only
The Cox Model results for SIRT3; model stratified by cohort, comorbidity status, tumor grade and other significant SNPs from KM analysis. HR is the increased hazard ratio of the variant with respect to the wild type, the P values are obtained with the score test, and a Benjamini Hochberg FDR cut off <0.05 is deemed significant.
All Except Skin Cancer	HR of possessing a low or medium # WT alleles (compared to risk of 1.0 for High) (95% CI)	Pr(>|t|)	FDR	Significant (FDR < 0.05)
Full Data set
Low	1.10 (0.69-1.75)	0.672629	0.96
Medium	1.03 (0.77-1.39)	0.82548	0.98
Diagnosed 50 to 64
Low	0.87 (0.30-2.51)	0.790536	0.97
Medium	0.60 (0.28-1.29)	0.186131	0.52
Diagnosed 65 to 79
Low	1.75 (1.05-2.91)	0.0323937	0.2	*Pre-FDR Significance
Medium	1.59 (1.07-2.35)	0.0216073	0.2	*Pre-FDR Significance
Diagnosed 80 Plus
Low	1.20 (0.47-3.04)	0.700966	0.957447
Medium	1.03 (0.50-2.12)	0.934743	0.976271
All Except Skin And Sex Cancer
Full Data set
Low	0.95 (0.61-1.55)	0.91763	0.976271
Medium	0.94 (0.64-1.36)	0.748983	0.957447
Diagnosed 50 to 64
Low	1.34 (0.80-2.25)	0.260723	0.54
Medium	1.03 (0.58-1.83)	0.901062	0.976271
Diagnosed 65 to 79
Low	1.51 (0.79-2.84)	0.211069	0.525
Medium	1.64 (0.92-2.91)	0.0895257	0.36
Diagnosed 80 Plus
Low	0.74 (0.22-2.50)	0.637697	0.957143
Medium	0.66 (0.21-2.02)	0.464154	0.829412

[truncated: 3 more sheets: 5j.CoxModel-Females, 5k.CoxModel-Original, 5l.CoxModel-Offspring]
