# Supplementary material for: Identification of polymorphisms in cancer patients that differentially affect survival with age
Source: Aging (Albany NY). 2017 Oct 20;9(10):2117–36. doi: 10.18632/aging.101305 (PMC5680559; doi:10.18632/aging.101305)
Supplement: Supplementary file 6 [file aging-09-2117-s006.xlsx]

## Sheet: Index
Page Number	Page Name	Page Description
6a.	GenesAssignedToFoxO	List of 29 Entrez genes assigned to the FoxO pathway
6b.	SNPsAssignedToFoxO	List of 108 SNPs assigned to the 29 genes of the FoxO pathway
6c.	FoxO-KM-EqualNumbers	Kaplan Meier analysis of FoxO pathway;Equal Number of samples per genotype
6d.	CohortDiff-OriginalCohort	Kaplan Meier analysis of FoxO pathway; Original Cohort samples only
6e.	CohortDiff-OffspringCohort	Kaplan Meier analysis of FoxO pathway: Offspring Cohort samples only
6f.	SexDifferences-Males	Kaplan Meier analysis of FoxO pathway; Male samples only
6g.	SexDifferences-Females	Kaplan Meier analysis of FoxO pathway; Female samples only
6h.	Foxo-CoxModelNumbers	Numbers of each genotype (low and high number of wild type alleles) with each of the phenotypic characteristics.
6i.	FoxO-CoxModel	Cox Model for FoxO pathway; stratifying by variables: cohort, comorbidity status, grade and sex; adjusting for other significant SNPs
6j.	FoxO-AdjustInsteadOfStratify	Cox Model for FoxO pathway; adjusting for variables: cohort, grade, comorbidity status and sex and other significant SNPs
6k.	FoxO-MaleSamples	Cox Model for FoxO pathway, stratifying by variables: cohort, comorbidity status, grade, adjusting for other significant SNPs; Male Samples only
6l.	FoxO-FemaleSamples	Cox Model for FoxO pathway, stratifying by variables: cohort, comorbidity status, grade, adjusting for other significant SNPs; Female Samples only
6m.	FoxO-OriginalCohort	Cox Model for FoxO pathway, stratifying by variables: sex, comorbidity status, grade, adjusting for other significant SNPs; Original Cohort Samples only
6n.	FoxO-OffspringCohort	Cox Model for FoxO pathway, stratifying by variables: sex, comorbidity status, grade, adjusting for other significant SNPs; Offspring Cohort Samples only

## Sheet: 6a.GenesAssignedToFoxO
Supplementary Table 6a. List of 29 human Entrez genes assigned to the FoxO pathway
Entrez ID	Associated Gene Name
472	ATM
847	CAT
1026	CDKN1A
1030	CDKN2B
1387	CREBBP
1432	MAPK14
1454	CSNK1E
1950	EGF
1956	EGFR
2033	EP300
2308	FOXO1
2309	FOXO3
2885	GRB2
3480	IGF1R
3569	IL6
3575	IL7R
3630	INS
3643	INSR
3667	IRS1
5105	PCK1
5290	PIK3CA
5291	PIK3CB
5295	PIK3R1
5599	MAPK8
5601	MAPK9
5728	PTEN
6648	SOD2
7040	TGFB1
8660	IRS2

## Sheet: 6b.SNPsAssignedToFoxo
Supplementary Table 6b. List of 108 SNPs assigned to the 29 genes of the FoxO pathway.
rs #
rs2161120
rs40419
rs830557
rs863818
rs831122
rs4855094
rs7645550
rs2230461
rs10804876
rs10513055
rs641320
rs135711
rs12656368
rs761779
rs9480865
rs9480866
rs13207511
rs12865518
rs1234225
rs2299939
rs11202596
rs9457688
rs2070661
rs1800057
rs1801516
rs4542691
rs3744231
rs1494558
rs3194051
rs1445898
rs860416
rs12521860
rs1494555
rs5995990
rs7510675
rs2057070
rs3217992
rs8181047
rs495490
rs9808108
rs7175387
rs11634874
rs1007212
rs2684787
rs8030950
rs1319859
rs4966022
rs10794486
rs2302535
rs2041646
rs3800827
rs1024748
rs9649847
rs3813826
rs11569017
rs764205
rs6816508
rs4698803
rs11568943
rs2237051
rs17320841
rs6510949
rs2914567
rs11668751
rs2967646
rs17253937
rs10408844
rs10413734
rs3786680
rs6123711
rs2073145
rs6092495
rs2071023
rs2902993
rs11552145
rs728064
rs6025606
rs1804160
rs6025617
rs4811888
rs6070187
rs707555
rs480575
rs10807170
rs10456443
rs1864750
rs1977172
rs17713154
rs17707331
rs743923
rs612556
rs11101340
rs10857584
rs10226383
rs10229457
rs10256620
rs4773094
rs7997595
rs12429603
rs4771644
rs11841502
rs11843936
rs12584136
rs9515118
rs7396243
rs12444804
rs1635404
rs10853751

## Sheet: 6c.FoxO-KM-EqualNumbers
Supplementary Table 6c.Detailed Kaplan Meier Results for FoxO pathway that demonstrated age-dependent survival patterns; Equal numbers per genotype
	# High (#Obs)	# Low (#Obs)	Log Rank P Value	Adjusted Log Rank (FDR)	5 year Survival (%, 95% CI)
All Except Skin Cancer					High	Low
Full Dataset	20 (16)	20 (11)	0.103	-	51.0 (32.4-80.2)	35.0 (19.3-63.6)
Aged 50-64	20 (8)	20 (14)	0.645	-	68.6 (50.5-93.1)	84.7 (70.1-100)
Aged 65-79	20 (13)	20 (16)	0.255	-	56.1 (37.2-84.6)	45.0 (27.7-73.1)
Aged 80+	20 (17)	17 (15)	0.03	-	35.3 (18.5-67.2)	5.9 (0.8-39.3)

## Sheet: 6d.FoxO-OriginalCohort
Supplementary Table 6d: Kaplan Meier analysis of FoxO pathway; Original Cohort samples only.
Columns B and C is the number of individuals that possessed wild type and variant genotypes, and the (#Obs) value in the same columns is the number of observed events for each genotype in the Kaplan Meier analysis
	# High (# Obs Events)	# Low (# Obs Events)	Log Rank P Value	Adjusted Log Rank P Value (FDR)	5 Year Survival Rate (%, 95% CI)
All Except Skin Cancer					High	Low
Full Dataset	384 (356)	58 (58)	0.214	0.712727	57.5 (52.9-69.2)	51.7 (40.3-66.3)
Aged 50-64	51 (44)	13 (13)	0.225	0.712727	>96.1 (90.1-100)	>92.3 (78.9-100)
Aged 65-79	189 (181)	31 (31)	0.000325	0.0104	62.9 (56.4-70.2)	41.9 (27.7-63.5)
Aged 80+	143 (130)	15 (15)	0.216	0.712727	36.6 (29.5-45.5)	26.6 (11.5-61.7)
All Except Skin and Sex Cancer
Full Dataset	228 (218)	37 (37)	0.551	0.812308	42.7 (36.7-49.7)	37.8 (25.1-57.2)
Aged 50-64	20 (20)	7 (7)	0.895	0.928	>90 (77.7-100)	>85.7 (63.4-100)
Aged 65-79	111 (107)	22 (22)	0.00151	0.02416	48.6 (40.1-58.9)	11.1 (1.7-70.5)
Aged 80+	96 (90)	9 (9)	0.617	0.812308	25.2 (17.9-35.7)	11.1 (1.70-70.5)

## Sheet: 6e.FoxO-OffspringCohort
Supplementary Table 6e: Kaplan Meier analysis of FoxO pathway; Offspring Cohort samples only.
Columns B and C is the number of individuals that possessed wild type and variant genotypes, and the (#Obs) value in the same columns is the number of observed events for each genotype in the Kaplan Meier analysis
	# High (# Obs Events)	# Low (# Obs Events)	Log Rank P Value	Adjusted Log Rank P Value (FDR)	5 Year Survival Rate (%, 95% CI)
All Except Skin Cancer					High	Low
Full Dataset	660 (282)	44 (17)	0.477	0.803368	73.1 (69.6-76.6)	74.7 (62.8-88.8)
Aged 50-64	293 (108)	25 (11)	0.699	0.828444	81.9 (77.6-86.5)	80.0 (65.8-97.3)
Aged 65-79	325 (148)	19 (7)	0.612	0.812308	68.0 (62.9-73.5)	68.0 (49.8-92.8)
Aged 80+	40 (25)	2 (0)	0.115	0.666667	50.5 (26.8-61.1))	N/A
All Except Skin and Sex Cancer
Full Dataset	326 (184)	23 (10)	0.416	0.803368	55.5 (50.1-61.4)	60.3 (43.1-84.3)
Aged 50-64	118 (69)	12 (5)	0.631	0.812308	64.1 (55.9-73.4)	66.7 (44.7-99.5)
Aged 65-79	177 (96)	12 (5)	0.475	0.803368	50.2 (42.9-58.8)	N/A
Aged 80+	29 (19)	1 (0)	0.216	0.712727	42.7 (20.1-67.4)	N/A

## Sheet: 6f.FoxO-Male
Supplementary Table 6f: Kaplan Meier analysis of FoxO pathway; Male samples only.
Columns B and C is the number of individuals that possessed wild type and variant genotypes, and the (#Obs) value in the same columns is the number of observed events for each genotype in the Kaplan Meier analysis
	# High (#Obs Events)	# Low (#Obs Events)	Log Rank P Value	Adjusted Log Rank P Value (FDR)	5 Year Survival Rate (%, 95% CI)
All Except Skin Cancer					High	Low
Full Dataset	551 (353)	49 (36)	0.328	0.803368	62.3 (58.6-66.9)	58.5 (46.1-74.3)
Aged 50-64	161 (80)	17 (11)	0.557	0.812308	77.1 (70.8-85.8)	82.4 (66.1-100)
Aged 65-79	299 (192)	29 (21)	0.125	0.666667	63.2 (57.8-69.1)	54.0 (38.3-75.9)
Aged 80+	88 (79)	6 (6)	0.458	0.803368	33.4 (24.6-45.3)	16.7 (2.7-99.7)
All Except Skin and Sex Cancer					High	Low
Full Dataset	327 (238)	30 (25)	0.377	0.803368	48.4 (43.1-54.4)	45.4 (30.4-67.7)
Aged 50-64	91 (61)	10 (7)	0.919	0.928	63.3 (54.1-74.1)	68.6 (44.5-100)
Aged 65-79	170 (120)	18 (14)	0.362	0.803368	46.3 (39.1-55.0)	36.1 (19.2-68.1)
Aged 80+	63 (56)	5 (5)	0.904	0.928	30.6 (20.3-44.5)	20.0 (3.46-100)

## Sheet: 6g.FoxO-Female
Supplementary Table 6g: Kaplan Meier analysis of FoxO pathway; Female samples only.
Columns B and C is the number of individuals that possessed wild type and variant genotypes, and the (#Obs) value in the same columns is the number of observed events for each genotype in the Kaplan Meier analysis
	# High (# Obs Events)	# Low (#Obs Events)	Log Rank P Value	Adjusted Log Rank P Value (FDR)	5 Year Survival Rate (%, 95% CI)
All Except Skin Cancer					High	Low
Full Dataset	493 (285)	53 (39)	0.245	0.712727	72.3 (68.4-76.1)	64.1 (52.3-78.4)
Aged 50-64	183 (72)	21 (13)	0.66	0.812308	90.6 (86.4-95.0)	90.5 (78.7-100)
Aged 65-79	215 (137)	21 (17)	0.00522	0.05568	70.2 (64.2-76.8)	42.3 (30.4-74.6)
Aged 80+	95 (76)	11 (9)	0.648	0.812308	40.6 (31.7-52.0)	27.3 (10.4-71.6)
All Except Skin and Sex Cancer
Full Dataset	227 (164)	30 (22)	0.928	0.928	52.2 (45.9-59.2)	46.7 (31.8-68.4)
Aged 50-64	47 (28)	9 (5)	0.313	0.803368	76.4 (65.2-89.7)	77.8 (54.9-100)
Aged 65-79	118 (83)	16 (13)	0.0261	0.2088	54.2 (45.6-64.3)	32.1 (15.1-64.6)
Aged 80+	62 (53)	5 (4)	0.728	0.832	27.1 (17.9-41.2)	<20 (3.46-100)

## Sheet: 6h.FoxO-Numbers
Supplementary Table 6h. The number of individuals with each genotype (Low and High number of wild type alleles) and each phenotypic characteristic (cohort, sex, comorbidities and grade) in the data set.
All Except Skin Cancer	High Number of Wild Type Alleles (High)					Low Number of Wild Type Alleles (Low)
	Full Data set	Diagnosed 50 To 64	Diagnosed 65 to 79	Diagnosed 80 Plus		Full Data set	Diagnosed 50 To 64	Diagnosed 65 To 79	Diagnosed 80 Plus
# Participants
Cohort
Original	337	44	170	123		49	12	25	12
Offspring	599	269	292	38		42	23	17	2
Sex
Male	495	146	273	76		42	14	24	4
Female	441	167	189	85		49	21	18	10
Number of Comorbidies
Low (0-2)	504	174	251	79		42	14	22	6
Medium (3-4)	386	119	192	75		43	19	17	7
High (5-6)	46	20	19	7		6	2	3	1
Grade
1 (Well differentiated)	102	38	47	17		6	2	4	0
2 (Moderately differentiated)	236	74	127	35		24	8	12	4
3 (Poorly differentiated)	257	78	138	14		25	11	11	3
4 (Not differentiated)	53	17	26	10		3	1	2	0
* Number of missing genotypes imputed with multiple imputation: Full Data set N=0, Diagnosed 50 to 64 N=0 Diagnosed 65 to 79 N = 0, Diagnosed 80 Plus N=0
All Except Skin and Sex Cancer	High Number of Wild Type Alleles (High)					Low Number of Wild Type Alleles (Low)
	Full Data set	Diagnosed 50 To 64	Diagnosed 65 To 79	Diagnosed 80 Plus		Full Data set	Diagnosed 50 To 64	Diagnosed 65 To 79	Diagnosed 80 Plus
# Participants
Cohort
Original	198	44	99	83		32	12	18	7
Offspring	291	269	158	27		22	23	11	1
Sex
Male	286	146	153	53		26	14	15	3
Female	203	167	104	57		28	21	14	5
Number of Comorbidies
Low (0-2)	279	174	154	57		33	14	18	5
Medium (3-4)	188	119	93	49		17	19	9	2
High (5-6)	22	20	10	4		4	2	2	1
Grade
1 (Well differentiated)	50	38	24	13		3	2	2	0
2 (Moderately differentiated)	108	74	58	27		10	8	8	0
3 (Poorly differentiated)	115	78	67	25		13	11	7	3
4 (Not differentiated)	38	17	19	8		2	1	2	0
* Number of missing genotypes imputed with multiple imputation: Full Data set N=0, Diagnosed 50 To 64 N = 0, Diagnosed 65 to 79 N = 0, Diagnosed 80 Plus NA=0

## Sheet: 6i.FoxO-CoxModel
Supplementary Table 6i. Cox Model results for FoxO pathway.
The Cox Model results for FoxO; model stratified by cohort, sex, comorbidity and tumor grade, and adjusted for other significant SNPs from KM analysis. HR is the increased hazard ratio of possessing a low number of wild types compared to having a high number of wild types, the P values are obtained with the score test, and a Benjamini Hochberg FDR cut off <0.05 is deemed significant.
All Except Skin Cancer
Full Data set	HR of possessing a low # WT alleles (compared to risk of 1.0 for High) (95% CI)	Pr(>|t|)	FDR	Significant (FDR<0.05)
Low	1.13 (0.85-1.51)	0.397919	0.398
Diagnosed 50 to 64
Low	1.31 (0.72-2.38)	0.374134	0.398
Diagnosed 65 to 79
Low	1.90 (1.13-3.11)	0.0146341	0.0584	*Marginal
Diagnosed 80 Plus
Low	1.52 (0.69-3.37)	0.293561	0.392
All Except Skin And Sex Cancer
Full Data set
Low	1.21 (0.86-1.72)	0.272635	0.392
Diagnosed 50 to 64
Low	1.74 (0.71-4.22)	0.222838	0.392
Diagnosed 65 to 79
Low	1.87 (1.13-3.11)	0.0146341	0.0584	*Marginal
Diagnosed 80 Plus
Low	1.52 (0.69-3.37)	0.29	0.392

[truncated: 5 more sheets: 6j.FoxO-AdjustInsteadOfStratify, 6k-FoxO-MaleSamples, 6l-FoxO-FemaleSample, 6m.FoxO-OriginalSamples, 6n.FoxO-OffspringSamples]
