# Supplementary material for: Identification of polymorphisms in cancer patients that differentially affect survival with age
Source: Aging (Albany NY). 2017 Oct 20;9(10):2117–36. doi: 10.18632/aging.101305 (PMC5680559; doi:10.18632/aging.101305)
Supplement: Supplementary file 7 [file aging-09-2117-s007.xlsx]

## Sheet: Kaplan Meier
Supplementary Table 7a. Kaplan Meier analysis for SNP of interest (rs4147918) in replication population.
Dataset	SNP	N (#Obs)	P-value
Full Data set	Wild Type	1806 (684)	0.0364
	Variant	140 (54.9)
Diagnosed between 50-64	Wild Type	633 (142)	0.401
	Variant	55 (10)
Diagnosed between 65-79	Wild Type	581 (303)	0.0628
	Variant	41 (15)
Diagnosed >= 80	Wild Type	234 (165)	0.79
	Variant	17 (13)

## Sheet: Cox Model
Supplementary Table 7b. Raw Cox Model results for SNP of interest (rs4147918) in replication population.
Description of Genotype
	AA	AG	GG	AA	AGorGG
N (%)	1806 (92.8)	136 (7)	4 (0.2)	1806 (92.8)	140 (7.2)
Age, mean (SD)	61.6 (9.4)	61.1 (9.9)	56.2 (4.3)	61.6 (9.4)	61 (9.8)
Lifespan, mean (SD)	75 (7.7)	75 (8.1)	69.8 (5.2)	75 (7.7)	74.8 (8)
Duration, mean (SD)	12 (10.4)	13 (10.4)	13.1 (7.5)	12 (10.4)	13 (10.3)
Cancer-Death, yes (%)	684 (37.9)	39 (28.7)	1 (25)	684 (37.9)	40 (28.6)
Cox Regression Results
Dataset	Parameter	coef	secoef	z	p	Number of events	Total Number of observations	Number of observations used	Missing
Full Data set	as.factor(rs4147918)1	-0.249069	0.163265	-1.52555	0.127122	724	2477	1946	531
	as.factor(Site)2	0.0576844	0.140969	0.4092	0.682393	724	2477	1946	531
	as.factor(Site)4	-0.0784166	0.152993	-0.512552	0.608265	724	2477	1946	531
	as.factor(Site)5	2.13762	0.149471	14.3012	0	724	2477	1946	531
	as.factor(Site)6	2.26515	0.15029	15.0719	0	724	2477	1946	531
	as.factor(Site)7	2.52009	0.148045	17.0224	0	724	2477	1946	531
	as.factor(Site)8	2.1577	0.153554	14.0518	0	724	2477	1946	531
	as.factor(CoMoScore)1	0.566549	0.0875503	6.47113	9.72759e-11	724	2477	1946	531
	as.factor(CoMoScore)2	0.673853	0.111339	6.05229	1.42804e-09	724	2477	1946	531
	as.factor(CoMoScore)3	0.298447	0.218167	1.36798	0.17132	724	2477	1946	531
	as.factor(CoMoScore)4	3.34088	1.02427	3.26171	0.0011074	724	2477	1946	531
	as.factor(Sex)2	-0.206662	0.0766961	-2.69456	0.0070482	724	2477	1946	531
Diagnosed 50-64
	as.factor(rs4147918)1	-0.19491	0.331247	-0.588414	0.556255	152	805	688	117
	as.factor(Site)2	0.0748701	0.192418	0.389102	0.697201	152	805	688	117
	as.factor(Site)4	-0.17178	0.217084	-0.791309	0.428764	152	805	688	117
	as.factor(CoMoScore)1	0.66679	0.188936	3.52918	0.000416848	152	805	688	117
	as.factor(CoMoScore)2	1.13801	0.252688	4.50361	6.68083e-06	152	805	688	117
	as.factor(CoMoScore)3	0.871548	0.59114	1.47435	0.140387	152	805	688	117
	as.factor(Sex)2	-0.124315	0.16518	-0.752606	0.451687	152	805	688	117
Diagnosed 65-79
	as.factor(rs4147918)1	-0.43799	0.266374	-1.64426	0.100122	318	828	622	206
	as.factor(Site)2	-0.278986	0.254691	-1.09539	0.273346	318	828	622	206
	as.factor(Site)4	-0.0123983	0.256739	-0.0482915	0.961484	318	828	622	206
	as.factor(Site)5	0.881267	0.220664	3.9937	6.5051e-05	318	828	622	206
	as.factor(Site)6	1.04079	0.224571	4.63456	3.57696e-06	318	828	622	206
	as.factor(Site)7	1.37659	0.222003	6.20078	5.61852e-10	318	828	622	206
	as.factor(Site)8	0.674102	0.238212	2.82984	0.00465716	318	828	622	206
	as.factor(CoMoScore)1	0.504763	0.133769	3.7734	0.000161039	318	828	622	206
	as.factor(CoMoScore)2	0.60054	0.17186	3.49436	0.000475194	318	828	622	206
	as.factor(CoMoScore)3	0.174213	0.347332	0.501576	0.615966	318	828	622	206
	as.factor(CoMoScore)4	3.83129	1.06937	3.58276	0.00033998	318	828	622	206
	as.factor(Sex)2	0.0247162	0.115814	0.213412	0.831005	318	828	622	206
Diagnosed >=80
	as.factor(rs4147918)1	-0.0563832	0.2919	-0.193159	0.846834	178	364	251	113
	as.factor(Site)6	0.0475072	0.227289	0.209017	0.834435	178	364	251	113
	as.factor(Site)7	0.144744	0.22023	0.657241	0.511026	178	364	251	113
	as.factor(Site)8	0.252088	0.22238	1.13359	0.256966	178	364	251	113
	as.factor(CoMoScore)1	0.30206	0.181416	1.66502	0.0959097	178	364	251	113
	as.factor(CoMoScore)2	0.0742168	0.205729	0.360751	0.718286	178	364	251	113
	as.factor(CoMoScore)3	-0.0162981	0.354048	-0.0460335	0.963284	178	364	251	113
	as.factor(Sex)2	-0.25283	0.160819	-1.57214	0.115917	178	364	251	113
CoMoscore: Number of co-morbidities from stroke, diabetes, heart failure, and myocardial infaction (max=4).
Site: Sites 1-4, sites from ARIC. Sites 5-8 from CHS.
Sex: 1 Male, 2 Female
