# Supplementary material for: Identification of polymorphisms in cancer patients that differentially affect survival with age
Source: Aging (Albany NY). 2017 Oct 20;9(10):2117–36. doi: 10.18632/aging.101305 (PMC5680559; doi:10.18632/aging.101305)
Supplement: Supplementary file 8 [file aging-09-2117-s008.xlsx]

## Sheet: Index
Supplenentary Table 8; Index
Table Name	Table Description
8a.SNP.RandomEqual
8b.2879.RandomEqual
8c.23410.RandomEqual
8d.FoxO.RandomEqual

## Sheet: a.SNP.RandomEqual
Supplementary Table 8a. Cox Model (SNP analysis); using an equal number of individuals per age category.
All Except Skin Cancer
	HR of variant (compared to risk of 1.0 for wild type) (95% CI)	Pr(>|t|)	Significant (P < 0.05)
Full Data set (N=176)
rs11574358	1.46 (0.63-3.38)	0.376646
rs1794108	3.61 (1.06-12.2)	0.0393541	*
rs4147918	0.73 (0.31-1.69)	0.459818
rs317913	0.77 (0.35-1.70)	0.521226
Diagnosed 50 to 64 (N=176)
rs11574358	5.65 (2.22-14.3)	0.000290045	*
rs1794108	3.05 (0.61-15.1)	0.168045
Diagnosed 65 to 79 (N=176)
rs11574358	6.77 (1.79-25.6)	0.00752875	*
rs1794108	1.32 (0.36-4.87)	0.665221
rs4147918	3.11 (1.01-9.55)	0.0467578	*
rs317913	1.21 (0.56-2.62)	0.620003
Diagnosed 80 Plus (n=176)
rs11574358	1.03 (0.54-2.01)	0.91408
rs1794108	1.91 (0.81-4.50)	0.142835
rs4147918	1.09 (0.60-1.97)	0.773706
rs317913	0.96 (0.49-1.88)	0.913879
All Except Skin Cancer
Full Data set (N=119)			Significant (P < 0.05)
rs11574358	2.88 (1.06-7.83)	0.0377472	*
rs1794108	1.69 (0.45-7.83)	0.425094
rs4147918	0.88 (0.30-2.61)	0.815325
rs317913	1.19 (0.39-3.61)	0.751908
Diagnosed 50 to 64 (N=119)
rs11574358	1.78 (0.77-4.09)	0.167909
rs1794108	2.12 (0.38-11.68)	0.336573
Diagnosed 65 to 79 (N=119)
rs11574358	1.80 (0.82-3.93)	0.140939
rs1794108	9.63 (2.23-41.6)	0.00252084	*
rs4147918	0.66 (0.19-2.22)	0.49996
rs317913	0.53 (0.18-1.57)	0.253509
Diagnosed 80 Plus (N=119)
rs11574358	0.79 (0.31-2.01)	0.619167
rs1794108	0.98 (0.36-2.68)	0.981544
rs4147918	0.99 (0.52-1.89)	0.983541
rs317913	1.21 (0.55-2.63)	0.636079

## Sheet: b.2879.RandomEqual
Supplementary Table 8b. Cox Model (Gene: Entrez ID 2879); using an equal number of individuals per age category.
All Except Skin Cancer
	HR of different allele combinations (compared to risk of 1.0 for WT_WT) (95% CI)	Pr(>|t|)	Significant (P < 0.05)
Full Data set (N=176)
Var1_Var2	1.05 (0.11-9.75)	0.962602
Var1_WT2	7.83 (2.05-29.9)	0.00313146	*
WT1_Var2	0.99 (0.44-2.20)	0.98183
Diagnosed 50 to 64 (N=176)
Var1_Var2	1.07 (0.12-8.96)	0.943411
Var1_WT2	1.61 (0.57-4.61)	0.369459
WT1_Var2	1.32 (0.72-2.42)	0.360818
Diagnosed 65 to 79 (N=176)
Var1_Var2	0.97 (0.36-2.64)	0.955706
Var1_WT2	1.80 (0.77-4.17)	0.172634
WT1_Var2	0.87 (0.50-1.52)	0.62159
Diagnosed 80 Plus (N=176)
Var1_Var2	1.39 (0.44-4.45)	0.572303
Var1_WT2	1.28 (0.71-2.31)	0.405535
WT1_Var2	1.09 (0.66-1.81)	0.736041
All Except Skin And Sex Cancer			Significant (P < 0.05)
Full Data set (N=119)
Var1_Var2	1.21 (0.26-5.69)	0.799473
Var1_WT2	0.91 (0.22-3.76)	0.89634
WT1_Var2	0.81 (0.37-1.76)	0.585897
Diagnosed 50 to 64 (N=119)
Var1_Var2	1.58 (0.60-4.17)	0.345911
Var1_WT2	1.87 (0.57-6.17)	0.294369
WT1_Var2	1.97 (0.75-5.14)	0.1634
Diagnosed 65 to 79 (N=119)
Var1_Var2	0.69 (0.17-2.83)	0.612241
Var1_WT2	1.50 (0.49-4.59)	0.472542
WT1_Var2	1.28 (0.56-2.90)	0.558315
Diagnosed 80 Plus (N=119)
Var1_Var2	1.32 (0.31-5.68)	0.694227
Var1_WT2	0.76 (0.29-1.94)	0.559511
WT1_Var2	0.80 (0.38-1.66)	0.542255
Repeating the analysis; removing those individuals in the diagnosed >80 category, thus increasing the number of equal individuals per data set (as the diagnosed >80 is the least sampled category).
All Except Skin Cancer
	HR of different allele combinations (compared to risk of 1.0 for WT_WT) (95% CI)	Pr(>|t|)	Significant (FDR<0.05)
Full Data set (N=347)
Var1_Var2	0.72 (0.32-1.60)	0.419802
Var1_WT2	1.24 (0.67-2.29)	0.485348
WT1_Var2	1.04 (0.70-1.54)	0.840999
Diagnosed 50 to 64 (N=347)
Var1_Var2	1.06 (0.35-3.21)	0.915357
Var1_WT2	1.36 (0.59-3.14)	0.471815
WT1_Var2	1.33 (0.87-2.06)	0.183168
Diagnosed 65 to 79 (N=347)
Var1_Var2	9.83 (0.38-1.85)	0.658356
Var1_WT2	1.89 (1.12-3.20)	0.0168209	*
WT1_Var2	0.96 (0.66-1.40)	0.829536
All Except Skin And Sex Cancer
Full Data set (N=287)
Var1_Var2	0.60 (0.23-1.50)	0.265554
Var1_WT2	1.40 (0.71-2.77)	0.325958
WT1_Var2	1.03 (0.68-1.56)	0.900447
Diagnosed 50 to 64 (N=287)
Var1_Var2	1.52 (0.47-4.95)	0.449515
Var1_WT2	3.06 (1.04-9.07)	0.0441303	*
WT1_Var2	1.68 (1.04-3.70)	0.178324
Diagnosed 65 to 79 (N=287)
Var1_Var2	0.82 (0.39-1.70)	0.5911
Var1_WT2	1.82 (1.02-3.24)	0.0418637	*
WT1_Var2	1.14 (0.74-1.76)	0.535127

## Sheet: c.23410.RandomEqual
Supplementary Table 8c. Cox Model (Gene analysis: Entrez ID 23410); using an equal number of individuals per age category.
	HR of possessing a low or medium # WT alleles (compared to risk of 1.0 for High) (95% CI)	Pr(>|t|)	Significant (P < 0.05)
All Except Skin Cancer
Full Data set (N=176)
Low	1.55 (0.39-6.17)	0.523456
Medium	0.88 (0.45-1.70)	0.693843
Diagnosed 50 to 64 (N=176)
Low	1.74 (0.61-4.93)	0.296116
Medium	0.61 (0.28-1.33)	0.218386
Diagnosed 65 to 79 (N=176)
Low	2.03 (1.01-4.10)	0.04569	*
Medium	2.02 (1.01-4.01)	0.0449478	*
Diagnosed 80 Plus (N=176)
Low	1.01 (0.52-2.00)	0.963241
Medium	1.16 (0.71-1.91)	0.541693
All Except Skin And Sex Cancer
Full Data set (N=119)
Low	1.71 (0.41-7.05)	0.442251
Medium	2.06 (0.97-4.36)	0.0582331
Diagnosed 50 to 64 (N=119)
Low	0.61 (0.22-1.66)	0.329885
Medium	0.98 (0.44-2.44)	0.976845
Diagnosed 65 to 79 (N=119)
Low	1.71 (0.36-7.93)	0.491838
Medium	1.72 (0.78-3.77)	0.175947
Diagnosed 80 Plus (N=119)
Low	0.81 (0.35-1.85)	0.612732
Medium	0.91 (0.44-1.89)	0.796928
Repeating the analysis; removing those individuals in the diagnosed >80 category, thus increasing the number of equal individuals per data set (as the diagnosed >80 is the least sampled category).
	HR of possessing a low or medium # WT alleles (compared to risk of 1.0 for High) (95% CI)	Pr(>|t|)	Significant (P < 0.05)
All Except Skin Cancer
Full Data set (N=347)
Low	1.12 (0.61-2.05)	0.705398
Medium	1.32 (0.91-1.94)	0.151752
Diagnosed 50 to 64 (N=347)
Low	1.31 (0.63-2.74)	0.47199
Medium	0.88 (0.54-1.47)	0.640591
Diagnosed 65 to 79 (N=347)
Low	2.13 (1.31-3.45)	0.00229852	*
Medium	1.50 (1.00-2.25)	0.051
All Except Skin And Sex Cancer
Full Data set (N=287)
Low	1.21 (0.71-2.10)	0.477094
Medium	1.11 (0.69-1.82)	0.652652
Diagnosed 50 to 64 (N=287)
Low	1.49 (0.73-3.04)	0.25445
Medium	1.13 (0.50-2.53)	0.752641
Diagnosed 65 to 79 (N=287)
Low	2.35 (1.26-4.42)	0.00896779	*
Medium	1.79 (1.14-2.80)	0.0115176	*

## Sheet: d.FoxO.RandomEqual
Supplementary Table 8d. Cox Model (Pathway analysis: FOXO pathway); using an equal number of individuals per age category.
All Except Skin Cancer	HR of possessing a low # WT alleles (compared to risk of 1.0 for High) (95% CI)	Pr(>|t|)	Significance marked with *
Full Data set (N=158)
Low	0.92 (0.30-2.79)	0.88
Diagnosed 50 to 64 (N=158)
Low	1.17 (0.31-4.44)	0.816633
Diagnosed 65 to 79 (N=158)
Low	1.02 (0.36-2.91)	0.963581
Diagnosed 80 Plus (N=158)
Low	1.97 (0.92-4.23)	0.079631
All Except Skin And Sex Cancer
Full Data set (N=108)
Low	0.63 (0.08-4.52)	0.64
Diagnosed 50 to 64 (N=108)
Low	2.07 (0.54-7.86)	0.281133
Diagnosed 65 to 79 (N=108)
Low	1.39 (0.44-4.33)	0.567771
Diagnosed 80 Plus (N=108)
Low	1.29 (0.54-3.09)	0.56
Repeating the analysis; removing those individuals in the diagnosed >80 category, thus increasing the number of equal individuals per data set (as the diagnosed >80 is the least sampled category).
All Except Skin Cancer	HR of possessing a low # WT alleles (compared to risk of 1.0 for High) (95% CI)	Pr(>|t|)
Full Data set (N=349)
Low	0.79 (0.42-1.43)	0.434584
Diagnosed 50 to 64 (N=349)
Low	1.33 (0.70-2.55)	0.384881
Diagnosed 65 to 79 (N=349)
Low	2.59 (1.52-4.44)	0.000519569	*
All Except Skin And Sex Cancer
Full Data set (N=139)
Low	1.59 (0.74-3.44)	0.23
Diagnosed 50 to 64 (N=139)
Low	3.34 (1.20-9.30)	0.0206218	*
Diagnosed 65 to 79 (N=139)
Low	1.04 (0.44-2.44)	0.927259
